# Supplementary material for: The Trypanosoma brucei MISP family of invariant proteins is co-expressed with BARP as triple helical bundle structures on the surface of salivary gland forms, but is dispensable for parasite development within the tsetse vector
Source: PLoS Pathog. 2023 Mar 30;19(3):e1011269. doi: 10.1371/journal.ppat.1011269 (PMC10089363; doi:10.1371/journal.ppat.1011269)
Supplement: S1 Table — (XLSX) [file ppat.1011269.s027.xlsx]

## Sheet: Glossina_hits_infected
Sequence name	Sequence desc.	Sequence length	Hit desc.	Hit ACC	E-Value	Similarity	Bit-Score	Alignment length	Positives
GMOY005442-PA	apolipophorins	3333	gi|906462078|gb|KNC24442.1|Apolipophorin, partial [Lucilia cuprina]	KNC24442	0	69.9465	3152.07	3364	2353
GMOY005703-PA	myosin heavy muscle isoform X14	2332	gi|1209700992|gb|OWR52085.1|Myosin heavy chain muscle [Danaus plexippus plexippus]	OWR52085	0	80.908	3184.05	2467	1996
GMOY012360-PA	Tsal2 form A	475	gi|125901748|gb|ABN58709.1|Tsal2 form A [Glossina morsitans morsitans]	ABN58709	0	99.4595	761.525	370	368
GMOY012361-PA	deoxyribonuclease I	357	gi|125901748|gb|ABN58709.1|Tsal2 form A [Glossina morsitans morsitans]	ABN58709	2.44421E-96	99.2857	296.975	140	139
GMOY012373-PA	adenosine deaminase CECR1	494	gi|5817644|gb|AAD52850.1|AF140521_1salivary gland growth factor-1 precursor [Glossina morsitans morsitans]	AAD52850	0	99.1903	981.474	494	490
GMOY012312-PA	apyrase isoform X3	747	gi|126143295|gb|ABN80093.1|5' nucleotidase [Glossina morsitans morsitans]	ABN80093	0	97.971	639.802	345	338
GMOY007181-PA	hypothetical protein FF38_12685	265	gi|906465459|gb|KNC27110.1|hypothetical protein FF38_12685 [Lucilia cuprina]	KNC27110	3.8499E-6	47.4286	52.7582	175	83
GMOY004139-PA	---NA---	3154	No Blast Hit
GMOY012375-PA	adenosine deaminase CECR1	535	gi|557773630|ref|XP_005186468.1|PREDICTED: adenosine deaminase CECR1 [Musca domestica]gi|1135084496|ref|XP_019893350.1|PREDICTED: adenosine deaminase CECR1 [Musca domestica]	XP_005186468, XP_019893350	0	78.5859	663.685	495	389
GMOY013075-PA	Gmfb8	218	gi|19168450|gb|AAL83358.1|Gmfb8 [Glossina morsitans morsitans]	AAL83358	2.89664E-98	88.6598	290.041	194	172
GMOY013307-PA	Gmfb8	218	gi|19168450|gb|AAL83358.1|Gmfb8 [Glossina morsitans morsitans]	AAL83358	4.01719E-125	99.5413	357.836	218	217
GMOY007085-PA	actin-5C	429	gi|751778927|ref|XP_011198527.1|PREDICTED: actin, cytoplasmic A3a isoform X1 [Bactrocera dorsalis]	XP_011198527	0	93.6019	792.341	422	395
GMOY003315-PA	muscle	376	gi|557761720|ref|XP_005180578.1|PREDICTED: actin-87E [Musca domestica]gi|907652613|ref|XP_013102502.1|PREDICTED: actin-87E [Stomoxys calcitrans]gi|1037098829|ref|XP_017084468.1|PREDICTED: actin-87E [Drosophila eugracilis]	XP_005180578, XP_013102502, XP_017084468	0	100	785.408	376	376
GMOY001776-PA	muscle	376	gi|557758542|ref|XP_005178998.1|PREDICTED: actin-57B [Musca domestica]gi|907727656|ref|XP_013114010.1|PREDICTED: actin-57B [Stomoxys calcitrans]gi|906470687|gb|KNC31163.1|Actin-57B [Lucilia cuprina]	XP_005178998, XP_013114010, KNC31163	0	100	785.408	376	376
GMOY008458-PA	muscle	376	gi|17975545|ref|NP_524367.1|actin 88F [Drosophila melanogaster]gi|194744060|ref|XP_001954513.1|uncharacterized protein Dana_GF18300 [Drosophila ananassae]gi|194901050|ref|XP_001980065.1|uncharacterized protein Dere_GG16929 [Drosophila erecta]gi|195443944|ref|XP_002069647.1|uncharacterized protein Dwil_GK11462 [Drosophila willistoni]gi|195501269|ref|XP_002097730.1|uncharacterized protein Dyak_GE24…	NP_524367, XP_001954513, XP_001980065, XP_002069647, XP_002097730, XP_002137155, XP_004518136, XP_005181411, XP_011196917, XP_011208262, XP_013098905, XP_014087796, XP_016034553, XP_016925443, XP_017053452, XP_016952383, XP_016979269, XP_017118708, XP_017031544, XP_017008988, XP_017101869, XP_017143475, XP_018797621, XP_020715103, P83967, P83968, P83969, AAA62341, AAA28323, BAA20058, AAF55198, ED…	0	100	786.563	376	376
GMOY012071-PA	AF259958_1Tsal1 precursor	399	gi|8927464|gb|AAF82097.1|AF259958_1Tsal1 protein precursor [Glossina morsitans morsitans]	AAF82097	0	100	825.469	399	399
GMOY012372-PA	adenosine deaminase CECR1	449	gi|5817646|gb|AAD52851.1|AF140522_1salivary gland growth factor-2 [Glossina morsitans morsitans]	AAD52851	0	99.5546	928.702	449	447
GMOY002377-PA	short form isoform X2	1086	gi|924559879|gb|ALC44891.1|Prm [Drosophila busckii]	ALC44891	0	91.7796	1481.85	1107	1016
GMOY012374-PA	adenosine deaminase CECR1-like	467	gi|907613671|ref|XP_013118638.1|PREDICTED: adenosine deaminase CECR1-like [Stomoxys calcitrans]	XP_013118638	3.39818E-142	63.9583	422.935	480	307
GMOY006145-PA	filamin-A isoform X2	2365	gi|755882470|ref|XP_011293621.1|PREDICTED: filamin-A isoform X12 [Musca domestica]	XP_011293621	0	91.1064	4049.2	2350	2141
GMOY012313-PA	apyrase isoform X1	557	gi|14488055|gb|AAK63848.1|AF384674_15'-nucleotidase-related protein [Glossina morsitans morsitans]	AAK63848	0	99.4614	1057.74	557	554
GMOY002950-PA	venom allergen 3-like	259	gi|8927462|gb|AAF82096.1|AF259957_1antigen 5 precursor [Glossina morsitans morsitans]	AAF82096	0	99.6139	542.347	259	258
GMOY010934-PA	glycogenin-1 isoform X4	806	gi|807029283|ref|XP_012157507.1|putative uncharacterized protein DDB_G0271606 isoform X3 [Ceratitis capitata]	XP_012157507	0	91.3313	588.956	323	295
GMOY011737-PA	twitchin isoform X14	8290	gi|1037107304|ref|XP_017155528.1|PREDICTED: twitchin isoform X15 [Drosophila miranda]	XP_017155528	0	86.2894	12812.9	8322	7181
GMOY012268-PA	SGP1_GLOMM ame: Full=Glycine glutamate-rich sgp1 Flags: Precursor	106	gi|150416150|sp|A3RGB0.1|SGP1_GLOMMRecName: Full=Glycine/glutamate-rich protein sgp1; Flags: Precursorgi|126143291|gb|ABN80091.1|glycine/glutamate-rich protein [Glossina morsitans morsitans]	A3RGB0, ABN80091	1.252E-19	97.7778	82.0333	90	88
GMOY001240-PA		16725	No Blast Hit
GMOY001240-PB	isoform X	11703	gi|755898923|ref|XP_011295515.1|PREDICTED: titin isoform X1 [Musca domestica]	XP_011295515	0	89.5189	8183.17	4885	4373
GMOY004375-PA	heat shock 83	716	gi|557754376|ref|XP_005176932.1|PREDICTED: heat shock protein 83 [Musca domestica]	XP_005176932	0	98.4637	1256.89	716	705
GMOY006372-PA	endoplasmin homolog	803	gi|907740771|ref|XP_013116429.1|PREDICTED: endoplasmin homolog [Stomoxys calcitrans]	XP_013116429	0	91.31	1201.04	771	704
GMOY001282-PA	calbindin-32 isoform X2	219	gi|195429230|ref|XP_002062666.1|uncharacterized protein Dwil_GK19573 [Drosophila willistoni]gi|194158751|gb|EDW73652.1|uncharacterized protein Dwil_GK19573 [Drosophila willistoni]	XP_002062666, EDW73652	3.08498E-97	81.6667	290.812	180	147
GMOY009591-PA	disulfide-isomerase	508	gi|557763622|ref|XP_005181522.1|PREDICTED: protein disulfide-isomerase [Musca domestica]	XP_005181522	0	89.7959	816.994	490	440
GMOY009907-PA	cytochrome c-2	108	gi|907699876|ref|XP_013109569.1|PREDICTED: cytochrome c [Stomoxys calcitrans]	XP_013109569	2.12549E-75	100	223.402	108	108
GMOY002443-PA	serine protease inhibitor 4	478	gi|83595243|gb|ABC25073.1|serine protease inhibitor 4 [Glossina morsitans morsitans]	ABC25073	0	94.3902	755.362	410	387
GMOY001043-PA	chitinase CG5210	480	gi|906471976|gb|KNC32196.1|Chitinase-like protein [Lucilia cuprina]	KNC32196	0	87.8261	724.931	460	404
GMOY011554-PA	myosin regulatory light chain 2	249	gi|1037099811|ref|XP_016992282.1|PREDICTED: myosin regulatory light chain 2 [Drosophila rhopaloa]	XP_016992282	9.30858E-94	97.9452	280.026	146	143
GMOY003788-PA	---NA---	948	No Blast Hit
GMOY004147-PA	antifungal peptide-	182	gi|907699440|ref|XP_013109423.1|PREDICTED: uncharacterized protein LOC106088445 [Stomoxys calcitrans]	XP_013109423	7.26773E-33	61.6279	120.939	172	106
GMOY002434-PA	---NA---	205	No Blast Hit
GMOY010728-PA	phenoloxidase 2	692	gi|906466107|gb|KNC27621.1|Phenoloxidase subunit A3 [Lucilia cuprina]	KNC27621	0	88.2779	1169.07	691	610
GMOY011657-PA	14-3-3 epsilon	256	gi|557763388|ref|XP_005181406.1|PREDICTED: 14-3-3 protein epsilon [Musca domestica]gi|907706799|ref|XP_013110502.1|PREDICTED: 14-3-3 protein epsilon [Stomoxys calcitrans]gi|906462372|gb|KNC24654.1|14-3-3 protein epsilon [Lucilia cuprina]	XP_005181406, XP_013110502, KNC24654	0	100	525.783	256	256
GMOY007736-PA	Phosphoglucomutase	1055	gi|906465637|gb|KNC27254.1|Phosphoglucomutase [Lucilia cuprina]	KNC27254	0	91.5044	1011.13	565	517
GMOY011230-PA	delta-1-pyrroline-5-carboxylate mitochondrial	580	gi|906470340|gb|KNC30918.1|hypothetical protein FF38_09302, partial [Lucilia cuprina]	KNC30918	0	91.4384	1033.09	584	534
GMOY009018-PA	PREDICTED: uncharacterized protein LOC106081891	1422	gi|907635676|ref|XP_013099600.1|PREDICTED: uncharacterized protein LOC106081891 [Stomoxys calcitrans]	XP_013099600	0	91.1302	2393.62	1398	1274
GMOY012049-PA	heat shock 70 kDa cognate 4	652	gi|907691579|ref|XP_013108281.1|PREDICTED: heat shock 70 kDa protein cognate 4 [Stomoxys calcitrans]	XP_013108281	0	98.8562	1150.96	612	605
GMOY003216-PA	heat shock 70 kDa cognate 3	657	gi|907663589|ref|XP_013103049.1|PREDICTED: heat shock 70 kDa protein cognate 3 [Stomoxys calcitrans]gi|907663592|ref|XP_013103050.1|PREDICTED: heat shock 70 kDa protein cognate 3 [Stomoxys calcitrans]	XP_013103049, XP_013103050	0	97.8691	1192.95	657	643
GMOY004286-PA	heat shock 70 kDa cognate 1	639	gi|906461139|gb|KNC23682.1|Heat shock 70 kDa protein cognate 1, partial [Lucilia cuprina]	KNC23682	0	98.2026	1157.9	612	601
GMOY009493-PA	heat shock 68	640	gi|63053874|gb|AAY28732.1|heat shock protein 70 [Delia antiqua]	AAY28732	0	94.7205	1124.77	644	610
GMOY009495-PA	heat shock 68	619	gi|63053874|gb|AAY28732.1|heat shock protein 70 [Delia antiqua]	AAY28732	0	85.2941	895.19	612	522
GMOY012066-PA	yellow	415	gi|907665820|ref|XP_013103467.1|PREDICTED: protein yellow [Stomoxys calcitrans]	XP_013103467	0	84.1346	629.017	416	350
GMOY008764-PA	ATP synthase subunit mitochondrial	552	gi|906472801|gb|KNC32844.1|ATP synthase subunit alpha, mitochondrial [Lucilia cuprina]	KNC32844	0	98.7296	1090.1	551	544
GMOY009244-PA	calcium-transporting ATPase sarcoplasmic endoplasmic reticulum type isoform X2	1002	gi|906474112|gb|KNC33775.1|Calcium-transporting ATPase sarcoplasmic/endoplasmic reticulum type [Lucilia cuprina]	KNC33775	0	98.3887	1900.95	993	977
GMOY013247-PA	calreticulin	406	gi|755892171|ref|XP_005189648.2|PREDICTED: calreticulin [Musca domestica]	XP_005189648	0	92.3295	526.168	352	325
GMOY009541-PA	Gmfb8	218	gi|19168450|gb|AAL83358.1|Gmfb8 [Glossina morsitans morsitans]	AAL83358	3.05382E-17	47.7612	82.4185	201	96
GMOY006173-PA	14-3-3 zeta isoform X1	248	gi|557765473|ref|XP_005182436.1|PREDICTED: 14-3-3 protein zeta isoform X1 [Musca domestica]gi|755871926|ref|XP_011292050.1|PREDICTED: 14-3-3 protein zeta isoform X1 [Musca domestica]gi|755871929|ref|XP_011292051.1|PREDICTED: 14-3-3 protein zeta isoform X1 [Musca domestica]gi|1135106510|ref|XP_019891935.1|PREDICTED: 14-3-3 protein zeta isoform X1 [Musca domestica]	XP_005182436, XP_011292050, XP_011292051, XP_019891935	1.86203E-171	100	477.633	233	233
GMOY010075-PA	60S acidic ribosomal P2	113	gi|285026355|dbj|BAI67896.1|acidic ribosomal protein [Sarcophaga peregrina]	BAI67896	4.05886E-33	96.9697	116.701	66	64
GMOY000148-PA	tubulin beta-1 chain	447	gi|24655737|ref|NP_523795.2|beta-Tubulin at 56D, isoform B [Drosophila melanogaster]gi|194753147|ref|XP_001958879.1|uncharacterized protein Dana_GF12605 [Drosophila ananassae]gi|195028304|ref|XP_001987016.1|GH20203 [Drosophila grimshawi]gi|195122798|ref|XP_002005898.1|uncharacterized protein Dmoj_GI20729 [Drosophila mojavensis]gi|195155236|ref|XP_002018511.1|GL16725 [Drosophila persimilis]gi|1953…	NP_523795, XP_001958879, XP_001987016, XP_002005898, XP_002018511, XP_002034592, XP_002049944, XP_002063813, XP_002091781, XP_002082233, XP_002136626, XP_004517667, XP_011179478, XP_011204285, XP_014102211, XP_001974813, XP_016929834, XP_016953273, XP_017025218, XP_017073068, XP_017051224, XP_017149562, XP_017123469, XP_016988184, XP_017013891, XP_017106194, XP_017466531, XP_017838216, XP_0178650…	0	100	855.129	426	426
GMOY006365-PA	tubulin beta chain isoform X1	437	gi|964153447|ref|XP_014765828.1|uncharacterized protein Dana_GF16133, isoform C [Drosophila ananassae]gi|939225864|gb|KPU80697.1|uncharacterized protein Dana_GF16133, isoform C [Drosophila ananassae]	XP_014765828, KPU80697	0	98.0488	803.127	410	402
GMOY000176-PA	Tubulin beta-2 chain	864	gi|914570610|gb|KOB73939.1|Tubulin beta chain [Operophtera brumata]	KOB73939	0	94.6556	1511.51	842	797
GMOY000119-PA	Tubulin beta-2 chain	446	gi|906473232|gb|KNC33181.1|Tubulin beta-2 chain [Lucilia cuprina]	KNC33181	0	99.2857	809.29	420	417
GMOY009393-PA	Tubulin beta-3 chain	437	gi|906459697|gb|KNC22620.1|Tubulin beta-3 chain [Lucilia cuprina]	KNC22620	0	99.7706	868.996	436	435
GMOY011788-PA	Tubulin beta-2 chain	1721	gi|914570610|gb|KOB73939.1|Tubulin beta chain [Operophtera brumata]	KOB73939	0	96.3095	1533.08	840	809
GMOY011989-PA	probable medium-chain specific acyl- mitochondrial	420	gi|906471550|gb|KNC31868.1|putative medium-chain specific acyl-CoA dehydrogenase, mitochondrial [Lucilia cuprina]	KNC31868	0	95.2267	791.186	419	399
GMOY003656-PA	leukocyte elastase inhibitor	395	gi|83595253|gb|ABC25078.1|serine protease inhibitor 43Ab [Glossina morsitans morsitans]	ABC25078	0	100	699.123	336	336
GMOY006418-PA	general odorant-binding 99a	140	gi|281426837|emb|CBA11325.1|odorant binding protein 21, partial [Glossina morsitans morsitans]	CBA11325	8.47517E-100	100	287.345	137	137
GMOY005519-PA	chitinase Idgf4	443	gi|122001617|sp|Q2PQM7.1|IDGF4_GLOMMRecName: Full=Chitinase-like protein Idgf4; AltName: Full=Imaginal disk growth factor protein 4; Flags: Precursorgi|83595289|gb|ABC25096.1|imaginal disc growth factor 4 [Glossina morsitans morsitans]	Q2PQM7, ABC25096	0	99.3007	876.7	429	426
GMOY005839-PA	probable disulfide-isomerase A6	432	gi|907672306|ref|XP_013104517.1|PREDICTED: probable protein disulfide-isomerase A6 [Stomoxys calcitrans]gi|907672309|ref|XP_013104518.1|PREDICTED: probable protein disulfide-isomerase A6 [Stomoxys calcitrans]gi|907672312|ref|XP_013104519.1|PREDICTED: probable protein disulfide-isomerase A6 [Stomoxys calcitrans]	XP_013104517, XP_013104518, XP_013104519	0	89.2157	640.573	408	364
GMOY013291-PA	phenoloxidase 2-like	689	gi|907624572|ref|XP_013097942.1|PREDICTED: phenoloxidase 2-like [Stomoxys calcitrans]	XP_013097942	0	91.1466	1185.24	689	628
GMOY013294-PA	phenoloxidase 2-like	684	gi|907624572|ref|XP_013097942.1|PREDICTED: phenoloxidase 2-like [Stomoxys calcitrans]	XP_013097942	0	89.3119	1087.4	683	610
GMOY009985-PA	histone H2B	227	gi|1036684311|ref|XP_016946219.1|PREDICTED: histone H2B [Drosophila biarmipes]	XP_016946219	4.352E-60	99.187	190.274	123	122
GMOY000629-PA	histone H2B	121	gi|195358314|ref|XP_002045193.1|GM16942 [Drosophila sechellia]gi|194122488|gb|EDW44531.1|GM16942 [Drosophila sechellia]	XP_002045193, EDW44531	3.80244E-64	96.748	196.052	123	119
GMOY000268-PA	Histone H4	121	gi|1036691755|ref|XP_017008549.1|PREDICTED: histone H4-like, partial [Drosophila takahashii]gi|295982350|pdb|3KWQ|BChain B, Structural Characterization Of H3k56q Nucleosomes And Nucleo Arraysgi|295982354|pdb|3KWQ|FChain F, Structural Characterization Of H3k56q Nucleosomes And Nucleo Arraysgi|409107476|pdb|4H9S|CChain C, Complex Structure 6 Of DaxxH3.3(SUB7)H4gi|409107477|pdb|4H9S|DChain D, Comple…	XP_017008549, 3KWQ_B, 3KWQ_F, 4H9S_C, 4H9S_D	5.78201E-52	100	163.696	82	82
GMOY002747-PA	histone H2B	67	gi|1036683358|ref|XP_017017614.1|PREDICTED: histone H2B, partial [Drosophila kikkawai]	XP_017017614	6.95091E-47	100	137.117	67	67
GMOY013105-PA	spectrin alpha chain isoform X1	2428	gi|557755551|ref|XP_005177514.1|PREDICTED: spectrin alpha chain isoform X2 [Musca domestica]	XP_005177514	0	98.1155	4714.83	2441	2395
GMOY008993-PA	V-type proton ATPase catalytic subunit A	614	gi|1037111982|ref|XP_017108823.1|PREDICTED: V-type proton ATPase catalytic subunit A [Drosophila bipectinata]gi|1037111986|ref|XP_017108824.1|PREDICTED: V-type proton ATPase catalytic subunit A [Drosophila bipectinata]	XP_017108823, XP_017108824	0	98.3713	1230.7	614	604
GMOY000743-PA	V-type proton ATPase catalytic subunit A	613	gi|906472755|gb|KNC32804.1|V-type proton ATPase catalytic subunit A isoform 1 [Lucilia cuprina]	KNC32804	0	97.557	1202.58	614	599
GMOY005064-PA	V-type proton ATPase catalytic subunit A	643	gi|807037153|ref|XP_004533402.2|V-type proton ATPase catalytic subunit A [Ceratitis capitata]	XP_004533402	0	91.6522	996.112	575	527
GMOY011752-PA	glyoxalase domain-containing 4 isoform X2	360	gi|906459036|gb|KNC22127.1|hypothetical protein FF38_08089 [Lucilia cuprina]	KNC22127	7.79869E-158	85.1724	449.514	290	247
GMOY005837-PA	sarcoplasmic calcium-binding alpha-B and -A chains	189	gi|906473448|gb|KNC33335.1|hypothetical protein FF38_04341 [Lucilia cuprina]	KNC33335	8.8978E-121	92.5926	344.739	189	175
GMOY010862-PA	cytosolic non-specific dipeptidase	454	gi|907702895|ref|XP_013109891.1|PREDICTED: cytosolic non-specific dipeptidase [Stomoxys calcitrans]	XP_013109891	0	89.2632	804.668	475	424
GMOY004645-PA	Tubulin alpha-1 chain	450	gi|925678215|gb|KOX75272.1|Tubulin alpha-1 chain [Melipona quadrifasciata]	KOX75272	0	100	879.782	431	431
GMOY002613-PA	tubulin alpha-1A chain	450	gi|906470947|gb|KNC31385.1|hypothetical protein FF38_09734 [Lucilia cuprina]	KNC31385	0	99.5556	909.057	450	448
GMOY010079-PA	clathrin heavy chain	1690	gi|557777838|ref|XP_005188552.1|PREDICTED: clathrin heavy chain [Musca domestica]gi|755889041|ref|XP_011294565.1|PREDICTED: clathrin heavy chain [Musca domestica]gi|755889047|ref|XP_011294568.1|PREDICTED: clathrin heavy chain [Musca domestica]	XP_005188552, XP_011294565, XP_011294568	0	98.3393	3288.82	1686	1658
GMOY006840-PA	---NA---	73	No Blast Hit
GMOY001525-PA	ATP synthase subunit mitochondrial	507	gi|906460395|gb|KNC23160.1|ATP synthase subunit beta, mitochondrial [Lucilia cuprina]	KNC23160	0	98.2249	907.901	507	498
GMOY007817-PA	ATP synthase subunit mitochondrial	536	gi|1135105433|ref|XP_005181797.2|PREDICTED: ATP synthase subunit beta, mitochondrial [Musca domestica]	XP_005181797	0	94.7034	769.615	472	447
GMOY002421-PA	60 kDa heat shock mitochondrial	571	gi|906469135|gb|KNC29990.1|60 kDa heat shock protein, mitochondrial [Lucilia cuprina]	KNC29990	0	97.4499	962.6	549	535
GMOY006640-PA	60 kDa heat shock mitochondrial	568	gi|906469135|gb|KNC29990.1|60 kDa heat shock protein, mitochondrial [Lucilia cuprina]	KNC29990	0	94.8905	917.531	548	520
GMOY009539-PA	Gmfb8	220	gi|19168450|gb|AAL83358.1|Gmfb8 [Glossina morsitans morsitans]	AAL83358	8.9739E-19	46.1538	86.6557	208	96
GMOY011666-PA	translationally-controlled tumor homolog	183	gi|498928845|ref|XP_004518504.1|translationally-controlled tumor protein homolog [Ceratitis capitata]	XP_004518504	3.11443E-113	96.5116	324.709	172	166
GMOY011870-PA	fructose-bisphosphate aldolase isoform X1	364	gi|557765833|ref|XP_005182614.1|PREDICTED: fructose-bisphosphate aldolase isoform X3 [Musca domestica]gi|557784399|ref|XP_005191803.1|PREDICTED: fructose-bisphosphate aldolase isoform X1 [Musca domestica]gi|1135078187|ref|XP_019891998.1|PREDICTED: fructose-bisphosphate aldolase isoform X3 [Musca domestica]gi|1135093834|ref|XP_019895258.1|PREDICTED: fructose-bisphosphate aldolase isoform X1 [Musca…	XP_005182614, XP_005191803, XP_019891998, XP_019895258	0	92.8571	635.565	364	338
GMOY010913-PA	Muscle-specific 20	1721	gi|906462926|gb|KNC25114.1|Muscle-specific protein 20 [Lucilia cuprina]	KNC25114	8.56624E-108	98.2955	346.665	176	173
GMOY013074-PA	triose phosphate isomerase	247	gi|907684364|ref|XP_013107065.1|PREDICTED: triosephosphate isomerase [Stomoxys calcitrans]	XP_013107065	2.85168E-157	93.1174	441.81	247	230
GMOY010573-PA	rab GDP dissociation inhibitor alpha	454	gi|906466689|gb|KNC28082.1|hypothetical protein FF38_06263 [Lucilia cuprina]	KNC28082	0	98.1941	873.233	443	435
GMOY006255-PA	60S ribosomal L4	405	gi|907748851|ref|XP_013117715.1|PREDICTED: 60S ribosomal protein L4 [Stomoxys calcitrans]	XP_013117715	0	98.3784	632.484	370	364
GMOY008065-PA	myristoylated alanine-rich C-kinase substrate	174	gi|907595597|ref|XP_013105420.1|PREDICTED: neuromodulin [Stomoxys calcitrans]	XP_013105420	7.22036E-14	89.8551	71.633	69	62
GMOY004228-PA	transferrin	630	gi|83745530|gb|AAM46784.3|AF368908_1transferrin [Glossina morsitans morsitans]	AAM46784	0	100	1318.14	630	630
GMOY003709-PA	failed axon connections isoform X1	1024	gi|907747915|ref|XP_013117405.1|PREDICTED: failed axon connections [Stomoxys calcitrans]	XP_013117405	0	88.5787	659.062	394	349
GMOY000473-PA	glyceraldehyde 3 phosphate dehydrogenase	333	gi|74950265|sp|Q4U3L0.1|G3P_GLOMMRecName: Full=Glyceraldehyde-3-phosphate dehydrogenase; Short=GAPDHgi|64175015|gb|AAY41178.1|glyceraldehyde-3-phosphate dehydrogenase [Glossina morsitans morsitans]	Q4U3L0, AAY41178	0	100	653.284	333	333
GMOY013293-PA	angiotensin-converting enzyme	571	gi|906464847|gb|KNC26609.1|Phenoloxidase subunit A3 [Lucilia cuprina]	KNC26609	0	86.5699	868.226	551	477
GMOY002199-PA	elongation factor 1-alpha 1	463	gi|1062678289|ref|XP_017961089.1|PREDICTED: elongation factor 1-alpha 1 [Drosophila navojoa]	XP_017961089	0	98.8764	897.886	445	440
GMOY003371-PA		356	No Blast Hit
GMOY000749-PA	elongation factor 1-alpha 2	163	gi|1135082592|ref|XP_019892950.1|PREDICTED: elongation factor 1-alpha 2 [Musca domestica]gi|1135082594|ref|XP_019892951.1|PREDICTED: elongation factor 1-alpha 2 [Musca domestica]	XP_019892950, XP_019892951	2.5562E-81	100	243.817	120	120
GMOY013047-PA	profilin	126	gi|906466201|gb|KNC27688.1|Profilin, partial [Lucilia cuprina]	KNC27688	1.12012E-89	100	261.151	126	126
GMOY005926-PA	superoxide dismutase	153	gi|822092602|ref|NP_001295981.1|superoxide dismutase [Musca domestica]gi|38564653|gb|AAR23787.1|SOD [Musca domestica]	NP_001295981, AAR23787	3.07726E-90	91.5033	264.618	153	140
GMOY006352-PA	acidic leucine-rich nuclear phospho 32 family member B	152	gi|557782938|ref|XP_005191079.1|PREDICTED: bacchus [Musca domestica]	XP_005191079	2.03257E-16	78.2051	76.6406	78	61
GMOY008757-PA	anoxia up-regulated-like isoform X3	1713	gi|906474758|gb|KNC34259.1|Protein anoxia up-regulated [Lucilia cuprina]	KNC34259	1.46078E-80	82.4903	292.738	257	212
GMOY003579-PA	sodium potassium-transporting ATPase subunit alpha isoform X4	896	gi|906466862|gb|KNC28219.1|Sodium/potassium-transporting ATPase subunit alpha [Lucilia cuprina]	KNC28219	0	99.7735	1747.25	883	881
GMOY000430-PA	elongation factor 2	844	gi|751777346|ref|XP_011197675.1|PREDICTED: elongation factor 2 [Bactrocera dorsalis]	XP_011197675	0	99.2891	1647.87	844	838
GMOY000979-PA	60S acidic ribosomal P0	312	gi|836552882|gb|AKM70867.1|60S acidic ribosomal protein P0 [Lucilia sericata]	AKM70867	0	98.9091	546.584	275	272
GMOY001073-PA		622	No Blast Hit
GMOY006406-PA	MD-2-related lipid-recognition -like	151	gi|906470542|gb|KNC31051.1|hypothetical protein FF38_00563 [Lucilia cuprina]	KNC31051	6.42675E-69	78.8079	210.305	151	119
GMOY010157-PA	eukaryotic translation initiation factor 3 subunit G-A	268	gi|1036715933|ref|XP_017038004.1|PREDICTED: eukaryotic translation initiation factor 3 subunit G-A [Drosophila kikkawai]gi|1189070074|ref|XP_020802725.1|eukaryotic translation initiation factor 3 subunit G-A [Drosophila serrata]	XP_017038004, XP_020802725	6.59113E-164	92.5651	460.299	269	249
GMOY002642-PA	lethal(2)essential for life	220	gi|822092484|ref|NP_001295898.1|protein lethal(2)essential for life [Musca domestica]gi|588480884|gb|AHK23446.1|heat shock protein 20 [Musca domestica]	NP_001295898, AHK23446	4.67623E-90	80	268.085	195	156
GMOY012309-PA	lethal(2)essential for life	136	gi|907726204|ref|XP_013113825.1|PREDICTED: protein lethal(2)essential for life isoform X2 [Stomoxys calcitrans]gi|907726208|ref|XP_013113826.1|PREDICTED: protein lethal(2)essential for life isoform X2 [Stomoxys calcitrans]gi|907726214|ref|XP_013113827.1|PREDICTED: protein lethal(2)essential for life isoform X2 [Stomoxys calcitrans]	XP_013113825, XP_013113826, XP_013113827	5.5025E-84	95.5224	249.21	134	128
GMOY007353-PA	glutamate mitochondrial isoform X2	391	gi|498999718|ref|XP_004534167.1|glutamate dehydrogenase, mitochondrial isoform X2 [Ceratitis capitata]	XP_004534167	0	98.977	797.349	391	387
GMOY009095-PA	homolog isoform X1	1734	gi|1048060689|ref|XP_017483831.1|PREDICTED: protein 4.1 homolog, partial [Rhagoletis zephyria]	XP_017483831	0	84.019	1659.81	1264	1062
GMOY004744-PA	alpha- sarcomeric isoform X1	885	gi|906459491|gb|KNC22469.1|Alpha-actinin, sarcomeric [Lucilia cuprina]	KNC22469	0	95.2486	1774.6	905	862
GMOY000522-PA	40S ribosomal SA	270	gi|906467392|gb|KNC28624.1|hypothetical protein FF38_04894 [Lucilia cuprina]	KNC28624	3.57419E-157	93.7037	443.351	270	253
GMOY011773-PA	basement membrane-specific heparan sulfate proteoglycan core isoform X1	4351	gi|906471327|gb|KNC31690.1|hypothetical protein FF38_10341, partial [Lucilia cuprina]	KNC31690	0	77.5858	5806.48	4457	3458
GMOY000466-PA	lectin subunit alpha-like	246	gi|89112793|gb|ABD60990.1|lectin [Glossina morsitans morsitans]	ABD60990	6.87834E-76	100	233.032	110	110
GMOY006589-PA	poly(U)-specific endoribonuclease homolog	608	gi|906467193|gb|KNC28456.1|putative poly(U)-specific endoribonuclease [Lucilia cuprina]	KNC28456	0	64.9852	582.022	674	438
GMOY008040-PA	peroxiredoxin 1	194	gi|50897523|gb|AAT85824.1|putative thioredoxin peroxidase 1 [Glossina morsitans morsitans]	AAT85824	1.44761E-144	100	405.216	194	194
GMOY004140-PA	transitional endoplasmic reticulum ATPase TER94 isoform X1	866	gi|929345663|ref|XP_014103656.1|PREDICTED: transitional endoplasmic reticulum ATPase TER94 isoform X1 [Bactrocera oleae]	XP_014103656	0	93.5943	1423.68	843	789
GMOY001238-PA	gelsolin isoform X1	794	gi|1135079925|ref|XP_005183725.3|PREDICTED: gelsolin [Musca domestica]	XP_005183725	0	85.6423	1224.92	794	680
GMOY002110-PA		279	No Blast Hit
GMOY003513-PA	probable citrate mitochondrial	470	gi|122092322|sp|Q0QHL3.1|CISY_GLOMMRecName: Full=Probable citrate synthase, mitochondrial; Flags: Precursorgi|110611270|gb|ABG77984.1|ATP citrate synthase [Glossina morsitans morsitans]	Q0QHL3, ABG77984	0	98.2796	929.472	465	457
GMOY008696-PA	aspartate--tRNA cytoplasmic	663	gi|906467095|gb|KNC28388.1|hypothetical protein FF38_13176, partial [Lucilia cuprina]	KNC28388	0	91.0537	889.026	503	458
GMOY003179-PA	dipeptidyl peptidase 3 isoform X1	789	gi|755880287|ref|XP_011293292.1|PREDICTED: dipeptidyl peptidase 3 isoform X2 [Musca domestica]	XP_011293292	0	90.3439	1285.78	756	683
GMOY005213-PA	dolichyl-diphosphooligosaccharide-- glycosyltransferase subunit 2	646	gi|906469905|gb|KNC30537.1|hypothetical protein FF38_02282 [Lucilia cuprina]	KNC30537	0	82.1895	861.292	612	503
GMOY001219-PA	elongation factor 1	431	gi|125772953|ref|XP_001357735.1|uncharacterized protein Dpse_GA11269 [Drosophila pseudoobscura pseudoobscura]gi|54637467|gb|EAL26869.1|uncharacterized protein Dpse_GA11269 [Drosophila pseudoobscura pseudoobscura]	XP_001357735, EAL26869	0	87.935	665.226	431	379
GMOY007078-PA		184	No Blast Hit
GMOY003093-PA	nitric oxide synthase	1308	gi|907646797|ref|XP_013101350.1|PREDICTED: nitric oxide synthase [Stomoxys calcitrans]gi|907646801|ref|XP_013101351.1|PREDICTED: nitric oxide synthase [Stomoxys calcitrans]gi|907646805|ref|XP_013101352.1|PREDICTED: nitric oxide synthase [Stomoxys calcitrans]	XP_013101350, XP_013101351, XP_013101352	0	86.0817	2123.59	1322	1138
GMOY012116-PA	L-dopachrome tautomerase yellow-f2-like	444	gi|906468728|gb|KNC29686.1|hypothetical protein FF38_05069 [Lucilia cuprina]	KNC29686	0	84.0807	653.284	446	375
GMOY011652-PA	malate mitochondrial	336	gi|906462373|gb|KNC24655.1|hypothetical protein FF38_13566 [Lucilia cuprina]	KNC24655	0	92.5595	591.267	336	311
GMOY009575-PA	annexin B10 isoform X2	319	gi|751473427|ref|XP_011192069.1|PREDICTED: annexin B10 isoform X3 [Zeugodacus cucurbitae]	XP_011192069	1.94552E-179	88.0503	503.827	318	280
GMOY009975-PA	annexin B9 isoform X3	326	gi|755901167|ref|XP_011295868.1|PREDICTED: annexin B9 isoform X2 [Musca domestica]	XP_011295868	0	87.4233	521.546	326	285
GMOY009585-PA	annexin B10	319	gi|906463221|gb|KNC25332.1|Annexin-B10 [Lucilia cuprina]	KNC25332	0	92.1384	570.081	318	293
GMOY007655-PA	Calmodulin	158	gi|1096257350|gb|APA33948.1|seminal fluid protein [Nilaparvata lugens]	APA33948	1.18416E-100	93.6709	293.123	158	148
GMOY008511-PA	vigilin isoform X1	1167	gi|906460439|gb|KNC23186.1|hypothetical protein FF38_02239, partial [Lucilia cuprina]	KNC23186	0	93.8462	1921.75	1105	1037
GMOY003929-PA	golgin-84 isoform X8	1301	gi|929363611|ref|XP_014091365.1|PREDICTED: uncharacterized protein LOC106618236 isoform X2 [Bactrocera oleae]	XP_014091365	1.39685E-144	58.0645	466.463	775	450
GMOY005539-PA	adenylosuccinate synthetase	465	gi|557772845|ref|XP_005186077.1|PREDICTED: adenylosuccinate synthetase [Musca domestica]	XP_005186077	0	89.4624	740.339	465	416
GMOY002029-PA	V-type proton ATPase subunit B	488	gi|909574171|ref|XP_013142773.1|PREDICTED: V-type proton ATPase subunit B [Papilio polytes]gi|930661709|gb|KPJ03596.1|V-type proton ATPase subunit B [Papilio xuthus]	XP_013142773, KPJ03596	0	99.1803	992.26	488	484
GMOY011451-PA	probable fatty acid-binding	132	gi|557772282|ref|XP_005185799.1|PREDICTED: probable fatty acid-binding protein [Musca domestica]	XP_005185799	7.4225E-65	95.3846	198.364	130	124
GMOY010298-PA	troponin skeletal muscle isoform X2	457	gi|1184357991|ref|XP_020716808.1|troponin T, skeletal muscle isoform X2 [Ceratitis capitata]	XP_020716808	9.71477E-136	96.9072	401.364	291	282
GMOY005869-PA		481	No Blast Hit
GMOY003684-PA	enolase	476	gi|751469687|ref|XP_011190039.1|PREDICTED: enolase [Zeugodacus cucurbitae]	XP_011190039	0	93.4537	808.135	443	414
GMOY011561-PA	40S ribosomal S7	193	gi|906463373|gb|KNC25457.1|hypothetical protein FF38_02137 [Lucilia cuprina]	KNC25457	5.14391E-135	99.4819	380.948	193	192
GMOY004070-PA	60S ribosomal L14	167	gi|929355957|ref|XP_014087162.1|PREDICTED: 60S ribosomal protein L14, partial [Bactrocera oleae]	XP_014087162	4.39905E-96	93.4132	280.796	167	156
GMOY008094-PA	microtubule-associated futsch	6131	gi|1098663167|ref|XP_018794458.1|PREDICTED: LOW QUALITY PROTEIN: microtubule-associated protein futsch [Bactrocera latifrons]	XP_018794458	0	82.8885	1722.6	1274	1056
GMOY009118-PA	pleckstrin homology domain-containing family M member 1 isoform X1	945	gi|906460749|gb|KNC23391.1|hypothetical protein FF38_00752 [Lucilia cuprina]	KNC23391	0	79.0909	780.015	660	522
GMOY003173-PA	zinc finger on ecdysone puffs isoform X2	718	gi|755850183|ref|XP_005175127.2|PREDICTED: zinc finger protein on ecdysone puffs [Musca domestica]	XP_005175127	0	77.027	603.594	592	456
GMOY007748-PA	coatomer subunit beta	952	gi|907637317|ref|XP_013099788.1|PREDICTED: coatomer subunit beta [Stomoxys calcitrans]	XP_013099788	0	95.9333	1771.52	959	920
GMOY001831-PA	bleomycin hydrolase	682	gi|906464671|gb|KNC26457.1|hypothetical protein FF38_08584 [Lucilia cuprina]	KNC26457	0	94.1176	846.269	459	432
GMOY003306-PA	TSEP_GLOMM ame: Full= ame: Full=EP-repeat Flags: Precursor	314	gi|74844509|sp|Q95P09.1|TSEP_GLOMMRecName: Full=Protein TsetseEP; AltName: Full=EP-repeat protein; Flags: Precursorgi|15864611|emb|CAC86027.1|tsetseEP protein [Glossina morsitans morsitans]	Q95P09, CAC86027	5.74094E-144	100	413.69	193	193
GMOY003196-PA	chitinase Idgf2	1302	gi|906463638|gb|KNC25664.1|hypothetical protein FF38_06031, partial [Lucilia cuprina]	KNC25664	0	78.9634	1817.74	1312	1036
GMOY006777-PA	pyruvate kinase isoform X1	504	gi|755853163|ref|XP_011294961.1|PREDICTED: pyruvate kinase isoform X2 [Musca domestica]	XP_011294961	0	89.9791	775.007	479	431
GMOY008503-PA	ferritin heavy chain	222	gi|82408370|gb|AAL65406.2|AF368916_1ferritin light-chain [Glossina morsitans morsitans]	AAL65406	9.10575E-167	100	463.381	222	222
GMOY006307-PA	26S proteasome non-ATPase regulatory subunit 13	382	gi|907728921|ref|XP_013114225.1|PREDICTED: 26S proteasome non-ATPase regulatory subunit 13 [Stomoxys calcitrans]	XP_013114225	0	93.1937	660.603	382	356
GMOY002770-PA	spectrin beta chain isoform X2	2270	gi|906469851|gb|KNC30495.1|Spectrin beta chain [Lucilia cuprina]	KNC30495	0	96.9224	4204.82	2307	2236
GMOY008618-PA	Dolichyl-diphosphooligosaccharide-- glycosyltransferase 48 kDa subunit	475	gi|906464685|gb|KNC26471.1|Dolichyl-diphosphooligosaccharide--protein glycosyltransferase 48 kDa subunit [Lucilia cuprina]	KNC26471	0	88.6918	753.436	451	400
GMOY006322-PA	---NA---	177	No Blast Hit
GMOY003358-PA	complement component 1 Q subcomponent-binding mitochondrial	264	gi|906458469|gb|KNC21664.1|hypothetical protein FF38_09769 [Lucilia cuprina]	KNC21664	8.11546E-142	87.5	404.06	264	231
GMOY001946-PA	aminopeptidase isoform X2	496	gi|755858842|ref|XP_011290244.1|PREDICTED: putative aminopeptidase W07G4.4 [Musca domestica]	XP_011290244	0	90.5051	794.653	495	448
GMOY006859-PA	aminopeptidase isoform X2	90	gi|906458094|gb|KNC21373.1|hypothetical protein FF38_12554 [Lucilia cuprina]	KNC21373	4.73784E-37	88.8889	135.191	90	80
GMOY010887-PA	glutathione S-transferase 1	264	gi|906468551|gb|KNC29542.1|hypothetical protein FF38_11521 [Lucilia cuprina]	KNC29542	4.75779E-142	92.8251	402.905	223	207
GMOY013081-PA	succinate-- ligase [ADP-forming] subunit mitochondrial isoform X1	452	gi|906473268|gb|KNC33205.1|hypothetical protein FF38_12724 [Lucilia cuprina]	KNC33205	0	91.17	776.548	453	413
GMOY008925-PA	glutamate synthase [NADH] amyloplastic isoform X1	2127	gi|907729267|ref|XP_013114339.1|PREDICTED: putative glutamate synthase [NADPH] [Stomoxys calcitrans]	XP_013114339	0	90.2643	3572.71	2157	1947
GMOY002913-PA	T-complex 1 subunit beta	532	gi|907664270|ref|XP_013103285.1|PREDICTED: T-complex protein 1 subunit beta isoform X1 [Stomoxys calcitrans]gi|907664273|ref|XP_013103286.1|PREDICTED: T-complex protein 1 subunit beta isoform X2 [Stomoxys calcitrans]	XP_013103285, XP_013103286	0	95.1493	953.74	536	510
GMOY004957-PA	tropomyosin-2 isoform X18	85	gi|195036162|ref|XP_001989540.1|GH18856 [Drosophila grimshawi]gi|193893736|gb|EDV92602.1|GH18856 [Drosophila grimshawi]	XP_001989540, EDV92602	4.16594E-46	96.3415	148.288	82	79
GMOY006765-PA	sarcocystatin-A-like	260	gi|907732768|ref|XP_013114794.1|PREDICTED: sarcocystatin-A-like [Stomoxys calcitrans]	XP_013114794	3.15142E-21	63.964	91.2781	111	71
GMOY008946-PA	small glutamine-rich tetratricopeptide repeat-containing beta	343	gi|907729692|ref|XP_013114484.1|PREDICTED: small glutamine-rich tetratricopeptide repeat-containing protein beta [Stomoxys calcitrans]	XP_013114484	4.00902E-157	80.9375	449.129	320	259
GMOY009540-PA	---NA---	198	No Blast Hit
GMOY008958-PA	endothelin-converting enzyme-like 1	676	gi|906459858|gb|KNC22739.1|hypothetical protein FF38_04090 [Lucilia cuprina]	KNC22739	4.31277E-171	62.0214	510.375	653	405
GMOY004670-PA	talin-2 isoform X1	2842	gi|906462958|gb|KNC25134.1|hypothetical protein FF38_07751, partial [Lucilia cuprina]	KNC25134	0	94.2947	5059.58	2857	2694
GMOY006832-PA	transcription factor glial cells missing 2	673	gi|1135098232|ref|XP_019890139.1|PREDICTED: transcription factor glial cells missing 2 [Musca domestica]	XP_019890139	1.74453E-150	59.2892	458.373	619	367
GMOY007044-PA	NADP-dependent malic enzyme isoform X2	828	gi|907728724|ref|XP_013114156.1|PREDICTED: NADP-dependent malic enzyme-like isoform X2 [Stomoxys calcitrans]	XP_013114156	0	76.038	989.949	843	641
GMOY002007-PA	NADP-dependent malic enzyme isoform X1	661	gi|906462853|gb|KNC25050.1|hypothetical protein FF38_11872, partial [Lucilia cuprina]	KNC25050	0	90.2087	1033.86	623	562
GMOY011976-PA	reticulon-1 isoform X2	402	gi|906459930|gb|KNC22808.1|hypothetical protein FF38_08039 [Lucilia cuprina]	KNC22808	2.63127E-84	59.0686	275.404	408	241
GMOY001349-PA	RNA-binding cabeza isoform X2	411	gi|1135093403|ref|XP_019895178.1|PREDICTED: RNA-binding protein cabeza isoform X2 [Musca domestica]	XP_019895178	2.32498E-60	98.9796	194.897	98	97
GMOY006133-PA	lysosomal aspartic protease	433	gi|755862104|ref|XP_011290712.1|PREDICTED: lysosomal aspartic protease-like isoform X1 [Musca domestica]	XP_011290712	0	92.3858	663.685	394	364
GMOY009129-PA	T-complex 1 subunit theta	552	gi|907751934|ref|XP_013118037.1|PREDICTED: T-complex protein 1 subunit theta [Stomoxys calcitrans]	XP_013118037	0	92.5725	885.56	552	511
GMOY003765-PA	moesin ezrin radixin homolog 1 isoform X1	596	gi|1036906347|ref|XP_017094678.1|PREDICTED: moesin/ezrin/radixin homolog 1 isoform X2 [Drosophila bipectinata]gi|1036906369|ref|XP_017094680.1|PREDICTED: moesin/ezrin/radixin homolog 1 isoform X2 [Drosophila bipectinata]gi|1036906385|ref|XP_017094681.1|PREDICTED: moesin/ezrin/radixin homolog 1 isoform X2 [Drosophila bipectinata]	XP_017094678, XP_017094680, XP_017094681	0	94.7987	971.844	596	565
GMOY000211-PA	transport Sec24C	1121	gi|907624230|ref|XP_013097847.1|PREDICTED: protein transport protein Sec24C [Stomoxys calcitrans]	XP_013097847	0	93.9433	1426.38	776	729
GMOY004175-PA	cAMP-dependent kinase type II regulatory subunit isoform X1	115	gi|964133694|ref|XP_014763877.1|uncharacterized protein Dana_GF13729, isoform B [Drosophila ananassae]gi|939220868|gb|KPU77199.1|uncharacterized protein Dana_GF13729, isoform B [Drosophila ananassae]	XP_014763877, KPU77199	8.15052E-22	76.8116	82.0333	69	53
GMOY010979-PA	ras-related Rab-5B	222	gi|906469142|gb|KNC29992.1|hypothetical protein FF38_05511 [Lucilia cuprina]	KNC29992	1.73335E-139	98.5437	385.571	206	203
GMOY008502-PA	ferritin subunit	205	gi|83944690|gb|ABC48949.1|ferritin heavy chain-like [Glossina morsitans morsitans]	ABC48949	4.86584E-153	100	427.557	205	205
GMOY010807-PA	Kinesin heavy chain	958	gi|906457503|gb|KNC20950.1|Kinesin heavy chain [Lucilia cuprina]	KNC20950	0	94.4615	1639.4	975	921
GMOY000991-PA	kinesin heavy chain	107	gi|907708234|ref|XP_013110945.1|PREDICTED: kinesin heavy chain [Stomoxys calcitrans]gi|907708236|ref|XP_013110946.1|PREDICTED: kinesin heavy chain [Stomoxys calcitrans]gi|907708238|ref|XP_013110947.1|PREDICTED: kinesin heavy chain [Stomoxys calcitrans]gi|907708240|ref|XP_013110948.1|PREDICTED: kinesin heavy chain [Stomoxys calcitrans]gi|907708242|ref|XP_013110949.1|PREDICTED: kinesin heavy chain …	XP_013110945, XP_013110946, XP_013110947, XP_013110948, XP_013110949, XP_013110950, XP_013110951, XP_013110953, XP_013110954, XP_013110955	2.93711E-56	97.0297	192.586	101	98
GMOY000340-PA	10 kDa heat shock mitochondrial	103	gi|907686296|ref|XP_013107237.1|PREDICTED: 10 kDa heat shock protein, mitochondrial [Stomoxys calcitrans]	XP_013107237	9.68065E-58	94	178.333	100	94
GMOY000143-PA	spermine oxidase	1312	gi|557782259|ref|XP_005190744.1|PREDICTED: spermine oxidase [Musca domestica]	XP_005190744	0	75.6757	572.778	481	364
GMOY011771-PA	probable methylmalonate-semialdehyde dehydrogenase [acylating] mitochondrial	379	gi|906471318|gb|KNC31681.1|putative methylmalonate-semialdehyde dehydrogenase [acylating], mitochondrial [Lucilia cuprina]	KNC31681	0	93.1398	639.032	379	353
GMOY009603-PA	aldose reductase	849	gi|906464938|gb|KNC26675.1|hypothetical protein FF38_12926, partial [Lucilia cuprina]	KNC26675	0	85.0719	841.647	556	473
GMOY004216-PA	msta	449	gi|906464697|gb|KNC26483.1|Protein msta, isoform A [Lucilia cuprina]	KNC26483	0	89.2202	739.954	436	389
GMOY000140-PA	sulfhydryl oxidase 1	640	gi|906458639|gb|KNC21807.1|hypothetical protein FF38_03198 [Lucilia cuprina]	KNC21807	0	78.6624	838.18	628	494
GMOY002786-PA	malate cytoplasmic	311	gi|557756604|ref|XP_005178038.1|PREDICTED: malate dehydrogenase, cytoplasmic [Musca domestica]	XP_005178038	0	93.5691	533.872	311	291
GMOY007807-PA	heat shock 23	207	gi|557780962|ref|XP_005190102.1|PREDICTED: heat shock protein 23 [Musca domestica]	XP_005190102	2.34597E-104	89.6175	304.679	183	164
GMOY002284-PA	FK506-binding 59	441	gi|906459345|gb|KNC22358.1|FK506-binding protein 59 [Lucilia cuprina]	KNC22358	0	84.1629	655.21	442	372
GMOY011520-PA	membrane alanyl aminopeptidase	1889	gi|755893570|ref|XP_005190205.2|PREDICTED: membrane alanyl aminopeptidase [Musca domestica]	XP_005190205	0	74.9734	1115.91	939	704
GMOY004668-PA	ERGIC-53	537	gi|906462962|gb|KNC25138.1|Zinc transporter foi, partial [Lucilia cuprina]	KNC25138	0	88.6973	810.831	522	463
GMOY001369-PA	ubiquitin-like modifier-activating enzyme 1	1181	gi|557769526|ref|XP_005184436.1|PREDICTED: ubiquitin-like modifier-activating enzyme 1 [Musca domestica]gi|755877611|ref|XP_011292884.1|PREDICTED: ubiquitin-like modifier-activating enzyme 1 [Musca domestica]	XP_005184436, XP_011292884	0	88.4418	1813.89	1168	1033
GMOY002262-PA	serpin B3	444	gi|83595251|gb|ABC25077.1|serine protease inhibitor 27A [Glossina morsitans morsitans]	ABC25077	0	100	878.626	444	444
GMOY009534-PA	regucalcin isoform X2	375	gi|8980621|dbj|BAA99282.1|anterior fat body protein [Sarcophaga peregrina]	BAA99282	0	85.3659	516.153	328	280
GMOY008106-PA	C3 and PZP-like alpha-2-macroglobulin domain-containing 8	459	gi|906472142|gb|KNC32324.1|hypothetical protein FF38_12481 [Lucilia cuprina]	KNC32324	0	90.9091	516.924	297	270
GMOY004714-PA	dihydropyrimidinase isoform X1	647	gi|195153052|ref|XP_002017444.1|GL22308 [Drosophila persimilis]gi|194112501|gb|EDW34544.1|GL22308 [Drosophila persimilis]	XP_002017444, EDW34544	0	81.3918	963.755	661	538
GMOY000747-PA	nucleoside diphosphate kinase	199	gi|1189085385|ref|XP_020811027.1|nucleoside diphosphate kinase [Drosophila serrata]	XP_020811027	3.13853E-111	94.1176	320.087	170	160
GMOY001239-PA	Gmfb8	216	gi|19168450|gb|AAL83358.1|Gmfb8 [Glossina morsitans morsitans]	AAL83358	1.17863E-7	51.3812	56.225	181	93
GMOY000366-PA	60S ribosomal L5	297	gi|907666599|ref|XP_013103530.1|PREDICTED: 60S ribosomal protein L5 [Stomoxys calcitrans]	XP_013103530	0	96.2838	569.696	296	285
GMOY010829-PA	sorbitol dehydrogenase	358	gi|906461943|gb|KNC24329.1|hypothetical protein FF38_04628 [Lucilia cuprina]	KNC24329	0	89.916	583.948	357	321
GMOY003934-PB	probable aconitate mitochondrial	785	gi|907639061|ref|XP_013100200.1|PREDICTED: probable aconitate hydratase, mitochondrial [Stomoxys calcitrans]	XP_013100200	0	92.7389	1372.45	785	728
GMOY011222-PA	40S ribosomal S4	261	gi|498970418|ref|XP_004526806.1|40S ribosomal protein S4 [Ceratitis capitata]gi|751439300|ref|XP_011183473.1|PREDICTED: 40S ribosomal protein S4 [Zeugodacus cucurbitae]gi|929347740|ref|XP_014096152.1|PREDICTED: 40S ribosomal protein S4 [Bactrocera oleae]gi|1098636064|ref|XP_018785465.1|PREDICTED: 40S ribosomal protein S4 [Bactrocera latifrons]	XP_004526806, XP_011183473, XP_014096152, XP_018785465	0	96.9349	506.138	261	253
GMOY004611-PA	general vesicular transport factor p115	849	gi|906460971|gb|KNC23571.1|hypothetical protein FF38_02824 [Lucilia cuprina]	KNC23571	0	91.5459	1286.94	828	758
GMOY001403-PA	60S ribosomal L22	287	gi|195402039|ref|XP_002059618.1|uncharacterized protein Dvir_GJ14723 [Drosophila virilis]gi|194147325|gb|EDW63040.1|uncharacterized protein Dvir_GJ14723 [Drosophila virilis]	XP_002059618, EDW63040	3.07786E-46	95.9016	162.925	122	117
GMOY002168-PA	ribosomal	139	gi|557775929|ref|XP_005187609.1|PREDICTED: 40S ribosomal protein S12 [Musca domestica]gi|907721606|ref|XP_013113065.1|PREDICTED: 40S ribosomal protein S12 [Stomoxys calcitrans]	XP_005187609, XP_013113065	2.39781E-93	97.8417	271.166	139	136
GMOY002792-PA	3-ketoacyl- mitochondrial	453	gi|557777303|ref|XP_005188286.1|PREDICTED: 3-ketoacyl-CoA thiolase, mitochondrial [Musca domestica]	XP_005188286	0	92.7136	681.789	398	369
GMOY001323-PA	peroxiredoxin- mitochondrial	184	gi|50897517|gb|AAT85821.1|putative peroxiredoxin, partial [Glossina morsitans morsitans]	AAT85821	2.41673E-121	100	345.125	168	168
GMOY008057-PA	coatomer subunit beta	1292	gi|557777008|ref|XP_005188140.1|PREDICTED: coatomer subunit beta' [Musca domestica]	XP_005188140	0	96.0362	1709.5	883	848
GMOY007542-PA	proline dehydrogenase mitochondrial isoform X1	520	gi|907691432|ref|XP_013108231.1|PREDICTED: proline dehydrogenase 1, mitochondrial isoform X3 [Stomoxys calcitrans]	XP_013108231	0	93.2692	947.962	520	485
GMOY009484-PA	pyrroline-5-carboxylate reductase 3	260	gi|110611288|gb|ABG77993.1|pyrroline-5-carboxylate reductase 2 [Glossina morsitans morsitans]	ABG77993	2.05572E-174	88.7681	487.263	276	245
GMOY011640-PA	isoform C	347	gi|557766884|ref|XP_005183134.1|PREDICTED: uncharacterized protein ZK1073.1 isoform X5 [Musca domestica]	XP_005183134	0	96.5217	652.899	345	333
GMOY010249-PA	plastin-3 isoform X2	666	gi|906457238|gb|KNC20721.1|hypothetical protein FF38_07724 [Lucilia cuprina]	KNC20721	0	93.8931	1164.06	655	615
GMOY009287-PA	eukaryotic translation initiation factor 3 subunit E	436	gi|907707215|ref|XP_013110620.1|PREDICTED: eukaryotic translation initiation factor 3 subunit E [Stomoxys calcitrans]	XP_013110620	0	98.3871	872.463	434	427
GMOY011807-PA	heterogeneous nuclear ribonucleo 87F	375	gi|1184356647|ref|XP_020716514.1|heterogeneous nuclear ribonucleoprotein 87F isoform X1 [Ceratitis capitata]	XP_020716514	1.66583E-126	96.4467	374.015	197	190
GMOY005682-PA	myosin light chain alkali isoform X1	155	gi|968060640|ref|XP_002001360.2|uncharacterized protein Dmoj_GI10745, isoform A [Drosophila mojavensis]gi|1060187995|ref|XP_017856341.1|PREDICTED: myosin light chain alkali isoform X1 [Drosophila arizonae]gi|1062650617|ref|XP_017957149.1|PREDICTED: myosin light chain alkali isoform X1 [Drosophila navojoa]gi|946590309|gb|EDW16821.2|uncharacterized protein Dmoj_GI10745, isoform A [Drosophila mojave…	XP_002001360, XP_017856341, XP_017957149, EDW16821	3.34347E-90	98.7097	264.618	155	153
GMOY004791-PA	myophilin	169	gi|557775282|ref|XP_005187287.1|PREDICTED: myophilin [Musca domestica]	XP_005187287	2.24283E-122	99.4083	347.051	169	168
GMOY010107-PA	ribonuclease UK114	138	gi|906473185|gb|KNC33144.1|hypothetical protein FF38_03644 [Lucilia cuprina]	KNC33144	4.66976E-84	94.2029	247.669	138	130
GMOY005378-PA	alanine aminotransferase 1	546	gi|906459753|gb|KNC22662.1|hypothetical protein FF38_05334 [Lucilia cuprina]	KNC22662	0	83.4768	889.797	581	485
GMOY008319-PA	type I inositol 3,4-bisphosphate 4-phosphatase	1327	gi|906467420|gb|KNC28652.1|hypothetical protein FF38_04906 [Lucilia cuprina]	KNC28652	0	84.9776	1998.4	1338	1137
GMOY007820-PA	puromycin-sensitive aminopeptidase isoform X1	1050	gi|906472914|gb|KNC32934.1|hypothetical protein FF38_07776 [Lucilia cuprina]	KNC32934	0	87.1901	1551.18	968	844
GMOY008310-PA	isoform A	170	gi|498941911|ref|XP_004521636.1|uncharacterized protein LOC101462622 [Ceratitis capitata]	XP_004521636	8.28157E-30	70.0935	111.694	107	75
GMOY008699-PA	canopy homolog 2	192	gi|557783667|ref|XP_005191441.1|PREDICTED: protein seele [Musca domestica]	XP_005191441	9.62763E-75	78.2383	228.409	193	151
GMOY000497-PA	heat shock beta-1 isoform X2	177	gi|906459769|gb|KNC22678.1|hypothetical protein FF38_05314, partial [Lucilia cuprina]	KNC22678	1.038E-109	96.6851	315.849	181	175
GMOY001901-PA	microfibril-associated glyco 4-like	349	gi|906458356|gb|KNC21580.1|hypothetical protein FF38_05880 [Lucilia cuprina]	KNC21580	3.609E-64	61.7761	222.631	259	160
GMOY010460-PA	hypothetical protein FF38_00521	200	gi|906475117|gb|KNC34541.1|hypothetical protein FF38_00521 [Lucilia cuprina]	KNC34541	1.1926E-6	71.1864	54.299	59	42
GMOY001423-PA	60S ribosomal L9	190	gi|907743349|ref|XP_013116656.1|PREDICTED: 60S ribosomal protein L9 [Stomoxys calcitrans]gi|907743353|ref|XP_013116657.1|PREDICTED: 60S ribosomal protein L9 [Stomoxys calcitrans]	XP_013116656, XP_013116657	4.4163E-135	98.9418	380.948	189	187
GMOY010754-PA	Na(+) H(+) exchange regulatory cofactor NHE-RF1	275	gi|906458641|gb|KNC21809.1|hypothetical protein FF38_03192 [Lucilia cuprina]	KNC21809	3.38854E-69	76.3006	221.09	173	132
GMOY005166-PA	dnaJ homolog subfamily B member 11	367	gi|906468318|gb|KNC29356.1|Protein croquemort [Lucilia cuprina]	KNC29356	0	91.369	569.696	336	307
GMOY000024-PA	lysozyme	162	gi|1060205219|ref|XP_017836042.1|PREDICTED: lysozyme [Drosophila busckii]gi|924556827|gb|ALC42100.1|CG6426 [Drosophila busckii]	XP_017836042, ALC42100	1.08021E-72	76.3975	220.705	161	123
GMOY008484-PA	cAMP-dependent kinase type II regulatory subunit isoform X3	317	gi|907679173|ref|XP_013106139.1|PREDICTED: cAMP-dependent protein kinase type II regulatory subunit isoform X5 [Stomoxys calcitrans]	XP_013106139	0	94.3396	574.704	318	300
GMOY011979-PA	V-type proton ATPase subunit E	226	gi|751799203|ref|XP_011209552.1|PREDICTED: V-type proton ATPase subunit E [Bactrocera dorsalis]gi|751799205|ref|XP_011209553.1|PREDICTED: V-type proton ATPase subunit E [Bactrocera dorsalis]gi|1098649503|ref|XP_018789795.1|PREDICTED: V-type proton ATPase subunit E [Bactrocera latifrons]	XP_011209552, XP_011209553, XP_018789795	1.48391E-109	92.4779	319.316	226	209
GMOY004246-PA	carboxypeptidase B	417	gi|906474811|gb|KNC34299.1|hypothetical protein FF38_05968 [Lucilia cuprina]	KNC34299	0	88.0096	648.662	417	367
GMOY010676-PA	cuticle 8	202	gi|906472809|gb|KNC32852.1|hypothetical protein FF38_01699 [Lucilia cuprina]	KNC32852	7.88661E-83	80.6931	249.21	202	163
GMOY000886-PA	actin-interacting 1	609	gi|557775163|ref|XP_005187228.1|PREDICTED: actin-interacting protein 1 [Musca domestica]	XP_005187228	0	95.5665	1172.53	609	582
GMOY010218-PA	60S ribosomal L7	255	gi|906469768|gb|KNC30442.1|60S ribosomal protein L7 [Lucilia cuprina]	KNC30442	1.05937E-162	97.0339	456.062	236	229
GMOY002944-PA	---NA---	156	No Blast Hit
GMOY004149-PA	catalase	505	gi|50897533|gb|AAT85829.1|putative catalase, partial [Glossina morsitans morsitans]	AAT85829	0	99.7802	957.977	455	454
GMOY009745-PA	apolipo D-like	191	gi|83944678|gb|ABC48943.1|lipocalin/milk gland protein [Glossina morsitans morsitans]gi|229487232|emb|CAY49913.1|milk gland protein [Glossina morsitans]	ABC48943, CAY49913	3.01707E-133	100	376.326	191	191
GMOY006110-PA	leucine--tRNA cytoplasmic	1189	gi|906471382|gb|KNC31730.1|hypothetical protein FF38_06442 [Lucilia cuprina]	KNC31730	0	90.529	1910.96	1172	1061
GMOY011232-PA	bifunctional 3 -phosphoadenosine 5 -phosphosulfate synthase isoform X3	641	gi|755851246|ref|XP_005175488.2|PREDICTED: bifunctional 3'-phosphoadenosine 5'-phosphosulfate synthase [Musca domestica]	XP_005175488	0	93.7705	1095.88	610	572
GMOY006894-PA	selenium-binding 1	504	gi|907742090|ref|XP_013116511.1|PREDICTED: selenium-binding protein 1 [Stomoxys calcitrans]	XP_013116511	0	84.375	800.431	512	432
GMOY009071-PA	transport Sec23A isoform X2	809	gi|907676770|ref|XP_013105348.1|PREDICTED: protein transport protein Sec23A isoform X2 [Stomoxys calcitrans]	XP_013105348	0	92.5153	1511.12	815	754
GMOY009366-PA	hu-li tai shao isoform X1	2053	gi|906460229|gb|KNC23032.1|Protein hu-li tai shao, partial [Lucilia cuprina]	KNC23032	0	76.7136	1351.65	1065	817
GMOY001436-PA	cytochrome c oxidase subunit 4 isoform mitochondrial	181	gi|907605357|ref|XP_013109154.1|PREDICTED: cytochrome c oxidase subunit 4 isoform 1, mitochondrial [Stomoxys calcitrans]gi|907605361|ref|XP_013109163.1|PREDICTED: cytochrome c oxidase subunit 4 isoform 1, mitochondrial [Stomoxys calcitrans]	XP_013109154, XP_013109163	4.2129E-112	91.1602	322.013	181	165
GMOY009725-PA	PREDICTED: uncharacterized protein LOC106083882	180	gi|907652972|ref|XP_013102620.1|PREDICTED: uncharacterized protein LOC106083882 [Stomoxys calcitrans]	XP_013102620	3.23792E-62	72.1591	195.667	176	127
GMOY007294-PA	2-oxoglutarate dehydrogenase- mitochondrial isoform X2	1124	gi|968043679|ref|XP_015017860.1|uncharacterized protein Dmoj_GI13269, isoform C [Drosophila mojavensis]gi|946596122|gb|KRG06208.1|uncharacterized protein Dmoj_GI13269, isoform C [Drosophila mojavensis]	XP_015017860, KRG06208	0	90.7391	1962.19	1123	1019
GMOY010873-PA	60S ribosomal L19	179	gi|906468710|gb|KNC29675.1|60S ribosomal protein L19 [Lucilia cuprina]	KNC29675	2.78012E-100	87.7451	292.738	204	179
GMOY010846-PA	40S ribosomal S23	143	gi|22024141|ref|NP_610939.2|ribosomal protein S23, isoform A [Drosophila melanogaster]gi|665400850|ref|NP_001286410.1|ribosomal protein S23, isoform B [Drosophila melanogaster]gi|125811142|ref|XP_001361764.1|uncharacterized protein Dpse_GA21060 [Drosophila pseudoobscura pseudoobscura]gi|194754389|ref|XP_001959478.1|uncharacterized protein Dana_GF12897 [Drosophila ananassae]gi|194883144|ref|XP_001…	NP_610939, NP_001286410, XP_001361764, XP_001959478, XP_001975664, XP_001987305, XP_002005403, XP_002017629, XP_002033811, XP_002050700, XP_002063110, XP_002091277, XP_002081467, XP_004526424, XP_005177095, XP_011190839, XP_011202136, XP_013110683, XP_014090729, XP_016927815, XP_016967727, XP_017015179, XP_016973583, XP_017019686, XP_017090216, XP_017069525, XP_017049992, XP_017147934, XP_0171332…	7.82079E-101	100	290.426	143	143
GMOY006622-PA	tripeptidyl-peptidase 2	861	gi|557750195|ref|XP_005174861.1|PREDICTED: tripeptidyl-peptidase 2 [Musca domestica]	XP_005174861	0	88.2058	1332.01	797	703
GMOY006282-PA	probable low-specificity L-threonine aldolase 2	395	gi|557777807|ref|XP_005188537.1|PREDICTED: probable low-specificity L-threonine aldolase 2 [Musca domestica]	XP_005188537	6.41281E-169	76.7196	483.026	378	290
GMOY008955-PA	murinoglobulin-2-like isoform X1	1553	gi|906459895|gb|KNC22776.1|hypothetical protein FF38_04083 [Lucilia cuprina]	KNC22776	0	80.5027	1929.07	1472	1185
GMOY005114-PA	adenylyl cyclase-associated 1 isoform X2	603	gi|1048010660|ref|XP_017466164.1|PREDICTED: adenylyl cyclase-associated protein 1 isoform X4 [Rhagoletis zephyria]	XP_017466164	0	83.7097	889.026	620	519
GMOY010996-PA	Thioester-containing isoform F	3443	gi|906460063|gb|KNC22909.1|hypothetical protein FF38_00374, partial [Lucilia cuprina]	KNC22909	0	68.2243	2637.83	2782	1898
GMOY002066-PA	transport Sec31A isoform X1	1225	gi|1048014805|ref|XP_017468377.1|PREDICTED: protein transport protein Sec31A isoform X3 [Rhagoletis zephyria]	XP_017468377	0	68.8164	1380.16	1318	907
GMOY001984-PA	threonine--tRNA cytoplasmic isoform X1	756	gi|557758409|ref|XP_005178932.1|PREDICTED: threonine--tRNA ligase, cytoplasmic isoform X1 [Musca domestica]	XP_005178932	0	96.4387	1354.35	702	677
GMOY000582-PA	ATP synthase subunit mitochondrial	337	gi|906464363|gb|KNC26199.1|ATP synthase subunit gamma, mitochondrial [Lucilia cuprina]	KNC26199	0	93.9597	548.125	298	280
GMOY005820-PA	Larval serum 2	697	gi|906470035|gb|KNC30653.1|Larval serum protein 2 [Lucilia cuprina]	KNC30653	0	85.592	1071.23	701	600
GMOY013080-PA	acidic mammalian chitinase	460	gi|18201665|gb|AAL65401.1|AF337908_1chitinase Chit1 precursor [Glossina morsitans morsitans]	AAL65401	0	99.5652	919.842	460	458
GMOY010772-PA	transcription factor BTF3 homolog 4	233	gi|906468555|gb|KNC29546.1|hypothetical protein FF38_11552 [Lucilia cuprina]	KNC29546	6.75368E-87	91.716	260.381	169	155
GMOY003217-PA	proliferation-associated 2G4	639	gi|906457874|gb|KNC21209.1|hypothetical protein FF38_10989 [Lucilia cuprina]	KNC21209	0	92.5	639.417	400	370
GMOY004524-PA	eukaryotic translation initiation factor 3 subunit C	929	gi|906474545|gb|KNC34096.1|hypothetical protein FF38_06471 [Lucilia cuprina]	KNC34096	0	91.1935	1373.99	863	787
GMOY010776-PA	Cyt-b5-PB	138	gi|1048000638|ref|XP_017466884.1|PREDICTED: cytochrome b5 [Rhagoletis zephyria]	XP_017466884	3.292E-66	92.3664	202.216	131	121
GMOY000015-PA	adenosylhomocysteinase	450	gi|907599471|ref|XP_013099721.1|PREDICTED: adenosylhomocysteinase [Stomoxys calcitrans]gi|907599474|ref|XP_013099729.1|PREDICTED: adenosylhomocysteinase [Stomoxys calcitrans]	XP_013099721, XP_013099729	0	91.5556	798.505	450	412
GMOY007193-PA	dihydrolipoyl mitochondrial	505	gi|557753939|ref|XP_005176714.1|PREDICTED: dihydrolipoyl dehydrogenase, mitochondrial [Musca domestica]	XP_005176714	0	92.8713	899.427	505	469
GMOY006412-PA	hypothetical protein FF38_08027	206	gi|906459966|gb|KNC22844.1|hypothetical protein FF38_08027 [Lucilia cuprina]	KNC22844	1.18422E-73	77.2973	226.868	185	143
GMOY002420-PA	thymosin beta	127	gi|498972154|ref|XP_004527242.1|thymosin beta [Ceratitis capitata]gi|498972158|ref|XP_004527243.1|thymosin beta [Ceratitis capitata]gi|498972162|ref|XP_004527244.1|thymosin beta [Ceratitis capitata]	XP_004527242, XP_004527243, XP_004527244	1.45192E-72	92.126	217.624	127	117
GMOY003329-PA	60S ribosomal L6	262	gi|1048002379|ref|XP_017475099.1|PREDICTED: 60S ribosomal protein L6 [Rhagoletis zephyria]	XP_017475099	1.26448E-125	89.6947	362.844	262	235
GMOY009173-PA	peroxiredoxin-6-like	220	gi|50897519|gb|AAT85822.1|putative peroxiredoxin [Glossina morsitans morsitans]	AAT85822	5.38203E-166	100	461.455	220	220
GMOY004419-PA	staphylococcal nuclease domain-containing 1	929	gi|906462063|gb|KNC24432.1|hypothetical protein FF38_04264 [Lucilia cuprina]	KNC24432	0	93.0693	1556.96	909	846
GMOY013244-PA	probable enoyl- mitochondrial	293	gi|907638101|ref|XP_013099944.1|PREDICTED: enoyl-CoA hydratase, mitochondrial [Stomoxys calcitrans]	XP_013099944	0	94.5392	543.502	293	277
GMOY003266-PA	translocating chain-associated membrane 1	764	gi|924563527|gb|ALC48152.1|CG32815 [Drosophila busckii]	ALC48152	0	74.8582	626.32	529	396
GMOY009666-PA	nucleolar MIF4G domain-containing 1 homolog	2057	gi|906471352|gb|KNC31706.1|putative nucleolar MIF4G domain-containing protein 1 [Lucilia cuprina]	KNC31706	0	75.6381	894.804	862	652
GMOY010882-PA	ejaculatory bulb-specific 3	128	gi|281426845|emb|CBA11329.1|chemosensory protein 3 [Glossina morsitans morsitans]	CBA11329	5.85971E-76	100	226.483	128	128
GMOY010582-PA	ubiquitin carboxyl-terminal hydrolase	227	gi|907663506|ref|XP_013103018.1|PREDICTED: ubiquitin carboxyl-terminal hydrolase [Stomoxys calcitrans]	XP_013103018	4.20532E-133	85.9031	379.022	227	195
GMOY006698-PA	fructose-1,6-bisphosphatase 1 isoform X1	314	gi|907629490|ref|XP_013098752.1|PREDICTED: fructose-1,6-bisphosphatase 1 [Stomoxys calcitrans]	XP_013098752	0	89.0533	553.518	338	301
GMOY001332-PA	40S ribosomal S25	117	gi|907641705|ref|XP_013100474.1|PREDICTED: 40S ribosomal protein S25 [Stomoxys calcitrans]	XP_013100474	8.8867E-45	96.5812	146.747	117	113
GMOY010262-PA	leupaxin isoform X1	679	gi|195164650|ref|XP_002023159.1|GL21108 [Drosophila persimilis]gi|194105244|gb|EDW27287.1|GL21108 [Drosophila persimilis]	XP_002023159, EDW27287	0	68.2403	775.007	699	477
GMOY002127-PA	Insulin-degrading enzyme	993	gi|906471872|gb|KNC32106.1|Insulin-degrading enzyme [Lucilia cuprina]	KNC32106	0	88.721	1630.54	993	881
GMOY009661-PA	insulin-degrading enzyme	175	gi|968044065|ref|XP_015018053.1|uncharacterized protein Dmoj_GI13481, isoform B [Drosophila mojavensis]gi|968044067|ref|XP_015018054.1|uncharacterized protein Dmoj_GI13481, isoform C [Drosophila mojavensis]gi|946596436|gb|KRG06401.1|uncharacterized protein Dmoj_GI13481, isoform B [Drosophila mojavensis]gi|946596437|gb|KRG06402.1|uncharacterized protein Dmoj_GI13481, isoform C [Drosophila mojavens…	XP_015018053, XP_015018054, KRG06401, KRG06402	6.33015E-82	89.5425	266.544	153	137
GMOY003011-PA	meiosis-specific nuclear structural 1-like	340	gi|907703382|ref|XP_013110022.1|PREDICTED: uncharacterized protein LOC106088860 [Stomoxys calcitrans]	XP_013110022	8.65735E-25	49.1857	108.997	307	151
GMOY005602-PA	acylphosphatase-2	96	gi|907653563|ref|XP_013102681.1|PREDICTED: acylphosphatase-2 isoform X2 [Stomoxys calcitrans]	XP_013102681	3.65294E-44	82.1053	143.28	95	78
GMOY002285-PA	heterogeneous nuclear ribonucleo 27C	422	gi|195387610|ref|XP_002052487.1|uncharacterized protein Dvir_GJ21323 [Drosophila virilis]gi|194148944|gb|EDW64642.1|uncharacterized protein Dvir_GJ21323 [Drosophila virilis]	XP_002052487, EDW64642	0	97.3934	607.831	422	411
GMOY001220-PA	CDGSH iron-sulfur domain-containing 2 homolog	130	gi|751449893|ref|XP_011179199.1|PREDICTED: CDGSH iron-sulfur domain-containing protein 2 homolog [Zeugodacus cucurbitae]	XP_011179199	4.36798E-78	93.0233	231.876	129	120
GMOY008078-PA	serine threonine- phosphatase 2B catalytic subunit 3	576	gi|1062693639|ref|XP_017966184.1|PREDICTED: serine/threonine-protein phosphatase 2B catalytic subunit 3 [Drosophila navojoa]	XP_017966184	0	91.2029	1021.15	557	508
GMOY001361-PA	40S ribosomal S8	208	gi|906464881|gb|KNC26633.1|40S ribosomal protein S8 [Lucilia cuprina]	KNC26633	4.60924E-138	98.5577	389.808	208	205
GMOY005676-PA	ATP-dependent RNA helicase DHX8	2066	gi|906461100|gb|KNC23658.1|hypothetical protein FF38_13728 [Lucilia cuprina]	KNC23658	0	98.2199	1836.62	955	938
GMOY001782-PA	charged multivesicular body 4c	234	gi|195456017|ref|XP_002074966.1|uncharacterized protein Dwil_GK22870, isoform A [Drosophila willistoni]gi|194171051|gb|EDW85952.1|uncharacterized protein Dwil_GK22870, isoform A [Drosophila willistoni]	XP_002074966, EDW85952	4.53352E-101	89.6996	286.574	233	209
GMOY003850-PA	ADP-ribosylation factor 1	182	gi|17136866|ref|NP_476955.1|ADP ribosylation factor at 79F, isoform B [Drosophila melanogaster]gi|24668762|ref|NP_730757.1|ADP ribosylation factor at 79F, isoform A [Drosophila melanogaster]gi|24668769|ref|NP_730758.1|ADP ribosylation factor at 79F, isoform C [Drosophila melanogaster]gi|24668773|ref|NP_730759.1|ADP ribosylation factor at 79F, isoform H [Drosophila melanogaster]gi|24668777|ref|NP_…	NP_476955, NP_730757, NP_730758, NP_730759, NP_730760, NP_001097667, NP_001097668, NP_001262225, XP_320516, XP_001353378, XP_001652515, XP_001845819, XP_001958592, XP_001973775, XP_001984951, XP_002008343, XP_002021149, XP_002040963, XP_002047666, XP_002068485, XP_002095857, XP_004534061, XP_004534062, XP_004534064, XP_004534065, XP_005179243, XP_014764619, XP_015012921, XP_015012922, XP_01501803…	2.83427E-133	100	375.555	182	182
GMOY011744-PA	ADP-ribosylation factor 2	180	gi|194769104|ref|XP_001966647.1|uncharacterized protein Dana_GF23416 [Drosophila ananassae]gi|195450601|ref|XP_002072554.1|uncharacterized protein Dwil_GK13623 [Drosophila willistoni]gi|1036761991|ref|XP_017110168.1|PREDICTED: ADP-ribosylation factor 2 [Drosophila bipectinata]gi|190618172|gb|EDV33696.1|uncharacterized protein Dana_GF23416 [Drosophila ananassae]gi|194168639|gb|EDW83540.1|uncharact…	XP_001966647, XP_002072554, XP_017110168, EDV33696, EDW83540	1.01143E-121	96.6667	346.28	180	174
GMOY006164-PA	guanine nucleotide-binding subunit beta	318	gi|557775743|ref|XP_005187516.1|PREDICTED: guanine nucleotide-binding protein subunit beta-like protein [Musca domestica]	XP_005187516	0	100	652.899	318	318
GMOY007075-PA	dnaJ homolog subfamily A member 4	400	gi|557761736|ref|XP_005180586.1|PREDICTED: dnaJ homolog subfamily A member 4 [Musca domestica]	XP_005180586	0	95	639.802	400	380
GMOY003789-PA	hemocytin	2687	gi|906475226|gb|KNC34630.1|hypothetical protein FF38_09671 [Lucilia cuprina]	KNC34630	0	81.891	3735.65	2623	2148
GMOY010173-PA	nesprin-1 isoform X13	20159	gi|1135078681|ref|XP_019892086.1|PREDICTED: uncharacterized protein LOC101890034 [Musca domestica]	XP_019892086	0	90.3946	11854.1	7121	6437
GMOY002660-PA	chloride intracellular channel exc-4	248	gi|906457387|gb|KNC20857.1|hypothetical protein FF38_11261 [Lucilia cuprina]	KNC20857	4.21086E-162	99.1379	454.136	232	230
GMOY008072-PA	ATP synthase subunit mitochondrial	156	gi|907684554|ref|XP_013107081.1|PREDICTED: ATP synthase subunit delta, mitochondrial [Stomoxys calcitrans]	XP_013107081	7.69508E-87	95.4839	256.144	155	148
GMOY003287-PA	eukaryotic initiation factor 4A isoform X1	538	gi|557759391|ref|XP_005179420.1|PREDICTED: eukaryotic initiation factor 4A isoform X1 [Musca domestica]gi|557759393|ref|XP_005179421.1|PREDICTED: eukaryotic initiation factor 4A isoform X2 [Musca domestica]	XP_005179420, XP_005179421	0	99.5025	785.408	402	400
GMOY002522-PA	eukaryotic initiation factor 4A-III	400	gi|906468785|gb|KNC29728.1|hypothetical protein FF38_05212 [Lucilia cuprina]	KNC29728	0	99.75	823.157	400	399
GMOY011461-PA	ribosome-binding 1 isoform X1	980	gi|906466750|gb|KNC28132.1|hypothetical protein FF38_04375 [Lucilia cuprina]	KNC28132	8.25946E-160	64.7597	500.745	874	566
GMOY007385-PA	filamin-A isoform X8	159	gi|1036080890|ref|XP_016944639.1|PREDICTED: probable cyclin-dependent serine/threonine-protein kinase DDB_G0292550, partial [Drosophila suzukii]	XP_016944639	2.66519E-60	100	192.971	95	95
GMOY004813-PA	dihydrolipoyllysine-residue acetyltransferase component of pyruvate dehydrogenase mitochondrial isoform X1	510	gi|906462314|gb|KNC24613.1|hypothetical protein FF38_09652 [Lucilia cuprina]	KNC24613	0	81.3725	618.231	510	415
GMOY004037-PA	serine cytosolic isoform X1	575	gi|1135090102|ref|XP_019894520.1|PREDICTED: serine hydroxymethyltransferase, cytosolic [Musca domestica]	XP_019894520	0	95.7265	871.307	468	448
GMOY009357-PA	Succinate dehydrogenase [ubiquinone] flavo mitochondrial	338	gi|906460235|gb|KNC23038.1|Succinate dehydrogenase [ubiquinone] flavoprotein subunit, mitochondrial [Lucilia cuprina]	KNC23038	0	92.8994	616.305	338	314
GMOY003693-PA	phosphate-regulating neutral endopeptidase	1254	gi|906458127|gb|KNC21406.1|hypothetical protein FF38_12609 [Lucilia cuprina]	KNC21406	0	79.5632	885.174	641	510
GMOY009425-PA	signal recognition particle subunit SRP72	968	gi|907701313|ref|XP_013109751.1|PREDICTED: signal recognition particle subunit SRP72 [Stomoxys calcitrans]	XP_013109751	0	92.5466	1001.5	644	596
GMOY010266-PA	filaggrin-2 isoform X2	332	gi|557758878|ref|XP_005179165.1|PREDICTED: fibroin heavy chain isoform X2 [Musca domestica]	XP_005179165	1.03501E-57	66.087	202.601	345	228
GMOY005787-PA	FK506-binding 2 isoform X2	210	gi|557750019|ref|XP_005174774.1|PREDICTED: FK506-binding protein 2 isoform X2 [Musca domestica]	XP_005174774	1.39838E-144	96.1905	406.371	210	202
GMOY001164-PA	ras-related Rab-2A	221	gi|907726240|ref|XP_013113831.1|PREDICTED: ras-related protein Rab-2A [Stomoxys calcitrans]	XP_013113831	3.29382E-130	94.6341	370.933	205	194
GMOY005803-PA	deglycase DJ-1	226	gi|906458587|gb|KNC21766.1|hypothetical protein FF38_04002 [Lucilia cuprina]	KNC21766	2.35889E-80	85.4054	244.973	185	158
GMOY009333-PA	DEK isoform X1	593	gi|906475162|gb|KNC34576.1|hypothetical protein FF38_09356 [Lucilia cuprina]	KNC34576	1.40775E-70	81.6327	244.588	196	160
GMOY002088-PA	serine threonine- kinase OSR1	551	gi|906460690|gb|KNC23354.1|hypothetical protein FF38_09606 [Lucilia cuprina]	KNC23354	0	93.271	866.3	535	499
GMOY013024-PA	40S ribosomal S3a	268	gi|906474893|gb|KNC34381.1|hypothetical protein FF38_05923 [Lucilia cuprina]	KNC34381	9.33111E-174	96.371	484.952	248	239
GMOY008210-PA	glycerol-3-phosphate dehydrogenase [NAD(+)] cytoplasmic isoform X1	321	gi|906470107|gb|KNC30725.1|hypothetical protein FF38_11663 [Lucilia cuprina]	KNC30725	0	93.7888	572.778	322	302
GMOY005793-PA	fumarate mitochondrial isoform X1	467	gi|557782876|ref|XP_005191048.1|PREDICTED: fumarate hydratase, mitochondrial isoform X1 [Musca domestica]	XP_005191048	0	97.4304	894.804	467	455
GMOY004884-PA	MICOS complex subunit MIC25	216	gi|906462799|gb|KNC24996.1|hypothetical protein FF38_11820 [Lucilia cuprina]	KNC24996	2.27263E-97	80.5825	287.345	206	166
GMOY004743-PA	trifunctional enzyme subunit mitochondrial	767	gi|906466194|gb|KNC27681.1|hypothetical protein FF38_08075 [Lucilia cuprina]	KNC27681	0	91.9376	1232.24	769	707
GMOY006516-PA	V-type proton ATPase subunit C	714	gi|906465555|gb|KNC27195.1|V-type proton ATPase subunit C [Lucilia cuprina]	KNC27195	0	91.5942	550.821	345	316
GMOY001920-PA	krasavietz	422	gi|906458897|gb|KNC22030.1|Protein extra bases [Lucilia cuprina]	KNC22030	0	96.2085	778.859	422	406
GMOY004614-PA	60S ribosomal L36	181	gi|498935661|ref|XP_004520195.1|60S ribosomal protein L36 [Ceratitis capitata]gi|751479209|ref|XP_011195172.1|PREDICTED: 60S ribosomal protein L36 [Zeugodacus cucurbitae]gi|1048031324|ref|XP_017489594.1|PREDICTED: 60S ribosomal protein L36 [Rhagoletis zephyria]	XP_004520195, XP_011195172, XP_017489594	6.26447E-77	100	230.72	115	115
GMOY005106-PA	organic cation transporter isoform X2	502	gi|906458581|gb|KNC21760.1|Organic cation transporter protein [Lucilia cuprina]	KNC21760	0	83.8	681.019	500	419
GMOY006532-PA	chitooligosaccharidolytic beta-N-acetylglucosaminidase	839	gi|906474858|gb|KNC34346.1|hypothetical protein FF38_05914 [Lucilia cuprina]	KNC34346	0	77.1812	830.476	596	460
GMOY001013-PA	5NUC	616	gi|906472143|gb|KNC32325.1|hypothetical protein FF38_12471, partial [Lucilia cuprina]	KNC32325	0	85.2886	853.973	537	458
GMOY011517-PA	SEC13 homolog	318	gi|907711050|ref|XP_013111236.1|PREDICTED: protein SEC13 homolog [Stomoxys calcitrans]	XP_013111236	0	92.7673	570.852	318	295
GMOY012015-PA	SGP2_GLOMM ame: Full=Proline-rich sgp2 Flags: Precursor	132	gi|150416151|sp|A3RGB1.1|SGP2_GLOMMRecName: Full=Proline-rich protein sgp2; Flags: Precursorgi|126143293|gb|ABN80092.1|proline-rich protein [Glossina morsitans morsitans]	A3RGB1, ABN80092	2.38834E-82	100	225.328	132	132
GMOY005364-PA	40S ribosomal S18	152	gi|498949246|ref|XP_004522823.1|40S ribosomal protein S18 [Ceratitis capitata]gi|751461285|ref|XP_011185442.1|PREDICTED: 40S ribosomal protein S18 [Zeugodacus cucurbitae]gi|751781698|ref|XP_011200027.1|PREDICTED: 40S ribosomal protein S18 [Bactrocera dorsalis]gi|1098638366|ref|XP_018786130.1|PREDICTED: 40S ribosomal protein S18 [Bactrocera latifrons]	XP_004522823, XP_011185442, XP_011200027, XP_018786130	8.02123E-74	96.9466	223.016	131	127
GMOY008928-PA	isoform B	90	gi|557768887|ref|XP_005184119.1|PREDICTED: sperm surface protein Sp17 isoform X2 [Musca domestica]	XP_005184119	7.07292E-35	85.1852	120.553	81	69
GMOY004617-PA	---NA---	570	No Blast Hit
GMOY004025-PA	tyrosine--tRNA cytoplasmic	514	gi|906463966|gb|KNC25925.1|hypothetical protein FF38_03681 [Lucilia cuprina]	KNC25925	0	90.6844	875.93	526	477
GMOY006519-PA	---NA---	200	No Blast Hit
GMOY006473-PA	retinoid-inducible serine carboxypeptidase-like	440	gi|906463656|gb|KNC25675.1|hypothetical protein FF38_06718 [Lucilia cuprina]	KNC25675	0	86.4608	684.871	421	364
GMOY004118-PA	centrosomal of 131 kDa	1195	gi|907642725|ref|XP_013100611.1|PREDICTED: centrosomal protein of 131 kDa [Stomoxys calcitrans]	XP_013100611	0	69.3361	847.81	949	658
GMOY004377-PA	dihydropteridine reductase	235	gi|906471862|gb|KNC32099.1|hypothetical protein FF38_00015, partial [Lucilia cuprina]	KNC32099	1.11105E-143	91.453	406.757	234	214
GMOY008417-PA	cytoplasmic aconitate hydratase-like	898	gi|907728431|ref|XP_013114080.1|PREDICTED: cytoplasmic aconitate hydratase-like [Stomoxys calcitrans]	XP_013114080	0	94.4321	1630.15	898	848
GMOY008251-PA	3-hydroxyacyl- dehydrogenase type-2	207	gi|557768944|ref|XP_005184147.1|PREDICTED: 3-hydroxyacyl-CoA dehydrogenase type-2 [Musca domestica]	XP_005184147	7.85427E-130	84.7162	370.933	229	194
GMOY006900-PA	RER1	198	gi|906471971|gb|KNC32191.1|hypothetical protein FF38_11310 [Lucilia cuprina]	KNC32191	1.39333E-114	91.8782	332.028	197	181
GMOY005672-PA	LIM domain-binding 3 isoform X3	211	gi|907687489|ref|XP_013107565.1|PREDICTED: uncharacterized protein LOC106087167 isoform X10 [Stomoxys calcitrans]	XP_013107565	4.13077E-116	88.5167	335.495	209	185
GMOY010121-PA	venom dipeptidyl peptidase 4 isoform X2	846	gi|557778795|ref|XP_005189026.1|PREDICTED: venom dipeptidyl peptidase 4 isoform X2 [Musca domestica]	XP_005189026	0	87.5	1174.07	736	644
GMOY003508-PA	cytochrome heme mitochondrial	538	gi|557757775|ref|XP_005178619.1|PREDICTED: cytochrome c1, heme protein, mitochondrial [Musca domestica]	XP_005178619	1.05847E-167	93.8144	482.641	291	273
GMOY002604-PA	60S ribosomal L15	204	gi|906463077|gb|KNC25225.1|60S ribosomal protein L15 [Lucilia cuprina]	KNC25225	2.00887E-121	99.5098	347.436	204	203
GMOY005958-PA	prolyl endopeptidase	759	gi|906469682|gb|KNC30382.1|hypothetical protein FF38_02686 [Lucilia cuprina]	KNC30382	0	86.8852	1170.61	732	636
GMOY013072-PA	pyruvate dehydrogenase E1 component subunit mitochondrial isoform X1	514	gi|906458174|gb|KNC21453.1|hypothetical protein FF38_12600 [Lucilia cuprina]	KNC21453	0	78.4926	699.123	544	427
GMOY006943-PA	hypoxia up-regulated 1	936	gi|906465375|gb|KNC27044.1|hypothetical protein FF38_02296, partial [Lucilia cuprina]	KNC27044	0	88.4298	1277.31	847	749
GMOY003258-PA	vacuolar ATPase assembly integral membrane VMA21 homolog	68	gi|1048044218|ref|XP_017493537.1|PREDICTED: vacuolar ATPase assembly integral membrane protein VMA21 homolog [Rhagoletis zephyria]	XP_017493537	5.42512E-6	90.6977	45.4394	43	39
GMOY011707-PA	dual specificity phosphatase 3 isoform X1	237	gi|969508244|ref|XP_015042082.1|uncharacterized protein Dpse_GA20307, isoform B [Drosophila pseudoobscura pseudoobscura]gi|950777697|gb|KRT07019.1|uncharacterized protein Dpse_GA20307, isoform B [Drosophila pseudoobscura pseudoobscura]	XP_015042082, KRT07019	1.04079E-149	94.0928	421.779	237	223
GMOY012084-PA	glucose-6-phosphate isomerase	560	gi|499001768|ref|XP_004534673.1|glucose-6-phosphate isomerase [Ceratitis capitata]gi|1184357154|ref|XP_020716608.1|glucose-6-phosphate isomerase [Ceratitis capitata]	XP_004534673, XP_020716608	0	84.4086	870.922	558	471
GMOY008952-PA	Tiggrin	2268	gi|906459841|gb|KNC22722.1|Tiggrin [Lucilia cuprina]	KNC22722	0	83.2547	2828.12	2120	1765
GMOY005400-PA	general odorant-binding 19d	144	gi|937574005|dbj|BAS69441.1|odorant-binding protein 1 [Delia platura]	BAS69441	9.12603E-45	76.2963	148.673	135	103
GMOY007805-PA	heat shock 23-like	184	gi|323319559|gb|ADX36150.1|heat shock protein 23 [Delia antiqua]	ADX36150	1.68159E-83	86.0606	249.98	165	142
GMOY004534-PA	60S ribosomal L11	201	gi|194753153|ref|XP_001958882.1|uncharacterized protein Dana_GF12342 [Drosophila ananassae]gi|1037093960|ref|XP_017106340.1|PREDICTED: 60S ribosomal protein L11 [Drosophila bipectinata]gi|190620180|gb|EDV35704.1|uncharacterized protein Dana_GF12342 [Drosophila ananassae]	XP_001958882, XP_017106340, EDV35704	2.04085E-131	96.8254	372.089	189	183
GMOY012145-PA	4-hydroxyphenylpyruvate dioxygenase	380	gi|906457116|gb|KNC20613.1|hypothetical protein FF38_06920 [Lucilia cuprina]	KNC20613	0	96.0526	728.398	380	365
GMOY000584-PA	RNA-binding 1 isoform X2	145	gi|964084755|ref|XP_001966096.2|uncharacterized protein Dana_GF19500, partial [Drosophila ananassae]gi|939221212|gb|EDV38505.2|uncharacterized protein Dana_GF19500, partial [Drosophila ananassae]	XP_001966096, EDV38505	4.82039E-55	100	175.252	81	81
GMOY003476-PA	calnexin isoform X1	821	gi|906471188|gb|KNC31585.1|hypothetical protein FF38_12733 [Lucilia cuprina]	KNC31585	0	73.569	677.552	594	437
GMOY003024-PA	T-complex 1 subunit zeta	531	gi|1048071141|ref|XP_017487555.1|PREDICTED: T-complex protein 1 subunit zeta-like [Rhagoletis zephyria]	XP_017487555	0	94.9248	934.865	532	505
GMOY002098-PA	ATP-dependent RNA helicase WM6	815	gi|557753139|ref|XP_005176315.1|PREDICTED: ATP-dependent RNA helicase WM6 [Musca domestica]	XP_005176315	0	97.5904	741.88	415	405
GMOY010765-PA	GILT	240	gi|906471207|gb|KNC31604.1|hypothetical protein FF38_12747 [Lucilia cuprina]	KNC31604	8.55387E-133	88.7931	379.407	232	206
GMOY002897-PA	cytochrome b-c1 complex subunit mitochondrial	443	gi|907677722|ref|XP_013105661.1|PREDICTED: cytochrome b-c1 complex subunit 2, mitochondrial [Stomoxys calcitrans]	XP_013105661	0	84.3891	610.142	442	373
GMOY011043-PA	troponin C	147	gi|557773053|ref|XP_005186180.1|PREDICTED: troponin C [Musca domestica]	XP_005186180	3.83878E-81	99.2857	241.121	140	139
GMOY004900-PA	GTP-binding SAR1b	216	gi|217425997|gb|ACK44330.1|Sar1 [Drosophila silvestris]	ACK44330	8.47836E-117	86.1111	335.88	216	186
GMOY000679-PA	high mobility group D	110	gi|755885137|ref|XP_011294018.1|PREDICTED: high mobility group protein D [Musca domestica]gi|755885141|ref|XP_011294019.1|PREDICTED: high mobility group protein D [Musca domestica]	XP_011294018, XP_011294019	9.99577E-27	96.0526	100.523	76	73
GMOY001201-PA	40S ribosomal S9	194	gi|195127033|ref|XP_002007973.1|uncharacterized protein Dmoj_GI12083 [Drosophila mojavensis]gi|1060236923|ref|XP_017864212.1|PREDICTED: 40S ribosomal protein S9 [Drosophila arizonae]gi|1062662997|ref|XP_017955175.1|PREDICTED: 40S ribosomal protein S9 [Drosophila navojoa]gi|193919582|gb|EDW18449.1|uncharacterized protein Dmoj_GI12083 [Drosophila mojavensis]	XP_002007973, XP_017864212, XP_017955175, EDW18449	5.49839E-128	100	363.229	183	183
GMOY011766-PA	ribosomal S6	248	gi|122001611|sp|Q2PQM1.1|RS6_GLOMMRecName: Full=40S ribosomal protein S6gi|83595301|gb|ABC25102.1|ribosomal protein S6 [Glossina morsitans morsitans]	Q2PQM1, ABC25102	1.01484E-139	100	385.956	216	216
GMOY001033-PA	phosphoglycerate kinase	413	gi|557752290|ref|XP_005175895.1|PREDICTED: phosphoglycerate kinase [Musca domestica]	XP_005175895	0	94.9275	720.694	414	393
GMOY007243-PA	NADH dehydrogenase [ubiquinone] flavo mitochondrial	242	gi|907599641|ref|XP_013099919.1|PREDICTED: NADH dehydrogenase [ubiquinone] flavoprotein 2, mitochondrial [Stomoxys calcitrans]	XP_013099919	5.56312E-161	93.3884	450.669	242	226
GMOY008576-PA	40S ribosomal S28	65	gi|557773232|ref|XP_005186269.1|PREDICTED: 40S ribosomal protein S28 [Musca domestica]	XP_005186269	1.57741E-33	98.0392	100.908	51	50
GMOY003090-PA	voltage-dependent anion-selective channel	282	gi|557769558|ref|XP_005184452.1|PREDICTED: voltage-dependent anion-selective channel [Musca domestica]gi|755877649|ref|XP_011292886.1|PREDICTED: voltage-dependent anion-selective channel [Musca domestica]	XP_005184452, XP_011292886	0	96.8085	533.872	282	273
GMOY001611-PA	asparagine--tRNA cytoplasmic	518	gi|906460659|gb|KNC23331.1|hypothetical protein FF38_11021 [Lucilia cuprina]	KNC23331	0	95.5598	893.264	518	495
GMOY005492-PA	l(2)37Cc	276	gi|907673773|ref|XP_013105048.1|PREDICTED: protein l(2)37Cc [Stomoxys calcitrans]	XP_013105048	0	97.8261	534.258	276	270
GMOY004107-PA	nucleosome assembly 1 paralog	368	gi|906467676|gb|KNC28864.1|hypothetical protein FF38_08438 [Lucilia cuprina]	KNC28864	0	95.0495	516.924	303	288
GMOY004279-PA	26S protease regulatory subunit 10B	396	gi|907672223|ref|XP_013104488.1|PREDICTED: 26S protease regulatory subunit 10B [Stomoxys calcitrans]	XP_013104488	0	98.4848	729.554	396	390
GMOY005690-PA	ubiquitin-60S ribosomal L40	128	gi|17136570|ref|NP_476776.1|ribosomal protein L40, isoform A [Drosophila melanogaster]gi|442625834|ref|NP_001260018.1|ribosomal protein L40, isoform B [Drosophila melanogaster]gi|58390190|ref|XP_317555.2|AGAP007927-PA [Anopheles gambiae str. PEST]gi|125986696|ref|XP_001357111.1|uncharacterized protein Dpse_GA15543 [Drosophila pseudoobscura pseudoobscura]gi|157113624|ref|XP_001652028.1|ubiquitin-6…	NP_476776, NP_001260018, XP_317555, XP_001357111, XP_001652028, XP_001844022, XP_001961598, XP_001968650, XP_001989415, XP_002001572, XP_002020936, XP_002059131, XP_002066660, XP_002087905, XP_004533332, XP_005187659, XP_011183886, XP_013113659, XP_015033520, XP_016023400, XP_016923588, XP_017015089, XP_017132621, XP_016956962, XP_017151581, XP_017046273, XP_017046274, XP_017094532, XP_017029549,…	1.81442E-90	100	263.077	128	128
GMOY004937-PA	short branched chain specific acyl- mitochondrial	416	gi|907668839|ref|XP_013104103.1|PREDICTED: short/branched chain specific acyl-CoA dehydrogenase, mitochondrial [Stomoxys calcitrans]	XP_013104103	0	94.2308	764.992	416	392
GMOY009186-PA	hypothetical protein FF38_09463	349	gi|906467517|gb|KNC28742.1|hypothetical protein FF38_09463 [Lucilia cuprina]	KNC28742	0	89.5317	609.372	363	325
GMOY001806-PA	60S ribosomal L27	143	gi|906458909|gb|KNC22042.1|hypothetical protein FF38_14202 [Lucilia cuprina]	KNC22042	2.50583E-69	97.0588	211.075	136	132
GMOY007990-PA	Glycogen phosphorylase	783	gi|906459931|gb|KNC22809.1|Glycogen phosphorylase [Lucilia cuprina]	KNC22809	0	96.2773	1463.36	779	750
GMOY007860-PA	probable arginine--tRNA cytoplasmic	690	gi|906463897|gb|KNC25870.1|putative arginine--tRNA ligase, cytoplasmic [Lucilia cuprina]	KNC25870	0	87.5362	1064.29	690	604
GMOY006845-PA	---NA---	87	No Blast Hit
GMOY005635-PA	tryptophan--tRNA cytoplasmic	430	gi|194903336|ref|XP_001980850.1|uncharacterized protein Dere_GG17386 [Drosophila erecta]gi|190652553|gb|EDV49808.1|uncharacterized protein Dere_GG17386 [Drosophila erecta]	XP_001980850, EDV49808	0	90.9722	741.495	432	393
GMOY002328-PA	26S proteasome non-ATPase regulatory subunit 14	308	gi|751783059|ref|XP_011200763.1|PREDICTED: 26S proteasome non-ATPase regulatory subunit 14 [Bactrocera dorsalis]gi|929360366|ref|XP_014089579.1|PREDICTED: 26S proteasome non-ATPase regulatory subunit 14 [Bactrocera oleae]gi|1098652660|ref|XP_018790728.1|PREDICTED: 26S proteasome non-ATPase regulatory subunit 14 [Bactrocera latifrons]gi|1098652663|ref|XP_018790729.1|PREDICTED: 26S proteasome non-A…	XP_011200763, XP_014089579, XP_018790728, XP_018790729	0	99.3506	625.165	308	306
GMOY009237-PA	muscle LIM Mlp84B isoform X2	491	gi|906474114|gb|KNC33777.1|Muscle LIM protein Mlp84B [Lucilia cuprina]	KNC33777	0	79.2339	692.575	496	393
GMOY003759-PA	TNF receptor-associated factor family DDB_G0272098	484	gi|907633931|ref|XP_013099403.1|PREDICTED: TNF receptor-associated factor family protein DDB_G0272098 [Stomoxys calcitrans]	XP_013099403	3.04948E-56	53.0214	200.675	513	272
GMOY004732-PA	pyruvate mitochondrial isoform X1	735	gi|557762438|ref|XP_005180933.1|PREDICTED: pyruvate carboxylase, mitochondrial isoform X1 [Musca domestica]	XP_005180933	0	97.0068	1379.77	735	713
GMOY011348-PA	extended synaptotagmin-2 isoform X2	860	gi|907678110|ref|XP_013105788.1|PREDICTED: extended synaptotagmin-2 isoform X2 [Stomoxys calcitrans]	XP_013105788	0	86.4662	1263.44	798	690
GMOY011965-PA	60S ribosomal L23a	233	gi|929350662|ref|XP_014102943.1|PREDICTED: 60S ribosomal protein L23a [Bactrocera oleae]	XP_014102943	2.45031E-73	99.2424	229.18	132	131
GMOY001933-PA	eukaryotic translation initiation factor 4 gamma 3	1595	gi|1048022710|ref|XP_017471921.1|PREDICTED: eukaryotic translation initiation factor 4 gamma 3 isoform X1 [Rhagoletis zephyria]	XP_017471921	0	65.4393	1013.45	1195	782
GMOY010278-PA	peptidyl-prolyl cis-trans isomerase-like isoform X2	332	gi|906474064|gb|KNC33741.1|Peptidyl-prolyl cis-trans isomerase [Lucilia cuprina]	KNC33741	7.92893E-112	84.6512	343.199	215	182
GMOY007570-PA	peroxiredoxin-6	222	gi|50897515|gb|AAT85820.1|putative peroxiredoxin [Glossina morsitans morsitans]	AAT85820	7.90991E-166	99.0991	461.07	222	220
GMOY003663-PA	leukotriene A-4 hydrolase isoform X1	808	gi|906463425|gb|KNC25502.1|hypothetical protein FF38_05158 [Lucilia cuprina]	KNC25502	0	92.1697	1106.66	613	565
GMOY005435-PA	potassium voltage-gated channel subfamily KQT member 2 isoform X1	934	gi|907667942|ref|XP_013103811.1|PREDICTED: potassium voltage-gated channel subfamily KQT member 2 isoform X1 [Stomoxys calcitrans]	XP_013103811	0	94.8276	770.77	406	385
GMOY006034-PB	ADP,ATP carrier	315	gi|6942136|gb|AAF32322.1|AF218587_1ADP/ATP translocase [Lucilia cuprina]	AAF32322	0	98	569.311	300	294
GMOY006055-PA	xaa-Pro dipeptidase	481	gi|906458401|gb|KNC21618.1|hypothetical protein FF38_13435 [Lucilia cuprina]	KNC21618	0	91.0042	842.417	478	435
GMOY009226-PA	Cysteine--tRNA cytoplasmic	730	gi|906461097|gb|KNC23655.1|Cysteine--tRNA ligase, cytoplasmic [Lucilia cuprina]	KNC23655	0	85.521	1107.82	739	632
GMOY010555-PA	serine protease	475	gi|1135095470|ref|XP_019893047.1|PREDICTED: putative serine protease K12H4.7 [Musca domestica]	XP_019893047	0	79.4248	638.262	452	359
GMOY009783-PA	ecto-NOX disulfide-thiol exchanger 2	809	gi|1135086603|ref|XP_019893819.1|PREDICTED: ecto-NOX disulfide-thiol exchanger 2 [Musca domestica]	XP_019893819	0	67.474	733.406	867	585
GMOY002594-PA	proteasome subunit beta type-6	217	gi|906468517|gb|KNC29508.1|hypothetical protein FF38_11509 [Lucilia cuprina]	KNC29508	1.37519E-130	94.0092	371.703	217	204
GMOY000858-PA	methyltransferase 9	754	gi|906467677|gb|KNC28865.1|hypothetical protein FF38_08433 [Lucilia cuprina]	KNC28865	0	91.1765	526.554	306	279
GMOY009685-PA	vinculin	958	gi|557768601|ref|XP_005183978.1|PREDICTED: vinculin [Musca domestica]	XP_005183978	0	96.0417	1732.61	960	922
GMOY002902-PA	succinyl- :3-ketoacid coenzyme A transferase mitochondrial	519	gi|906474862|gb|KNC34350.1|hypothetical protein FF38_05910 [Lucilia cuprina]	KNC34350	0	89.9614	852.818	518	466
GMOY008973-PA	AChain Kinetic Crystallography Of Alpha_e7-carboxylesterse From Lucilla Cuprina - Absorbed X-ray Dose Mgy Temp 150k	570	gi|1336080|gb|AAB67728.1|E3 [Lucilia cuprina]	AAB67728	0	83.1579	860.522	570	474
GMOY002785-PA	ubiquitin thioesterase otubain-like	262	gi|906471411|gb|KNC31752.1|putative ubiquitin thioesterase otubain [Lucilia cuprina]	KNC31752	1.15993E-176	94.6565	491.886	262	248
GMOY006970-PA	basement membrane-specific heparan sulfate proteoglycan core isoform X1	801	gi|907629602|ref|XP_013098778.1|PREDICTED: basement membrane-specific heparan sulfate proteoglycan core protein isoform X7 [Stomoxys calcitrans]	XP_013098778	1.76925E-38	55.7214	162.155	201	112
GMOY007699-PA	40S ribosomal S3	241	gi|836552878|gb|AKM70865.1|40S ribosomal protein S3 [Lucilia sericata]gi|906469066|gb|KNC29949.1|40S ribosomal protein S3 [Lucilia cuprina]	AKM70865, KNC29949	2.44787E-170	98.3402	474.167	241	237
GMOY010879-PA	adenylate kinase	247	gi|906459251|gb|KNC22281.1|hypothetical protein FF38_12909 [Lucilia cuprina]	KNC22281	6.03014E-147	90.1639	415.231	244	220
GMOY012059-PA	neither inactivation nor afterpotential C	1120	gi|1098623388|ref|XP_018804293.1|PREDICTED: neither inactivation nor afterpotential protein C [Bactrocera latifrons]	XP_018804293	0	92.1359	1863.2	1030	949
GMOY010189-PA	eukaryotic translation initiation factor 2 subunit 2	314	gi|195019784|ref|XP_001985054.1|GH16843 [Drosophila grimshawi]gi|193898536|gb|EDV97402.1|GH16843 [Drosophila grimshawi]	XP_001985054, EDV97402	1.14657E-147	88.5714	422.935	315	279
GMOY002750-PA	dopamine N-acetyltransferase isoform X2	198	gi|557775671|ref|XP_005187480.1|PREDICTED: dopamine N-acetyltransferase isoform X1 [Musca domestica]gi|1135086171|ref|XP_019893725.1|PREDICTED: dopamine N-acetyltransferase isoform X2 [Musca domestica]	XP_005187480, XP_019893725	4.83293E-110	89.4737	321.242	190	170
GMOY008231-PA	arginine serine-rich 1-like isoform X1	420	gi|906472002|gb|KNC32216.1|hypothetical protein FF38_01541, partial [Lucilia cuprina]	KNC32216	1.83351E-113	73.0897	345.51	301	220
GMOY006460-PA	serine--tRNA cytoplasmic	495	gi|557782219|ref|XP_005190724.1|PREDICTED: serine--tRNA ligase, cytoplasmic [Musca domestica]	XP_005190724	0	93.1864	904.049	499	465
GMOY002115-PA	translocon-associated subunit beta	190	gi|1048041840|ref|XP_017477836.1|PREDICTED: translocon-associated protein subunit beta-like [Rhagoletis zephyria]gi|1048044492|ref|XP_017493682.1|PREDICTED: translocon-associated protein subunit beta-like [Rhagoletis zephyria]	XP_017477836, XP_017493682	2.16938E-118	92.1466	338.576	191	176
GMOY001823-PA	eukaryotic translation initiation factor 4H isoform X1	286	gi|751464640|ref|XP_011187272.1|PREDICTED: eukaryotic translation initiation factor 4H isoform X3 [Zeugodacus cucurbitae]	XP_011187272	9.95524E-68	98.1982	218.009	111	109
GMOY004167-PA	eukaryotic translation initiation factor 5A	160	gi|499002022|ref|XP_004534736.1|eukaryotic translation initiation factor 5A [Ceratitis capitata]gi|751459647|ref|XP_011184549.1|PREDICTED: eukaryotic translation initiation factor 5A [Zeugodacus cucurbitae]gi|751792882|ref|XP_011206104.1|PREDICTED: eukaryotic translation initiation factor 5A [Bactrocera dorsalis]gi|929361685|ref|XP_014090299.1|PREDICTED: eukaryotic translation initiation factor 5…	XP_004534736, XP_011184549, XP_011206104, XP_014090299, XP_018791786	4.71222E-119	99.375	325.865	160	159
GMOY007382-PA	reticulon-1-A isoform X5	219	gi|557779556|ref|XP_005189405.1|PREDICTED: reticulon-1-A isoform X1 [Musca domestica]	XP_005189405	1.9162E-144	96.347	406.757	219	211
GMOY011526-PA	adipocyte plasma membrane-associated	555	gi|85822205|gb|ABC84591.1|hemomucin protein [Glossina morsitans morsitans]	ABC84591	0	98.7387	999.194	555	548
GMOY011173-PA	ubiquitin-conjugating enzyme E2 variant 1	143	gi|906469313|gb|KNC30127.1|hypothetical protein FF38_09518 [Lucilia cuprina]	KNC30127	3.79905E-100	99.3007	288.5	143	142
GMOY000444-PA	eukaryotic translation initiation factor 3 subunit L	538	gi|1048049532|ref|XP_017479839.1|PREDICTED: eukaryotic translation initiation factor 3 subunit L [Rhagoletis zephyria]	XP_017479839	0	97.8887	1033.48	521	510
GMOY000267-PA	histone H2A	122	gi|759055400|ref|XP_011336931.1|PREDICTED: histone H2A [Ooceraea biroi]gi|607361202|gb|EZA55495.1|Histone H2A [Ooceraea biroi]	XP_011336931, EZA55495	2.04036E-68	100	206.838	103	103
GMOY011014-PA	D3	323	gi|906466398|gb|KNC27833.1|hypothetical protein FF38_12500 [Lucilia cuprina]	KNC27833	1.00018E-101	74.9049	304.679	263	197
GMOY013305-PA	Gmfb8	211	gi|19168450|gb|AAL83358.1|Gmfb8 [Glossina morsitans morsitans]	AAL83358	2.16667E-68	77.4011	213.772	177	137
GMOY008795-PA	ras-related Rab-1A	205	gi|1060257900|ref|XP_017847309.1|PREDICTED: ras-related protein Rab-1A [Drosophila busckii]	XP_017847309	3.76069E-150	99.0244	420.239	205	203
GMOY000420-PA	rho GDP-dissociation inhibitor 1	236	gi|906469964|gb|KNC30588.1|hypothetical protein FF38_11974, partial [Lucilia cuprina]	KNC30588	1.27901E-111	80.8696	324.709	230	186
GMOY010851-PA	heat shock 70 kDa cognate 5	701	gi|557754727|ref|XP_005177106.1|PREDICTED: heat shock 70 kDa protein cognate 5 [Musca domestica]	XP_005177106	0	94.721	1150.96	663	628
GMOY002175-PA	acyl carrier mitochondrial isoform X3	165	gi|906460397|gb|KNC23162.1|Acyl carrier protein, mitochondrial, partial [Lucilia cuprina]	KNC23162	5.1587E-88	82.0359	249.21	167	137
GMOY009988-PA	ras-related Rab-11A	214	gi|557757206|ref|XP_005178336.1|PREDICTED: ras-related protein Rab-11A [Musca domestica]gi|907687678|ref|XP_013107630.1|PREDICTED: ras-related protein Rab-11A [Stomoxys calcitrans]gi|907687681|ref|XP_013107631.1|PREDICTED: ras-related protein Rab-11A [Stomoxys calcitrans]gi|907687684|ref|XP_013107632.1|PREDICTED: ras-related protein Rab-11A [Stomoxys calcitrans]gi|907687687|ref|XP_013107633.1|PRE…	XP_005178336, XP_013107630, XP_013107631, XP_013107632, XP_013107633, XP_013107634, XP_013107635	4.20344E-156	99.0654	436.032	214	212
GMOY004379-PA	ATP synthase subunit mitochondrial	236	gi|906472925|gb|KNC32945.1|ATP synthase subunit b, mitochondrial [Lucilia cuprina]	KNC32945	5.91579E-149	91.2134	419.853	239	218
GMOY006844-PA	ATP synthase subunit mitochondrial	180	gi|906472113|gb|KNC32299.1|ATP synthase subunit d, mitochondrial [Lucilia cuprina]	KNC32299	8.6887E-105	89.7727	303.523	176	158
GMOY006991-PA	tubulointerstitial nephritis antigen-like	434	gi|906473803|gb|KNC33534.1|hypothetical protein FF38_03862 [Lucilia cuprina]	KNC33534	0	86.8421	702.975	418	363
GMOY009373-PA	glutathione S-transferase S1	235	gi|906461787|gb|KNC24200.1|hypothetical protein FF38_02174 [Lucilia cuprina]	KNC24200	2.69637E-142	97.549	402.905	204	199
GMOY002173-PA	glycine--tRNA ligase	679	gi|906469947|gb|KNC30571.1|hypothetical protein FF38_11963 [Lucilia cuprina]	KNC30571	0	93.9617	1263.44	679	638
GMOY007806-PA	heat shock gene 67Ba	549	gi|557780954|ref|XP_005190098.1|PREDICTED: enolase-phosphatase E1 [Musca domestica]	XP_005190098	1.21162E-79	68.4615	259.225	260	178
GMOY005190-PA	isoform A	779	gi|755881787|ref|XP_011293511.1|PREDICTED: uncharacterized protein LOC105261979 [Musca domestica]	XP_011293511	0	81.3839	909.442	607	494
GMOY003285-PA	60S ribosomal L7a	271	gi|907646122|ref|XP_013101293.1|PREDICTED: 60S ribosomal protein L7a [Stomoxys calcitrans]	XP_013101293	6.56661E-168	99.1597	470.7	238	236
GMOY007746-PA	Troponin I	346	gi|1184357891|ref|XP_020716787.1|troponin I isoform X6 [Ceratitis capitata]	XP_020716787	9.85983E-60	94.4	196.438	125	118
GMOY010661-PA	Polyadenylate-binding	2462	gi|751459418|ref|XP_011184424.1|PREDICTED: polyadenylate-binding protein [Zeugodacus cucurbitae]gi|751459420|ref|XP_011184425.1|PREDICTED: polyadenylate-binding protein [Zeugodacus cucurbitae]gi|751459422|ref|XP_011184426.1|PREDICTED: polyadenylate-binding protein [Zeugodacus cucurbitae]gi|751459424|ref|XP_011184427.1|PREDICTED: polyadenylate-binding protein [Zeugodacus cucurbitae]	XP_011184424, XP_011184425, XP_011184426, XP_011184427	0	89.41	902.123	661	591
GMOY006595-PA	titin-like isoform X2	2919	gi|906470255|gb|KNC30842.1|hypothetical protein FF38_01558, partial [Lucilia cuprina]	KNC30842	0	78.0447	2862.02	2373	1852
GMOY001811-PA	40S ribosomal S11	196	gi|1098670614|ref|XP_018796801.1|PREDICTED: 40S ribosomal protein S11 isoform X2 [Bactrocera latifrons]	XP_018796801	2.64492E-110	94.5652	318.546	184	174
GMOY009611-PA	barrier-to-autointegration factor	91	gi|557763946|ref|XP_005181683.1|PREDICTED: barrier-to-autointegration factor [Musca domestica]gi|907667480|ref|XP_013103653.1|PREDICTED: barrier-to-autointegration factor [Stomoxys calcitrans]	XP_005181683, XP_013103653	3.85218E-57	96.6292	175.637	89	86
GMOY004022-PA	hypothetical protein FF38_03619	742	gi|906474994|gb|KNC34446.1|hypothetical protein FF38_03619 [Lucilia cuprina]	KNC34446	6.32451E-59	56.8182	196.052	352	200
GMOY000066-PA	circadian clock-controlled	112	gi|195063140|ref|XP_001996319.1|GH25091 [Drosophila grimshawi]gi|193895184|gb|EDV94050.1|GH25091 [Drosophila grimshawi]	XP_001996319, EDV94050	5.82084E-29	67	110.538	100	67
GMOY006258-PA	mitotic apparatus p62	323	gi|1098651203|ref|XP_018790302.1|PREDICTED: uncharacterized protein LOC108969820 [Bactrocera latifrons]	XP_018790302	2.19211E-147	91.5129	422.935	271	248
GMOY010878-PA	muscle M-line assembly unc-89 isoform X2	4177	gi|906472632|gb|KNC32725.1|hypothetical protein FF38_13649, partial [Lucilia cuprina]	KNC32725	0	89.4047	5716.73	3511	3139
GMOY004986-PA	calbindin-32 isoform X1	139	gi|751777506|ref|XP_011197760.1|PREDICTED: calbindin-32 isoform X1 [Bactrocera dorsalis]gi|1098679975|ref|XP_018799499.1|PREDICTED: calbindin-32 isoform X1 [Bactrocera latifrons]gi|1132377667|ref|XP_019844530.1|PREDICTED: calbindin-32 isoform X1 [Bactrocera dorsalis]	XP_011197760, XP_018799499, XP_019844530	9.70531E-54	79.8561	177.178	139	111
GMOY002629-PA	transmembrane 214	654	gi|906469644|gb|KNC30351.1|hypothetical protein FF38_03942 [Lucilia cuprina]	KNC30351	2.574E-172	62.3719	512.301	683	426
GMOY003481-PA	mitochondrial-processing peptidase subunit beta	467	gi|906468725|gb|KNC29683.1|hypothetical protein FF38_05067 [Lucilia cuprina]	KNC29683	0	95.5696	912.909	474	453
GMOY008633-PA	death-associated 1	96	gi|906458490|gb|KNC21685.1|hypothetical protein FF38_09794 [Lucilia cuprina]	KNC21685	1.24213E-51	87.6289	162.54	97	85
GMOY010090-PA	bifunctional purine biosynthesis PURH	574	gi|557770801|ref|XP_005185063.1|PREDICTED: bifunctional purine biosynthesis protein PURH [Musca domestica]	XP_005185063	0	92.0339	1076.62	590	543
GMOY004882-PA	transmembrane emp24 domain-containing 2	207	gi|906462796|gb|KNC24993.1|hypothetical protein FF38_11825 [Lucilia cuprina]	KNC24993	5.17464E-132	90.8213	374.4	207	188
GMOY009818-PA	probable 26S proteasome non-ATPase regulatory subunit 3	501	gi|906459282|gb|KNC22309.1|putative 26S proteasome non-ATPase regulatory subunit 3 [Lucilia cuprina]	KNC22309	0	92.2246	796.193	463	427
GMOY006600-PA	ATP-citrate synthase isoform X1	2913	gi|907625056|ref|XP_013098085.1|PREDICTED: ATP-citrate synthase isoform X3 [Stomoxys calcitrans]	XP_013098085	0	94.0271	2046.94	1105	1039
GMOY008332-PA	60S ribosomal L3 isoform X1	413	gi|40882439|gb|AAR96131.1|RH62603p, partial [Drosophila melanogaster]	AAR96131	0	98.75	783.867	400	395
GMOY004689-PA	methenyltetrahydrofolate synthase domain-containing	460	gi|1048041163|ref|XP_017477477.1|PREDICTED: methenyltetrahydrofolate synthase domain-containing protein [Rhagoletis zephyria]	XP_017477477	4.93672E-168	76.7896	488.804	461	354
GMOY013290-PA	peroxiredoxin-2	236	gi|50897513|gb|AAT85819.1|putative thioredoxin peroxidase 3 [Glossina morsitans morsitans]	AAT85819	5.7344E-149	97.4576	419.853	236	230
GMOY010191-PA	probable phosphomannomutase	253	gi|907739479|ref|XP_013116069.1|PREDICTED: probable phosphomannomutase [Stomoxys calcitrans]	XP_013116069	5.25422E-156	92.0949	439.113	253	233
GMOY006100-PA	laminin subunit alpha	3733	gi|557757749|ref|XP_005178606.1|PREDICTED: laminin subunit alpha [Musca domestica]	XP_005178606	0	87.7578	5996.77	3733	3276
GMOY013265-PA	40S ribosomal S2	271	gi|557767072|ref|XP_005183227.1|PREDICTED: 40S ribosomal protein S2 [Musca domestica]	XP_005183227	9.35806E-152	99.1379	429.483	232	230
GMOY004921-PA	Proteasome subunit beta type-1	236	gi|906460091|gb|KNC22929.1|Proteasome subunit beta type-1 [Lucilia cuprina]	KNC22929	9.8988E-145	89.8305	409.068	236	212
GMOY009174-PA	fasciclin-3 isoform X4	837	gi|907724994|ref|XP_013113674.1|PREDICTED: fasciclin-3 isoform X5 [Stomoxys calcitrans]	XP_013113674	0	83.4043	668.307	470	392
GMOY009228-PA	ribosomal S26	167	gi|1135105665|ref|XP_005181939.2|PREDICTED: 40S ribosomal protein S26 [Musca domestica]	XP_005181939	1.69102E-77	85.5072	232.261	138	118
GMOY006191-PA	aldose reductase-like	584	gi|998493385|ref|XP_015514291.1|PREDICTED: uncharacterized protein LOC107220274 [Neodiprion lecontei]	XP_015514291	0	62.599	538.88	631	395
GMOY006073-PA	Homogentisate 1,2-dioxygenase	436	gi|906463282|gb|KNC25382.1|Homogentisate 1,2-dioxygenase [Lucilia cuprina]	KNC25382	0	92.6941	805.053	438	406
GMOY011877-PA	pickpocket 19	427	gi|1037023441|ref|XP_017139487.1|PREDICTED: uncharacterized protein LOC108153900 [Drosophila miranda]	XP_017139487	1.92411E-104	59.1324	323.553	438	259
GMOY005771-PA	Gmfb8	211	gi|19168450|gb|AAL83358.1|Gmfb8 [Glossina morsitans morsitans]	AAL83358	6.15992E-40	62.6316	141.354	190	119
GMOY007770-PA	kinase C and casein kinase substrate in neurons 1 isoform X2	667	gi|557754881|ref|XP_005177183.1|PREDICTED: protein kinase C and casein kinase substrate in neurons protein 1 [Musca domestica]gi|557754883|ref|XP_005177184.1|PREDICTED: protein kinase C and casein kinase substrate in neurons protein 1 [Musca domestica]gi|557754887|ref|XP_005177186.1|PREDICTED: protein kinase C and casein kinase substrate in neurons protein 1 [Musca domestica]gi|557754889|ref|XP_0…	XP_005177183, XP_005177184, XP_005177186, XP_005177187, XP_005177188	0	92.827	821.231	474	440
GMOY013287-PA	angiotensin-converting enzyme-related	624	gi|907672516|ref|XP_013104590.1|PREDICTED: angiotensin-converting enzyme-related protein [Stomoxys calcitrans]	XP_013104590	0	79.7753	880.167	623	497
GMOY002603-PA	dnaJ homolog subfamily C member 16	1122	gi|906464541|gb|KNC26355.1|hypothetical protein FF38_01789 [Lucilia cuprina]	KNC26355	0	85.1064	1067.76	752	640
GMOY003590-PA	collagen alpha-1(IV) chain	2272	gi|557773538|ref|XP_005186422.1|PREDICTED: collagen alpha-1(IV) chain [Musca domestica]	XP_005186422	0	81.5775	1630.15	1775	1448
GMOY002729-PA	proclotting enzyme	1022	gi|906468632|gb|KNC29607.1|hypothetical protein FF38_10443, partial [Lucilia cuprina]	KNC29607	0	67.8144	716.457	668	453
GMOY008354-PA	hornerin isoform X2	289	gi|907651858|ref|XP_013102235.1|PREDICTED: homeobox protein 2 [Stomoxys calcitrans]	XP_013102235	0	98.6159	600.127	289	285
GMOY001529-PA	acyl- thioesterase 1	217	gi|557785215|ref|XP_005192208.1|PREDICTED: acyl-protein thioesterase 1 [Musca domestica]	XP_005192208	2.62349E-135	91.2442	383.645	217	198
GMOY011246-PA	heat shock 70 kDa 4 isoform X1	835	gi|906469477|gb|KNC30240.1|hypothetical protein FF38_06999 [Lucilia cuprina]	KNC30240	0	88.2701	1334.32	844	745
GMOY004902-PA	3-hydroxyisobutyryl- mitochondrial isoform X1	376	gi|907739931|ref|XP_013116225.1|PREDICTED: 3-hydroxyisobutyryl-CoA hydrolase, mitochondrial isoform X3 [Stomoxys calcitrans]	XP_013116225	0	93.0667	671.774	375	349
GMOY002883-PA	probable elongation factor 1-beta	222	gi|195380471|ref|XP_002048994.1|uncharacterized protein Dvir_GJ21006 [Drosophila virilis]gi|194143791|gb|EDW60187.1|uncharacterized protein Dvir_GJ21006 [Drosophila virilis]	XP_002048994, EDW60187	1.95546E-115	88.2883	333.954	222	196
GMOY013284-PA	Proteasome subunit alpha type-1	284	gi|906468641|gb|KNC29612.1|Proteasome subunit alpha type-1 [Lucilia cuprina]	KNC29612	1.10312E-156	89.5105	443.351	286	256
GMOY006487-PA	rap guanine nucleotide exchange factor 2 isoform X1	1500	gi|906470418|gb|KNC30980.1|hypothetical protein FF38_12022 [Lucilia cuprina]	KNC30980	0	87.1319	2304.25	1562	1361
GMOY004361-PA	glutathione S-transferase 1-like	813	gi|906468193|gb|KNC29243.1|hypothetical protein FF38_02363 [Lucilia cuprina]	KNC29243	0	70.6009	534.643	466	329
GMOY005825-PA	microtubule-associated futsch	2103	gi|557765562|ref|XP_005182480.1|PREDICTED: uncharacterized protein LOC101888303 [Musca domestica]	XP_005182480	8.86251E-105	61.6525	383.645	472	291
GMOY000477-PA	COPII coat assembly sec16 isoform X1	1720	gi|907601648|ref|XP_013104865.1|PREDICTED: uncharacterized protein LOC106085249 isoform X2 [Stomoxys calcitrans]	XP_013104865	0	73.0047	941.799	852	622
GMOY002442-PA	serine protease inhibitor	425	gi|83595257|gb|ABC25080.1|serine protease inhibitor [Glossina morsitans morsitans]	ABC25080	0	99.7647	827.395	425	424
GMOY008418-PA	flocculation FLO11	1428	gi|906474542|gb|KNC34093.1|hypothetical protein FF38_06458, partial [Lucilia cuprina]	KNC34093	0	58.7476	893.649	1549	910
GMOY004926-PA	fatty acid synthase	2412	gi|906459943|gb|KNC22821.1|hypothetical protein FF38_08018, partial [Lucilia cuprina]	KNC22821	0	87.2367	3852.37	2421	2112
GMOY002487-PA	tubulin beta-1 chain	444	gi|906473232|gb|KNC33181.1|Tubulin beta-2 chain [Lucilia cuprina]	KNC33181	0	99.2958	809.675	426	423
GMOY011846-PA	tubulin beta-1 chain	902	gi|906473232|gb|KNC33181.1|Tubulin beta-2 chain [Lucilia cuprina]	KNC33181	0	96.1276	844.343	439	422
GMOY004931-PA	CUB and LDLa isoform A	1391	gi|906475331|gb|KNC34716.1|hypothetical protein FF38_09152 [Lucilia cuprina]	KNC34716	0	75.3582	1271.91	1047	789
GMOY005920-PA	Tubulin alpha-4 chain	459	gi|906469689|gb|KNC30389.1|Tubulin alpha-4 chain [Lucilia cuprina]	KNC30389	0	94.6121	806.594	464	439
GMOY009852-PA	pyruvate mitochondrial isoform X1	549	gi|907648188|ref|XP_013101692.1|PREDICTED: pyruvate carboxylase, mitochondrial isoform X1 [Stomoxys calcitrans]	XP_013101692	0	97.6321	1004.59	549	536
GMOY004953-PA	phosphoribosylformylglycinamidine synthase	1148	gi|907707364|ref|XP_013110668.1|PREDICTED: phosphoribosylformylglycinamidine synthase [Stomoxys calcitrans]	XP_013110668	0	88.4342	1814.66	1124	994
GMOY009322-PA	glyceraldehyde-3-phosphate dehydrogenase	344	gi|1036055124|ref|XP_016930518.1|PREDICTED: glyceraldehyde-3-phosphate dehydrogenase [Drosophila suzukii]	XP_016930518	9.00812E-131	74.3671	382.874	316	235
GMOY006294-PA	delta-1-pyrroline-5-carboxylate synthase	760	gi|907742752|ref|XP_013116590.1|PREDICTED: delta-1-pyrroline-5-carboxylate synthase [Stomoxys calcitrans]	XP_013116590	0	93.8303	1431.39	778	730
GMOY011568-PA	heat shock 68	318	gi|1036068473|ref|XP_016937787.1|PREDICTED: heat shock protein 68 [Drosophila suzukii]	XP_016937787	8.82865E-141	72.4518	413.305	363	263
GMOY007649-PA	transmembrane protease serine 9-like	1220	gi|906473923|gb|KNC33625.1|hypothetical protein FF38_08769 [Lucilia cuprina]	KNC33625	0	68.1392	769.229	747	509
GMOY006839-PA	trypsin-like	274	gi|9651986|gb|AAF91346.1|trypsin-like serine protease precursor [Glossina morsitans morsitans]	AAF91346	7.19879E-145	85.8824	411.764	255	219
GMOY006838-PA	transmembrane protease serine 9-like	753	gi|906473923|gb|KNC33625.1|hypothetical protein FF38_08769 [Lucilia cuprina]	KNC33625	0	72.0159	854.744	754	543
GMOY003727-PA	serine cytosolic isoform X2	302	gi|1108481028|emb|CRK91127.1|CLUMA_CG004814, isoform A [Clunio marinus]	CRK91127	6.7944E-107	68.9769	322.783	303	209
GMOY003968-PA	probable citrate mitochondrial	462	gi|122092322|sp|Q0QHL3.1|CISY_GLOMMRecName: Full=Probable citrate synthase, mitochondrial; Flags: Precursorgi|110611270|gb|ABG77984.1|ATP citrate synthase [Glossina morsitans morsitans]	Q0QHL3, ABG77984	0	100	932.169	449	449
GMOY007442-PA	probable citrate mitochondrial	465	gi|122092322|sp|Q0QHL3.1|CISY_GLOMMRecName: Full=Probable citrate synthase, mitochondrial; Flags: Precursorgi|110611270|gb|ABG77984.1|ATP citrate synthase [Glossina morsitans morsitans]	Q0QHL3, ABG77984	0	93.9914	833.558	466	438
GMOY005875-PA	---NA---	131	No Blast Hit
GMOY012131-PA	aldehyde dehydrogenase family 7 member A1 homolog	546	gi|906470331|gb|KNC30909.1|hypothetical protein FF38_09284 [Lucilia cuprina]	KNC30909	0	92.674	921.383	546	506
GMOY006971-PA	aldose reductase-like	282	gi|906466429|gb|KNC27853.1|hypothetical protein FF38_03437 [Lucilia cuprina]	KNC27853	9.86015E-121	77.2059	354.369	272	210
GMOY002461-PA	adenylosuccinate lyase	483	gi|906475392|gb|KNC34766.1|hypothetical protein FF38_01970 [Lucilia cuprina]	KNC34766	0	93.3194	813.527	479	447
GMOY001312-PA	mucin-5AC isoform X2	507	gi|906457223|gb|KNC20706.1|hypothetical protein FF38_07731, partial [Lucilia cuprina]	KNC20706	3.93442E-42	62.069	150.599	145	90
GMOY010659-PA	WD and tetratricopeptide repeats 1	656	gi|557757434|ref|XP_005178450.1|PREDICTED: WD and tetratricopeptide repeats protein 1 [Musca domestica]	XP_005178450	0	80.4348	932.169	644	518
GMOY004506-PA	---NA---	231	No Blast Hit
GMOY003774-PA	PREDICTED: uncharacterized protein LOC101896090	102	gi|755888020|ref|XP_005188180.2|PREDICTED: uncharacterized protein LOC101896090 [Musca domestica]	XP_005188180	5.52665E-25	70.7317	98.9821	82	58
GMOY005237-PA	uncharacterized protein Dvir_GJ19996	102	gi|968106589|ref|XP_002052759.2|uncharacterized protein Dvir_GJ19996 [Drosophila virilis]gi|946564539|gb|EDW64914.2|uncharacterized protein Dvir_GJ19996 [Drosophila virilis]	XP_002052759, EDW64914	1.18395E-29	67.0588	95.9005	85	57
GMOY009814-PA	L-lactate dehydrogenase	418	gi|906474708|gb|KNC34223.1|L-lactate dehydrogenase [Lucilia cuprina]	KNC34223	0	96.0843	632.484	332	319
GMOY013288-PA	Angiotensin-converting enzyme	735	gi|906457818|gb|KNC21161.1|Angiotensin-converting enzyme [Lucilia cuprina]	KNC21161	0	93.1373	1099.35	612	570
GMOY009906-PA	V-type proton ATPase subunit H isoform X2	471	gi|907735392|ref|XP_013115408.1|PREDICTED: V-type proton ATPase subunit H [Stomoxys calcitrans]	XP_013115408	0	95.1168	875.544	471	448
GMOY005535-PA	alcohol dehydrogenase [NADP(+)]	324	gi|557772851|ref|XP_005186080.1|PREDICTED: alcohol dehydrogenase [NADP(+)] [Musca domestica]	XP_005186080	0	90.3727	542.347	322	291
GMOY008539-PA	alcohol dehydrogenase [NADP(+)]	326	gi|907748948|ref|XP_013117744.1|PREDICTED: alcohol dehydrogenase [NADP(+)]-like [Stomoxys calcitrans]	XP_013117744	7.13274E-167	82.0189	463.381	317	260
GMOY005527-PA	C-1-tetrahydrofolate cytoplasmic isoform X1	911	gi|557768041|ref|XP_005183706.1|PREDICTED: C-1-tetrahydrofolate synthase, cytoplasmic isoform X3 [Musca domestica]gi|1135079896|ref|XP_019892344.1|PREDICTED: C-1-tetrahydrofolate synthase, cytoplasmic isoform X3 [Musca domestica]	XP_005183706, XP_019892344	0	89.4004	1555.42	934	835
GMOY003366-PA	C-1-tetrahydrofolate cytoplasmic isoform X1	668	gi|557768041|ref|XP_005183706.1|PREDICTED: C-1-tetrahydrofolate synthase, cytoplasmic isoform X3 [Musca domestica]gi|1135079896|ref|XP_019892344.1|PREDICTED: C-1-tetrahydrofolate synthase, cytoplasmic isoform X3 [Musca domestica]	XP_005183706, XP_019892344	0	88.2263	1016.53	654	577
GMOY007296-PA	2-oxoglutarate mitochondrial isoform X4	1210	gi|1135089189|ref|XP_019894314.1|PREDICTED: 2-oxoglutarate dehydrogenase-like, mitochondrial [Musca domestica]	XP_019894314	0	83.3729	1289.63	842	702
GMOY007346-PA	electron transfer flavo subunit beta	253	gi|1048045712|ref|XP_017494345.1|PREDICTED: electron transfer flavoprotein subunit beta-like isoform X1 [Rhagoletis zephyria]gi|1048045714|ref|XP_017494346.1|PREDICTED: electron transfer flavoprotein subunit beta-like isoform X2 [Rhagoletis zephyria]gi|1048045716|ref|XP_017494348.1|PREDICTED: electron transfer flavoprotein subunit beta-like isoform X1 [Rhagoletis zephyria]	XP_017494345, XP_017494346, XP_017494348	1.30546E-158	98.0237	445.662	253	248
GMOY002568-PA	glycine dehydrogenase (decarboxylating) mitochondrial	999	gi|906470097|gb|KNC30715.1|hypothetical protein FF38_11750 [Lucilia cuprina]	KNC30715	0	95.356	1762.27	969	924
GMOY004363-PA	coronin-6 isoform X1	542	gi|906462910|gb|KNC25098.1|hypothetical protein FF38_07810 [Lucilia cuprina]	KNC25098	0	92.5182	954.51	548	507
GMOY007667-PA	probable 3-hydroxyisobutyrate mitochondrial	373	gi|557781710|ref|XP_005190473.1|PREDICTED: probable 3-hydroxyisobutyrate dehydrogenase, mitochondrial [Musca domestica]	XP_005190473	0	87.3846	515.383	325	284
GMOY004864-PA	thioredoxin reductase mitochondrial isoform X2	504	gi|906457583|gb|KNC20998.1|Thioredoxin reductase 1, mitochondrial [Lucilia cuprina]	KNC20998	0	92.562	857.44	484	448
GMOY002000-PA	glutathione S-transferase D1	250	gi|836552892|gb|AKM70872.1|glutathione S-transferases 1-1 [Lucilia sericata]	AKM70872	1.488E-128	95.6731	367.466	208	199
GMOY002550-PA	deoxyribonuclease-2-alpha	368	gi|906474550|gb|KNC34101.1|hypothetical protein FF38_06465 [Lucilia cuprina]	KNC34101	2.82492E-136	71.8663	398.282	359	258
GMOY008344-PA	chymotrypsin inhibitor-like	87	gi|21311570|gb|AAM46785.1|AF368912_1immune reactive putative protease inhibitor PrInh6, partial [Glossina morsitans morsitans]	AAM46785	2.89277E-46	100	139.043	69	69
GMOY003296-PA	Trifunctional purine biosynthetic adenosine-3	1297	gi|906461559|gb|KNC24022.1|Trifunctional purine biosynthetic protein adenosine-3 [Lucilia cuprina]	KNC24022	0	82.7051	1821.59	1353	1119
GMOY009102-PA	12 kDa FK506-binding	108	gi|195426868|ref|XP_002061513.1|uncharacterized protein Dwil_GK20673 [Drosophila willistoni]gi|194157598|gb|EDW72499.1|uncharacterized protein Dwil_GK20673 [Drosophila willistoni]	XP_002061513, EDW72499	7.15491E-73	99.0741	216.853	108	107
GMOY005874-PA	---NA---	135	No Blast Hit
GMOY012128-PA	adenosylhomocysteinase	432	gi|907599471|ref|XP_013099721.1|PREDICTED: adenosylhomocysteinase [Stomoxys calcitrans]gi|907599474|ref|XP_013099729.1|PREDICTED: adenosylhomocysteinase [Stomoxys calcitrans]	XP_013099721, XP_013099729	0	94.9074	776.933	432	410
GMOY001850-PA	lactoylglutathione lyase	179	gi|906475194|gb|KNC34608.1|hypothetical protein FF38_09345 [Lucilia cuprina]	KNC34608	1.65537E-118	91.573	326.25	178	163
GMOY012237-PA	---NA---	138	No Blast Hit
GMOY011763-PA	cystathionine gamma-lyase	381	gi|906469786|gb|KNC30451.1|hypothetical protein FF38_02166 [Lucilia cuprina]	KNC30451	0	89.8477	675.241	394	354
GMOY013306-PA	Gmfb8	208	gi|19168450|gb|AAL83358.1|Gmfb8 [Glossina morsitans morsitans]	AAL83358	6.32045E-56	67.9558	182.185	181	123
GMOY000899-PA	AF368910_1immune responsive product	159	gi|18201667|gb|AAL65402.1|AF368910_1immune responsive product Fb49, partial [Glossina morsitans morsitans]	AAL65402	2.10912E-108	98.7421	311.227	159	157
GMOY003121-PA	secernin-3	356	gi|906461957|gb|KNC24343.1|hypothetical protein FF38_04592 [Lucilia cuprina]	KNC24343	0	87.395	518.079	357	312
GMOY008371-PA	enoyl- delta isomerase mitochondrial	285	gi|906471416|gb|KNC31757.1|hypothetical protein FF38_10244, partial [Lucilia cuprina]	KNC31757	9.07746E-143	88.5057	408.297	261	231
GMOY012179-PA	acetyl- mitochondrial	410	gi|557760515|ref|XP_005179978.1|PREDICTED: acetyl-CoA acetyltransferase, mitochondrial [Musca domestica]	XP_005179978	0	96.134	735.717	388	373
GMOY005336-PA	mitochondrial-processing peptidase subunit beta	463	gi|906468725|gb|KNC29683.1|hypothetical protein FF38_05067 [Lucilia cuprina]	KNC29683	0	95.1477	897.116	474	451
GMOY005979-PA	cystathionine beta-synthase	439	gi|1135083732|ref|XP_019893193.1|PREDICTED: cystathionine beta-synthase [Musca domestica]	XP_019893193	0	91.8269	689.108	416	382
GMOY012105-PA	PREDICTED: uncharacterized protein LOC101898731 isoform X2	1655	gi|755888441|ref|XP_011294486.1|PREDICTED: uncharacterized protein LOC101898731 isoform X2 [Musca domestica]	XP_011294486	0	80.3977	1171.76	1056	849
GMOY007591-PA	26S protease regulatory subunit 8	404	gi|906465213|gb|KNC26905.1|26S protease regulatory subunit 8 [Lucilia cuprina]	KNC26905	0	99.7525	721.465	404	403
GMOY001006-PA	uroporphyrinogen decarboxylase isoform X1	355	gi|906458448|gb|KNC21643.1|Uroporphyrinogen decarboxylase [Lucilia cuprina]	KNC21643	0	90.9091	620.157	352	320
GMOY006775-PA	probable phosphoserine aminotransferase	364	gi|906470130|gb|KNC30748.1|putative phosphoserine aminotransferase [Lucilia cuprina]	KNC30748	0	91.7582	638.262	364	334
GMOY003041-PA	coatomer subunit delta	521	gi|907672594|ref|XP_013104619.1|PREDICTED: coatomer subunit delta [Stomoxys calcitrans]	XP_013104619	0	88.381	879.396	525	464
GMOY009727-PA	26S protease regulatory subunit 7	715	gi|924556753|gb|ALC42026.1|CG17985 [Drosophila busckii]	ALC42026	0	84.2022	861.677	633	533
GMOY004319-PA	---NA---	492	No Blast Hit
GMOY001137-PA	mitochondrial	420	gi|906474421|gb|KNC34013.1|hypothetical protein FF38_10876 [Lucilia cuprina]	KNC34013	0	83.693	620.157	417	349
GMOY012007-PA	leukocyte elastase inhibitor	376	gi|381392368|gb|AFG28184.1|Serp2 [Glossina morsitans morsitans]	AFG28184	0	100	781.556	376	376
GMOY007314-PA	odorant binding	138	gi|281426829|emb|CBA11321.1|odorant binding protein 17, partial [Glossina morsitans morsitans]	CBA11321	6.56898E-6	53.5211	47.7506	71	38
GMOY000899-PB	AF368910_1immune responsive product	160	gi|18201667|gb|AAL65402.1|AF368910_1immune responsive product Fb49, partial [Glossina morsitans morsitans]	AAL65402	2.6834E-69	86.875	212.616	160	139
GMOY000851-PA	mannose-6-phosphate isomerase	390	gi|557751314|ref|XP_005175413.1|PREDICTED: mannose-6-phosphate isomerase [Musca domestica]	XP_005175413	1.0306E-158	74.8092	456.833	393	294
GMOY005110-PA	glucose phosphate	79	gi|751792736|ref|XP_011206027.1|PREDICTED: glucose-6-phosphate isomerase [Bactrocera dorsalis]	XP_011206027	6.08653E-29	83.3333	112.849	72	60
GMOY002513-PA	aldehyde dehydrogenase	983	gi|110611284|gb|ABG77991.1|1-pyrroline-5-carboxylate dehydrogenase 2 [Glossina morsitans morsitans]	ABG77991	0	97.2222	1080.86	540	525
GMOY000487-PA	probable GDP-L-fucose synthase	321	gi|906468577|gb|KNC29568.1|putative GDP-L-fucose synthase [Lucilia cuprina]	KNC29568	0	89.2508	516.538	307	274
GMOY003037-PA	Amidophosphoribosyltransferase	461	gi|907749717|ref|XP_013117845.1|PREDICTED: amidophosphoribosyltransferase-like isoform X1 [Stomoxys calcitrans]	XP_013117845	0	90.2386	813.913	461	416
GMOY013229-PA	Gmfb8	205	gi|19168450|gb|AAL83358.1|Gmfb8 [Glossina morsitans morsitans]	AAL83358	2.05463E-36	60.733	132.109	191	116
GMOY013092-PA	bifunctional methylenetetrahydrofolate dehydrogenase mitochondrial isoform X3	300	gi|557757888|ref|XP_005178674.1|PREDICTED: bifunctional methylenetetrahydrofolate dehydrogenase/cyclohydrolase, mitochondrial isoform X3 [Musca domestica]	XP_005178674	0	88.9262	498.049	298	265
GMOY005029-PA	serine protease persephone-like isoform X4	406	gi|907616351|ref|XP_013119056.1|PREDICTED: uncharacterized protein LOC106096061 [Stomoxys calcitrans]gi|907616357|ref|XP_013119057.1|PREDICTED: uncharacterized protein LOC106096061 [Stomoxys calcitrans]gi|907616362|ref|XP_013119058.1|PREDICTED: uncharacterized protein LOC106096061 [Stomoxys calcitrans]	XP_013119056, XP_013119057, XP_013119058	3.19857E-116	76.5343	361.303	277	212
GMOY004505-PA	---NA---	498	No Blast Hit
GMOY011777-PA	CG14645, partial	108	gi|924561205|gb|ALC45863.1|CG14645, partial [Drosophila busckii]	ALC45863	2.87555E-30	78.3784	108.997	74	58
GMOY007954-PA	phosphoglycerate mutase 1	303	gi|924561752|gb|ALC46410.1|CG7059 [Drosophila busckii]	ALC46410	1.74786E-157	89.1892	446.047	259	231
GMOY001297-PA	Pgd-RA	481	gi|906465366|gb|KNC27035.1|hypothetical protein FF38_02311 [Lucilia cuprina]	KNC27035	0	93.3472	855.899	481	449
GMOY007256-PA	Multifunctional ADE2	424	gi|906460287|gb|KNC23080.1|Multifunctional protein ADE2 [Lucilia cuprina]	KNC23080	0	93.617	778.089	423	396
GMOY002279-PA	male accessory gland serine protease inhibitor-like	122	gi|557765967|ref|XP_005182681.1|PREDICTED: male accessory gland serine protease inhibitor [Musca domestica]	XP_005182681	1.89198E-12	58.3333	63.5438	84	49
GMOY001187-PA	CRAL-TRIO domain-containing	224	gi|906470573|gb|KNC31077.1|hypothetical protein FF38_02621 [Lucilia cuprina]	KNC31077	2.69157E-139	92.4107	394.43	224	207
GMOY008469-PA	membrane metallo-endopeptidase-like 1	690	gi|906462813|gb|KNC25010.1|hypothetical protein FF38_11936 [Lucilia cuprina]	KNC25010	0	70.3488	744.191	688	484
GMOY013055-PA	AF368910_1immune responsive product	158	gi|18201667|gb|AAL65402.1|AF368910_1immune responsive product Fb49, partial [Glossina morsitans morsitans]	AAL65402	2.96586E-70	84.1772	214.927	158	133
GMOY005312-PA	aspartate mitochondrial	806	gi|906465784|gb|KNC27366.1|Phosphoglycerate kinase [Lucilia cuprina]	KNC27366	0	78.9127	880.552	607	479
GMOY011932-PA	GPI mannosyltransferase 3	887	gi|906469281|gb|KNC30095.1|GPI mannosyltransferase 3 [Lucilia cuprina]	KNC30095	0	81.3051	791.186	567	461
GMOY007176-PA	succinyl- ligase [ADP GDP-forming] subunit mitochondrial	351	gi|557755314|ref|XP_005177397.1|PREDICTED: succinate--CoA ligase [ADP/GDP-forming] subunit alpha, mitochondrial [Musca domestica]	XP_005177397	7.51419E-160	84.6821	456.447	346	293
GMOY009344-PA	hydroxysteroid dehydrogenase 2	701	gi|906475151|gb|KNC34565.1|hypothetical protein FF38_09370 [Lucilia cuprina]	KNC34565	0	87.8641	641.343	412	362
GMOY003309-PA	omega-amidase NIT2-like	640	gi|906472240|gb|KNC32399.1|hypothetical protein FF38_04958 [Lucilia cuprina]	KNC32399	2.55766E-162	88.6525	462.225	282	250
GMOY012026-PA	purine nucleoside phosphorylase isoform X2	319	gi|557758649|ref|XP_005179051.1|PREDICTED: purine nucleoside phosphorylase isoform X3 [Musca domestica]	XP_005179051	0	88.5093	531.946	322	285
GMOY006948-PA	spermine oxidase	779	gi|557782259|ref|XP_005190744.1|PREDICTED: spermine oxidase [Musca domestica]	XP_005190744	0	78.8584	563.533	473	373
GMOY002452-PA	coatomer subunit alpha	1231	gi|557778840|ref|XP_005189048.1|PREDICTED: coatomer subunit alpha [Musca domestica]	XP_005189048	0	95.7015	2221.05	1233	1180
GMOY008378-PA	glutamate mitochondrial isoform X1	60	gi|906459601|gb|KNC22546.1|Glutamate dehydrogenase, mitochondrial [Lucilia cuprina]	KNC22546	1.79909E-31	96.6667	119.013	60	58
GMOY002825-PA	General odorant-binding 99b	153	gi|281426799|emb|CBA11306.1|odorant binding protein 2 [Glossina morsitans morsitans]	CBA11306	2.27394E-102	100	295.049	153	153
GMOY002048-PA	bone morphogenetic receptor type-2	1465	gi|755862676|ref|XP_011290781.1|PREDICTED: bone morphogenetic protein receptor type-2 [Musca domestica]	XP_011290781	0	76.2475	1210.28	1002	764
GMOY007195-PA	glycerol-3-phosphate phosphatase-like	1111	gi|906472534|gb|KNC32657.1|hypothetical protein FF38_13211 [Lucilia cuprina]	KNC32657	0	70.3088	918.687	842	592
GMOY010190-PA	melanotransferrin	1810	gi|557763990|ref|XP_005181705.1|PREDICTED: melanotransferrin [Musca domestica]	XP_005181705	0	88.6744	1323.53	777	689
GMOY005309-PA	serine protease SP24D-like	488	gi|1184338070|ref|XP_020718158.1|transmembrane protease serine 3 [Ceratitis capitata]	XP_020718158	0	71.374	603.208	524	374
GMOY004027-PA	aspartate cytoplasmic	386	gi|907732557|ref|XP_013114725.1|PREDICTED: aspartate aminotransferase, cytoplasmic isoform X2 [Stomoxys calcitrans]	XP_013114725	0	87.0647	666.381	402	350
GMOY003183-PA	flavin reductase (NADPH)	202	gi|906462823|gb|KNC25020.1|hypothetical protein FF38_11915 [Lucilia cuprina]	KNC25020	1.01954E-124	91.5842	355.525	202	185
GMOY004726-PA	male accessory gland serine protease inhibitor-like	85	gi|1036863261|ref|XP_016956935.1|PREDICTED: male accessory gland serine protease inhibitor [Drosophila biarmipes]	XP_016956935	1.178E-23	80.9524	90.5077	63	51
GMOY002418-PA	probable isocitrate dehydrogenase [NAD] subunit mitochondrial isoform X1	262	gi|929371941|ref|XP_014095910.1|PREDICTED: probable isocitrate dehydrogenase [NAD] subunit alpha, mitochondrial isoform X1 [Bactrocera oleae]	XP_014095910	0	97.7099	522.316	262	256
GMOY010365-PA	very long-chain specific acyl- mitochondrial	625	gi|906472459|gb|KNC32597.1|hypothetical protein FF38_13110, partial [Lucilia cuprina]	KNC32597	0	89.5833	1048.88	624	559
GMOY004809-PA	3-oxoacyl-[acyl-carrier- ] reductase 1-like	256	gi|906475076|gb|KNC34518.1|hypothetical protein FF38_10302 [Lucilia cuprina]	KNC34518	8.4716E-153	92.5781	422.165	256	237
GMOY009733-PA	27 kDa hemolymph	33	gi|1036045259|ref|XP_016925208.1|PREDICTED: 27 kDa hemolymph protein [Drosophila suzukii]	XP_016925208	1.97133E-8	84.8485	52.373	33	28
GMOY008552-PA	hypothetical protein FF38_08530	265	gi|906469075|gb|KNC29958.1|hypothetical protein FF38_08530 [Lucilia cuprina]	KNC29958	2.72178E-56	57.5646	200.675	271	156
GMOY001290-PA	proteasome subunit alpha type-7-1	248	gi|907689681|ref|XP_013107848.1|PREDICTED: proteasome subunit alpha type-7-1 [Stomoxys calcitrans]	XP_013107848	4.46253E-161	95.671	451.44	231	221
GMOY000930-PA	serine protease inhibitor 77Ba	447	gi|83595255|gb|ABC25079.1|serine protease inhibitor [Glossina morsitans morsitans]	ABC25079	0	99.768	820.846	431	430
GMOY006685-PA	glutathione S-transferase 1	229	gi|557769982|ref|XP_005184662.1|PREDICTED: glutathione S-transferase 1 [Musca domestica]gi|557769984|ref|XP_005184663.1|PREDICTED: glutathione S-transferase 1 [Musca domestica]	XP_005184662, XP_005184663	5.95023E-142	89.9563	392.119	229	206
GMOY006776-PA	Guanosine-3 ,5 -bis(diphosphate) 3 -pyrophosphohydrolase MESH1	177	gi|906470043|gb|KNC30661.1|Guanosine-3',5'-bis(diphosphate) 3'-pyrophosphohydrolase MESH1 [Lucilia cuprina]	KNC30661	1.429E-78	84.7458	236.884	177	150
GMOY000946-PA	gamma-glutamyl hydrolase isoform X1	326	gi|557766326|ref|XP_005182858.1|PREDICTED: gamma-glutamyl hydrolase [Musca domestica]	XP_005182858	5.08009E-115	69.0184	341.658	326	225
GMOY010377-PA	-L-isoaspartate(D-aspartate) O-methyltransferase	234	gi|907615972|ref|XP_013119016.1|PREDICTED: protein-L-isoaspartate(D-aspartate) O-methyltransferase [Stomoxys calcitrans]	XP_013119016	3.30087E-107	83.3333	313.538	222	185
GMOY011770-PA	3-hydroxyacyl- dehydrogenase type-2	255	gi|557768944|ref|XP_005184147.1|PREDICTED: 3-hydroxyacyl-CoA dehydrogenase type-2 [Musca domestica]	XP_005184147	1.24454E-180	97.6471	492.656	255	249
GMOY004822-PA	vesicle-fusing ATPase 1	758	gi|906463887|gb|KNC25860.1|Vesicle-fusing ATPase 1, partial [Lucilia cuprina]	KNC25860	0	95.2318	1393.25	755	719
GMOY011477-PA	alcohol dehydrogenase class-3	380	gi|557776994|ref|XP_005188133.1|PREDICTED: alcohol dehydrogenase class-3 [Musca domestica]	XP_005188133	0	93.883	659.062	376	353
GMOY004675-PA	pyrimidodiazepine synthase	262	gi|929047273|gb|ALF04577.1|glutathione S-transferase omega 1 [Delia antiqua]	ALF04577	4.0734E-150	89.3281	424.476	253	226
GMOY006432-PA	phosphoglucomutase-2	613	gi|557781763|ref|XP_005190499.1|PREDICTED: phosphoglucomutase-2 [Musca domestica]	XP_005190499	0	88.5808	1019.61	613	543
GMOY003955-PA	acetyl- carboxylase isoform X1	2472	gi|906473811|gb|KNC33542.1|hypothetical protein FF38_03825 [Lucilia cuprina]	KNC33542	0	95.7522	4222.54	2260	2164
GMOY011331-PA	importin-5	1103	gi|557757180|ref|XP_005178323.1|PREDICTED: importin-5 [Musca domestica]	XP_005178323	0	94.4696	1974.52	1103	1042
GMOY001002-PA	ras-related Rab-43	303	gi|907745122|ref|XP_013117187.1|PREDICTED: ras-related protein Rab-43 [Stomoxys calcitrans]	XP_013117187	2.00129E-91	76.699	276.174	206	158
GMOY004724-PA	male accessory gland serine protease inhibitor-like	83	gi|968082234|ref|XP_015033935.1|uncharacterized protein Dwil_GK27380 [Drosophila willistoni]gi|946582402|gb|KRF98458.1|uncharacterized protein Dwil_GK27380 [Drosophila willistoni]	XP_015033935, KRF98458	1.08095E-7	51.2821	50.0618	78	40
GMOY009777-PA	---NA---	157	No Blast Hit
GMOY006029-PA	ubiquitin carboxyl-terminal hydrolase	227	gi|907663506|ref|XP_013103018.1|PREDICTED: ubiquitin carboxyl-terminal hydrolase [Stomoxys calcitrans]	XP_013103018	1.22853E-128	86.2222	367.466	225	194
GMOY008261-PA	hydroxymethylglutaryl- mitochondrial	325	gi|906459164|gb|KNC22226.1|hypothetical protein FF38_01863 [Lucilia cuprina]	KNC22226	0	91.0256	529.25	312	284
GMOY006959-PA	venom carboxylesterase-6-like	539	gi|659105774|gb|AID61342.1|esterase [Calliphora stygia]	AID61342	0	76.938	707.212	516	397
GMOY008723-PA	ebony	909	gi|906471186|gb|KNC31583.1|hypothetical protein FF38_12829 [Lucilia cuprina]	KNC31583	0	87.068	1373.22	897	781
GMOY000434-PA	singed	587	gi|906471955|gb|KNC32178.1|Protein singed [Lucilia cuprina]	KNC32178	0	97.9684	888.641	443	434
GMOY010995-PA	zinc carboxypeptidase	349	gi|906460067|gb|KNC22913.1|hypothetical protein FF38_00370, partial [Lucilia cuprina]	KNC22913	3.85455E-180	82.7684	526.939	354	293
GMOY002138-PA	spermine oxidase	1513	gi|557782259|ref|XP_005190744.1|PREDICTED: spermine oxidase [Musca domestica]	XP_005190744	0	75.3623	571.622	483	364
GMOY007444-PA	glutathione synthetase isoform X2	455	gi|907605636|ref|XP_013109923.1|PREDICTED: glutathione synthetase-like isoform X2 [Stomoxys calcitrans]	XP_013109923	0	93.7209	752.666	430	403
GMOY004591-PA	trifunctional enzyme subunit mitochondrial	464	gi|557770911|ref|XP_005185118.1|PREDICTED: trifunctional enzyme subunit beta, mitochondrial [Musca domestica]	XP_005185118	0	92.2581	813.527	465	429
GMOY002277-PA	protease inhibitor-like	78	gi|907744168|ref|XP_013116875.1|PREDICTED: protease inhibitor-like [Stomoxys calcitrans]	XP_013116875	1.63225E-24	83.871	92.4337	62	52
GMOY010900-PA	leucine carboxyl methyltransferase 1 isoform X1	321	gi|906471025|gb|KNC31444.1|hypothetical protein FF38_06874 [Lucilia cuprina]	KNC31444	0	97.5078	627.861	321	313
GMOY007801-PA	four and a half LIM domains 2 isoform X8	245	gi|557780918|ref|XP_005190080.1|PREDICTED: four and a half LIM domains protein 2 isoform X8 [Musca domestica]	XP_005190080	1.50298E-175	97.551	487.649	245	239
GMOY011277-PA	neuroligin isoform A	1655	gi|906459335|gb|KNC22348.1|hypothetical protein FF38_02924 [Lucilia cuprina]	KNC22348	0	80	1509.2	1175	940
GMOY013003-PA	hypothetical protein FF38_13303	191	gi|906468463|gb|KNC29468.1|hypothetical protein FF38_13303 [Lucilia cuprina]	KNC29468	3.29043E-22	55.3672	96.2857	177	98
GMOY000932-PA	eukaryotic peptide chain release factor subunit 1 isoform X1	438	gi|906463203|gb|KNC25319.1|Eukaryotic peptide chain release factor subunit 1 [Lucilia cuprina]	KNC25319	0	99.7642	871.692	424	423
GMOY012040-PA	short-chain specific acyl- mitochondrial	148	gi|906474687|gb|KNC34207.1|hypothetical protein FF38_10092 [Lucilia cuprina]	KNC34207	7.52002E-63	73.8636	203.371	176	130
GMOY010854-PA	water dikinase	398	gi|907751459|ref|XP_013117969.1|PREDICTED: selenide, water dikinase [Stomoxys calcitrans]	XP_013117969	0	99.4975	823.543	398	396
GMOY002867-PA	glutaryl- mitochondrial	420	gi|907705375|ref|XP_013110381.1|PREDICTED: glutaryl-CoA dehydrogenase, mitochondrial [Stomoxys calcitrans]	XP_013110381	0	94.5238	761.525	420	397
GMOY005921-PA	ribose-phosphate pyrophosphokinase 2 isoform X4	363	gi|906469686|gb|KNC30386.1|hypothetical protein FF38_02678 [Lucilia cuprina]	KNC30386	0	98.0716	719.153	363	356
GMOY011942-PA	speract receptor-like isoform X1	1777	gi|906467342|gb|KNC28587.1|hypothetical protein FF38_05671 [Lucilia cuprina]	KNC28587	0	87.6263	2587.37	1584	1388
GMOY004289-PA	isoleucine--tRNA cytoplasmic	1235	gi|906461132|gb|KNC23675.1|hypothetical protein FF38_00804 [Lucilia cuprina]	KNC23675	0	90.2834	2142.08	1235	1115
GMOY006632-PA	hydroxylysine kinase	350	gi|557765863|ref|XP_005182629.1|PREDICTED: hydroxylysine kinase [Musca domestica]gi|557765867|ref|XP_005182631.1|PREDICTED: hydroxylysine kinase [Musca domestica]	XP_005182629, XP_005182631	6.352E-134	65.4118	393.66	425	278
GMOY006498-PA	10 kDa heat shock mitochondrial	102	gi|1158744067|gb|AQY54358.1|heat shock protein 10 [Musca domestica]	AQY54358	1.12817E-45	88	147.517	100	88
GMOY009892-PA	dynein heavy chain axonemal	2741	gi|1135078685|ref|XP_005182934.2|PREDICTED: dynein heavy chain 2, axonemal [Musca domestica]	XP_005182934	0	93.946	4885.86	2742	2576
GMOY008140-PA	PREDICTED: uncharacterized protein LOC105231092 isoform X1	646	gi|751800949|ref|XP_011210496.1|PREDICTED: uncharacterized protein LOC105231092 isoform X1 [Bactrocera dorsalis]	XP_011210496	3.5452E-25	44.5977	117.472	435	194
GMOY003495-PA	E3 ubiquitin- ligase TRAF7	292	gi|906462889|gb|KNC25086.1|hypothetical protein FF38_11903 [Lucilia cuprina]	KNC25086	4.89788E-158	84.2466	447.203	292	246
GMOY013033-PA	zinc finger MYND domain-containing 10 homolog	455	gi|557775931|ref|XP_005187610.1|PREDICTED: zinc finger MYND domain-containing protein 10 homolog [Musca domestica]	XP_005187610	0	82.9694	647.121	458	380
GMOY002167-PA	Golgi reassembly-stacking 2	490	gi|906459414|gb|KNC22411.1|hypothetical protein FF38_00138 [Lucilia cuprina]	KNC22411	0	72.8846	570.852	520	379
GMOY005612-PA	phospholipase A-2-activating	796	gi|906464101|gb|KNC26020.1|hypothetical protein FF38_03783 [Lucilia cuprina]	KNC26020	0	81.7728	1157.9	801	655
GMOY002218-PA	SCY1 2 isoform X2	874	gi|906475313|gb|KNC34698.1|hypothetical protein FF38_09137 [Lucilia cuprina]	KNC34698	0	85.7323	1182.16	792	679
GMOY013283-PA	serine threonine- phosphatase PP2A 65 kDa regulatory subunit isoform X1	592	gi|1184340642|ref|XP_020713037.1|serine/threonine-protein phosphatase PP2A 65 kDa regulatory subunit isoform X2 [Ceratitis capitata]	XP_020713037	0	99.661	1135.55	590	588
GMOY011691-PA	NADH-ubiquinone oxidoreductase 75 kDa mitochondrial	769	gi|557779038|ref|XP_005189146.1|PREDICTED: NADH-ubiquinone oxidoreductase 75 kDa subunit, mitochondrial [Musca domestica]	XP_005189146	0	94.5652	1353.96	736	696
GMOY004808-PA	3-oxoacyl-[acyl-carrier- ] reductase -like	254	gi|557777199|ref|XP_005188235.1|PREDICTED: uncharacterized protein LOC101890849 [Musca domestica]	XP_005188235	1.81185E-140	85.4331	399.823	254	217
GMOY002044-PB	glycerophosphocholine phosphodiesterase GPCPD1 isoform X2	699	gi|557754963|ref|XP_005177224.1|PREDICTED: glycerophosphocholine phosphodiesterase GPCPD1 isoform X2 [Musca domestica]	XP_005177224	0	76.9806	889.412	669	515
GMOY008922-PA	titin isoform X5	4754	gi|1036882010|ref|XP_017116196.1|PREDICTED: titin isoform X5 [Drosophila elegans]	XP_017116196	9.96531E-75	59.4231	287.73	520	309
GMOY003770-PA	Glutamine synthetase mitochondrial	400	gi|906467779|gb|KNC28939.1|Glutamine synthetase 1, mitochondrial [Lucilia cuprina]	KNC28939	0	94.25	754.207	400	377
GMOY011800-PA	histone	141	gi|498957560|ref|XP_004524171.1|histone H2A.v [Ceratitis capitata]gi|751441674|ref|XP_011195442.1|PREDICTED: histone H2A.v [Zeugodacus cucurbitae]gi|751777173|ref|XP_011197583.1|PREDICTED: histone H2A.v [Bactrocera dorsalis]gi|929368535|ref|XP_014094073.1|PREDICTED: histone H2A.v isoform X2 [Bactrocera oleae]gi|1098654323|ref|XP_018791267.1|PREDICTED: histone H2A.v [Bactrocera latifrons]gi|442540…	XP_004524171, XP_011195442, XP_011197583, XP_014094073, XP_018791267, AGC54789, KNC34500	1.69826E-79	100	236.498	116	116
GMOY002255-PA	apoptosis-inducing factor 3 isoform X1	1232	gi|1135080220|ref|XP_019892414.1|PREDICTED: apoptosis-inducing factor 3 isoform X1 [Musca domestica]	XP_019892414	0	81.0526	803.127	570	462
GMOY000734-PA	plexin-B	1553	gi|1048015021|ref|XP_017468489.1|PREDICTED: plexin-B [Rhagoletis zephyria]gi|1048015025|ref|XP_017468490.1|PREDICTED: plexin-B [Rhagoletis zephyria]	XP_017468489, XP_017468490	0	84.3646	2253.4	1503	1268
GMOY011910-PA	sulfatase-modifying factor 1	349	gi|906467527|gb|KNC28750.1|hypothetical protein FF38_05042 [Lucilia cuprina]	KNC28750	0	81.9945	543.117	361	296
GMOY000188-PA	dynein heavy chain axonemal	3307	gi|1135102099|ref|XP_019890994.1|PREDICTED: dynein heavy chain 7, axonemal [Musca domestica]	XP_019890994	0	90.5006	5524.52	3316	3001
GMOY011151-PA	nuclear pore complex DDB_G0274915	1350	gi|906458556|gb|KNC21735.1|hypothetical protein FF38_04012 [Lucilia cuprina]	KNC21735	9.38323E-115	57.9186	395.971	663	384
GMOY009756-PA	serine protease SP24D-like	783	gi|24266652|gb|AAN52278.1|AF468867_1Pro3 [Glossina morsitans morsitans]	AAN52278	8.18157E-178	90.9375	517.694	320	291
GMOY005582-PA	40S ribosomal S14	152	gi|498981588|ref|XP_004529646.1|40S ribosomal protein S14a [Ceratitis capitata]gi|751446470|ref|XP_011177326.1|PREDICTED: 40S ribosomal protein S14 [Zeugodacus cucurbitae]gi|751797264|ref|XP_011208484.1|PREDICTED: 40S ribosomal protein S14 [Bactrocera dorsalis]gi|929356999|ref|XP_014087730.1|PREDICTED: 40S ribosomal protein S14 [Bactrocera oleae]gi|1048023896|ref|XP_017472547.1|PREDICTED: 40S rib…	XP_004529646, XP_011177326, XP_011208484, XP_014087730, XP_017472547, XP_018797454	2.4797E-73	97.1631	221.476	141	137
GMOY007471-PA	lysosomal alpha-mannosidase isoform X2	1118	gi|906459915|gb|KNC22796.1|hypothetical protein FF38_04135 [Lucilia cuprina]	KNC22796	0	84.154	1711.81	1117	940
GMOY004876-PA	uncharacterized threonine-rich GPI-anchored glyco isoform X2	1755	gi|1135095800|ref|XP_019893846.1|PREDICTED: uncharacterized threonine-rich GPI-anchored glycoprotein PJ4664.02 isoform X2 [Musca domestica]	XP_019893846	0	60.8392	656.366	1144	696
GMOY001654-PA	F-actin-capping subunit beta	276	gi|907741123|ref|XP_013116447.1|PREDICTED: F-actin-capping protein subunit beta [Stomoxys calcitrans]gi|907741126|ref|XP_013116448.1|PREDICTED: F-actin-capping protein subunit beta [Stomoxys calcitrans]	XP_013116447, XP_013116448	0	98.1884	563.918	276	271
GMOY009396-PA	valine--tRNA ligase	1056	gi|906459705|gb|KNC22628.1|hypothetical protein FF38_04512 [Lucilia cuprina]	KNC22628	0	86.6803	1578.92	976	846
GMOY000905-PA	GTP-binding nuclear Ran	215	gi|1048039780|ref|XP_017476748.1|PREDICTED: GTP-binding nuclear protein Ran [Rhagoletis zephyria]gi|1048039782|ref|XP_017476749.1|PREDICTED: GTP-binding nuclear protein Ran [Rhagoletis zephyria]	XP_017476748, XP_017476749	2.2579E-160	100	446.817	215	215
GMOY009303-PA	irregular chiasm C-roughest	1094	gi|906466937|gb|KNC28280.1|hypothetical protein FF38_13153 [Lucilia cuprina]	KNC28280	0	80.8756	1266.91	868	702
GMOY012253-PA	Odorant receptor 43a	392	gi|659105281|gb|AID61210.1|odorant receptor [Calliphora stygia]	AID61210	2.96231E-162	74.036	465.307	389	288
GMOY002057-PA	pancreatic triacylglycerol lipase	503	gi|906467112|gb|KNC28398.1|hypothetical protein FF38_02107 [Lucilia cuprina]	KNC28398	0	81.1676	741.11	531	431
GMOY005684-PA	homeotic spalt-major	1437	gi|906468379|gb|KNC29404.1|hypothetical protein FF38_06564 [Lucilia cuprina]	KNC29404	0	68.1398	1306.58	1516	1033
GMOY013281-PA	proteasome subunit alpha type-4	261	gi|557767148|ref|XP_005183265.1|PREDICTED: proteasome subunit alpha type-4 [Musca domestica]	XP_005183265	3.67917E-156	96.6942	439.884	242	234
GMOY004474-PA	MATH and LRR domain-containing PFE0570w	1396	gi|906467810|gb|KNC28957.1|hypothetical protein FF38_13770 [Lucilia cuprina]	KNC28957	0	77.5068	921.383	738	572
GMOY004494-PA	nucleolar 10	1314	gi|907609525|ref|XP_013114681.1|PREDICTED: nucleolar protein 10 [Stomoxys calcitrans]	XP_013114681	0	82.0334	983.015	718	589
GMOY003303-PA	bicaudal D	786	gi|907672151|ref|XP_013104463.1|PREDICTED: protein bicaudal D isoform X1 [Stomoxys calcitrans]gi|907672154|ref|XP_013104464.1|PREDICTED: protein bicaudal D isoform X1 [Stomoxys calcitrans]gi|907672157|ref|XP_013104465.1|PREDICTED: protein bicaudal D isoform X1 [Stomoxys calcitrans]	XP_013104463, XP_013104464, XP_013104465	0	96.3542	1262.28	768	740
GMOY011838-PA	adenylate kinase isoenzyme 5 isoform X1	617	gi|907652037|ref|XP_013102298.1|PREDICTED: adenylate kinase isoenzyme 5 isoform X2 [Stomoxys calcitrans]	XP_013102298	0	82.2785	888.641	632	520
GMOY002634-PA	pyrroline-5-carboxylate reductase mitochondrial	272	gi|110611286|gb|ABG77992.1|pyrroline-5-carboxylate reductase 1, partial [Glossina morsitans morsitans]	ABG77992	1.0904E-180	100	501.901	247	247
GMOY011987-PA	Conserved oligomeric Golgi complex subunit 2	329	gi|906463118|gb|KNC25253.1|Conserved oligomeric Golgi complex subunit 2 [Lucilia cuprina]	KNC25253	2.36555E-114	73.716	355.14	331	244
GMOY004089-PA	pre-mRNA 3 end processing WDR33	826	gi|557770126|ref|XP_005184733.1|PREDICTED: pre-mRNA 3' end processing protein WDR33 [Musca domestica]	XP_005184733	0	93.1193	1177.16	654	609
GMOY000419-PA	adenosine kinase	344	gi|906469967|gb|KNC30591.1|hypothetical protein FF38_11970 [Lucilia cuprina]	KNC30591	0	90.6977	577.4	344	312
GMOY009045-PA	acylpyruvase mitochondrial	233	gi|906461197|gb|KNC23726.1|hypothetical protein FF38_01193 [Lucilia cuprina]	KNC23726	2.24504E-108	82.4324	316.235	222	183
GMOY010665-PA	nitric oxide-associated 1	653	gi|907642632|ref|XP_013100585.1|PREDICTED: nitric oxide-associated protein 1 [Stomoxys calcitrans]	XP_013100585	0	79.4349	865.144	637	506
GMOY004863-PA	C-factor isoform X1	248	gi|906457586|gb|KNC21001.1|hypothetical protein FF38_07556 [Lucilia cuprina]	KNC21001	5.97991E-146	91.129	412.92	248	226
GMOY002963-PA	monocarboxylate transporter 9 isoform X2	486	gi|557779690|ref|XP_005189470.1|PREDICTED: uncharacterized protein LOC101900574 [Musca domestica]	XP_005189470	2.26875E-81	76.7717	273.092	254	195
GMOY010053-PA	antichymotrypsin-2 isoform X1	385	gi|83595243|gb|ABC25073.1|serine protease inhibitor 4 [Glossina morsitans morsitans]	ABC25073	4.7812E-61	54.1555	207.608	373	202
GMOY001308-PA	hypothetical protein FF38_00275, partial	1550	gi|906472763|gb|KNC32812.1|hypothetical protein FF38_00275, partial [Lucilia cuprina]	KNC32812	0	62.5	757.673	1080	675
GMOY001431-PA	regulatory zeste	405	gi|907629644|ref|XP_013098786.1|PREDICTED: regulatory protein zeste [Stomoxys calcitrans]gi|907629650|ref|XP_013098787.1|PREDICTED: regulatory protein zeste [Stomoxys calcitrans]gi|907629660|ref|XP_013098788.1|PREDICTED: regulatory protein zeste [Stomoxys calcitrans]	XP_013098786, XP_013098787, XP_013098788	8.68231E-93	73.7589	294.664	282	208
GMOY010177-PA	14-3-3 zeta isoform X1	248	gi|24652326|ref|NP_724885.1|14-3-3zeta, isoform A [Drosophila melanogaster]gi|24652328|ref|NP_724886.1|14-3-3zeta, isoform B [Drosophila melanogaster]gi|28573324|ref|NP_724889.2|14-3-3zeta, isoform G [Drosophila melanogaster]gi|45552539|ref|NP_995792.1|14-3-3zeta, isoform H [Drosophila melanogaster]gi|62471697|ref|NP_001014516.1|14-3-3zeta, isoform I [Drosophila melanogaster]gi|2274922|emb|CAA731…	NP_724885, NP_724886, NP_724889, NP_995792, NP_001014516, CAA73153, AAF58843, AAM71062, AAF58842, AAS64884, AAX52716, ACX32980, AOQ05835, AOQ09859	8.43623E-115	85.9574	334.339	235	202
GMOY012286-PA	---NA---	53	No Blast Hit
GMOY003934-PA	probable aconitate mitochondrial	900	gi|906468384|gb|KNC29409.1|hypothetical protein FF38_06584 [Lucilia cuprina]	KNC29409	0	93.1613	1357.43	775	722
GMOY000311-PA	spermine oxidase	468	gi|557782259|ref|XP_005190744.1|PREDICTED: spermine oxidase [Musca domestica]	XP_005190744	4.70158E-177	69.7479	501.516	476	332
GMOY000656-PA	spermine oxidase	488	gi|557782259|ref|XP_005190744.1|PREDICTED: spermine oxidase [Musca domestica]	XP_005190744	0	78.9362	562.762	470	371
GMOY008008-PA	PREDICTED: uncharacterized protein LOC106084447 isoform X1	2172	gi|907667306|ref|XP_013103588.1|PREDICTED: uncharacterized protein LOC106084447 isoform X1 [Stomoxys calcitrans]	XP_013103588	0	71.0454	1478.38	1454	1033
GMOY003279-PA	methionine aminopeptidase 2	640	gi|557783250|ref|XP_005191234.1|PREDICTED: methionine aminopeptidase 2B [Musca domestica]	XP_005191234	0	96.4865	722.235	370	357
GMOY006719-PA	calcyphosin isoform X1	280	gi|557781292|ref|XP_005190265.1|PREDICTED: calcyphosin-like protein isoform X1 [Musca domestica]gi|755893780|ref|XP_011295252.1|PREDICTED: calcyphosin-like protein isoform X1 [Musca domestica]	XP_005190265, XP_011295252	6.95384E-128	85.6557	368.622	244	209
GMOY008468-PA	membrane metallo-endopeptidase-like 1	1464	gi|807025090|ref|XP_012156191.1|uncharacterized protein LOC101453860 [Ceratitis capitata]	XP_012156191	0	60.9862	1005.36	1379	841
GMOY005952-PA	Myotrophin	116	gi|906460328|gb|KNC23116.1|hypothetical protein FF38_13744 [Lucilia cuprina]	KNC23116	5.77305E-63	88.6957	192.586	115	102
GMOY002053-PA	dihydrolipoyllysine-residue succinyltransferase component of 2-oxoglutarate dehydrogenase mitochondrial	452	gi|907736241|ref|XP_013115694.1|PREDICTED: dihydrolipoyllysine-residue succinyltransferase component of 2-oxoglutarate dehydrogenase complex, mitochondrial [Stomoxys calcitrans]	XP_013115694	4.8995E-162	94.0945	471.47	254	239
GMOY003209-PA	aldehyde dehydrogenase mitochondrial	492	gi|110611282|gb|ABG77990.1|1-pyrroline-5-carboxylate dehydrogenase 1 [Glossina morsitans morsitans]	ABG77990	0	100	962.985	492	492
GMOY009161-PA	chitinase Idgf5	440	gi|122001616|sp|Q2PQM6.1|IDGF5_GLOMMRecName: Full=Chitinase-like protein Idgf5; AltName: Full=Imaginal disk growth factor protein 5; Flags: Precursorgi|83595291|gb|ABC25097.1|imaginal disc growth factor 5 [Glossina morsitans morsitans]	Q2PQM6, ABC25097	0	100	922.154	440	440
GMOY001340-PA	glycine-rich cell wall structural	315	gi|498956168|ref|XP_004523949.1|glycine-rich protein DOT1 [Ceratitis capitata]gi|498956180|ref|XP_004523951.1|glycine-rich protein DOT1 [Ceratitis capitata]gi|1184344988|ref|XP_020713999.1|glycine-rich protein DOT1 [Ceratitis capitata]	XP_004523949, XP_004523951, XP_020713999	1.885E-8	90	61.6178	40	36
GMOY007618-PA	copper transport ATOX1	71	gi|906457118|gb|KNC20615.1|hypothetical protein FF38_06922, partial [Lucilia cuprina]	KNC20615	4.89981E-37	94.3662	124.79	71	67
GMOY001757-PA	eukaryotic translation initiation factor 3 subunit J	230	gi|751443585|ref|XP_011196494.1|PREDICTED: eukaryotic translation initiation factor 3 subunit J [Zeugodacus cucurbitae]	XP_011196494	5.1006E-69	74.8768	216.853	203	152
GMOY006091-PA	eukaryotic translation initiation factor 3 subunit J	236	gi|751443585|ref|XP_011196494.1|PREDICTED: eukaryotic translation initiation factor 3 subunit J [Zeugodacus cucurbitae]	XP_011196494	3.24117E-64	74.2424	204.912	198	147
GMOY004924-PA	leucine-rich repeat-containing DDB_G0290503	584	gi|906470761|gb|KNC31227.1|hypothetical protein FF38_14272 [Lucilia cuprina]	KNC31227	0	75.6345	719.539	591	447
GMOY001822-PA	eukaryotic translation initiation factor 2 subunit 1	342	gi|557781046|ref|XP_005190144.1|PREDICTED: eukaryotic translation initiation factor 2 subunit 1 [Musca domestica]	XP_005190144	3.65604E-180	94.864	507.679	331	314
GMOY004180-PA	T-complex 1 subunit delta	552	gi|906470833|gb|KNC31299.1|hypothetical protein FF38_14342 [Lucilia cuprina]	KNC31299	0	92.9603	994.956	554	515
GMOY010759-PA	Cytochrome b-c1 complex subunit 9	78	gi|906458698|gb|KNC21866.1|Cytochrome b-c1 complex subunit 9 [Lucilia cuprina]	KNC21866	5.22403E-25	87.2727	93.2041	55	48
GMOY004530-PA	probable transaldolase	332	gi|906474098|gb|KNC33761.1|putative transaldolase [Lucilia cuprina]	KNC33761	0	89.697	567.77	330	296
GMOY011971-PA	probable transaldolase	239	gi|906474098|gb|KNC33761.1|putative transaldolase [Lucilia cuprina]	KNC33761	1.53904E-110	68.1356	326.25	295	201
GMOY013256-PA	40S ribosomal S15	147	gi|1135096588|ref|XP_005176393.3|PREDICTED: 40S ribosomal protein S15 [Musca domestica]	XP_005176393	3.65551E-86	96.5986	253.832	147	142
GMOY004082-PA	T-complex 1 subunit gamma	545	gi|498933321|ref|XP_004519608.1|T-complex protein 1 subunit gamma [Ceratitis capitata]	XP_004519608	0	97.0642	1036.94	545	529
GMOY005408-PA	---NA---	74	No Blast Hit
GMOY005496-PA	asparagine--tRNA cytoplasmic	160	gi|557760097|ref|XP_005179772.1|PREDICTED: asparagine--tRNA ligase, cytoplasmic [Musca domestica]	XP_005179772	1.04587E-76	92.5	243.432	160	148
GMOY000939-PA	glycine receptor subunit alpha-4	588	gi|906461506|gb|KNC23974.1|hypothetical protein FF38_07423 [Lucilia cuprina]	KNC23974	0	86.5347	799.66	505	437
GMOY011495-PA	plasminogen activator inhibitor 1 RNA-binding	407	gi|751472525|ref|XP_011191580.1|PREDICTED: plasminogen activator inhibitor 1 RNA-binding protein [Zeugodacus cucurbitae]	XP_011191580	3.93715E-67	59.0805	224.557	435	257
GMOY009457-PA	V-type proton ATPase subunit D 1	246	gi|557760618|ref|XP_005180029.1|PREDICTED: V-type proton ATPase subunit D 1 [Musca domestica]	XP_005180029	5.15053E-173	98.374	481.485	246	242
GMOY004641-PA	eukaryotic translation initiation factor X-chromosomal	75	gi|7264651|gb|AAF44294.1|AF169359_1eukaryotic translation initiation factor 1A [Drosophila melanogaster]	AAF44294	1.17385E-23	100	92.0485	43	43
GMOY009595-PA	40S ribosomal S17	131	gi|968086144|ref|XP_002062490.2|uncharacterized protein Dwil_GK16630 [Drosophila willistoni]gi|946580759|gb|EDW73476.2|uncharacterized protein Dwil_GK16630 [Drosophila willistoni]	XP_002062490, EDW73476	2.9046E-77	98.4733	229.95	131	129
GMOY003977-PA	bumetanide-sensitive sodium-(potassium)-chloride cotransporter isoform X2	211	gi|755857966|ref|XP_011296631.1|PREDICTED: bumetanide-sensitive sodium-(potassium)-chloride cotransporter isoform X1 [Musca domestica]gi|1135098719|ref|XP_019890263.1|PREDICTED: bumetanide-sensitive sodium-(potassium)-chloride cotransporter isoform X2 [Musca domestica]	XP_011296631, XP_019890263	4.68143E-82	80.3191	270.396	188	151
GMOY005887-PA	inorganic pyrophosphatase	336	gi|557755810|ref|XP_005177643.1|PREDICTED: inorganic pyrophosphatase [Musca domestica]	XP_005177643	1.29624E-167	84	475.322	300	252
GMOY004983-PA	heterogeneous nuclear ribonucleo A1	258	gi|1048043477|ref|XP_017493135.1|PREDICTED: heterogeneous nuclear ribonucleoprotein 87F-like [Rhagoletis zephyria]	XP_017493135	3.89162E-103	95.7055	303.523	163	156
GMOY002503-PA	26S protease regulatory subunit 6A-B	427	gi|557765691|ref|XP_005182543.1|PREDICTED: 26S protease regulatory subunit 6A-B [Musca domestica]gi|557765693|ref|XP_005182544.1|PREDICTED: 26S protease regulatory subunit 6A-B [Musca domestica]gi|755872214|ref|XP_011292091.1|PREDICTED: 26S protease regulatory subunit 6A-B [Musca domestica]gi|907676830|ref|XP_013105352.1|PREDICTED: 26S protease regulatory subunit 6A-B [Stomoxys calcitrans]gi|9076…	XP_005182543, XP_005182544, XP_011292091, XP_013105352, XP_013105353	0	99.0632	858.21	427	423
GMOY009851-PA	proteasome subunit alpha type-3	253	gi|907648221|ref|XP_013101703.1|PREDICTED: proteasome subunit alpha type-3 [Stomoxys calcitrans]	XP_013101703	7.96352E-163	94.8617	456.062	253	240
GMOY000226-PA	V-type proton ATPase 116 kDa subunit a	849	gi|557765673|ref|XP_005182534.1|PREDICTED: V-type proton ATPase 116 kDa subunit a [Musca domestica]gi|755872185|ref|XP_011292090.1|PREDICTED: V-type proton ATPase 116 kDa subunit a [Musca domestica]	XP_005182534, XP_011292090	0	93.1684	1499.18	849	791
GMOY011852-PA	phytanoyl- dioxygenase domain-containing 1	497	gi|195449154|ref|XP_002071949.1|uncharacterized protein Dwil_GK22578 [Drosophila willistoni]gi|194168034|gb|EDW82935.1|uncharacterized protein Dwil_GK22578 [Drosophila willistoni]	XP_002071949, EDW82935	0	91.6376	514.998	287	263
GMOY010017-PA	NADH dehydrogenase [ubiquinone] 1 alpha subcomplex subunit 2	97	gi|906460073|gb|KNC22919.1|hypothetical protein FF38_00358 [Lucilia cuprina]	KNC22919	2.84547E-49	85.1064	156.377	94	80
GMOY009248-PA	lamin-C isoform X2	620	gi|906462679|gb|KNC24895.1|Lamin-C [Lucilia cuprina]	KNC24895	0	88.0137	881.708	584	514
GMOY011890-PA	UMP-CMP kinase	201	gi|907711788|ref|XP_013111419.1|PREDICTED: UMP-CMP kinase [Stomoxys calcitrans]	XP_013111419	1.12214E-119	94.359	343.969	195	184
GMOY002150-PA	O-acetyl-ADP-ribose deacetylase 1 isoform X2	187	gi|1135088599|ref|XP_019894187.1|PREDICTED: O-acetyl-ADP-ribose deacetylase 1 isoform X2 [Musca domestica]	XP_019894187	1.3551E-77	86.8421	235.728	152	132
GMOY011951-PA	phosphatase 1 regulatory subunit 7	315	gi|907711348|ref|XP_013111283.1|PREDICTED: protein phosphatase 1 regulatory subunit 7 [Stomoxys calcitrans]	XP_013111283	3.57642E-130	83.2278	379.407	316	263
GMOY011826-PA	Nucleoplasmin	160	gi|906466477|gb|KNC27898.1|Nucleoplasmin-like protein [Lucilia cuprina]	KNC27898	8.03242E-75	93.125	225.713	160	149
GMOY006580-PA	cysteine ase CG12163 isoform X1	325	gi|906469317|gb|KNC30128.1|putative cysteine proteinase [Lucilia cuprina]	KNC30128	9.79971E-87	89.1566	270.396	166	148
GMOY011464-PA	SUMO-activating enzyme subunit 1	527	gi|498926629|ref|XP_004517947.1|SUMO-activating enzyme subunit 1 [Ceratitis capitata]	XP_004517947	9.95232E-147	83.7838	429.869	296	248
GMOY002737-PA	uridine 5 -monophosphate synthase	485	gi|907619094|ref|XP_013119500.1|PREDICTED: uridine 5'-monophosphate synthase [Stomoxys calcitrans]	XP_013119500	0	87.7593	778.859	482	423
GMOY004783-PA	ATP-dependent 6-phosphofructokinase isoform X3	845	gi|906470666|gb|KNC31142.1|6-phosphofructokinase [Lucilia cuprina]	KNC31142	0	90.2353	1442.94	850	767
GMOY003541-PA	Cytochrome c oxidase subunit mitochondrial	148	gi|906461963|gb|KNC24349.1|Cytochrome c oxidase subunit 5A, mitochondrial [Lucilia cuprina]	KNC24349	2.65908E-83	93.2432	246.514	148	138
GMOY006884-PA	ATP-binding cassette sub-family E member 1	611	gi|751443075|ref|XP_011196211.1|PREDICTED: ATP-binding cassette sub-family E member 1 [Zeugodacus cucurbitae]	XP_011196211	0	98.5197	1210.67	608	599
GMOY001833-PA	ATP-binding cassette sub-family F member 2	622	gi|1098675595|ref|XP_018798065.1|PREDICTED: ATP-binding cassette sub-family F member 2 [Bactrocera latifrons]	XP_018798065	0	95.8199	1100.5	622	596
GMOY013044-PA	tubulin-specific chaperone A	114	gi|907703756|ref|XP_013110153.1|PREDICTED: tubulin-specific chaperone A [Stomoxys calcitrans]	XP_013110153	3.22977E-37	89.1892	127.102	74	66
GMOY010208-PA	60S ribosomal L24	149	gi|557784317|ref|XP_005191762.1|PREDICTED: 60S ribosomal protein L24 [Musca domestica]	XP_005191762	3.03839E-50	98.9474	163.31	95	94
GMOY008178-PA	---NA---	164	No Blast Hit
GMOY004371-PA	anamorsin homolog	271	gi|557783338|ref|XP_005191277.1|PREDICTED: anamorsin homolog [Musca domestica]	XP_005191277	1.73646E-104	78.3883	309.301	273	214
GMOY004091-PA	transcriptional activator Pur-alpha isoform X1	281	gi|557772775|ref|XP_005186042.1|PREDICTED: transcriptional activator protein Pur-alpha isoform X1 [Musca domestica]gi|557772779|ref|XP_005186044.1|PREDICTED: transcriptional activator protein Pur-alpha isoform X1 [Musca domestica]gi|557772783|ref|XP_005186046.1|PREDICTED: transcriptional activator protein Pur-alpha isoform X1 [Musca domestica]gi|755882179|ref|XP_011293571.1|PREDICTED: transcripti…	XP_005186042, XP_005186044, XP_005186046, XP_011293571, XP_019893204	9.48288E-180	93.7956	501.516	274	257
GMOY004920-PA	Mo25	340	gi|751805107|ref|XP_011212769.1|PREDICTED: protein Mo25 [Bactrocera dorsalis]gi|1098649926|ref|XP_018789939.1|PREDICTED: protein Mo25 [Bactrocera latifrons]	XP_011212769, XP_018789939	0	100	630.943	340	340
GMOY011241-PA	glutaredoxin-C4	116	gi|751469916|ref|XP_011190165.1|PREDICTED: glutaredoxin-C4 [Zeugodacus cucurbitae]	XP_011190165	1.76381E-63	87.931	193.741	116	102
GMOY002543-PA	glutaredoxin-C4	116	gi|751469916|ref|XP_011190165.1|PREDICTED: glutaredoxin-C4 [Zeugodacus cucurbitae]	XP_011190165	3.37394E-62	87.1795	190.66	117	102
GMOY006441-PA	proteasome inhibitor PI31 subunit	251	gi|906468513|gb|KNC29504.1|putative proteasome inhibitor [Lucilia cuprina]	KNC29504	1.88444E-94	77.7328	272.707	247	192
GMOY001483-PA	amphiphysin isoform X1	309	gi|1098652093|ref|XP_018790547.1|PREDICTED: circumsporozoite protein-like isoform X2 [Bactrocera latifrons]	XP_018790547	5.93416E-44	95.9459	157.918	74	71
GMOY001434-PA	hypothetical protein FF38_03899	339	gi|906473027|gb|KNC33018.1|hypothetical protein FF38_03899 [Lucilia cuprina]	KNC33018	6.71869E-98	67.5439	299.671	342	231
GMOY005531-PA	aldose 1-epimerase	367	gi|906467407|gb|KNC28639.1|hypothetical protein FF38_04899 [Lucilia cuprina]	KNC28639	0	87.1935	567.77	367	320
GMOY007053-PA	transketolase 2	1213	gi|906458305|gb|KNC21540.1|hypothetical protein FF38_05359 [Lucilia cuprina]	KNC21540	0	94.3493	973.385	584	551
GMOY002553-PA	proteasome subunit beta type-4	273	gi|907677841|ref|XP_013105699.1|PREDICTED: proteasome subunit beta type-4 [Stomoxys calcitrans]	XP_013105699	4.74882E-146	85.8209	415.231	268	230
GMOY005043-PA	general transcriptional corepressor trfA	326	gi|906465949|gb|KNC27494.1|hypothetical protein FF38_12344 [Lucilia cuprina]	KNC27494	8.81263E-35	57.9487	138.272	195	113
GMOY007875-PA	lysine--tRNA ligase isoform X1	1137	gi|906463435|gb|KNC25507.1|hypothetical protein FF38_00889 [Lucilia cuprina]	KNC25507	0	89.5548	993.801	584	523
GMOY008377-PA	probable aminopeptidase NPEPL1 isoform X2	641	gi|968059326|ref|XP_001998937.2|uncharacterized protein Dmoj_GI24235, isoform A [Drosophila mojavensis]gi|946588330|gb|EDW14398.2|uncharacterized protein Dmoj_GI24235, isoform A [Drosophila mojavensis]	XP_001998937, EDW14398	0	75.3333	758.444	600	452
GMOY003993-PA	translation factor SUI1 homolog	110	gi|242023184|ref|XP_002432016.1|translation factor sui1, putative [Pediculus humanus corporis]gi|212517367|gb|EEB19278.1|translation factor sui1, putative [Pediculus humanus corporis]	XP_002432016, EEB19278	8.25922E-78	100	229.565	110	110
GMOY003874-PA	RNA-binding squid isoform X1	307	gi|1135091457|ref|XP_005190461.3|PREDICTED: RNA-binding protein squid [Musca domestica]	XP_005190461	1.44728E-117	87.037	346.28	216	188
GMOY008302-PA	Proteasome subunit alpha type-5	242	gi|906464273|gb|KNC26130.1|Proteasome subunit alpha type-5 [Lucilia cuprina]	KNC26130	8.66613E-168	97.1074	467.618	242	235
GMOY004235-PA	isocitrate dehydrogenase [NADP] cytoplasmic isoform X2	420	gi|906475328|gb|KNC34713.1|hypothetical protein FF38_09151, partial [Lucilia cuprina]	KNC34713	0	82.5553	588.956	407	336
GMOY002769-PA	transport Sec61 subunit beta	78	gi|195429427|ref|XP_002062764.1|uncharacterized protein Dwil_GK19628 [Drosophila willistoni]gi|194158849|gb|EDW73750.1|uncharacterized protein Dwil_GK19628 [Drosophila willistoni]	XP_002062764, EDW73750	3.46457E-39	93.6709	130.183	79	74
GMOY003219-PA	dnaJ homolog 1	337	gi|985567464|ref|NP_001306716.1|dnaJ protein homolog 1 [Bactrocera dorsalis]gi|751774602|ref|XP_011213930.1|PREDICTED: dnaJ protein homolog 1 isoform X1 [Bactrocera dorsalis]gi|339716582|gb|AEJ88465.1|heat shock protein 40 [Bactrocera dorsalis]	NP_001306716, XP_011213930, AEJ88465	0	88.4393	520.776	346	306
GMOY005565-PA	methionine--tRNA cytoplasmic	827	gi|906468204|gb|KNC29254.1|hypothetical protein FF38_02414, partial [Lucilia cuprina]	KNC29254	0	77.4444	1204.5	900	697
GMOY001805-PA	isocitrate dehydrogenase [NAD] subunit mitochondrial isoform X2	412	gi|110611274|gb|ABG77986.1|isocitrate dehydrogenase (NAD+) 1 [Glossina morsitans morsitans]	ABG77986	0	95.1456	799.275	412	392
GMOY009569-PA	histidine triad nucleotide-binding 1	154	gi|906460293|gb|KNC23086.1|hypothetical protein FF38_10456 [Lucilia cuprina]	KNC23086	6.70562E-78	88.1481	233.417	135	119
GMOY000825-PA	adenylate kinase isoenzyme 1 isoform X1	576	gi|907661653|ref|XP_013102784.1|PREDICTED: adenylate kinase isoenzyme 1 isoform X1 [Stomoxys calcitrans]	XP_013102784	1.74232E-109	82.4324	332.413	222	183
GMOY000989-PA	transmembrane 165 isoform X3	503	gi|557782990|ref|XP_005191105.1|PREDICTED: bromodomain-containing protein DDB_G0270170 isoform X1 [Musca domestica]gi|1135092634|ref|XP_019895008.1|PREDICTED: bromodomain-containing protein DDB_G0270170 isoform X1 [Musca domestica]	XP_005191105, XP_019895008	3.5401E-145	60.5684	432.95	563	341
GMOY006739-PA	60S ribosomal L13	212	gi|907702585|ref|XP_013109855.1|PREDICTED: 60S ribosomal protein L13 [Stomoxys calcitrans]	XP_013109855	3.02955E-117	97.9381	337.421	194	190
GMOY009288-PA	probable prefoldin subunit 4	138	gi|906468998|gb|KNC29891.1|putative prefoldin subunit 4 [Lucilia cuprina]	KNC29891	8.40526E-69	94.9275	196.438	138	131
GMOY005927-PA	ATP-binding cassette sub-family F member 3	706	gi|906459007|gb|KNC22105.1|hypothetical protein FF38_06206 [Lucilia cuprina]	KNC22105	0	95.0425	1266.52	706	671
GMOY000219-PA	dynein light chain Tctex-type	111	gi|557769799|ref|XP_005184571.1|PREDICTED: dynein light chain Tctex-type [Musca domestica]gi|907663251|ref|XP_013102923.1|PREDICTED: dynein light chain Tctex-type [Stomoxys calcitrans]	XP_005184571, XP_013102923	2.00427E-77	99.0991	228.794	111	110
GMOY004626-PA	40S ribosomal S20	120	gi|557784403|ref|XP_005191805.1|PREDICTED: 40S ribosomal protein S20 [Musca domestica]gi|907644976|ref|XP_013101199.1|PREDICTED: 40S ribosomal protein S20 [Stomoxys calcitrans]	XP_005191805, XP_013101199	5.36985E-81	97.5	238.424	120	117
GMOY003405-PA	obg-like ATPase 1	397	gi|755872860|ref|XP_005182762.2|PREDICTED: obg-like ATPase 1 [Musca domestica]	XP_005182762	0	96.6146	738.799	384	371
GMOY012189-PA	D2 isoform X3	211	gi|557754294|ref|XP_005176891.1|PREDICTED: protein D2-like [Musca domestica]gi|557765081|ref|XP_005182244.1|PREDICTED: protein D2-like [Musca domestica]	XP_005176891, XP_005182244	4.32162E-100	87.5	293.893	184	161
GMOY002859-PA	odorant-binding 56h	134	gi|281426821|emb|CBA11317.1|odorant binding protein 13, partial [Glossina morsitans morsitans]	CBA11317	1.43871E-78	100	232.646	113	113
GMOY011998-PA	4-aminobutyrate mitochondrial	489	gi|557765594|ref|XP_005182496.1|PREDICTED: 4-aminobutyrate aminotransferase, mitochondrial [Musca domestica]	XP_005182496	0	84.0164	717.613	488	410
GMOY007323-PB	eukaryotic translation initiation factor 5	452	gi|498931806|ref|XP_004519241.1|eukaryotic translation initiation factor 5 [Ceratitis capitata]gi|498931810|ref|XP_004519242.1|eukaryotic translation initiation factor 5 [Ceratitis capitata]gi|807017938|ref|XP_012162455.1|eukaryotic translation initiation factor 5 [Ceratitis capitata]	XP_004519241, XP_004519242, XP_012162455	0	86.7882	659.833	439	381
GMOY003400-PA	telomere length regulation TEL2 homolog isoform X1	1591	gi|906472284|gb|KNC32443.1|hypothetical protein FF38_05003 [Lucilia cuprina]	KNC32443	0	70.9181	1441.02	1623	1151
GMOY013239-PA	Glycine cleavage system H mitochondrial	150	gi|906475323|gb|KNC34708.1|Glycine cleavage system H protein, mitochondrial [Lucilia cuprina]	KNC34708	1.89236E-65	73.6196	201.83	163	120
GMOY011058-PA	hydroxyacylglutathione mitochondrial isoform X3	408	gi|906472368|gb|KNC32512.1|hypothetical protein FF38_07285 [Lucilia cuprina]	KNC32512	9.48959E-175	85.209	494.967	311	265
GMOY011634-PA	glyoxylate reductase hydroxypyruvate reductase	360	gi|906469412|gb|KNC30188.1|hypothetical protein FF38_00834 [Lucilia cuprina]	KNC30188	2.24239E-155	86.4048	446.432	331	286
GMOY012058-PA	glucosamine-6-phosphate isomerase isoform X2	538	gi|907646878|ref|XP_013101367.1|PREDICTED: glucosamine-6-phosphate isomerase isoform X2 [Stomoxys calcitrans]	XP_013101367	2.17483E-177	96.9349	505.368	261	253
GMOY002501-PA	ran-binding 3	439	gi|906468800|gb|KNC29743.1|hypothetical protein FF38_05222 [Lucilia cuprina]	KNC29743	1.38842E-144	75.395	425.246	443	334
GMOY009915-PA	hypothetical protein FF38_12628	142	gi|906458179|gb|KNC21458.1|hypothetical protein FF38_12628 [Lucilia cuprina]	KNC21458	9.41066E-52	67.3077	166.777	156	105
GMOY008464-PA	serine-arginine 55 isoform X1	351	gi|906462670|gb|KNC24889.1|Serine-arginine protein 55 [Lucilia cuprina]	KNC24889	4.60154E-104	95.8115	315.079	191	183
GMOY000765-PA	adenosylhomocysteinase 2	503	gi|907633542|ref|XP_013099294.1|PREDICTED: putative adenosylhomocysteinase 2 [Stomoxys calcitrans]gi|907633545|ref|XP_013099295.1|PREDICTED: putative adenosylhomocysteinase 2 [Stomoxys calcitrans]	XP_013099294, XP_013099295	0	98.6083	949.503	503	496
GMOY011455-PA	serine threonine- phosphatase alpha-1 isoform	327	gi|907632996|ref|XP_013099134.1|PREDICTED: serine/threonine-protein phosphatase alpha-1 isoform [Stomoxys calcitrans]gi|907633000|ref|XP_013099135.1|PREDICTED: serine/threonine-protein phosphatase alpha-1 isoform [Stomoxys calcitrans]	XP_013099134, XP_013099135	0	99.3651	643.654	315	313
GMOY012080-PA	Heat shock 23	167	gi|557780958|ref|XP_005190100.1|PREDICTED: heat shock protein 22 [Musca domestica]	XP_005190100	2.10212E-76	85.0932	230.335	161	137
GMOY003882-PA	electron transfer flavo -ubiquinone mitochondrial	1111	gi|557765008|ref|XP_005182208.1|PREDICTED: electron transfer flavoprotein-ubiquinone oxidoreductase, mitochondrial [Musca domestica]	XP_005182208	0	94.6932	1113.6	603	571
GMOY013264-PA	40S ribosomal S2	147	gi|906463998|gb|KNC25948.1|40S ribosomal protein S2 [Lucilia cuprina]	KNC25948	1.81689E-56	98.4	171.785	125	123
GMOY006748-PA	bis(5 -nucleosyl)-tetraphosphatase [asymmetrical]	139	gi|1013896788|ref|XP_016024385.1|uncharacterized protein Dsimw501_GD11976 [Drosophila simulans]gi|900886676|gb|KMY89369.1|uncharacterized protein Dsimw501_GD11976 [Drosophila simulans]	XP_016024385, KMY89369	5.67019E-74	89.7059	222.246	136	122
GMOY000485-PA	proline dehydrogenase mitochondrial isoform X1	206	gi|1135080597|ref|XP_019892511.1|PREDICTED: proline dehydrogenase 1, mitochondrial [Musca domestica]	XP_019892511	1.23567E-31	70.5357	126.716	112	79
GMOY000803-PA	ADP-ribosylation factor GTPase-activating 2	578	gi|906467228|gb|KNC28482.1|hypothetical protein FF38_05554 [Lucilia cuprina]	KNC28482	0	78.438	687.952	589	462
GMOY010016-PA	probable pseudouridine-5 -phosphatase isoform X2	245	gi|906460056|gb|KNC22902.1|putative pseudouridine-5'-monophosphatase [Lucilia cuprina]	KNC22902	5.48195E-111	79.0795	326.635	239	189
GMOY009428-PA	phosphatidylinositol transfer alpha isoform isoform X2	298	gi|557756950|ref|XP_005178209.1|PREDICTED: phosphatidylinositol transfer protein beta isoform isoform X2 [Musca domestica]	XP_005178209	0	87.9195	513.457	298	262
GMOY004807-PA	src substrate cortactin	557	gi|906458721|gb|KNC21882.1|hypothetical protein FF38_11462, partial [Lucilia cuprina]	KNC21882	0	79.3277	779.63	595	472
GMOY007263-PA	V-type proton ATPase subunit S1	384	gi|907729787|ref|XP_013114516.1|PREDICTED: V-type proton ATPase subunit S1 [Stomoxys calcitrans]	XP_013114516	1.61099E-98	62.5316	303.523	395	247
GMOY001035-PA	peroxisomal biogenesis factor 19	223	gi|907683054|ref|XP_013106762.1|PREDICTED: peroxisomal biogenesis factor 19 [Stomoxys calcitrans]	XP_013106762	6.18684E-125	89.823	360.533	226	203
GMOY003170-PA	Charged multivesicular body 5	227	gi|906463695|gb|KNC25699.1|Charged multivesicular body protein 5 [Lucilia cuprina]	KNC25699	1.00116E-119	94.7137	333.569	227	215
GMOY002223-PA	60S ribosomal L18	188	gi|907613769|ref|XP_013118665.1|PREDICTED: 60S ribosomal protein L18 [Stomoxys calcitrans]	XP_013118665	1.48841E-122	97.8723	348.977	188	184
GMOY003596-PA	stress-induced-phospho 1	491	gi|89112791|gb|ABD60989.1|Hsp70/Hsp90 organizing protein-like protein [Glossina morsitans morsitans]	ABD60989	0	100	952.199	491	491
GMOY013099-PA	T-complex 1 subunit alpha	555	gi|498950975|ref|XP_004523100.1|T-complex protein 1 subunit alpha [Ceratitis capitata]	XP_004523100	0	98.018	1043.49	555	544
GMOY009918-PA	ATP synthase subunit mitochondrial	99	gi|907678356|ref|XP_013105873.1|PREDICTED: ATP synthase subunit g, mitochondrial [Stomoxys calcitrans]	XP_013105873	1.4814E-55	87.8788	172.555	99	87
GMOY005002-PA	SYS1 homolog	559	gi|499005487|ref|XP_004535590.1|protein SYS1 homolog [Ceratitis capitata]	XP_004535590	1.69747E-36	96.9231	139.043	65	63
GMOY003200-PA	26S protease regulatory subunit 4	1016	gi|1108483317|emb|CRK88438.1|CLUMA_CG002257, isoform A [Clunio marinus]	CRK88438	0	88.6819	1115.91	698	619
GMOY010786-PA	myosin-2 essential light chain isoform X2	143	gi|1036823067|ref|XP_017112923.1|PREDICTED: myosin-2 essential light chain isoform X2 [Drosophila elegans]	XP_017112923	6.76476E-94	97.0588	273.092	136	132
GMOY006235-PA	40S ribosomal S13	151	gi|195107527|ref|XP_001998360.1|uncharacterized protein Dmoj_GI23672 [Drosophila mojavensis]gi|195115669|ref|XP_002002379.1|uncharacterized protein Dmoj_GI13008 [Drosophila mojavensis]gi|195389995|ref|XP_002053654.1|uncharacterized protein Dvir_GJ23232 [Drosophila virilis]gi|557777686|ref|XP_005188477.1|PREDICTED: 40S ribosomal protein S13 [Musca domestica]gi|1060155852|ref|XP_017855548.1|PREDICT…	XP_001998360, XP_002002379, XP_002053654, XP_005188477, XP_017855548, XP_017858873, XP_017954409, EDW11821, EDW13821, EDW67174, KNC31841	8.51408E-107	100	306.22	151	151
GMOY009737-PA	proteasomal ubiquitin receptor ADRM1 homolog isoform X1	410	gi|906466249|gb|KNC27721.1|putative proteasomal ubiquitin receptor ADRM1, partial [Lucilia cuprina]	KNC27721	1.10844E-167	78.5024	481.485	414	325
GMOY008583-PA	40S ribosomal S15Aa	132	gi|17975567|ref|NP_524709.1|ribosomal protein S15Aa, isoform D [Drosophila melanogaster]gi|24641743|ref|NP_727690.1|ribosomal protein S15Aa, isoform A [Drosophila melanogaster]gi|24641747|ref|NP_727692.1|ribosomal protein S15Aa, isoform C [Drosophila melanogaster]gi|24641750|ref|NP_727693.1|ribosomal protein S15Aa, isoform E [Drosophila melanogaster]gi|281360807|ref|NP_001162738.1|ribosomal prote…	NP_524709, NP_727690, NP_727692, NP_727693, NP_001162738, XP_001355532, XP_001966102, XP_001978283, XP_001995555, XP_002011247, XP_002025188, XP_002042922, XP_002057969, XP_002075260, XP_002100454, XP_005186941, XP_013105219, XP_015011341, XP_015045767, XP_015045768, XP_016039179, XP_016039180, XP_016923830, XP_016968125, XP_017086553, XP_017086555, XP_016993331, XP_016993332, XP_017154668, XP_01…	3.9419E-92	100	267.314	130	130
GMOY000175-PA	40S ribosomal S15Aa	89	gi|1227991636|ref|XP_021927597.1|40S ribosomal protein S15Aa [Zootermopsis nevadensis]gi|646709757|gb|KDR15478.1|40S ribosomal protein S15a [Zootermopsis nevadensis]	XP_021927597, KDR15478	1.87801E-61	100	187.963	89	89
GMOY002354-PA	phosphopantothenate--cysteine ligase	306	gi|1135091948|ref|XP_019894895.1|PREDICTED: phosphopantothenate--cysteine ligase [Musca domestica]	XP_019894895	0	96.4052	592.423	306	295
GMOY002231-PA	UBX domain-containing 1	390	gi|906466725|gb|KNC28110.1|hypothetical protein FF38_05261 [Lucilia cuprina]	KNC28110	6.90655E-114	78.012	330.872	332	259
GMOY006557-PA	Proteasome subunit beta type-3	205	gi|906461199|gb|KNC23728.1|Proteasome subunit beta type-3 [Lucilia cuprina]	KNC23728	1.37651E-142	95.122	390.193	205	195
GMOY009014-PA	serologically defined colon cancer antigen 8 homolog isoform X5	1090	gi|907600758|ref|XP_013102387.1|PREDICTED: uncharacterized protein LOC106083699 isoform X3 [Stomoxys calcitrans]	XP_013102387	0	68.1367	837.795	907	618
GMOY010526-PA	sodium-dependent multivitamin transporter	1451	gi|906472080|gb|KNC32275.1|putative sodium-dependent multivitamin transporter [Lucilia cuprina]	KNC32275	0	77.3212	1596.64	1314	1016
GMOY010780-PA	CDV3 homolog	342	gi|557752580|ref|XP_005176038.1|PREDICTED: protein CDV3 homolog [Musca domestica]	XP_005176038	7.95374E-72	76.1134	228.794	247	188
GMOY003078-PA	glia maturation factor beta	138	gi|1048007647|ref|XP_017464562.1|PREDICTED: glia maturation factor beta isoform X1 [Rhagoletis zephyria]	XP_017464562	1.25011E-76	95.935	228.794	123	118
GMOY000799-PA	alanine--glyoxylate aminotransferase mitochondrial isoform X2	515	gi|110611262|gb|ABG77980.1|alanine-glyoxylate transaminase 1 [Glossina morsitans morsitans]	ABG77980	0	99.2683	855.514	410	407
GMOY007659-PA	Ubiquitin-conjugating enzyme E2 N	151	gi|906464498|gb|KNC26317.1|Ubiquitin-conjugating enzyme E2 N [Lucilia cuprina]	KNC26317	8.56783E-109	100	311.227	151	151
GMOY006691-PA	maf THA_448	206	gi|906461602|gb|KNC24050.1|hypothetical protein FF38_11324 [Lucilia cuprina]	KNC24050	6.56134E-121	90.6404	346.28	203	184
GMOY011391-PA	mesencephalic astrocyte-derived neurotrophic factor homolog	224	gi|906465410|gb|KNC27070.1|hypothetical protein FF38_10759 [Lucilia cuprina]	KNC27070	6.99441E-92	91.954	259.996	174	160
GMOY008996-PA	endocuticle structural glyco ABD-4	131	gi|557769666|ref|XP_005184506.1|PREDICTED: endocuticle structural glycoprotein ABD-4 [Musca domestica]	XP_005184506	4.68833E-71	92.3664	214.157	131	121
GMOY010501-PA	endocuticle structural glyco bd-5-like	105	gi|907686718|ref|XP_013107285.1|PREDICTED: endocuticle structural glycoprotein SgAbd-5-like [Stomoxys calcitrans]	XP_013107285	1.55648E-57	86.6667	168.318	105	91
GMOY008298-PA	calcineurin subunit B type 1	163	gi|498967311|ref|XP_004526029.1|calcineurin subunit B type 1 [Ceratitis capitata]gi|557767407|ref|XP_005183393.1|PREDICTED: calcineurin subunit B type 1 [Musca domestica]gi|751456817|ref|XP_011182996.1|PREDICTED: calcineurin subunit B type 1 [Zeugodacus cucurbitae]gi|751779311|ref|XP_011198737.1|PREDICTED: calcineurin subunit B type 1 [Bactrocera dorsalis]gi|907683443|ref|XP_013106898.1|PREDICTED…	XP_004526029, XP_005183393, XP_011182996, XP_011198737, XP_013106898, XP_014095571, XP_017485401, XP_018800837, KNC21991	5.79341E-105	96.25	302.753	160	154
GMOY010810-PA	60S ribosomal L18a	198	gi|498937764|ref|XP_004520736.1|60S ribosomal protein L18a [Ceratitis capitata]	XP_004520736	4.51087E-126	97.7401	357.836	177	173
GMOY004942-PA	triple functional domain	3421	gi|906469005|gb|KNC29898.1|hypothetical protein FF38_13523 [Lucilia cuprina]	KNC29898	0	88.2066	3978.71	2459	2169
GMOY007520-PA	ADP-ribosylation factor 8	186	gi|557772128|ref|XP_005185722.1|PREDICTED: ADP-ribosylation factor-like protein 8 [Musca domestica]	XP_005185722	3.54324E-136	100	383.259	186	186
GMOY003390-PA	NADH dehydrogenase [ubiquinone] 1 alpha subcomplex subunit mitochondrial	397	gi|906465103|gb|KNC26814.1|NADH dehydrogenase [ubiquinone] 1 alpha subcomplex subunit 10, mitochondrial [Lucilia cuprina]	KNC26814	0	88.7218	647.892	399	354
GMOY009874-PA	T-complex 1 subunit eta	543	gi|906466754|gb|KNC28136.1|hypothetical protein FF38_04353 [Lucilia cuprina]	KNC28136	0	97.6923	974.156	520	508
GMOY008956-PA	hypothetical protein FF38_04084	459	gi|906459896|gb|KNC22777.1|hypothetical protein FF38_04084 [Lucilia cuprina]	KNC22777	2.30051E-96	69.2494	301.597	413	286
GMOY011481-PA	methionine-R-sulfoxide reductase B1 isoform X5	64	gi|906460474|gb|KNC23199.1|Methionine-R-sulfoxide reductase B1 [Lucilia cuprina]gi|906466739|gb|KNC28121.1|Methionine-R-sulfoxide reductase B1 [Lucilia cuprina]	KNC23199, KNC28121	1.10376E-27	87.6923	105.916	65	57
GMOY013062-PA	40S ribosomal S21	83	gi|557765719|ref|XP_005182557.1|PREDICTED: 40S ribosomal protein S21 [Musca domestica]gi|907594635|ref|XP_013098350.1|PREDICTED: 40S ribosomal protein S21 [Stomoxys calcitrans]	XP_005182557, XP_013098350	3.4095E-55	98.7952	170.244	83	82
GMOY002766-PA	26S protease regulatory subunit 6B	409	gi|557759313|ref|XP_005179381.1|PREDICTED: 26S protease regulatory subunit 6B [Musca domestica]	XP_005179381	0	99.022	791.571	409	405
GMOY002482-PA	phenylalanine--tRNA ligase beta subunit	598	gi|906475602|gb|KNC34920.1|putative phenylalanine--tRNA ligase beta subunit [Lucilia cuprina]	KNC34920	0	89.6321	1008.44	598	536
GMOY008966-PA	serine protease easter	343	gi|1048071528|ref|XP_017487764.1|PREDICTED: serine protease easter, partial [Rhagoletis zephyria]	XP_017487764	6.31381E-86	65.343	269.626	277	181
GMOY010392-PA	Unc-112-related	706	gi|906462025|gb|KNC24399.1|Unc-112-related protein [Lucilia cuprina]	KNC24399	0	94.4993	1284.24	709	670
GMOY006639-PA	ATP-binding cassette sub-family G member 1 isoform X2	983	gi|755853501|ref|XP_011295336.1|PREDICTED: ATP-binding cassette sub-family G member 1 isoform X1 [Musca domestica]	XP_011295336	0	81.3408	1301.96	895	728
GMOY006249-PA	myc box-dependent-interacting 1 isoform X6	340	gi|1037092780|ref|XP_017106253.1|PREDICTED: myc box-dependent-interacting protein 1 isoform X7 [Drosophila bipectinata]	XP_017106253	8.61982E-163	95.1311	464.537	267	254
GMOY003904-PA	CWF19 2 homolog	813	gi|906470517|gb|KNC31029.1|putative CWF19-like protein 2 [Lucilia cuprina]	KNC31029	0	74.7104	603.594	518	387
GMOY012183-PA	spermine synthase isoform X1	407	gi|557778498|ref|XP_005188878.1|PREDICTED: spermine synthase isoform X2 [Musca domestica]	XP_005188878	0	84.0295	648.662	407	342
GMOY008185-PA	ataxin-10	425	gi|906464291|gb|KNC26148.1|hypothetical protein FF38_12245 [Lucilia cuprina]	KNC26148	6.33989E-180	80.0512	513.457	391	313
GMOY009549-PA	Peptidoglycan-recognition SA	194	gi|907629952|ref|XP_013098815.1|PREDICTED: peptidoglycan-recognition protein SA-like [Stomoxys calcitrans]	XP_013098815	1.41449E-76	77.4566	233.417	173	134
GMOY001814-PA	probable proteasome subunit beta type-2	203	gi|906467516|gb|KNC28741.1|putative proteasome subunit beta type-2 [Lucilia cuprina]	KNC28741	6.2362E-123	91	351.288	200	182
GMOY000270-PA	probable cysteine mitochondrial	754	gi|906467480|gb|KNC28705.1|putative cysteine desulfurase, mitochondrial [Lucilia cuprina]	KNC28705	0	92.5275	790.801	455	421
GMOY009628-PA	trichohyalin isoform X1	511	gi|907606200|ref|XP_013111447.1|PREDICTED: trichohyalin [Stomoxys calcitrans]gi|907606204|ref|XP_013111454.1|PREDICTED: trichohyalin [Stomoxys calcitrans]gi|907606208|ref|XP_013111461.1|PREDICTED: trichohyalin [Stomoxys calcitrans]	XP_013111447, XP_013111454, XP_013111461	2.86656E-12	54.2857	75.8702	105	57
GMOY008035-PA	lariat debranching enzyme	540	gi|906464444|gb|KNC26266.1|hypothetical protein FF38_01169 [Lucilia cuprina]	KNC26266	0	79.304	759.214	546	433
GMOY006957-PA	MLP1 homolog	696	gi|751804824|ref|XP_011212615.1|PREDICTED: uncharacterized protein LOC105232587 [Bactrocera dorsalis]	XP_011212615	2.19468E-7	46.729	41.9726	107	50
GMOY013067-PA	60S ribosomal L8	256	gi|1048054923|ref|XP_017481564.1|PREDICTED: 60S ribosomal protein L8 [Rhagoletis zephyria]gi|1048054925|ref|XP_017481565.1|PREDICTED: 60S ribosomal protein L8 [Rhagoletis zephyria]gi|1048059462|ref|XP_017483158.1|PREDICTED: 60S ribosomal protein L8 [Rhagoletis zephyria]	XP_017481564, XP_017481565, XP_017483158	2.19925E-173	98.7342	471.47	237	234

## Sheet: Glossina_hits_naive
SeqName	Description	Length	#Hits	e-Value	sim mean	#GO	GO IDs	GO Names	Enzyme Codes	Enzyme Names	InterPro IDs	InterPro GO IDs	InterPro GO Names
GMOY012360-PA	Tsal2 form A	475	20	0	56.6	3	F:GO:0003676; F:GO:0046872; F:GO:0016787	F:nucleic acid binding; F:metal ion binding; F:hydrolase activity			IPR001604 (PFAM); G3DSA:3.40.570.10 (GENE3D); PTHR13966 (PANTHER); PTHR13966:SF11 (PANTHER); SSF54060 (SUPERFAMILY)	F:GO:0003676; F:GO:0046872; F:GO:0016787	F:nucleic acid binding; F:metal ion binding; F:hydrolase activity
GMOY012361-PA	deoxyribonuclease I	357	20	2.66252e-96	61.05	3	F:GO:0003676; F:GO:0046872; F:GO:0016787	F:nucleic acid binding; F:metal ion binding; F:hydrolase activity			G3DSA:3.40.570.10 (GENE3D); PTHR13966:SF11 (PANTHER); PTHR13966:SF11 (PANTHER); PTHR13966 (PANTHER); PTHR13966 (PANTHER); SSF54060 (SUPERFAMILY)	no GO terms	no GO terms
GMOY012071-PA	AF259958_1Tsal1 precursor	399	20	0	55.1	3	F:GO:0003676; F:GO:0046872; F:GO:0016787	F:nucleic acid binding; F:metal ion binding; F:hydrolase activity			IPR001604 (SMART); G3DSA:3.40.570.10 (GENE3D); IPR001604 (PFAM); PTHR13966 (PANTHER); PTHR13966:SF11 (PANTHER); SSF54060 (SUPERFAMILY)	F:GO:0003676; F:GO:0046872; F:GO:0016787	F:nucleic acid binding; F:metal ion binding; F:hydrolase activity
GMOY012373-PA	adenosine deaminase CECR1	494	20	0	64.6	2	C:GO:0005615; F:GO:0019239	C:extracellular space; F:deaminase activity			IPR013659 (PFAM); G3DSA:3.20.20.140 (GENE3D); IPR006331 (TIGRFAM); IPR001365 (PFAM); PTHR11409 (PANTHER); PTHR11409:SF39 (PANTHER); cd01321 (CDD); IPR032466 (SUPERFAMILY)	C:GO:0005615; P:GO:0006154; F:GO:0004000; F:GO:0019239	C:extracellular space; P:adenosine catabolic process; F:adenosine deaminase activity; F:deaminase activity
GMOY005442-PA	apolipophorins	3333	20	0	63.65	6	P:GO:0006869; P:GO:0016192; F:GO:0005319; C:GO:0016020; F:GO:0008289; F:GO:0020037	P:lipid transport; P:vesicle-mediated transport; F:lipid transporter activity; C:membrane; F:lipid binding; F:heme binding			IPR001846 (SMART); IPR015255 (SMART); IPR001747 (SMART); G3DSA:2.20.80.10 (GENE3D); IPR001747 (PFAM); IPR001846 (PFAM); IPR015816 (G3DSA:2.30.230.GENE3D); IPR015255 (PFAM); IPR015817 (G3DSA:2.20.50.GENE3D); IPR011030 (G3DSA:1.25.10.GENE3D); PTHR23345:SF28 (PANTHER); PTHR23345 (PANTHER); IPR001747 (PROSITE_PROFILES); IPR001846 (PROSITE_PROFILES); IPR015819 (SUPERFAMILY); IPR011030 (SUPERFAMILY); I…	P:GO:0006869; F:GO:0005319	P:lipid transport; F:lipid transporter activity
GMOY012313-PA	apyrase isoform X1	557	20	0	69.4	4	F:GO:0000166; F:GO:0016788; F:GO:0046872; P:GO:0009166	F:nucleotide binding; F:hydrolase activity, acting on ester bonds; F:metal ion binding; P:nucleotide catabolic process			IPR006179 (PRINTS); IPR029052 (G3DSA:3.60.21.GENE3D); IPR008334 (PFAM); IPR036907 (G3DSA:3.90.780.GENE3D); IPR004843 (PFAM); IPR006179 (PANTHER); PTHR11575:SF32 (PANTHER); cd07409 (CDD); IPR036907 (SUPERFAMILY); IPR029052 (SUPERFAMILY)	P:GO:0009166; F:GO:0016787	P:nucleotide catabolic process; F:hydrolase activity
GMOY012312-PA	apyrase isoform X3	747	20	0	72.75	4	F:GO:0000166; F:GO:0016788; F:GO:0046872; P:GO:0009166	F:nucleotide binding; F:hydrolase activity, acting on ester bonds; F:metal ion binding; P:nucleotide catabolic process			IPR006179 (PRINTS); IPR029052 (G3DSA:3.60.21.GENE3D); mobidb-lite (MOBIDB_LITE); IPR006179 (PANTHER); PTHR11575:SF32 (PANTHER); cd07409 (CDD); IPR029052 (SUPERFAMILY)	P:GO:0009166; F:GO:0016787	P:nucleotide catabolic process; F:hydrolase activity
GMOY002950-PA	venom allergen 3-like	259	20	0	69.2	3	F:GO:0008061; P:GO:0006030; C:GO:0005576	F:chitin binding; P:chitin metabolic process; C:extracellular region			IPR001283 (PRINTS); IPR014044 (SMART); IPR035940 (G3DSA:3.40.33.GENE3D); IPR014044 (PFAM); IPR034763 (PIRSF); PTHR10334:SF320 (PANTHER); IPR001283 (PANTHER); cd05380 (CDD); IPR035940 (SUPERFAMILY)	no GO terms	no GO terms
GMOY012375-PA	adenosine deaminase CECR1	535	20	0	74.8	2	C:GO:0005615; F:GO:0019239	C:extracellular space; F:deaminase activity			G3DSA:3.20.20.140 (GENE3D); IPR001365 (PFAM); IPR013659 (PFAM); IPR006331 (TIGRFAM); PTHR11409 (PANTHER); PTHR11409:SF39 (PANTHER); cd01321 (CDD); IPR032466 (SUPERFAMILY)	C:GO:0005615; P:GO:0006154; F:GO:0004000; F:GO:0019239	C:extracellular space; P:adenosine catabolic process; F:adenosine deaminase activity; F:deaminase activity
GMOY012372-PA	adenosine deaminase CECR1	449	20	0	69.35	2	C:GO:0005615; F:GO:0019239	C:extracellular space; F:deaminase activity			IPR013659 (PFAM); G3DSA:3.20.20.140 (GENE3D); IPR001365 (PFAM); IPR006331 (TIGRFAM); PTHR11409:SF39 (PANTHER); PTHR11409 (PANTHER); cd01321 (CDD); IPR032466 (SUPERFAMILY)	C:GO:0005615; P:GO:0006154; F:GO:0004000; F:GO:0019239	C:extracellular space; P:adenosine catabolic process; F:adenosine deaminase activity; F:deaminase activity
GMOY012374-PA	adenosine deaminase CECR1-like	467	20	4.8959e-146	59.85	6	P:GO:0008283; C:GO:0005615; F:GO:0008083; P:GO:0006154; F:GO:0004000; F:GO:0019239	P:cell proliferation; C:extracellular space; F:growth factor activity; P:adenosine catabolic process; F:adenosine deaminase activity; F:deaminase activity			G3DSA:3.20.20.140 (GENE3D); IPR001365 (PFAM); IPR013659 (PFAM); G3DSA:3.20.20.140 (GENE3D); PTHR11409:SF39 (PANTHER); PTHR11409 (PANTHER); IPR032466 (SUPERFAMILY)	C:GO:0005615; F:GO:0019239	C:extracellular space; F:deaminase activity
GMOY000466-PA	lectin subunit alpha-like	246	20	7.49269e-76	66.75	1	F:GO:0030246	F:carbohydrate binding			IPR001304 (SMART); IPR016186 (G3DSA:3.10.100.GENE3D); IPR001304 (PFAM); IPR016186 (G3DSA:3.10.100.GENE3D); PTHR22802:SF280 (PANTHER); PTHR22802 (PANTHER); PTHR22802:SF280 (PANTHER); PTHR22802 (PANTHER); IPR001304 (PROSITE_PROFILES); IPR001304 (PROSITE_PROFILES); cd00037 (CDD); IPR016187 (SUPERFAMILY); IPR016187 (SUPERFAMILY)	no GO terms	no GO terms
GMOY007736-PA	Phosphoglucomutase	1055	20	0	86.25	10	F:GO:0000287; C:GO:0005634; P:GO:0005975; F:GO:0016868; C:GO:0005737; P:GO:0019509; F:GO:0010309; P:GO:0055114; P:GO:0016310; F:GO:0016301	F:magnesium ion binding; C:nucleus; P:carbohydrate metabolic process; F:intramolecular transferase activity, phosphotransferases; C:cytoplasm; P:L-methionine salvage from methylthioadenosine; F:acireductone dioxygenase [iron(II)-requiring] activity; P:oxidation-reduction process; P:phosphorylation; F:kinase activity	EC:1.13.11; EC:1.13.11.54	Acting on single donors with incorporation of molecular oxygen (oxygenases). The oxygen incorporated need not be derived from O(2); Acireductone dioxygenase (Fe(2+)-requiring)	IPR005841 (PRINTS); IPR005846 (PFAM); IPR005844 (PFAM); IPR036900 (G3DSA:3.30.310.GENE3D); IPR005843 (PFAM); IPR022414 (PFAM); IPR036802 (G3DSA:1.10.135.GENE3D); IPR014746 (G3DSA:3.30.590.GENE3D); IPR004313 (PFAM); G3DSA:3.40.120.10 (GENE3D); G3DSA:3.40.120.10 (GENE3D); IPR014710 (G3DSA:2.60.120.GENE3D); IPR005845 (PFAM); IPR022413 (PFAM); G3DSA:3.40.120.10 (GENE3D); mobidb-lite (MOBIDB_LITE); PT…	P:GO:0005975; F:GO:0016868; F:GO:0003824; F:GO:0016491; P:GO:0019509; F:GO:0010309; P:GO:0055114; F:GO:0016772; P:GO:0071704; F:GO:0016301	P:carbohydrate metabolic process; F:intramolecular transferase activity, phosphotransferases; F:catalytic activity; F:oxidoreductase activity; P:L-methionine salvage from methylthioadenosine; F:acireductone dioxygenase [iron(II)-requiring] activity; P:oxidation-reduction process; F:transferase activity, transferring phosphorus-containing groups; P:organic substance metabolic process; F:kinase act…
GMOY004645-PA	Tubulin alpha-1 chain	450	20	0	99.9	10	F:GO:0005525; P:GO:0007094; C:GO:0005634; C:GO:0005813; C:GO:0048471; F:GO:0003924; F:GO:0005200; P:GO:0019730; C:GO:0000235; P:GO:0007017	F:GTP binding; P:mitotic spindle assembly checkpoint; C:nucleus; C:centrosome; C:perinuclear region of cytoplasm; F:GTPase activity; F:structural constituent of cytoskeleton; P:antimicrobial humoral response; C:astral microtubule; P:microtubule-based process	EC:3.6.1.15	Nucleoside-triphosphate phosphatase	IPR000217 (PRINTS); IPR002452 (PRINTS); IPR018316 (SMART); IPR003008 (SMART); IPR003008 (PFAM); IPR018316 (PFAM); IPR037103 (G3DSA:3.30.1330.GENE3D); G3DSA:1.10.287.600 (GENE3D); IPR036525 (G3DSA:3.40.50.GENE3D); IPR000217 (PANTHER); PTHR11588:SF243 (PANTHER); cd02186 (CDD); IPR036525 (SUPERFAMILY); IPR008280 (SUPERFAMILY)	F:GO:0005525; F:GO:0003924; F:GO:0005200; P:GO:0007017; C:GO:0005874	F:GTP binding; F:GTPase activity; F:structural constituent of cytoskeleton; P:microtubule-based process; C:microtubule
GMOY002613-PA	tubulin alpha-1A chain	450	20	0	99	6	F:GO:0005525; C:GO:0005737; F:GO:0003924; F:GO:0005200; C:GO:0005874; P:GO:0007017	F:GTP binding; C:cytoplasm; F:GTPase activity; F:structural constituent of cytoskeleton; C:microtubule; P:microtubule-based process	EC:3.6.1.15	Nucleoside-triphosphate phosphatase	IPR000217 (PRINTS); IPR002452 (PRINTS); IPR018316 (SMART); IPR003008 (SMART); IPR003008 (PFAM); IPR037103 (G3DSA:3.30.1330.GENE3D); G3DSA:1.10.287.600 (GENE3D); IPR036525 (G3DSA:3.40.50.GENE3D); IPR018316 (PFAM); IPR000217 (PANTHER); PTHR11588:SF243 (PANTHER); cd02186 (CDD); IPR036525 (SUPERFAMILY); IPR008280 (SUPERFAMILY)	F:GO:0005525; F:GO:0003924; F:GO:0005200; C:GO:0005874; P:GO:0007017	F:GTP binding; F:GTPase activity; F:structural constituent of cytoskeleton; C:microtubule; P:microtubule-based process
GMOY005920-PA	Tubulin alpha-4 chain	459	20	0	92.75	18	P:GO:0035044; P:GO:0040016; P:GO:0035046; P:GO:0007052; P:GO:0009792; P:GO:0007422; F:GO:0005200; P:GO:0022008; C:GO:0005886; F:GO:0005525; C:GO:0005634; C:GO:0048471; P:GO:0007417; P:GO:0051298; F:GO:0003924; C:GO:0055028; P:GO:0035038; P:GO:0051028	P:sperm aster formation; P:embryonic cleavage; P:pronuclear migration; P:mitotic spindle organization; P:embryo development ending in birth or egg hatching; P:peripheral nervous system development; F:structural constituent of cytoskeleton; P:neurogenesis; C:plasma membrane; F:GTP binding; C:nucleus; C:perinuclear region of cytoplasm; P:central nervous system development; P:centrosome duplication;…	EC:3.6.1.15	Nucleoside-triphosphate phosphatase	IPR002452 (PRINTS); IPR000217 (PRINTS); IPR003008 (SMART); IPR018316 (SMART); IPR036525 (G3DSA:3.40.50.GENE3D); IPR037103 (G3DSA:3.30.1330.GENE3D); IPR003008 (PFAM); IPR018316 (PFAM); G3DSA:1.10.287.600 (GENE3D); mobidb-lite (MOBIDB_LITE); IPR000217 (PANTHER); PTHR11588:SF265 (PANTHER); cd02186 (CDD); IPR008280 (SUPERFAMILY); IPR036525 (SUPERFAMILY)	F:GO:0005525; F:GO:0003924; F:GO:0005200; P:GO:0007017; C:GO:0005874	F:GTP binding; F:GTPase activity; F:structural constituent of cytoskeleton; P:microtubule-based process; C:microtubule
GMOY006173-PA	14-3-3 zeta isoform X1	248	20	2.02832e-171	99.15	20	F:GO:0019904; F:GO:0042803; P:GO:0007294; P:GO:0007059; P:GO:0008103; P:GO:0046579; P:GO:0008355; P:GO:0006457; F:GO:0008426; C:GO:0005875; C:GO:0005886; P:GO:0045448; C:GO:0031965; C:GO:0045172; P:GO:0010906; C:GO:0005737; F:GO:0046982; P:GO:0070374; P:GO:0040040; P:GO:0050821	F:protein domain specific binding; F:protein homodimerization activity; P:germarium-derived oocyte fate determination; P:chromosome segregation; P:oocyte microtubule cytoskeleton polarization; P:positive regulation of Ras protein signal transduction; P:olfactory learning; P:protein folding; F:protein kinase C inhibitor activity; C:microtubule associated complex; C:plasma membrane; P:mitotic cell …			IPR000308 (PRINTS); IPR023410 (SMART); IPR000308 (PIRSF); IPR036815 (G3DSA:1.20.190.GENE3D); IPR023410 (PFAM); PTHR18860:SF28 (PANTHER); IPR000308 (PANTHER); IPR036815 (SUPERFAMILY)	F:GO:0019904	F:protein domain specific binding
GMOY011657-PA	14-3-3 epsilon	256	20	0	98	22	P:GO:0007095; P:GO:0045927; F:GO:0019904; P:GO:0007280; P:GO:0007088; P:GO:0007294; P:GO:0008340; P:GO:0007411; P:GO:0008103; P:GO:0046579; P:GO:0009411; C:GO:0005694; C:GO:0005875; C:GO:0005886; C:GO:0005654; C:GO:0005813; C:GO:0045172; C:GO:0005737; F:GO:0046982; P:GO:0070374; F:GO:0050815; P:GO:0048190	P:mitotic G2 DNA damage checkpoint; P:positive regulation of growth; F:protein domain specific binding; P:pole cell migration; P:regulation of mitotic nuclear division; P:germarium-derived oocyte fate determination; P:determination of adult lifespan; P:axon guidance; P:oocyte microtubule cytoskeleton polarization; P:positive regulation of Ras protein signal transduction; P:response to UV; C:chrom…			IPR000308 (PRINTS); IPR023410 (SMART); IPR036815 (G3DSA:1.20.190.GENE3D); IPR000308 (PIRSF); IPR023410 (PFAM); mobidb-lite (MOBIDB_LITE); IPR000308 (PANTHER); PTHR18860:SF39 (PANTHER); cd10020 (CDD); IPR036815 (SUPERFAMILY)	F:GO:0019904	F:protein domain specific binding
GMOY004228-PA	transferrin	630	20	0	85.15	4	P:GO:0055072; P:GO:0006811; F:GO:0046872; C:GO:0005576	P:iron ion homeostasis; P:ion transport; F:metal ion binding; C:extracellular region			IPR001156 (PRINTS); IPR001156 (SMART); G3DSA:3.40.190.10 (GENE3D); IPR016357 (PIRSF); IPR001156 (PFAM); G3DSA:3.40.190.10 (GENE3D); G3DSA:3.40.190.10 (GENE3D); PTHR11485 (PANTHER); PTHR11485:SF30 (PANTHER); IPR001156 (PROSITE_PROFILES); IPR001156 (PROSITE_PROFILES); cd13529 (CDD); SSF53850 (SUPERFAMILY); SSF53850 (SUPERFAMILY)	C:GO:0005615	C:extracellular space
GMOY011870-PA	fructose-bisphosphate aldolase isoform X1	364	20	0	90.9	2	P:GO:0006096; F:GO:0004332	P:glycolytic process; F:fructose-bisphosphate aldolase activity	EC:4.1.2.13	Fructose-bisphosphate aldolase	IPR000741 (PFAM); IPR013785 (G3DSA:3.20.20.GENE3D); PTHR11627 (PANTHER); cd00948 (CDD); SSF51569 (SUPERFAMILY)	F:GO:0003824; P:GO:0006096; F:GO:0004332	F:catalytic activity; P:glycolytic process; F:fructose-bisphosphate aldolase activity
GMOY000473-PA	glyceraldehyde 3 phosphate dehydrogenase	333	20	0	96.2	12	C:GO:0005811; C:GO:0030018; F:GO:0050661; F:GO:0051287; P:GO:0006096; P:GO:0007520; P:GO:0055114; C:GO:0031430; P:GO:0006006; F:GO:0004365; P:GO:0007525; C:GO:0005875	C:lipid particle; C:Z disc; F:NADP binding; F:NAD binding; P:glycolytic process; P:myoblast fusion; P:oxidation-reduction process; C:M band; P:glucose metabolic process; F:glyceraldehyde-3-phosphate dehydrogenase (NAD+) (phosphorylating) activity; P:somatic muscle development; C:microtubule associated complex	EC:1.2.1.59; EC:1.2.1.12	Glyceraldehyde-3-phosphate dehydrogenase (NAD(P)(+)) (phosphorylating); Glyceraldehyde-3-phosphate dehydrogenase (phosphorylating)	IPR020831 (PRINTS); IPR020828 (SMART); G3DSA:3.40.50.720 (GENE3D); IPR020828 (PFAM); IPR006424 (TIGRFAM); G3DSA:3.30.360.10 (GENE3D); IPR020829 (PFAM); IPR020831 (PIRSF); IPR020831 (PANTHER); PTHR10836:SF79 (PANTHER); SSF55347 (SUPERFAMILY); IPR036291 (SUPERFAMILY)	F:GO:0050661; F:GO:0051287; P:GO:0055114; P:GO:0006006; F:GO:0016620	F:NADP binding; F:NAD binding; P:oxidation-reduction process; P:glucose metabolic process; F:oxidoreductase activity, acting on the aldehyde or oxo group of donors, NAD or NADP as acceptor
GMOY009322-PA	glyceraldehyde-3-phosphate dehydrogenase	344	20	9.81271e-131	73.3	5	F:GO:0000166; P:GO:0044281; F:GO:0050662; F:GO:0016620; P:GO:0044723	F:nucleotide binding; P:small molecule metabolic process; F:coenzyme binding; F:oxidoreductase activity, acting on the aldehyde or oxo group of donors, NAD or NADP as acceptor; P:single-organism carbohydrate metabolic process			IPR020831 (PRINTS); IPR020828 (SMART); IPR006424 (TIGRFAM); G3DSA:3.30.360.10 (GENE3D); IPR020831 (PIRSF); IPR020828 (PFAM); IPR020829 (PFAM); G3DSA:3.40.50.720 (GENE3D); PTHR10836:SF52 (PANTHER); IPR020831 (PANTHER); IPR036291 (SUPERFAMILY); SSF55347 (SUPERFAMILY)	F:GO:0050661; F:GO:0051287; P:GO:0055114; P:GO:0006006; F:GO:0016620	F:NADP binding; F:NAD binding; P:oxidation-reduction process; P:glucose metabolic process; F:oxidoreductase activity, acting on the aldehyde or oxo group of donors, NAD or NADP as acceptor
GMOY005869-PA	probable trehalose-phosphate phosphatase C	481	20	0	94.2	5	F:GO:0004805; C:GO:0016021; P:GO:0005992; C:GO:0005576; P:GO:0016311	F:trehalose-phosphatase activity; C:integral component of membrane; P:trehalose biosynthetic process; C:extracellular region; P:dephosphorylation	EC:3.1.3.12; EC:3.1.3.41	Trehalose-phosphatase; 4-nitrophenylphosphatase	IPR006977 (PFAM); IPR003337 (TIGRFAM); IPR003337 (PFAM); IPR006379 (TIGRFAM); IPR023214 (G3DSA:3.40.50.GENE3D); PTHR21236:SF1 (PANTHER); PTHR21236 (PANTHER); cd01627 (CDD); IPR036412 (SUPERFAMILY)	F:GO:0003824; C:GO:0016020; P:GO:0005992	F:catalytic activity; C:membrane; P:trehalose biosynthetic process
GMOY013291-PA	phenoloxidase 2-like	689	20	0	88.7	7	F:GO:0016491; F:GO:0046872; F:GO:0008241; C:GO:0016020; P:GO:0006508; P:GO:0055114; F:GO:0008237	F:oxidoreductase activity; F:metal ion binding; F:peptidyl-dipeptidase activity; C:membrane; P:proteolysis; P:oxidation-reduction process; F:metallopeptidase activity	EC:3.4.15	Acting on peptide bonds (peptidases)	IPR013788 (PRINTS); IPR000896 (PFAM); IPR005204 (PFAM); IPR037020 (G3DSA:2.60.40.GENE3D); IPR008922 (G3DSA:1.10.1280.GENE3D); IPR036697 (G3DSA:1.20.1370.GENE3D); IPR005203 (PFAM); PTHR11511:SF24 (PANTHER); IPR013788 (PANTHER); IPR008922 (SUPERFAMILY); IPR036697 (SUPERFAMILY); IPR014756 (SUPERFAMILY)	no GO terms	no GO terms
GMOY013294-PA	phenoloxidase 2-like	684	20	0	87.45	7	F:GO:0016491; F:GO:0046872; F:GO:0008241; C:GO:0016020; P:GO:0006508; P:GO:0055114; F:GO:0008237	F:oxidoreductase activity; F:metal ion binding; F:peptidyl-dipeptidase activity; C:membrane; P:proteolysis; P:oxidation-reduction process; F:metallopeptidase activity	EC:3.4.15	Acting on peptide bonds (peptidases)	IPR013788 (PRINTS); IPR008922 (G3DSA:1.10.1280.GENE3D); IPR036697 (G3DSA:1.20.1370.GENE3D); IPR005203 (PFAM); IPR037020 (G3DSA:2.60.40.GENE3D); IPR000896 (PFAM); IPR005204 (PFAM); PTHR11511:SF24 (PANTHER); IPR013788 (PANTHER); IPR036697 (SUPERFAMILY); IPR008922 (SUPERFAMILY); IPR014756 (SUPERFAMILY)	no GO terms	no GO terms
GMOY007181-PA	hypothetical protein FF38_12685	265	3	4.19376e-06	47.33						IPR036396 (G3DSA:1.10.630.GENE3D)	F:GO:0005506; F:GO:0016705; P:GO:0055114; F:GO:0020037	F:iron ion binding; F:oxidoreductase activity, acting on paired donors, with incorporation or reduction of molecular oxygen; P:oxidation-reduction process; F:heme binding
GMOY001043-PA	chitinase CG5210	480	20	0	87.5	3	F:GO:0004568; P:GO:0005975; P:GO:0006032	F:chitinase activity; P:carbohydrate metabolic process; P:chitin catabolic process	EC:3.2.1.14	Chitinase	IPR011583 (SMART); IPR001223 (PFAM); G3DSA:3.20.20.80 (GENE3D); PTHR11177 (PANTHER); IPR015520 (PTHR11177:PANTHER); IPR015520 (CDD); IPR017853 (SUPERFAMILY); IPR029070 (SUPERFAMILY)	P:GO:0005975; F:GO:0008061	P:carbohydrate metabolic process; F:chitin binding
GMOY010728-PA	phenoloxidase 2	692	20	0	79.3	3	F:GO:0016491; F:GO:0046872; P:GO:0055114	F:oxidoreductase activity; F:metal ion binding; P:oxidation-reduction process			IPR013788 (PRINTS); IPR036697 (G3DSA:1.20.1370.GENE3D); IPR000896 (PFAM); IPR008922 (G3DSA:1.10.1280.GENE3D); IPR005204 (PFAM); IPR037020 (G3DSA:2.60.40.GENE3D); IPR005203 (PFAM); PTHR11511:SF24 (PANTHER); IPR013788 (PANTHER); IPR014756 (SUPERFAMILY); IPR008922 (SUPERFAMILY); IPR036697 (SUPERFAMILY)	no GO terms	no GO terms
GMOY000148-PA	tubulin beta-1 chain	447	20	0	99.15	7	F:GO:0005525; C:GO:0005737; P:GO:0051298; F:GO:0003924; F:GO:0005200; P:GO:0016203; C:GO:0005874	F:GTP binding; C:cytoplasm; P:centrosome duplication; F:GTPase activity; F:structural constituent of cytoskeleton; P:muscle attachment; C:microtubule	EC:3.6.1.15	Nucleoside-triphosphate phosphatase	IPR000217 (PRINTS); IPR002453 (PRINTS); IPR018316 (SMART); IPR003008 (SMART); IPR003008 (PFAM); IPR037103 (G3DSA:3.30.1330.GENE3D); IPR036525 (G3DSA:3.40.50.GENE3D); G3DSA:1.10.287.600 (GENE3D); IPR018316 (PFAM); mobidb-lite (MOBIDB_LITE); IPR000217 (PANTHER); PTHR11588:SF256 (PANTHER); cd02187 (CDD); IPR036525 (SUPERFAMILY); IPR008280 (SUPERFAMILY)	F:GO:0005525; F:GO:0003924; F:GO:0005200; P:GO:0007017; C:GO:0005874	F:GTP binding; F:GTPase activity; F:structural constituent of cytoskeleton; P:microtubule-based process; C:microtubule
GMOY006365-PA	tubulin beta chain isoform X1	437	20	0	97.6	6	F:GO:0005525; C:GO:0005737; P:GO:0051298; F:GO:0003924; F:GO:0005200; C:GO:0005874	F:GTP binding; C:cytoplasm; P:centrosome duplication; F:GTPase activity; F:structural constituent of cytoskeleton; C:microtubule	EC:3.6.1.15	Nucleoside-triphosphate phosphatase	IPR002453 (PRINTS); IPR000217 (PRINTS); IPR003008 (SMART); IPR018316 (SMART); IPR003008 (PFAM); IPR036525 (G3DSA:3.40.50.GENE3D); IPR018316 (PFAM); IPR037103 (G3DSA:3.30.1330.GENE3D); G3DSA:1.10.287.600 (GENE3D); mobidb-lite (MOBIDB_LITE); PTHR11588:SF256 (PANTHER); IPR000217 (PANTHER); cd02187 (CDD); IPR036525 (SUPERFAMILY); IPR008280 (SUPERFAMILY)	F:GO:0005525; F:GO:0003924; F:GO:0005200; C:GO:0005874; P:GO:0007017	F:GTP binding; F:GTPase activity; F:structural constituent of cytoskeleton; C:microtubule; P:microtubule-based process
GMOY000176-PA	Tubulin beta-2 chain	864	20	0	96.4	8	F:GO:0005525; C:GO:0005737; F:GO:0003924; C:GO:0016021; F:GO:0005200; C:GO:0005874; P:GO:0007017; P:GO:0007435	F:GTP binding; C:cytoplasm; F:GTPase activity; C:integral component of membrane; F:structural constituent of cytoskeleton; C:microtubule; P:microtubule-based process; P:salivary gland morphogenesis	EC:3.6.1.15	Nucleoside-triphosphate phosphatase	IPR002453 (PRINTS); IPR000217 (PRINTS); IPR003008 (SMART); IPR018316 (SMART); IPR003008 (PFAM); IPR037103 (G3DSA:3.30.1330.GENE3D); G3DSA:1.10.287.600 (GENE3D); IPR036525 (G3DSA:3.40.50.GENE3D); IPR018316 (PFAM); PTHR11588:SF256 (PANTHER); IPR000217 (PANTHER); IPR000217 (PANTHER); cd02187 (CDD); cd02187 (CDD); IPR008280 (SUPERFAMILY); IPR008280 (SUPERFAMILY); IPR036525 (SUPERFAMILY); IPR036525 (S…	F:GO:0005525; F:GO:0003924; F:GO:0005200; C:GO:0005874; P:GO:0007017	F:GTP binding; F:GTPase activity; F:structural constituent of cytoskeleton; C:microtubule; P:microtubule-based process
GMOY011846-PA	tubulin beta-1 chain	902	20	0	96.25	9	F:GO:0005525; C:GO:0005737; P:GO:0051298; F:GO:0003924; C:GO:0016021; F:GO:0005200; P:GO:0016203; C:GO:0005874; P:GO:0007435	F:GTP binding; C:cytoplasm; P:centrosome duplication; F:GTPase activity; C:integral component of membrane; F:structural constituent of cytoskeleton; P:muscle attachment; C:microtubule; P:salivary gland morphogenesis	EC:3.6.1.15	Nucleoside-triphosphate phosphatase	IPR000217 (PRINTS); IPR002453 (PRINTS); IPR018316 (SMART); IPR003008 (SMART); IPR003008 (PFAM); G3DSA:1.10.287.600 (GENE3D); IPR037103 (G3DSA:3.30.1330.GENE3D); IPR018316 (PFAM); IPR036525 (G3DSA:3.40.50.GENE3D); mobidb-lite (MOBIDB_LITE); IPR000217 (PANTHER); IPR000217 (PANTHER); PTHR11588:SF256 (PANTHER); PTHR11588:SF256 (PANTHER); cd02187 (CDD); cd02187 (CDD); IPR036525 (SUPERFAMILY); IPR03652…	F:GO:0005525; F:GO:0003924; F:GO:0005200; C:GO:0005874; P:GO:0007017	F:GTP binding; F:GTPase activity; F:structural constituent of cytoskeleton; C:microtubule; P:microtubule-based process
GMOY000119-PA	Tubulin beta-2 chain	446	20	0	97.9	8	F:GO:0005525; C:GO:0005737; F:GO:0003924; C:GO:0016021; F:GO:0005200; C:GO:0005874; P:GO:0007017; P:GO:0007435	F:GTP binding; C:cytoplasm; F:GTPase activity; C:integral component of membrane; F:structural constituent of cytoskeleton; C:microtubule; P:microtubule-based process; P:salivary gland morphogenesis	EC:3.6.1.15	Nucleoside-triphosphate phosphatase	IPR000217 (PRINTS); IPR002453 (PRINTS); IPR003008 (SMART); IPR018316 (SMART); IPR036525 (G3DSA:3.40.50.GENE3D); G3DSA:1.10.287.600 (GENE3D); IPR037103 (G3DSA:3.30.1330.GENE3D); IPR018316 (PFAM); IPR003008 (PFAM); mobidb-lite (MOBIDB_LITE); PTHR11588:SF256 (PANTHER); IPR000217 (PANTHER); cd02187 (CDD); IPR036525 (SUPERFAMILY); IPR008280 (SUPERFAMILY)	F:GO:0005525; F:GO:0003924; F:GO:0005200; P:GO:0007017; C:GO:0005874	F:GTP binding; F:GTPase activity; F:structural constituent of cytoskeleton; P:microtubule-based process; C:microtubule
GMOY011788-PA	Tubulin beta-2 chain	1721	20	0	96.85	8	F:GO:0005525; C:GO:0005737; F:GO:0003924; C:GO:0016021; F:GO:0005200; C:GO:0005874; P:GO:0007017; P:GO:0007435	F:GTP binding; C:cytoplasm; F:GTPase activity; C:integral component of membrane; F:structural constituent of cytoskeleton; C:microtubule; P:microtubule-based process; P:salivary gland morphogenesis	EC:3.6.1.15	Nucleoside-triphosphate phosphatase	IPR002453 (PRINTS); IPR000217 (PRINTS); IPR003008 (SMART); IPR018316 (SMART); IPR003008 (PFAM); G3DSA:1.10.287.600 (GENE3D); IPR018316 (PFAM); IPR036525 (G3DSA:3.40.50.GENE3D); IPR037103 (G3DSA:3.30.1330.GENE3D); G3DSA:1.10.287.600 (GENE3D); mobidb-lite (MOBIDB_LITE); PTHR11588:SF256 (PANTHER); PTHR11588:SF256 (PANTHER); PTHR11588:SF256 (PANTHER); IPR000217 (PANTHER); IPR000217 (PANTHER); IPR0002…	F:GO:0005525; F:GO:0003924; F:GO:0005200; P:GO:0007017; C:GO:0005874	F:GTP binding; F:GTPase activity; F:structural constituent of cytoskeleton; P:microtubule-based process; C:microtubule
GMOY009393-PA	Tubulin beta-3 chain	437	20	0	99	10	F:GO:0005525; P:GO:0007507; P:GO:0030537; C:GO:0005737; F:GO:0003924; P:GO:0007411; F:GO:0005200; P:GO:0009416; C:GO:0005874; P:GO:0007017	F:GTP binding; P:heart development; P:larval behavior; C:cytoplasm; F:GTPase activity; P:axon guidance; F:structural constituent of cytoskeleton; P:response to light stimulus; C:microtubule; P:microtubule-based process	EC:3.6.1.15	Nucleoside-triphosphate phosphatase	IPR000217 (PRINTS); IPR002453 (PRINTS); IPR018316 (SMART); IPR003008 (SMART); G3DSA:1.10.287.600 (GENE3D); IPR036525 (G3DSA:3.40.50.GENE3D); IPR003008 (PFAM); IPR018316 (PFAM); IPR037103 (G3DSA:3.30.1330.GENE3D); PTHR11588:SF256 (PANTHER); IPR000217 (PANTHER); cd02187 (CDD); IPR036525 (SUPERFAMILY); IPR008280 (SUPERFAMILY)	F:GO:0005525; F:GO:0003924; F:GO:0005200; C:GO:0005874; P:GO:0007017	F:GTP binding; F:GTPase activity; F:structural constituent of cytoskeleton; C:microtubule; P:microtubule-based process
GMOY008955-PA	murinoglobulin-2-like isoform X1	1553	20	0	72.9	3	C:GO:0005615; F:GO:0004866; P:GO:0010951	C:extracellular space; F:endopeptidase inhibitor activity; P:negative regulation of endopeptidase activity			IPR009048 (SMART); IPR001599 (SMART); IPR011625 (SMART); IPR019565 (PFAM); IPR009048 (PFAM); IPR013783 (G3DSA:2.60.40.GENE3D); IPR011625 (PFAM); IPR013783 (G3DSA:2.60.40.GENE3D); IPR001599 (PFAM); G3DSA:1.50.10.20 (GENE3D); IPR036595 (G3DSA:2.60.40.GENE3D); IPR011626 (PFAM); IPR002890 (PFAM); PTHR11412:SF136 (PANTHER); PTHR11412 (PANTHER); IPR014756 (SUPERFAMILY); IPR008930 (SUPERFAMILY); IPR0365…	C:GO:0005615; F:GO:0004866; C:GO:0005576	C:extracellular space; F:endopeptidase inhibitor activity; C:extracellular region
GMOY010913-PA	Muscle-specific 20	1721	20	9.33136e-108	94.5	5	P:GO:0008360; P:GO:1901739; F:GO:0003779; P:GO:0007520; P:GO:0007155	P:regulation of cell shape; P:regulation of myoblast fusion; F:actin binding; P:myoblast fusion; P:cell adhesion			IPR003096 (PRINTS); IPR001715 (SMART); IPR004045 (PFAM); IPR000557 (PFAM); IPR001715 (PFAM); IPR036872 (G3DSA:1.10.418.GENE3D); G3DSA:1.20.1050.10 (GENE3D); G3DSA:3.40.30.10 (GENE3D),SFLDG00358 (SFLD),SFLDS00019 (SFLD); mobidb-lite (MOBIDB_LITE); mobidb-lite (MOBIDB_LITE); mobidb-lite (MOBIDB_LITE); mobidb-lite (MOBIDB_LITE); mobidb-lite (MOBIDB_LITE); mobidb-lite (MOBIDB_LITE); mobidb-lite (MOBI…	F:GO:0005515	F:protein binding
GMOY001776-PA	muscle	376	20	0	99.25	16	C:GO:0035267; P:GO:0050807; P:GO:0043486; F:GO:0005200; C:GO:0005884; C:GO:0005875; C:GO:0005886; C:GO:0005811; F:GO:0005524; P:GO:0007507; P:GO:0051533; P:GO:0051297; C:GO:0005737; P:GO:0000281; P:GO:0098529; P:GO:0016573	C:NuA4 histone acetyltransferase complex; P:regulation of synapse organization; P:histone exchange; F:structural constituent of cytoskeleton; C:actin filament; C:microtubule associated complex; C:plasma membrane; C:lipid particle; F:ATP binding; P:heart development; P:positive regulation of NFAT protein import into nucleus; P:centrosome organization; C:cytoplasm; P:mitotic cytokinesis; P:neuromus…			IPR004000 (PRINTS); IPR004000 (SMART); G3DSA:3.90.640.10 (GENE3D); G3DSA:3.30.420.40 (GENE3D); G3DSA:3.30.420.40 (GENE3D); IPR004000 (PFAM); G3DSA:3.30.420.40 (GENE3D); IPR004000 (PANTHER); PTHR11937:SF162 (PANTHER); cd00012 (CDD); SSF53067 (SUPERFAMILY); SSF53067 (SUPERFAMILY)	no GO terms	no GO terms
GMOY007085-PA	actin-5C	429	20	0	99.5	17	P:GO:0007291; P:GO:0007010; P:GO:0016319; C:GO:0035060; F:GO:0005200; C:GO:0005884; P:GO:0002121; C:GO:0005875; C:GO:0005811; F:GO:0005524; P:GO:0032507; P:GO:0006338; C:GO:0005737; P:GO:0000281; P:GO:0006909; C:GO:0031011; P:GO:0035148	P:sperm individualization; P:cytoskeleton organization; P:mushroom body development; C:brahma complex; F:structural constituent of cytoskeleton; C:actin filament; P:inter-male aggressive behavior; C:microtubule associated complex; C:lipid particle; F:ATP binding; P:maintenance of protein location in cell; P:chromatin remodeling; C:cytoplasm; P:mitotic cytokinesis; P:phagocytosis; C:Ino80 complex;…			IPR004000 (PRINTS); IPR004000 (SMART); G3DSA:3.30.420.40 (GENE3D); IPR004000 (PFAM); G3DSA:3.90.640.10 (GENE3D); G3DSA:3.30.420.40 (GENE3D); G3DSA:3.30.420.40 (GENE3D); IPR004000 (PANTHER); PTHR11937:SF278 (PANTHER); cd00012 (CDD); SSF53067 (SUPERFAMILY); SSF53067 (SUPERFAMILY)	no GO terms	no GO terms
GMOY008458-PA	muscle	376	20	0	99.1	10	F:GO:0005524; C:GO:0005737; P:GO:0006909; P:GO:0071689; F:GO:0004452; F:GO:0005200; P:GO:0008299; C:GO:0005884; P:GO:0014866; F:GO:0016787	F:ATP binding; C:cytoplasm; P:phagocytosis; P:muscle thin filament assembly; F:isopentenyl-diphosphate delta-isomerase activity; F:structural constituent of cytoskeleton; P:isoprenoid biosynthetic process; C:actin filament; P:skeletal myofibril assembly; F:hydrolase activity	EC:5.3.3.2	Isopentenyl-diphosphate Delta-isomerase	IPR004000 (PRINTS); IPR004000 (SMART); G3DSA:3.90.640.10 (GENE3D); G3DSA:3.30.420.40 (GENE3D); G3DSA:3.30.420.40 (GENE3D); IPR004000 (PFAM); G3DSA:3.30.420.40 (GENE3D); IPR004000 (PANTHER); PTHR11937:SF278 (PANTHER); cd00012 (CDD); SSF53067 (SUPERFAMILY); SSF53067 (SUPERFAMILY)	no GO terms	no GO terms
GMOY002029-PA	V-type proton ATPase subunit B	488	20	0	98.95	11	C:GO:0000221; F:GO:0005524; C:GO:0005769; C:GO:0033181; C:GO:0048471; C:GO:0005903; P:GO:0015991; P:GO:0046034; C:GO:0005829; F:GO:0046961; P:GO:0007035	C:vacuolar proton-transporting V-type ATPase, V1 domain; F:ATP binding; C:early endosome; C:plasma membrane proton-transporting V-type ATPase complex; C:perinuclear region of cytoplasm; C:brush border; P:ATP hydrolysis coupled proton transport; P:ATP metabolic process; C:cytosol; F:proton-transporting ATPase activity, rotational mechanism; P:vacuolar acidification	EC:3.6.1.3; EC:3.6.1.15	Adenosinetriphosphatase; Nucleoside-triphosphate phosphatase	IPR024034 (G3DSA:1.10.1140.GENE3D); G3DSA:3.40.50.300 (GENE3D); IPR005723 (TIGRFAM); IPR022879 (PIRSF); IPR004100 (PFAM); IPR000194 (PFAM); IPR022879 (PANTHER); PTHR43389:SF5 (PANTHER); IPR022879 (HAMAP); cd01135 (CDD); IPR027417 (SUPERFAMILY)	F:GO:0005524; P:GO:0015992; P:GO:0015991; P:GO:0046034; C:GO:0033180; F:GO:0016820	F:ATP binding; P:proton transport; P:ATP hydrolysis coupled proton transport; P:ATP metabolic process; C:proton-transporting V-type ATPase, V1 domain; F:hydrolase activity, acting on acid anhydrides, catalyzing transmembrane movement of substances
GMOY000430-PA	elongation factor 2	844	20	0	98.25	4	F:GO:0005525; F:GO:0003746; F:GO:0003924; P:GO:0006414	F:GTP binding; F:translation elongation factor activity; F:GTPase activity; P:translational elongation	EC:3.6.1.15	Nucleoside-triphosphate phosphatase	IPR000795 (PRINTS); IPR000640 (SMART); IPR005517 (SMART); IPR000795 (PFAM); G3DSA:3.40.50.300 (GENE3D); PF14492 (PFAM); G3DSA:3.90.1430.10 (GENE3D); G3DSA:3.30.70.240 (GENE3D); IPR005517 (PFAM); IPR005225 (TIGRFAM); G3DSA:3.30.70.870 (GENE3D); IPR000640 (PFAM); IPR014721 (G3DSA:3.30.230.GENE3D); IPR004161 (PFAM); G3DSA:2.40.30.10 (GENE3D); PTHR42908:SF10 (PANTHER); PTHR42908 (PANTHER); IPR000795 …	F:GO:0005525; F:GO:0003924	F:GTP binding; F:GTPase activity
GMOY004216-PA	msta	449	20	0	85.55	4	C:GO:0005634; P:GO:0010629; F:GO:0042826; C:GO:0005737	C:nucleus; P:negative regulation of gene expression; F:histone deacetylase binding; C:cytoplasm			IPR001214 (SMART); IPR001214 (PFAM); G3DSA:3.90.1410.10 (GENE3D); PTHR12197:SF176 (PANTHER); PTHR12197 (PANTHER); IPR001214 (PROSITE_PROFILES); SSF82199 (SUPERFAMILY)	F:GO:0005515	F:protein binding
GMOY001525-PA	ATP synthase subunit mitochondrial	507	20	0	96.1	5	C:GO:0045261; F:GO:0005524; P:GO:0015991; P:GO:0015986; F:GO:0046933	C:proton-transporting ATP synthase complex, catalytic core F(1); F:ATP binding; P:ATP hydrolysis coupled proton transport; P:ATP synthesis coupled proton transport; F:proton-transporting ATP synthase activity, rotational mechanism	EC:3.6.1.3; EC:3.6.1.15	Adenosinetriphosphatase; Nucleoside-triphosphate phosphatase	IPR003593 (SMART); IPR024034 (G3DSA:1.10.1140.GENE3D); IPR000194 (PFAM); PIRSF039072 (PIRSF); G3DSA:3.40.50.300 (GENE3D); G3DSA:2.40.10.170 (GENE3D); IPR004100 (PFAM); IPR005722 (TIGRFAM); PTHR15184:SF44 (PANTHER); PTHR15184 (PANTHER); IPR005722 (HAMAP); cd01133 (CDD); IPR036121 (SUPERFAMILY); IPR027417 (SUPERFAMILY); SSF47917 (SUPERFAMILY)	C:GO:0045261; F:GO:0005524; P:GO:0015992; P:GO:0046034; P:GO:0015986; F:GO:0046933	C:proton-transporting ATP synthase complex, catalytic core F(1); F:ATP binding; P:proton transport; P:ATP metabolic process; P:ATP synthesis coupled proton transport; F:proton-transporting ATP synthase activity, rotational mechanism
GMOY007817-PA	ATP synthase subunit mitochondrial	536	20	0	92.25	10	C:GO:0005811; C:GO:0000275; F:GO:0005524; P:GO:0015991; P:GO:0008340; P:GO:0048515; F:GO:0046961; P:GO:0010155; P:GO:0015986; F:GO:0046933	C:lipid particle; C:mitochondrial proton-transporting ATP synthase complex, catalytic core F(1); F:ATP binding; P:ATP hydrolysis coupled proton transport; P:determination of adult lifespan; P:spermatid differentiation; F:proton-transporting ATPase activity, rotational mechanism; P:regulation of proton transport; P:ATP synthesis coupled proton transport; F:proton-transporting ATP synthase activity…	EC:3.6.1.3; EC:3.6.1.15	Adenosinetriphosphatase; Nucleoside-triphosphate phosphatase	IPR003593 (SMART); G3DSA:3.40.50.300 (GENE3D); IPR024034 (G3DSA:1.10.1140.GENE3D); G3DSA:2.40.10.170 (GENE3D); IPR004100 (PFAM); IPR000194 (PFAM); PIRSF039072 (PIRSF); IPR005722 (TIGRFAM); mobidb-lite (MOBIDB_LITE); PTHR15184:SF44 (PANTHER); PTHR15184 (PANTHER); IPR005722 (HAMAP); cd01133 (CDD); IPR027417 (SUPERFAMILY); IPR036121 (SUPERFAMILY); SSF47917 (SUPERFAMILY)	C:GO:0045261; F:GO:0005524; P:GO:0015992; P:GO:0046034; P:GO:0015986; F:GO:0046933	C:proton-transporting ATP synthase complex, catalytic core F(1); F:ATP binding; P:proton transport; P:ATP metabolic process; P:ATP synthesis coupled proton transport; F:proton-transporting ATP synthase activity, rotational mechanism
GMOY002199-PA	elongation factor 1-alpha 1	463	20	0	98	5	F:GO:0005525; F:GO:0003746; C:GO:0005737; F:GO:0003924; P:GO:0006414	F:GTP binding; F:translation elongation factor activity; C:cytoplasm; F:GTPase activity; P:translational elongation	EC:3.6.1.15	Nucleoside-triphosphate phosphatase	IPR000795 (PRINTS); G3DSA:2.40.30.10 (GENE3D); IPR004160 (PFAM); G3DSA:3.40.50.300 (GENE3D); IPR000795 (PFAM); IPR004161 (PFAM); G3DSA:2.40.30.10 (GENE3D); IPR004539 (TIGRFAM); PTHR23115 (PANTHER); PTHR23115:SF227 (PANTHER); IPR004539 (HAMAP); IPR000795 (PROSITE_PROFILES); cd03705 (CDD); cd01883 (CDD); cd03693 (CDD); IPR009000 (SUPERFAMILY); IPR009001 (SUPERFAMILY); IPR027417 (SUPERFAMILY)	F:GO:0005525; F:GO:0003746; C:GO:0005737; F:GO:0003924; P:GO:0006414	F:GTP binding; F:translation elongation factor activity; C:cytoplasm; F:GTPase activity; P:translational elongation
GMOY003371-PA	elongation factor 1-alpha 2	356	20	0	97.4	7	C:GO:0005811; F:GO:0005525; F:GO:0003746; F:GO:0003924; P:GO:0022008; P:GO:0006414; C:GO:0005853	C:lipid particle; F:GTP binding; F:translation elongation factor activity; F:GTPase activity; P:neurogenesis; P:translational elongation; C:eukaryotic translation elongation factor 1 complex	EC:3.6.1.15	Nucleoside-triphosphate phosphatase	IPR000795 (PRINTS); IPR000795 (PFAM); G3DSA:2.40.30.10 (GENE3D); IPR004161 (PFAM); G3DSA:3.40.50.300 (GENE3D); IPR004539 (TIGRFAM); PTHR23115:SF227 (PANTHER); PTHR23115 (PANTHER); IPR000795 (PROSITE_PROFILES); cd03693 (CDD); cd01883 (CDD); IPR009000 (SUPERFAMILY); IPR027417 (SUPERFAMILY)	F:GO:0005525; F:GO:0003746; C:GO:0005737; F:GO:0003924; P:GO:0006414	F:GTP binding; F:translation elongation factor activity; C:cytoplasm; F:GTPase activity; P:translational elongation
GMOY000749-PA	elongation factor 1-alpha 2	163	20	8.53654e-78	99.1	5	F:GO:0005525; F:GO:0003746; C:GO:0005737; F:GO:0003924; P:GO:0006414	F:GTP binding; F:translation elongation factor activity; C:cytoplasm; F:GTPase activity; P:translational elongation	EC:3.6.1.15	Nucleoside-triphosphate phosphatase	G3DSA:2.40.30.10 (GENE3D); IPR004160 (PFAM); PTHR44830 (PANTHER); cd03705 (CDD); IPR009001 (SUPERFAMILY)	no GO terms	no GO terms
GMOY011230-PA	delta-1-pyrroline-5-carboxylate mitochondrial	580	20	0	88.3	5	F:GO:0003842; P:GO:0006537; P:GO:0006561; P:GO:0055114; F:GO:0016620	F:1-pyrroline-5-carboxylate dehydrogenase activity; P:glutamate biosynthetic process; P:proline biosynthetic process; P:oxidation-reduction process; F:oxidoreductase activity, acting on the aldehyde or oxo group of donors, NAD or NADP as acceptor	EC:1.5.1.12	Acting on the CH-NH group of donors	G3DSA:3.40.309.10 (GENE3D); IPR005931 (TIGRFAM); IPR015590 (PFAM); IPR016162 (G3DSA:3.40.605.GENE3D); PTHR42862 (PANTHER); IPR005931 (CDD); IPR016161 (SUPERFAMILY)	F:GO:0003842; F:GO:0016491; P:GO:0008152; P:GO:0055114; P:GO:0010133	F:1-pyrroline-5-carboxylate dehydrogenase activity; F:oxidoreductase activity; P:metabolic process; P:oxidation-reduction process; P:proline catabolic process to glutamate
GMOY003788-PA	---NA---	948									mobidb-lite (MOBIDB_LITE)	no GO terms	no GO terms
GMOY006145-PA	filamin-A isoform X2	2365	20	0	76.1	20	C:GO:0070938; C:GO:0035183; P:GO:0008045; P:GO:0008340; P:GO:0008104; P:GO:0008302; P:GO:0030708; C:GO:0045179; P:GO:0007067; P:GO:0008355; C:GO:0035182; P:GO:0048149; C:GO:0005884; F:GO:0051015; P:GO:0007616; C:GO:0005634; C:GO:0048471; C:GO:0005829; P:GO:0030431; P:GO:0035204	C:contractile ring; C:female germline ring canal inner rim; P:motor neuron axon guidance; P:determination of adult lifespan; P:protein localization; P:female germline ring canal formation, actin assembly; P:germarium-derived female germ-line cyst encapsulation; C:apical cortex; P:mitotic nuclear division; P:olfactory learning; C:female germline ring canal outer rim; P:behavioral response to ethan…			IPR001298 (SMART); IPR001715 (SMART); IPR013783 (G3DSA:2.60.40.GENE3D); IPR013783 (G3DSA:2.60.40.GENE3D); IPR013783 (G3DSA:2.60.40.GENE3D); IPR013783 (G3DSA:2.60.40.GENE3D); IPR013783 (G3DSA:2.60.40.GENE3D); IPR036872 (G3DSA:1.10.418.GENE3D); IPR001715 (PFAM); IPR017868 (PFAM); PTHR43998:SF2 (PANTHER); PTHR43998 (PANTHER); IPR017868 (PROSITE_PROFILES); IPR017868 (PROSITE_PROFILES); IPR017868 (PRO…	F:GO:0005515	F:protein binding
GMOY002443-PA	serine protease inhibitor 4	478	20	0	73.95	3	C:GO:0005615; P:GO:0006508; F:GO:0008233	C:extracellular space; P:proteolysis; F:peptidase activity			IPR023796 (SMART); G3DSA:3.30.497.10 (GENE3D); IPR023796 (PFAM); G3DSA:2.30.39.10 (GENE3D); G3DSA:2.10.310.10 (GENE3D); IPR000215 (PANTHER); PTHR11461:SF206 (PANTHER); PTHR11461:SF206 (PANTHER); cd00172 (CDD); IPR036186 (SUPERFAMILY)	C:GO:0005615	C:extracellular space
GMOY003287-PA	eukaryotic initiation factor 4A isoform X1	538	20	0	98.1	4	F:GO:0003743; F:GO:0005524; F:GO:0004386; P:GO:0006413	F:translation initiation factor activity; F:ATP binding; F:helicase activity; P:translational initiation	EC:3.6.1.15	Nucleoside-triphosphate phosphatase	IPR001650 (SMART); IPR014001 (SMART); IPR009044 (G3DSA:2.30.31.GENE3D); IPR001650 (PFAM); IPR003173 (PFAM); G3DSA:3.40.50.300 (GENE3D); G3DSA:3.40.50.300 (GENE3D); IPR011545 (PFAM); mobidb-lite (MOBIDB_LITE); PTHR24031:SF226 (PANTHER); PTHR24031 (PANTHER); IPR014001 (PROSITE_PROFILES); IPR001650 (PROSITE_PROFILES); IPR014014 (PROSITE_PROFILES); cd00268 (CDD); IPR001650 (CDD); IPR009044 (SUPERFAMI…	F:GO:0003676; F:GO:0003677; F:GO:0005524; F:GO:0003713; P:GO:0006355	F:nucleic acid binding; F:DNA binding; F:ATP binding; F:transcription coactivator activity; P:regulation of transcription, DNA-templated
GMOY002522-PA	eukaryotic initiation factor 4A-III	400	20	0	98.25	21	F:GO:0002094; P:GO:0046579; P:GO:0008299; P:GO:0006325; P:GO:0006413; P:GO:0006974; P:GO:0006744; F:GO:0004004; P:GO:0000398; F:GO:0003743; F:GO:0005524; C:GO:0031305; F:GO:0005515; C:GO:0071013; C:GO:0071011; C:GO:0045495; P:GO:0045451; P:GO:0070374; P:GO:0010468; P:GO:0010501; P:GO:1903040	F:polyprenyltransferase activity; P:positive regulation of Ras protein signal transduction; P:isoprenoid biosynthetic process; P:chromatin organization; P:translational initiation; P:cellular response to DNA damage stimulus; P:ubiquinone biosynthetic process; F:ATP-dependent RNA helicase activity; P:mRNA splicing, via spliceosome; F:translation initiation factor activity; F:ATP binding; C:integra…	EC:3.6.1.3; EC:3.6.1.15	Adenosinetriphosphatase; Nucleoside-triphosphate phosphatase	IPR014001 (SMART); IPR001650 (SMART); IPR011545 (PFAM); IPR001650 (PFAM); G3DSA:3.40.50.300 (GENE3D); G3DSA:3.40.50.300 (GENE3D); PTHR24031 (PANTHER); PTHR24031:SF57 (PANTHER); IPR001650 (PROSITE_PROFILES); IPR014001 (PROSITE_PROFILES); IPR014014 (PROSITE_PROFILES); cd00268 (CDD); IPR001650 (CDD); IPR027417 (SUPERFAMILY)	F:GO:0003676; F:GO:0005524	F:nucleic acid binding; F:ATP binding
GMOY003093-PA	nitric oxide synthase	1308	20	0	88.75	9	F:GO:0005516; F:GO:0050661; F:GO:0004517; F:GO:0010181; F:GO:0005506; F:GO:0050660; P:GO:0055114; P:GO:0006809; F:GO:0020037	F:calmodulin binding; F:NADP binding; F:nitric-oxide synthase activity; F:FMN binding; F:iron ion binding; F:flavin adenine dinucleotide binding; P:oxidation-reduction process; P:nitric oxide biosynthetic process; F:heme binding	EC:1.14.13.39; EC:1.14.13	Nitric-oxide synthase (NADPH); Acting on paired donors, with incorporation or reduction of molecular oxygen. The oxygen incorporated need not be derived from O(2)	IPR001709 (PRINTS); IPR001094 (PRINTS); IPR029039 (G3DSA:3.40.50.GENE3D); IPR008254 (PFAM); IPR012144 (PIRSF); IPR003097 (PFAM); IPR004030 (PFAM); G3DSA:1.20.990.10 (GENE3D); G3DSA:2.40.30.10 (GENE3D); G3DSA:3.90.340.10 (GENE3D); G3DSA:3.90.1230.10 (GENE3D); IPR001433 (PFAM); G3DSA:3.40.50.80 (GENE3D); mobidb-lite (MOBIDB_LITE); mobidb-lite (MOBIDB_LITE); mobidb-lite (MOBIDB_LITE); PTHR19384:SF76…	F:GO:0050661; F:GO:0005516; F:GO:0010181; F:GO:0004517; F:GO:0016491; F:GO:0050660; F:GO:0005506; P:GO:0055114; P:GO:0006809; F:GO:0020037	F:NADP binding; F:calmodulin binding; F:FMN binding; F:nitric-oxide synthase activity; F:oxidoreductase activity; F:flavin adenine dinucleotide binding; F:iron ion binding; P:oxidation-reduction process; P:nitric oxide biosynthetic process; F:heme binding
GMOY001238-PA	gelsolin isoform X1	794	20	0	80.85	5	P:GO:0051016; P:GO:0051014; F:GO:0003779; F:GO:0005509; P:GO:0045010	P:barbed-end actin filament capping; P:actin filament severing; F:actin binding; F:calcium ion binding; P:actin nucleation			IPR007122 (PRINTS); IPR007122 (SMART); IPR029006 (G3DSA:3.40.20.GENE3D); IPR029006 (G3DSA:3.40.20.GENE3D); IPR007123 (PFAM); IPR029006 (G3DSA:3.40.20.GENE3D); mobidb-lite (MOBIDB_LITE); IPR007122 (PANTHER); IPR030004 (PTHR11977:PANTHER); cd11290 (CDD); cd11292 (CDD); cd11289 (CDD); cd11291 (CDD); SSF55753 (SUPERFAMILY); SSF55753 (SUPERFAMILY); SSF55753 (SUPERFAMILY); SSF55753 (SUPERFAMILY); SSF55…	F:GO:0051015; P:GO:0051016; P:GO:0051014; P:GO:0045010; F:GO:0005509	F:actin filament binding; P:barbed-end actin filament capping; P:actin filament severing; P:actin nucleation; F:calcium ion binding
GMOY005378-PA	alanine aminotransferase 1	546	20	0	78.05	5	F:GO:0030170; F:GO:0003824; C:GO:0005739; C:GO:0005829; P:GO:0009058	F:pyridoxal phosphate binding; F:catalytic activity; C:mitochondrion; C:cytosol; P:biosynthetic process			IPR015422 (G3DSA:3.90.1150.GENE3D); IPR015421 (G3DSA:3.40.640.GENE3D); IPR004839 (PFAM); PTHR11751:SF29 (PANTHER); PTHR11751 (PANTHER); PS51257 (PROSITE_PROFILES); cd00609 (CDD); IPR015424 (SUPERFAMILY)	F:GO:0030170; F:GO:0003824; P:GO:0009058	F:pyridoxal phosphate binding; F:catalytic activity; P:biosynthetic process
GMOY003216-PA	heat shock 70 kDa cognate 3	657	20	0	97.05	1	F:GO:0005524	F:ATP binding			IPR013126 (PRINTS); IPR029048 (G3DSA:1.20.1270.GENE3D); G3DSA:3.30.420.40 (GENE3D); G3DSA:3.30.420.40 (GENE3D); IPR013126 (PFAM); G3DSA:3.30.420.40 (GENE3D); G3DSA:3.90.640.10 (GENE3D); IPR029047 (G3DSA:2.60.34.GENE3D); mobidb-lite (MOBIDB_LITE); PTHR19375 (PANTHER); PTHR19375:SF157 (PANTHER); cd10241 (CDD); SSF53067 (SUPERFAMILY); IPR029047 (SUPERFAMILY); IPR029048 (SUPERFAMILY); SSF53067 (SUPER…	no GO terms	no GO terms
GMOY012049-PA	heat shock 70 kDa cognate 4	652	20	0	98	1	F:GO:0005524	F:ATP binding			IPR013126 (PRINTS); G3DSA:3.90.640.10 (GENE3D); G3DSA:3.30.420.40 (GENE3D); IPR013126 (PFAM); IPR029048 (G3DSA:1.20.1270.GENE3D); G3DSA:3.30.420.40 (GENE3D); IPR029047 (G3DSA:2.60.34.GENE3D); mobidb-lite (MOBIDB_LITE); PTHR19375:SF310 (PANTHER); PTHR19375 (PANTHER); cd10233 (CDD); IPR029048 (SUPERFAMILY); SSF53067 (SUPERFAMILY); IPR029047 (SUPERFAMILY); SSF53067 (SUPERFAMILY)	no GO terms	no GO terms
GMOY009493-PA	heat shock 68	640	20	0	94.1	1	F:GO:0005524	F:ATP binding			IPR013126 (PRINTS); IPR029048 (G3DSA:1.20.1270.GENE3D); G3DSA:3.30.420.40 (GENE3D); IPR029047 (G3DSA:2.60.34.GENE3D); G3DSA:3.30.420.40 (GENE3D); IPR013126 (PFAM); mobidb-lite (MOBIDB_LITE); PTHR19375 (PANTHER); PTHR19375:SF210 (PANTHER); cd10233 (CDD); IPR029047 (SUPERFAMILY); SSF53067 (SUPERFAMILY); SSF53067 (SUPERFAMILY); IPR029048 (SUPERFAMILY)	no GO terms	no GO terms
GMOY004286-PA	heat shock 70 kDa cognate 1	639	20	0	96.1	2	C:GO:0005634; F:GO:0005524	C:nucleus; F:ATP binding			IPR013126 (PRINTS); IPR013126 (PFAM); IPR029048 (G3DSA:1.20.1270.GENE3D); G3DSA:3.90.640.10 (GENE3D); G3DSA:3.30.420.40 (GENE3D); IPR029047 (G3DSA:2.60.34.GENE3D); G3DSA:3.30.420.40 (GENE3D); mobidb-lite (MOBIDB_LITE); PTHR19375:SF310 (PANTHER); PTHR19375 (PANTHER); cd10233 (CDD); IPR029047 (SUPERFAMILY); SSF53067 (SUPERFAMILY); SSF53067 (SUPERFAMILY); IPR029048 (SUPERFAMILY)	no GO terms	no GO terms
GMOY009495-PA	heat shock 68	619	20	0	84.25	1	F:GO:0005524	F:ATP binding			IPR013126 (PRINTS); IPR013126 (PFAM); IPR029047 (G3DSA:2.60.34.GENE3D); G3DSA:3.30.420.40 (GENE3D); IPR029048 (G3DSA:1.20.1270.GENE3D); G3DSA:3.30.420.40 (GENE3D); PTHR19375:SF210 (PANTHER); PTHR19375 (PANTHER); SSF53067 (SUPERFAMILY); IPR029047 (SUPERFAMILY); SSF53067 (SUPERFAMILY); IPR029048 (SUPERFAMILY)	no GO terms	no GO terms
GMOY011568-PA	heat shock 68	318	20	9.6172e-141	71	10	C:GO:0005811; F:GO:0000166; P:GO:0031427; P:GO:0008340; C:GO:0005739; P:GO:0042594; F:GO:0051082; P:GO:0022008; P:GO:0006457; C:GO:0005875	C:lipid particle; F:nucleotide binding; P:response to methotrexate; P:determination of adult lifespan; C:mitochondrion; P:response to starvation; F:unfolded protein binding; P:neurogenesis; P:protein folding; C:microtubule associated complex			IPR029048 (G3DSA:1.20.1270.GENE3D); G3DSA:3.30.420.40 (GENE3D); IPR029047 (G3DSA:2.60.34.GENE3D); IPR013126 (PFAM); IPR029047 (G3DSA:2.60.34.GENE3D); IPR029048 (G3DSA:1.20.1270.GENE3D); PTHR19375 (PANTHER); PTHR19375 (PANTHER); PTHR19375:SF309 (PANTHER); PTHR19375:SF309 (PANTHER); SSF53067 (SUPERFAMILY); IPR029048 (SUPERFAMILY); IPR029047 (SUPERFAMILY)	no GO terms	no GO terms
GMOY004931-PA	CUB and LDLa isoform A	1391	20	0	81.1	5	C:GO:0005769; P:GO:0045494; P:GO:0046154; C:GO:0016021; P:GO:0006897	C:early endosome; P:photoreceptor cell maintenance; P:rhodopsin metabolic process; C:integral component of membrane; P:endocytosis			IPR024084 (SMART); IPR002172 (SMART); IPR000859 (SMART); IPR004790 (TIGRFAM); IPR024084 (PFAM); G3DSA:4.10.1220.10 (GENE3D); IPR035914 (G3DSA:2.60.120.GENE3D); IPR002172 (PFAM); G3DSA:3.40.718.10 (GENE3D); IPR035914 (G3DSA:2.60.120.GENE3D); G3DSA:4.10.400.10 (GENE3D); mobidb-lite (MOBIDB_LITE); mobidb-lite (MOBIDB_LITE); mobidb-lite (MOBIDB_LITE); mobidb-lite (MOBIDB_LITE); mobidb-lite (MOBIDB_LI…	F:GO:0005515; F:GO:0016616; F:GO:0004450; P:GO:0006102; P:GO:0055114	F:protein binding; F:oxidoreductase activity, acting on the CH-OH group of donors, NAD or NADP as acceptor; F:isocitrate dehydrogenase (NADP+) activity; P:isocitrate metabolic process; P:oxidation-reduction process
GMOY004732-PA	pyruvate mitochondrial isoform X1	735	20	0	95.95	11	C:GO:0005811; F:GO:0003677; F:GO:0005524; P:GO:0006094; C:GO:0005759; F:GO:0004736; F:GO:0046872; F:GO:0009374; F:GO:0004075; P:GO:0006090; C:GO:0005875	C:lipid particle; F:DNA binding; F:ATP binding; P:gluconeogenesis; C:mitochondrial matrix; F:pyruvate carboxylase activity; F:metal ion binding; F:biotin binding; F:biotin carboxylase activity; P:pyruvate metabolic process; C:microtubule associated complex	EC:6.4.1.1; EC:6.3.4.14	Pyruvate carboxylase; Biotin carboxylase	IPR005482 (SMART); G3DSA:3.40.50.20 (GENE3D); IPR005482 (PFAM); IPR005930 (TIGRFAM); G3DSA:3.10.600.10 (GENE3D); IPR013785 (G3DSA:3.20.20.GENE3D); IPR013815 (G3DSA:3.30.1490.GENE3D); G3DSA:3.30.470.20 (GENE3D); IPR005479 (PFAM); IPR005481 (PFAM); PTHR43778 (PANTHER); IPR000891 (PROSITE_PROFILES); IPR011764 (PROSITE_PROFILES); IPR011761 (PROSITE_PROFILES); cd07937 (CDD); SSF51569 (SUPERFAMILY); SS…	P:GO:0006094; F:GO:0005524; F:GO:0004736; F:GO:0003824; F:GO:0046872; F:GO:0009374; F:GO:0004075; P:GO:0006090	P:gluconeogenesis; F:ATP binding; F:pyruvate carboxylase activity; F:catalytic activity; F:metal ion binding; F:biotin binding; F:biotin carboxylase activity; P:pyruvate metabolic process
GMOY013307-PA	Gmfb8	218	1	4.37599e-125	99						no IPS match	no IPS match	no IPS match
GMOY013075-PA	Gmfb8	218	1	3.15536e-98	88						G3DSA:1.10.486.10 (GENE3D)	no GO terms	no GO terms
GMOY004953-PA	phosphoribosylformylglycinamidine synthase	1148	20	0	81.35	3	C:GO:0005737; P:GO:0006189; F:GO:0004642	C:cytoplasm; P:'de novo' IMP biosynthetic process; F:phosphoribosylformylglycinamidine synthase activity	EC:6.3.5.3	Phosphoribosylformylglycinamidine synthase	IPR010073 (TIGRFAM); IPR016188 (PFAM); IPR036676 (G3DSA:3.90.650.GENE3D); IPR036921 (G3DSA:3.30.1330.GENE3D); IPR010918 (PFAM); IPR036921 (G3DSA:3.30.1330.GENE3D); PF13507 (PFAM); PTHR10099:SF1 (PANTHER); PTHR10099 (PANTHER); cd02204 (CDD); cd02203 (CDD); IPR036676 (SUPERFAMILY); IPR036604 (SUPERFAMILY); IPR036676 (SUPERFAMILY); SSF109736 (SUPERFAMILY); IPR036921 (SUPERFAMILY); IPR036921 (SUPERFA…	P:GO:0006189; F:GO:0004642	P:'de novo' IMP biosynthetic process; F:phosphoribosylformylglycinamidine synthase activity
GMOY002000-PA	glutathione S-transferase D1	250	20	1.6209e-128	93.3	2	F:GO:0004364; F:GO:0018833	F:glutathione transferase activity; F:DDT-dehydrochlorinase activity	EC:2.5.1.18; EC:4.5.1.1	Glutathione transferase; DDT-dehydrochlorinase	IPR004045 (PFAM); G3DSA:3.40.30.10 (GENE3D); G3DSA:1.20.1050.10 (GENE3D); IPR004046 (PFAM); PTHR43969 (PANTHER); PTHR43969:SF2 (PANTHER); IPR010987 (PROSITE_PROFILES); IPR004045 (PROSITE_PROFILES); cd03045 (CDD); cd03177 (CDD); IPR036249 (SUPERFAMILY); IPR036282 (SUPERFAMILY)	F:GO:0005515	F:protein binding
GMOY003513-PA	probable citrate mitochondrial	470	20	0	93.8	5	P:GO:0005975; F:GO:0004108; C:GO:0005759; P:GO:0006099; C:GO:0005875	P:carbohydrate metabolic process; F:citrate (Si)-synthase activity; C:mitochondrial matrix; P:tricarboxylic acid cycle; C:microtubule associated complex	EC:2.3.3.1	Citrate (Si)-synthase	IPR002020 (PRINTS); IPR002020 (PFAM); IPR016142 (G3DSA:1.10.580.GENE3D); IPR016142 (G3DSA:1.10.580.GENE3D); IPR010109 (TIGRFAM); IPR016143 (G3DSA:1.10.230.GENE3D); PTHR11739:SF8 (PANTHER); IPR002020 (PANTHER); cd06105 (CDD); IPR036969 (SUPERFAMILY)	F:GO:0004108; P:GO:0006101; F:GO:0046912	F:citrate (Si)-synthase activity; P:citrate metabolic process; F:transferase activity, transferring acyl groups, acyl groups converted into alkyl on transfer
GMOY004037-PA	serine cytosolic isoform X1	575	20	0	90.35	7	F:GO:0030170; P:GO:0006563; F:GO:0004372; P:GO:0035999; F:GO:0008168; P:GO:0006544; P:GO:0032259	F:pyridoxal phosphate binding; P:L-serine metabolic process; F:glycine hydroxymethyltransferase activity; P:tetrahydrofolate interconversion; F:methyltransferase activity; P:glycine metabolic process; P:methylation	EC:2.1.2.1	Glycine hydroxymethyltransferase	IPR015421 (G3DSA:3.40.640.GENE3D); IPR015422 (G3DSA:3.90.1150.GENE3D); PF00464 (PFAM); PTHR11680 (PANTHER); PTHR11680:SF17 (PANTHER); IPR001085 (CDD); IPR015424 (SUPERFAMILY)	F:GO:0003824; P:GO:0035999; F:GO:0004372; P:GO:0006545	F:catalytic activity; P:tetrahydrofolate interconversion; F:glycine hydroxymethyltransferase activity; P:glycine biosynthetic process
GMOY003727-PA	serine cytosolic isoform X2	302	20	7.40126e-107	65.85	3	P:GO:0009069; F:GO:0016741; P:GO:0006730	P:serine family amino acid metabolic process; F:transferase activity, transferring one-carbon groups; P:one-carbon metabolic process			IPR015421 (G3DSA:3.40.640.GENE3D); PF00464 (PFAM); IPR015422 (G3DSA:3.90.1150.GENE3D); PTHR11680 (PANTHER); PTHR11680:SF17 (PANTHER); PTHR11680:SF17 (PANTHER); PTHR11680 (PANTHER); PTHR11680:SF17 (PANTHER); PTHR11680 (PANTHER); IPR015424 (SUPERFAMILY)	F:GO:0003824	F:catalytic activity
GMOY006777-PA	pyruvate kinase isoform X1	504	20	0	88.9	5	F:GO:0000287; F:GO:0004743; F:GO:0030955; P:GO:0006096; F:GO:0016301	F:magnesium ion binding; F:pyruvate kinase activity; F:potassium ion binding; P:glycolytic process; F:kinase activity	EC:2.7.1.40	Pyruvate kinase	IPR001697 (PRINTS); IPR015793 (PFAM); G3DSA:3.20.20.60 (GENE3D); IPR001697 (TIGRFAM); IPR015795 (PFAM); G3DSA:3.20.20.60 (GENE3D); G3DSA:2.40.33.10 (GENE3D); IPR036918 (G3DSA:3.40.1380.GENE3D); PTHR11817:SF23 (PANTHER); IPR001697 (PANTHER); IPR015813 (SUPERFAMILY); IPR036918 (SUPERFAMILY); IPR011037 (SUPERFAMILY)	F:GO:0000287; F:GO:0004743; F:GO:0030955; F:GO:0003824; P:GO:0006096	F:magnesium ion binding; F:pyruvate kinase activity; F:potassium ion binding; F:catalytic activity; P:glycolytic process
GMOY012268-PA	SGP1_GLOMM ame: Full=Glycine glutamate-rich sgp1 Flags: Precursor	106	1	1.36381e-19	97	1	C:GO:0005576	C:extracellular region			mobidb-lite (MOBIDB_LITE)	no GO terms	no GO terms
GMOY003934-PA	probable aconitate mitochondrial	900	20	0	92.15	6	C:GO:0005811; F:GO:0046872; C:GO:0005739; P:GO:0006099; F:GO:0051539; F:GO:0003994	C:lipid particle; F:metal ion binding; C:mitochondrion; P:tricarboxylic acid cycle; F:4 iron, 4 sulfur cluster binding; F:aconitate hydratase activity	EC:4.2.1.3	Aconitate hydratase	IPR001030 (PRINTS); IPR001030 (PFAM); IPR015931 (G3DSA:3.30.499.GENE3D); IPR000573 (PFAM); IPR006248 (TIGRFAM); IPR015932 (G3DSA:3.40.1060.GENE3D); IPR015931 (G3DSA:3.30.499.GENE3D); IPR015928 (G3DSA:3.20.19.GENE3D); mobidb-lite (MOBIDB_LITE); PTHR43160:SF3 (PANTHER); PTHR43160 (PANTHER); cd01578 (CDD); cd01584 (CDD); SSF52016 (SUPERFAMILY); IPR036008 (SUPERFAMILY)	P:GO:0008152; P:GO:0006099; F:GO:0051539; F:GO:0003994	P:metabolic process; P:tricarboxylic acid cycle; F:4 iron, 4 sulfur cluster binding; F:aconitate hydratase activity
GMOY006294-PA	delta-1-pyrroline-5-carboxylate synthase	760	20	0	90.8	6	F:GO:0004349; C:GO:0005737; F:GO:0004350; P:GO:0006561; P:GO:0055114; P:GO:0016310	F:glutamate 5-kinase activity; C:cytoplasm; F:glutamate-5-semialdehyde dehydrogenase activity; P:proline biosynthetic process; P:oxidation-reduction process; P:phosphorylation	EC:1.2.1.41; EC:2.7.2.11	Glutamate-5-semialdehyde dehydrogenase; Glutamate 5-kinase	IPR001057 (PRINTS); IPR005715 (TIGRFAM); IPR036393 (G3DSA:3.40.1160.GENE3D); IPR015590 (PFAM); IPR016162 (G3DSA:3.40.605.GENE3D); IPR016162 (G3DSA:3.40.605.GENE3D); IPR005766 (PIRSF); IPR000965 (TIGRFAM); IPR001048 (PFAM); IPR005766 (TIGRFAM); mobidb-lite (MOBIDB_LITE); PTHR11063:SF16 (PANTHER); PTHR11063 (PANTHER); IPR005715 (HAMAP); IPR000965 (HAMAP); IPR000965 (CDD); cd04256 (CDD); IPR036393 (…	C:GO:0005737; F:GO:0016491; F:GO:0003824; P:GO:0008152; F:GO:0004350; P:GO:0006561; P:GO:0055114	C:cytoplasm; F:oxidoreductase activity; F:catalytic activity; P:metabolic process; F:glutamate-5-semialdehyde dehydrogenase activity; P:proline biosynthetic process; P:oxidation-reduction process
GMOY012015-PA	SGP2_GLOMM ame: Full=Proline-rich sgp2 Flags: Precursor	132	2	1.78787e-75	75.5	1	C:GO:0005576	C:extracellular region			mobidb-lite (MOBIDB_LITE); mobidb-lite (MOBIDB_LITE)	no GO terms	no GO terms
GMOY005539-PA	adenylosuccinate synthetase	465	20	0	88	6	F:GO:0000287; F:GO:0005525; P:GO:0044208; F:GO:0004019; C:GO:0005737; P:GO:0022008	F:magnesium ion binding; F:GTP binding; P:'de novo' AMP biosynthetic process; F:adenylosuccinate synthase activity; C:cytoplasm; P:neurogenesis	EC:6.3.4.4	Adenylosuccinate synthase	IPR001114 (SMART); IPR001114 (TIGRFAM); G3DSA:3.90.170.10 (GENE3D); IPR001114 (PFAM); G3DSA:3.40.440.10 (GENE3D); PTHR11846:SF2 (PANTHER); IPR001114 (PANTHER); IPR001114 (HAMAP); IPR001114 (CDD); IPR027417 (SUPERFAMILY)	F:GO:0005525; F:GO:0004019; P:GO:0006164	F:GTP binding; F:adenylosuccinate synthase activity; P:purine nucleotide biosynthetic process
GMOY012116-PA	L-dopachrome tautomerase yellow-f2-like	444	20	0	74.5						IPR011042 (G3DSA:2.120.10.GENE3D); IPR017996 (PFAM); PTHR10009:SF10 (PANTHER); IPR017996 (PANTHER); SSF63829 (SUPERFAMILY)	no GO terms	no GO terms
GMOY004864-PA	thioredoxin reductase mitochondrial isoform X2	504	20	0	89.25	6	C:GO:0005623; F:GO:0050660; F:GO:0004791; P:GO:0098869; P:GO:0045454; P:GO:0055114	C:cell; F:flavin adenine dinucleotide binding; F:thioredoxin-disulfide reductase activity; P:cellular oxidant detoxification; P:cell redox homeostasis; P:oxidation-reduction process	EC:1.8.1.9	Thioredoxin-disulfide reductase	PR00368 (PRINTS); PR00411 (PRINTS); IPR006338 (TIGRFAM); IPR001100 (PIRSF); IPR004099 (PFAM); IPR016156 (G3DSA:3.30.390.GENE3D); IPR023753 (PFAM); IPR036188 (G3DSA:3.50.50.GENE3D); IPR036188 (G3DSA:3.50.50.GENE3D); G3DSA:1.10.287.990 (GENE3D); IPR036188 (G3DSA:3.50.50.GENE3D); PTHR43256 (PANTHER); PTHR43256:SF3 (PANTHER); IPR036188 (SUPERFAMILY); IPR016156 (SUPERFAMILY); IPR036188 (SUPERFAMILY)	F:GO:0016491; F:GO:0050660; F:GO:0009055; F:GO:0004791; P:GO:0055114; P:GO:0045454	F:oxidoreductase activity; F:flavin adenine dinucleotide binding; F:electron carrier activity; F:thioredoxin-disulfide reductase activity; P:oxidation-reduction process; P:cell redox homeostasis
GMOY003765-PA	moesin ezrin radixin homolog 1 isoform X1	596	20	0	94.1	26	C:GO:0035003; C:GO:0032154; P:GO:0045807; P:GO:0008284; C:GO:0045169; C:GO:1990023; P:GO:0030866; F:GO:0005546; P:GO:0045197; P:GO:0016057; P:GO:0016336; P:GO:0045313; P:GO:0045433; C:GO:0005884; P:GO:0042048; P:GO:0007368; C:GO:0005634; C:GO:0005912; P:GO:0007318; P:GO:0032956; F:GO:0003779; P:GO:0072499; C:GO:0005938; C:GO:0019898; C:GO:0016324; P:GO:0035149	C:subapical complex; C:cleavage furrow; P:positive regulation of endocytosis; P:positive regulation of cell proliferation; C:fusome; C:mitotic spindle midzone; P:cortical actin cytoskeleton organization; F:phosphatidylinositol-4,5-bisphosphate binding; P:establishment or maintenance of epithelial cell apical/basal polarity; P:regulation of membrane potential in photoreceptor cell; P:establishment…			IPR019749 (PRINTS); IPR000798 (PRINTS); IPR018980 (SMART); IPR019749 (SMART); G3DSA:3.10.20.90 (GENE3D); IPR014352 (G3DSA:1.20.80.GENE3D); IPR011174 (PIRSF); IPR018979 (PFAM); IPR011259 (PFAM); G3DSA:1.20.5.450 (GENE3D); IPR019748 (PFAM); IPR018980 (PFAM); IPR011993 (G3DSA:2.30.29.GENE3D); mobidb-lite (MOBIDB_LITE); mobidb-lite (MOBIDB_LITE); PTHR23281:SF18 (PANTHER); PTHR23281 (PANTHER); IPR0002…	C:GO:0005856; F:GO:0003779; F:GO:0008092	C:cytoskeleton; F:actin binding; F:cytoskeletal protein binding
GMOY005519-PA	chitinase Idgf4	443	20	0	90.4	5	F:GO:0004568; P:GO:0005975; P:GO:0006032; P:GO:0007275; C:GO:0005576	F:chitinase activity; P:carbohydrate metabolic process; P:chitin catabolic process; P:multicellular organism development; C:extracellular region	EC:3.2.1.14	Chitinase	IPR011583 (SMART); G3DSA:3.20.20.80 (GENE3D); IPR001223 (PFAM); PTHR11177 (PANTHER); IPR015520 (PTHR11177:PANTHER); IPR015520 (CDD); IPR017853 (SUPERFAMILY); IPR029070 (SUPERFAMILY)	P:GO:0005975; F:GO:0008061	P:carbohydrate metabolic process; F:chitin binding
GMOY003684-PA	enolase	476	20	0	91.8	4	F:GO:0000287; F:GO:0004634; P:GO:0006096; C:GO:0000015	F:magnesium ion binding; F:phosphopyruvate hydratase activity; P:glycolytic process; C:phosphopyruvate hydratase complex	EC:4.2.1.11	Phosphopyruvate hydratase	IPR000941 (PRINTS); IPR020810 (SMART); IPR020811 (SMART); IPR000941 (PIRSF); IPR036849 (G3DSA:3.20.20.GENE3D); IPR020811 (PFAM); IPR020810 (PFAM); IPR029017 (G3DSA:3.30.390.GENE3D); IPR000941 (TIGRFAM); IPR000941 (PTHR11902:PANTHER); IPR000941 (PANTHER); IPR000941 (HAMAP); IPR000941 (CDD); IPR036849 (SUPERFAMILY); IPR029017 (SUPERFAMILY)	F:GO:0000287; F:GO:0004634; F:GO:0046872; P:GO:0006096; C:GO:0000015	F:magnesium ion binding; F:phosphopyruvate hydratase activity; F:metal ion binding; P:glycolytic process; C:phosphopyruvate hydratase complex
GMOY001946-PA	aminopeptidase isoform X2	496	20	0	86.4	5	C:GO:0005737; P:GO:0006508; F:GO:0008235; F:GO:0004177; F:GO:0030145	C:cytoplasm; P:proteolysis; F:metalloexopeptidase activity; F:aminopeptidase activity; F:manganese ion binding	EC:3.4.11	Acting on peptide bonds (peptidases)	IPR011356 (PRINTS); G3DSA:3.40.630.10 (GENE3D); IPR000819 (PFAM); PTHR11963:SF23 (PANTHER); IPR011356 (PANTHER); SSF53187 (SUPERFAMILY)	P:GO:0019538; C:GO:0005737; P:GO:0006508; F:GO:0008235; F:GO:0004177; F:GO:0030145; C:GO:0005622	P:protein metabolic process; C:cytoplasm; P:proteolysis; F:metalloexopeptidase activity; F:aminopeptidase activity; F:manganese ion binding; C:intracellular
GMOY006859-PA	aminopeptidase isoform X2	90	20	5.16101e-37	88.1	5	C:GO:0005737; P:GO:0006508; F:GO:0008235; F:GO:0004177; F:GO:0030145	C:cytoplasm; P:proteolysis; F:metalloexopeptidase activity; F:aminopeptidase activity; F:manganese ion binding	EC:3.4.11	Acting on peptide bonds (peptidases)	G3DSA:3.40.630.10 (GENE3D)	no GO terms	no GO terms
GMOY008040-PA	peroxiredoxin 1	194	20	1.57691e-144	91.25	4	F:GO:0004601; P:GO:0098869; P:GO:0055114; F:GO:0051920	F:peroxidase activity; P:cellular oxidant detoxification; P:oxidation-reduction process; F:peroxiredoxin activity	EC:1.11.1.15; EC:1.11.1.7	Peroxiredoxin; Peroxidase	IPR000866 (PFAM); G3DSA:3.40.30.10 (GENE3D); G3DSA:3.30.1020.10 (GENE3D); IPR019479 (PFAM); IPR024706 (PIRSF); mobidb-lite (MOBIDB_LITE); PTHR10681 (PANTHER); PTHR10681:SF127 (PANTHER); IPR013766 (PROSITE_PROFILES); cd03015 (CDD); IPR036249 (SUPERFAMILY)	F:GO:0016209; F:GO:0016491; P:GO:0055114; P:GO:0045454; F:GO:0051920	F:antioxidant activity; F:oxidoreductase activity; P:oxidation-reduction process; P:cell redox homeostasis; F:peroxiredoxin activity
GMOY004375-PA	heat shock 83	716	20	0	96.75	6	F:GO:0016887; F:GO:0005524; C:GO:0005737; F:GO:0051082; P:GO:0006457; P:GO:0006950	F:ATPase activity; F:ATP binding; C:cytoplasm; F:unfolded protein binding; P:protein folding; P:response to stress	EC:3.6.1.3; EC:3.6.1.15	Adenosinetriphosphatase; Nucleoside-triphosphate phosphatase	IPR020575 (PRINTS); IPR003594 (SMART); IPR003594 (PFAM); IPR036890 (G3DSA:3.30.565.GENE3D); IPR001404 (PFAM); IPR001404 (PIRSF); mobidb-lite (MOBIDB_LITE); mobidb-lite (MOBIDB_LITE); IPR001404 (PANTHER); PTHR11528:SF72 (PANTHER); IPR003594 (CDD); IPR020568 (SUPERFAMILY); IPR037196 (SUPERFAMILY); IPR036890 (SUPERFAMILY)	F:GO:0005524; F:GO:0051082; P:GO:0006457; P:GO:0006950	F:ATP binding; F:unfolded protein binding; P:protein folding; P:response to stress
GMOY003774-PA	PREDICTED: uncharacterized protein LOC101896090	102	20	6.02028e-25	63.55						IPR029277 (SMART); IPR029277 (PFAM); PTHR39957 (PANTHER)	no GO terms	no GO terms
GMOY002786-PA	malate cytoplasmic	311	20	0	87.9	7	C:GO:0005811; C:GO:0005777; P:GO:0005975; F:GO:0030060; P:GO:0006108; P:GO:0046331; P:GO:0006099	C:lipid particle; C:peroxisome; P:carbohydrate metabolic process; F:L-malate dehydrogenase activity; P:malate metabolic process; P:lateral inhibition; P:tricarboxylic acid cycle	EC:1.1.1.37	Malate dehydrogenase	IPR022383 (PFAM); IPR010945 (TIGRFAM); IPR011274 (TIGRFAM); IPR001557 (PIRSF); IPR015955 (G3DSA:3.90.110.GENE3D); IPR001236 (PFAM); G3DSA:3.40.50.720 (GENE3D); IPR010945 (PANTHER); PTHR23382:SF3 (PANTHER); IPR011274 (CDD); IPR015955 (SUPERFAMILY); IPR036291 (SUPERFAMILY)	P:GO:0005975; F:GO:0030060; P:GO:0006108; F:GO:0016615; F:GO:0016616; F:GO:0003824; F:GO:0016491; P:GO:0055114; P:GO:0019752	P:carbohydrate metabolic process; F:L-malate dehydrogenase activity; P:malate metabolic process; F:malate dehydrogenase activity; F:oxidoreductase activity, acting on the CH-OH group of donors, NAD or NADP as acceptor; F:catalytic activity; F:oxidoreductase activity; P:oxidation-reduction process; P:carboxylic acid metabolic process
GMOY006948-PA	spermine oxidase	779	20	0	74.75	2	F:GO:0016491; P:GO:0055114	F:oxidoreductase activity; P:oxidation-reduction process			IPR005636 (SMART); IPR002937 (PFAM); IPR036188 (G3DSA:3.50.50.GENE3D); G3DSA:3.90.660.10 (GENE3D); G3DSA:3.90.660.10 (GENE3D); G3DSA:3.40.50.720 (GENE3D); IPR005636 (PFAM); IPR036188 (G3DSA:3.50.50.GENE3D); PTHR10742:SF348 (PANTHER); PTHR10742 (PANTHER); IPR036188 (SUPERFAMILY); SSF54373 (SUPERFAMILY); IPR036188 (SUPERFAMILY)	F:GO:0016491; P:GO:0055114	F:oxidoreductase activity; P:oxidation-reduction process
GMOY000143-PA	spermine oxidase	1312	20	0	72.45	1	P:GO:0044699	P:single-organism process			IPR005636 (SMART); IPR036188 (G3DSA:3.50.50.GENE3D); IPR002937 (PFAM); G3DSA:3.90.660.10 (GENE3D); G3DSA:3.40.50.720 (GENE3D); IPR036188 (G3DSA:3.50.50.GENE3D); IPR005636 (PFAM); IPR036188 (G3DSA:3.50.50.GENE3D); PTHR10742 (PANTHER); PTHR10742:SF348 (PANTHER); PTHR10742 (PANTHER); PTHR10742:SF348 (PANTHER); IPR036188 (SUPERFAMILY); SSF54373 (SUPERFAMILY); IPR036188 (SUPERFAMILY); SSF54373 (SUPERF…	F:GO:0016491; P:GO:0055114	F:oxidoreductase activity; P:oxidation-reduction process
GMOY000656-PA	spermine oxidase	488	20	0	74.6	2	F:GO:0016491; P:GO:0055114	F:oxidoreductase activity; P:oxidation-reduction process			IPR002937 (PFAM); G3DSA:3.90.660.10 (GENE3D); IPR036188 (G3DSA:3.50.50.GENE3D); G3DSA:3.40.50.720 (GENE3D); PTHR10742 (PANTHER); PTHR10742:SF348 (PANTHER); SSF54373 (SUPERFAMILY); IPR036188 (SUPERFAMILY)	F:GO:0016491; P:GO:0055114	F:oxidoreductase activity; P:oxidation-reduction process
GMOY006832-PA	transcription factor glial cells missing 2	673	20	1.90035e-150	64	7	P:GO:0008283; P:GO:0035165; F:GO:0003700; P:GO:0042690; P:GO:0035164; P:GO:0021782; P:GO:0048813	P:cell proliferation; P:embryonic crystal cell differentiation; F:transcription factor activity, sequence-specific DNA binding; P:negative regulation of crystal cell differentiation; P:embryonic plasmatocyte differentiation; P:glial cell development; P:dendrite morphogenesis			PR00421 (PRINTS); IPR005746 (TIGRFAM); G3DSA:3.40.30.10 (GENE3D); IPR003902 (PFAM); IPR013766 (PFAM); PTHR12414:SF3 (PANTHER); PTHR12414 (PANTHER); IPR003902 (PRODOM); IPR003902 (PROSITE_PROFILES); IPR013766 (PROSITE_PROFILES); cd02947 (CDD); IPR036249 (SUPERFAMILY); IPR036115 (SUPERFAMILY)	F:GO:0003677; F:GO:0015035; P:GO:0006662; P:GO:0006355; P:GO:0045454	F:DNA binding; F:protein disulfide oxidoreductase activity; P:glycerol ether metabolic process; P:regulation of transcription, DNA-templated; P:cell redox homeostasis
GMOY008993-PA	V-type proton ATPase catalytic subunit A	614	20	0	98	10	C:GO:0000221; F:GO:0005524; C:GO:0033181; P:GO:0015991; P:GO:0048388; P:GO:0046034; P:GO:0016197; F:GO:0046961; P:GO:0035149; P:GO:0007446	C:vacuolar proton-transporting V-type ATPase, V1 domain; F:ATP binding; C:plasma membrane proton-transporting V-type ATPase complex; P:ATP hydrolysis coupled proton transport; P:endosomal lumen acidification; P:ATP metabolic process; P:endosomal transport; F:proton-transporting ATPase activity, rotational mechanism; P:lumen formation, open tracheal system; P:imaginal disc growth	EC:3.6.1.3; EC:3.6.1.15	Adenosinetriphosphatase; Nucleoside-triphosphate phosphatase	IPR000194 (PFAM); IPR005725 (TIGRFAM); IPR024034 (G3DSA:1.10.1140.GENE3D); IPR004100 (PFAM); G3DSA:3.40.50.300 (GENE3D); IPR031686 (PFAM); PTHR43607:SF4 (PANTHER); IPR022878 (PANTHER); IPR022878 (HAMAP); cd01134 (CDD); SSF47917 (SUPERFAMILY); IPR036121 (SUPERFAMILY); IPR027417 (SUPERFAMILY)	F:GO:0005524; P:GO:0015992; P:GO:0015991; P:GO:0046034; F:GO:0046961; C:GO:0033180	F:ATP binding; P:proton transport; P:ATP hydrolysis coupled proton transport; P:ATP metabolic process; F:proton-transporting ATPase activity, rotational mechanism; C:proton-transporting V-type ATPase, V1 domain
GMOY000743-PA	V-type proton ATPase catalytic subunit A	613	20	0	96.55	5	F:GO:0005524; P:GO:0015991; P:GO:0046034; F:GO:0046961; C:GO:0033180	F:ATP binding; P:ATP hydrolysis coupled proton transport; P:ATP metabolic process; F:proton-transporting ATPase activity, rotational mechanism; C:proton-transporting V-type ATPase, V1 domain	EC:3.6.1.3; EC:3.6.1.15	Adenosinetriphosphatase; Nucleoside-triphosphate phosphatase	IPR005725 (TIGRFAM); IPR000194 (PFAM); IPR004100 (PFAM); IPR024034 (G3DSA:1.10.1140.GENE3D); G3DSA:3.40.50.300 (GENE3D); IPR031686 (PFAM); IPR022878 (PANTHER); PTHR43607:SF4 (PANTHER); IPR022878 (HAMAP); cd01134 (CDD); IPR027417 (SUPERFAMILY); SSF47917 (SUPERFAMILY); IPR036121 (SUPERFAMILY)	F:GO:0005524; P:GO:0015992; P:GO:0015991; P:GO:0046034; F:GO:0046961; C:GO:0033180	F:ATP binding; P:proton transport; P:ATP hydrolysis coupled proton transport; P:ATP metabolic process; F:proton-transporting ATPase activity, rotational mechanism; C:proton-transporting V-type ATPase, V1 domain
GMOY008764-PA	ATP synthase subunit mitochondrial	552	20	0	97.3	6	C:GO:0045261; F:GO:0005524; P:GO:0015991; F:GO:0046961; P:GO:0015986; F:GO:0046933	C:proton-transporting ATP synthase complex, catalytic core F(1); F:ATP binding; P:ATP hydrolysis coupled proton transport; F:proton-transporting ATPase activity, rotational mechanism; P:ATP synthesis coupled proton transport; F:proton-transporting ATP synthase activity, rotational mechanism	EC:3.6.1.3; EC:3.6.1.15	Adenosinetriphosphatase; Nucleoside-triphosphate phosphatase	IPR023366 (G3DSA:2.40.30.GENE3D); IPR005294 (TIGRFAM); G3DSA:1.20.150.20 (GENE3D); IPR004100 (PFAM); IPR000194 (PFAM); IPR000793 (PFAM); G3DSA:3.40.50.300 (GENE3D); IPR005294 (PIRSF); PTHR43089 (PANTHER); PTHR43089:SF5 (PANTHER); IPR005294 (HAMAP); IPR033732 (CDD); IPR036121 (SUPERFAMILY); IPR027417 (SUPERFAMILY); SSF47917 (SUPERFAMILY)	C:GO:0045261; F:GO:0005524; F:GO:0032559; P:GO:0015992; P:GO:0046034; P:GO:0015986; F:GO:0046933	C:proton-transporting ATP synthase complex, catalytic core F(1); F:ATP binding; F:adenyl ribonucleotide binding; P:proton transport; P:ATP metabolic process; P:ATP synthesis coupled proton transport; F:proton-transporting ATP synthase activity, rotational mechanism
GMOY003306-PA	TSEP_GLOMM ame: Full= ame: Full=EP-repeat Flags: Precursor	314	13	6.25371e-144	53.08	1	C:GO:0005576	C:extracellular region			IPR007931 (PFAM); mobidb-lite (MOBIDB_LITE); PTHR22979:SF45 (PANTHER); PTHR22979 (PANTHER); PS51257 (PROSITE_PROFILES)	no GO terms	no GO terms
GMOY013074-PA	triose phosphate isomerase	247	20	3.10639e-157	88.2	6	P:GO:0006094; F:GO:0046872; P:GO:0006098; P:GO:0006096; C:GO:0016021; F:GO:0004807	P:gluconeogenesis; F:metal ion binding; P:pentose-phosphate shunt; P:glycolytic process; C:integral component of membrane; F:triose-phosphate isomerase activity	EC:5.3.1.1	Triose-phosphate isomerase	IPR000652 (PFAM); IPR000652 (TIGRFAM); IPR013785 (G3DSA:3.20.20.GENE3D); IPR000652 (PANTHER); PTHR21139:SF15 (PANTHER); IPR022896 (HAMAP); IPR000652 (PROSITE_PROFILES); IPR000652 (CDD); IPR035990 (SUPERFAMILY)	F:GO:0003824; P:GO:0008152; P:GO:0006096; F:GO:0004807	F:catalytic activity; P:metabolic process; P:glycolytic process; F:triose-phosphate isomerase activity
GMOY002792-PA	3-ketoacyl- mitochondrial	453	20	0	92.75	5	C:GO:0005811; P:GO:0006635; F:GO:0003988; C:GO:0005739; C:GO:0005875	C:lipid particle; P:fatty acid beta-oxidation; F:acetyl-CoA C-acyltransferase activity; C:mitochondrion; C:microtubule associated complex	EC:2.3.1.16	Acetyl-CoA C-acyltransferase	IPR016039 (G3DSA:3.40.47.GENE3D); IPR020617 (PFAM); IPR002155 (PIRSF); IPR002155 (TIGRFAM); IPR016039 (G3DSA:3.40.47.GENE3D); IPR020616 (PFAM); PTHR18919:SF107 (PANTHER); PTHR18919 (PANTHER); IPR002155 (CDD); IPR016039 (SUPERFAMILY); IPR016039 (SUPERFAMILY)	F:GO:0016747; F:GO:0003824; P:GO:0008152	F:transferase activity, transferring acyl groups other than amino-acyl groups; F:catalytic activity; P:metabolic process
GMOY010278-PA	peptidyl-prolyl cis-trans isomerase-like isoform X2	332	20	8.63704e-112	77.05	3	F:GO:0003755; P:GO:0000413; P:GO:0006457	F:peptidyl-prolyl cis-trans isomerase activity; P:protein peptidyl-prolyl isomerization; P:protein folding	EC:5.2.1.8	Peptidylprolyl isomerase	IPR002130 (PRINTS); IPR023416 (SMART); IPR002130 (PFAM); IPR014306 (TIGRFAM); IPR023416 (PFAM); IPR029000 (G3DSA:2.40.100.GENE3D); IPR036817 (G3DSA:2.60.40.GENE3D); IPR024936 (PANTHER); PTHR11071:SF377 (PANTHER); IPR002130 (PROSITE_PROFILES); cd05822 (CDD); cd01926 (CDD); IPR036817 (SUPERFAMILY); IPR029000 (SUPERFAMILY)	F:GO:0003755; F:GO:0033971; P:GO:0000413; P:GO:0006144	F:peptidyl-prolyl cis-trans isomerase activity; F:hydroxyisourate hydrolase activity; P:protein peptidyl-prolyl isomerization; P:purine nucleobase metabolic process
GMOY009907-PA	cytochrome c-2	108	20	2.31533e-75	98.85	11	P:GO:0043280; C:GO:0005758; C:GO:0005759; F:GO:0046872; F:GO:0009055; P:GO:0006123; C:GO:0005829; P:GO:0006122; C:GO:0005743; C:GO:0070469; F:GO:0020037	P:positive regulation of cysteine-type endopeptidase activity involved in apoptotic process; C:mitochondrial intermembrane space; C:mitochondrial matrix; F:metal ion binding; F:electron carrier activity; P:mitochondrial electron transport, cytochrome c to oxygen; C:cytosol; P:mitochondrial electron transport, ubiquinol to cytochrome c; C:mitochondrial inner membrane; C:respiratory chain; F:heme b…			IPR002327 (PRINTS); IPR036909 (G3DSA:1.10.760.GENE3D); IPR009056 (PFAM); IPR002327 (PANTHER); PTHR11961:SF15 (PANTHER); IPR009056 (PROSITE_PROFILES); IPR036909 (SUPERFAMILY)	F:GO:0009055; F:GO:0020037	F:electron carrier activity; F:heme binding
GMOY007346-PA	electron transfer flavo subunit beta	253	20	1.42206e-158	95.35	6	C:GO:0005811; P:GO:0006119; P:GO:0007406; F:GO:0009055; C:GO:0017133; C:GO:0005875	C:lipid particle; P:oxidative phosphorylation; P:negative regulation of neuroblast proliferation; F:electron carrier activity; C:mitochondrial electron transfer flavoprotein complex; C:microtubule associated complex			IPR014730 (SMART); IPR012255 (PIRSF); IPR014730 (PFAM); IPR014729 (G3DSA:3.40.50.GENE3D); PTHR21294:SF8 (PANTHER); IPR012255 (PANTHER); IPR033948 (CDD); SSF52402 (SUPERFAMILY)	F:GO:0009055	F:electron carrier activity
GMOY005793-PA	fumarate mitochondrial isoform X1	467	20	0	95.95	4	P:GO:0006099; F:GO:0004333; P:GO:0006106; C:GO:0045239	P:tricarboxylic acid cycle; F:fumarate hydratase activity; P:fumarate metabolic process; C:tricarboxylic acid cycle enzyme complex	EC:4.2.1.2	Fumarate hydratase	IPR000362 (PRINTS); G3DSA:1.10.40.30 (GENE3D); G3DSA:1.20.200.10 (GENE3D); IPR018951 (PFAM); IPR022761 (PFAM); IPR024083 (G3DSA:1.10.275.GENE3D); IPR005677 (TIGRFAM); IPR005677 (PANTHER); PTHR11444:SF1 (PANTHER); IPR005677 (HAMAP); IPR005677 (CDD); IPR008948 (SUPERFAMILY)	F:GO:0003824; F:GO:0016829; P:GO:0006099; F:GO:0004333; P:GO:0006106; C:GO:0045239	F:catalytic activity; F:lyase activity; P:tricarboxylic acid cycle; F:fumarate hydratase activity; P:fumarate metabolic process; C:tricarboxylic acid cycle enzyme complex
GMOY011652-PA	malate mitochondrial	336	20	0	91.25	10	C:GO:0005811; P:GO:0005975; F:GO:0030060; P:GO:0006108; C:GO:0005759; P:GO:0035096; P:GO:0006099; P:GO:0035071; P:GO:0006919; P:GO:0035209	C:lipid particle; P:carbohydrate metabolic process; F:L-malate dehydrogenase activity; P:malate metabolic process; C:mitochondrial matrix; P:larval midgut cell programmed cell death; P:tricarboxylic acid cycle; P:salivary gland cell autophagic cell death; P:activation of cysteine-type endopeptidase activity involved in apoptotic process; P:pupal development	EC:1.1.1.37	Malate dehydrogenase	IPR001236 (PFAM); IPR022383 (PFAM); IPR015955 (G3DSA:3.90.110.GENE3D); IPR010097 (TIGRFAM); G3DSA:3.40.50.720 (GENE3D); IPR001557 (PIRSF); PTHR11540 (PANTHER); cd01337 (CDD); IPR015955 (SUPERFAMILY); IPR036291 (SUPERFAMILY)	P:GO:0005975; F:GO:0030060; F:GO:0016616; F:GO:0016491; F:GO:0003824; P:GO:0055114; P:GO:0006099; P:GO:0019752	P:carbohydrate metabolic process; F:L-malate dehydrogenase activity; F:oxidoreductase activity, acting on the CH-OH group of donors, NAD or NADP as acceptor; F:oxidoreductase activity; F:catalytic activity; P:oxidation-reduction process; P:tricarboxylic acid cycle; P:carboxylic acid metabolic process
GMOY002825-PA	General odorant-binding 99b	153	20	2.47704e-102	75.15	1	F:GO:0005549	F:odorant binding			IPR006170 (SMART); IPR036728 (G3DSA:1.10.238.GENE3D); IPR006170 (PFAM); PTHR11857 (PANTHER); PTHR11857:SF2 (PANTHER); IPR036728 (SUPERFAMILY)	F:GO:0005549	F:odorant binding
GMOY011989-PA	probable medium-chain specific acyl- mitochondrial	420	20	0	93.5	3	F:GO:0003995; F:GO:0050660; P:GO:0055114	F:acyl-CoA dehydrogenase activity; F:flavin adenine dinucleotide binding; P:oxidation-reduction process	EC:1.3.99.3	Acting on the CH-CH group of donors	IPR006091 (PFAM); IPR037069 (G3DSA:1.10.540.GENE3D); IPR009075 (PFAM); PIRSF016578 (PIRSF); G3DSA:1.20.140.10 (GENE3D); G3DSA:2.40.110.10 (GENE3D); IPR013786 (PFAM); PTHR43516 (PANTHER); PTHR43516:SF5 (PANTHER); IPR034180 (CDD); IPR009100 (SUPERFAMILY); IPR036250 (SUPERFAMILY)	P:GO:0006635; F:GO:0016627; F:GO:0070991; F:GO:0050660; C:GO:0005739; P:GO:0008152; P:GO:0055114	P:fatty acid beta-oxidation; F:oxidoreductase activity, acting on the CH-CH group of donors; F:medium-chain-acyl-CoA dehydrogenase activity; F:flavin adenine dinucleotide binding; C:mitochondrion; P:metabolic process; P:oxidation-reduction process
GMOY013081-PA	succinate-- ligase [ADP-forming] subunit mitochondrial isoform X1	452	20	0	89.7	3	F:GO:0005524; P:GO:0008152; F:GO:0016874	F:ATP binding; P:metabolic process; F:ligase activity			IPR005809 (TIGRFAM); IPR013815 (G3DSA:3.30.1490.GENE3D); IPR005809 (PIRSF); IPR016102 (G3DSA:3.40.50.GENE3D); IPR005811 (PFAM); IPR013650 (PFAM); G3DSA:3.30.470.20 (GENE3D); PTHR11815:SF1 (PANTHER); IPR005809 (PANTHER); IPR034723 (HAMAP); IPR011761 (PROSITE_PROFILES); IPR005809 (HAMAP); IPR016102 (SUPERFAMILY); SSF56059 (SUPERFAMILY)	F:GO:0005524; F:GO:0003824; F:GO:0046872; P:GO:0008152; C:GO:0005739; P:GO:0006099	F:ATP binding; F:catalytic activity; F:metal ion binding; P:metabolic process; C:mitochondrion; P:tricarboxylic acid cycle
GMOY007078-PA	PREDICTED: uncharacterized protein LOC109579852	184	20	6.08573e-42	80.8	1	C:GO:0016021	C:integral component of membrane			IPR029277 (SMART); IPR029277 (PFAM); PTHR39957 (PANTHER)	no GO terms	no GO terms
GMOY002110-PA	aldose reductase isoform X2	279	20	2.60458e-164	80.05	2	F:GO:0016491; P:GO:0055114	F:oxidoreductase activity; P:oxidation-reduction process			IPR020471 (PRINTS); IPR036812 (G3DSA:3.20.20.GENE3D); IPR023210 (PFAM); IPR036812 (G3DSA:3.20.20.GENE3D); IPR020471 (PIRSF); IPR020471 (PANTHER); PTHR11732:SF294 (PANTHER); IPR023210 (CDD); IPR036812 (SUPERFAMILY)	F:GO:0016491; P:GO:0055114	F:oxidoreductase activity; P:oxidation-reduction process
GMOY000211-PA	transport Sec24C	1121	20	0	89.35	4	F:GO:0008270; P:GO:0006888; P:GO:0006886; C:GO:0030127	F:zinc ion binding; P:ER to Golgi vesicle-mediated transport; P:intracellular protein transport; C:COPII vesicle coat			IPR006896 (PFAM); IPR029006 (G3DSA:3.40.20.GENE3D); G3DSA:2.30.30.380 (GENE3D); IPR007123 (PFAM); IPR006900 (PFAM); IPR036465 (G3DSA:3.40.50.GENE3D); G3DSA:2.60.40.1670 (GENE3D); IPR006895 (PFAM); IPR012990 (PFAM); mobidb-lite (MOBIDB_LITE); PTHR13803:SF5 (PANTHER); PTHR13803 (PANTHER); cd01479 (CDD); SSF81995 (SUPERFAMILY); IPR036174 (SUPERFAMILY); IPR036180 (SUPERFAMILY); IPR036175 (SUPERFAMILY…	P:GO:0006888; F:GO:0008270; P:GO:0006886; C:GO:0030127	P:ER to Golgi vesicle-mediated transport; F:zinc ion binding; P:intracellular protein transport; C:COPII vesicle coat
GMOY009539-PA	Gmfb8	220	1	9.77534e-19	46						no IPS match	no IPS match	no IPS match
GMOY002461-PA	adenylosuccinate lyase	483	20	0	90.4	4	F:GO:0004018; P:GO:0044208; P:GO:0006189; F:GO:0070626	F:N6-(1,2-dicarboxyethyl)AMP AMP-lyase (fumarate-forming) activity; P:'de novo' AMP biosynthetic process; P:'de novo' IMP biosynthetic process; F:(S)-2-(5-amino-1-(5-phospho-D-ribosyl)imidazole-4-carboxamido)succinate AMP-lyase (fumarate-forming) activity	EC:4.3.2.2	Adenylosuccinate lyase	PR00145 (PRINTS); IPR000362 (PRINTS); IPR019468 (SMART); IPR022761 (PFAM); G3DSA:1.20.200.10 (GENE3D); IPR024083 (G3DSA:1.10.275.GENE3D); IPR019468 (PFAM); IPR004769 (TIGRFAM); PTHR43172 (PANTHER); cd03302 (CDD); IPR008948 (SUPERFAMILY)	P:GO:0009152; F:GO:0004018; F:GO:0003824	P:purine ribonucleotide biosynthetic process; F:N6-(1,2-dicarboxyethyl)AMP AMP-lyase (fumarate-forming) activity; F:catalytic activity
GMOY007044-PA	NADP-dependent malic enzyme isoform X2	828	20	0	77.8	5	P:GO:0006108; F:GO:0046872; F:GO:0051287; F:GO:0004471; P:GO:0055114	P:malate metabolic process; F:metal ion binding; F:NAD binding; F:malate dehydrogenase (decarboxylating) (NAD+) activity; P:oxidation-reduction process	EC:1.1.1.38; EC:1.1.1.39	Malate dehydrogenase (oxaloacetate-decarboxylating); Malate dehydrogenase (decarboxylating)	IPR001891 (PRINTS); IPR012301 (SMART); IPR012302 (SMART); IPR012302 (PFAM); IPR012301 (PFAM); IPR037062 (G3DSA:3.40.50.GENE3D); G3DSA:3.40.50.720 (GENE3D); mobidb-lite (MOBIDB_LITE); PTHR23406:SF13 (PANTHER); PTHR23406 (PANTHER); cd05312 (CDD); SSF53223 (SUPERFAMILY); IPR036291 (SUPERFAMILY)	F:GO:0051287; F:GO:0004470; F:GO:0004471; P:GO:0055114	F:NAD binding; F:malic enzyme activity; F:malate dehydrogenase (decarboxylating) (NAD+) activity; P:oxidation-reduction process
GMOY010934-PA	glycogenin-1 isoform X4	806	20	0	88.9	1	F:GO:0016757	F:transferase activity, transferring glycosyl groups			IPR002495 (PFAM); IPR029044 (G3DSA:3.90.550.GENE3D); mobidb-lite (MOBIDB_LITE); mobidb-lite (MOBIDB_LITE); PTHR11183 (PANTHER); PTHR11183:SF18 (PANTHER); cd02537 (CDD); IPR029044 (SUPERFAMILY)	F:GO:0016757	F:transferase activity, transferring glycosyl groups
GMOY000522-PA	40S ribosomal SA	270	20	3.89342e-157	92.9	8	C:GO:0005634; F:GO:0003735; C:GO:0022627; P:GO:0007275; F:GO:0043022; P:GO:0002181; P:GO:0000028; C:GO:0005875	C:nucleus; F:structural constituent of ribosome; C:cytosolic small ribosomal subunit; P:multicellular organism development; F:ribosome binding; P:cytoplasmic translation; P:ribosomal small subunit assembly; C:microtubule associated complex			IPR001865 (PRINTS); IPR032281 (PFAM); IPR005707 (TIGRFAM); IPR001865 (PFAM); G3DSA:3.40.50.10490 (GENE3D); mobidb-lite (MOBIDB_LITE); IPR005707 (PANTHER); PTHR11489:SF9 (PANTHER); IPR027498 (HAMAP); IPR001865 (CDD); IPR023591 (SUPERFAMILY)	F:GO:0003735; C:GO:0015935; C:GO:0005840; C:GO:0005622; P:GO:0006412	F:structural constituent of ribosome; C:small ribosomal subunit; C:ribosome; C:intracellular; P:translation
GMOY000747-PA	nucleoside diphosphate kinase	199	20	3.41885e-111	92.75	20	P:GO:0034332; P:GO:0006241; P:GO:0006183; P:GO:0035152; P:GO:0046777; P:GO:0006165; P:GO:0007067; F:GO:0004550; C:GO:0005875; C:GO:0005886; C:GO:0005874; F:GO:0008017; P:GO:0007017; F:GO:0000287; F:GO:0005525; F:GO:0005524; P:GO:0006228; P:GO:0007427; P:GO:0018105; P:GO:0016334	P:adherens junction organization; P:CTP biosynthetic process; P:GTP biosynthetic process; P:regulation of tube architecture, open tracheal system; P:protein autophosphorylation; P:nucleoside diphosphate phosphorylation; P:mitotic nuclear division; F:nucleoside diphosphate kinase activity; C:microtubule associated complex; C:plasma membrane; C:microtubule; F:microtubule binding; P:microtubule-base…	EC:2.7.4.6	Nucleoside-diphosphate kinase	IPR001564 (PRINTS); IPR001564 (SMART); IPR036850 (G3DSA:3.30.70.GENE3D); IPR034907 (PFAM); PTHR11349 (PANTHER); PTHR11349:SF69 (PANTHER); cd04413 (CDD); IPR036850 (SUPERFAMILY)	P:GO:0006228; P:GO:0006241; P:GO:0006183; P:GO:0006165; F:GO:0004550	P:UTP biosynthetic process; P:CTP biosynthetic process; P:GTP biosynthetic process; P:nucleoside diphosphate phosphorylation; F:nucleoside diphosphate kinase activity
GMOY007353-PA	glutamate mitochondrial isoform X2	391	20	0	97.25	8	F:GO:0042802; C:GO:0005759; P:GO:0019551; P:GO:0046693; C:GO:0005829; F:GO:0004353; F:GO:0004352; P:GO:0006116	F:identical protein binding; C:mitochondrial matrix; P:glutamate catabolic process to 2-oxoglutarate; P:sperm storage; C:cytosol; F:glutamate dehydrogenase [NAD(P)+] activity; F:glutamate dehydrogenase (NAD+) activity; P:NADH oxidation	EC:1.4.1.3; EC:1.4.1.2	Glutamate dehydrogenase (NAD(P)(+)); Glutamate dehydrogenase	IPR006095 (PRINTS); IPR006096 (SMART); G3DSA:3.40.50.720 (GENE3D); IPR014362 (PIRSF); G3DSA:3.40.50.10860 (GENE3D); IPR006096 (PFAM); IPR006097 (PFAM); PTHR11606 (PANTHER); PTHR11606:SF25 (PANTHER); IPR033922 (CDD); SSF53223 (SUPERFAMILY); IPR036291 (SUPERFAMILY)	F:GO:0016491; F:GO:0016639; P:GO:0006520; P:GO:0055114	F:oxidoreductase activity; F:oxidoreductase activity, acting on the CH-NH2 group of donors, NAD or NADP as acceptor; P:cellular amino acid metabolic process; P:oxidation-reduction process
GMOY004147-PA	antifungal peptide-	182	15	7.91687e-33	53.2						G3DSA:1.20.5.1230 (GENE3D); SSF47857 (SUPERFAMILY)	no GO terms	no GO terms
GMOY009603-PA	aldose reductase	849	20	0	81.35	2	F:GO:0016491; P:GO:0055114	F:oxidoreductase activity; P:oxidation-reduction process			IPR020471 (PRINTS); IPR036812 (G3DSA:3.20.20.GENE3D); IPR036812 (G3DSA:3.20.20.GENE3D); IPR023210 (PFAM); IPR020471 (PANTHER); PTHR11732:SF366 (PANTHER); PTHR11732:SF366 (PANTHER); IPR020471 (PANTHER); IPR023210 (CDD); IPR023210 (CDD); IPR023210 (CDD); IPR036812 (SUPERFAMILY); IPR036812 (SUPERFAMILY); IPR036812 (SUPERFAMILY)	F:GO:0016491; P:GO:0055114	F:oxidoreductase activity; P:oxidation-reduction process
GMOY005958-PA	prolyl endopeptidase	759	20	0	85.1	3	P:GO:0006508; F:GO:0004252; F:GO:0070008	P:proteolysis; F:serine-type endopeptidase activity; F:serine-type exopeptidase activity	EC:3.4.21	Acting on peptide bonds (peptidases)	IPR002470 (PRINTS); G3DSA:2.130.10.120 (GENE3D); IPR023302 (PFAM); IPR001375 (PFAM); IPR029058 (G3DSA:3.40.50.GENE3D); PTHR42881:SF2 (PANTHER); PTHR42881 (PANTHER); SSF50993 (SUPERFAMILY); IPR029058 (SUPERFAMILY)	P:GO:0006508; F:GO:0004252; F:GO:0008236; F:GO:0070008	P:proteolysis; F:serine-type endopeptidase activity; F:serine-type peptidase activity; F:serine-type exopeptidase activity
GMOY004926-PA	fatty acid synthase	2412	20	0	84.35	14	F:GO:0004320; P:GO:0009058; F:GO:0004313; F:GO:0004315; F:GO:0047451; F:GO:0004314; F:GO:0004317; F:GO:0004316; F:GO:0004319; F:GO:0016295; C:GO:0016021; F:GO:0016296; P:GO:0055114; F:GO:0031177	F:oleoyl-[acyl-carrier-protein] hydrolase activity; P:biosynthetic process; F:[acyl-carrier-protein] S-acetyltransferase activity; F:3-oxoacyl-[acyl-carrier-protein] synthase activity; F:3-hydroxyoctanoyl-[acyl-carrier-protein] dehydratase activity; F:[acyl-carrier-protein] S-malonyltransferase activity; F:3-hydroxypalmitoyl-[acyl-carrier-protein] dehydratase activity; F:3-oxoacyl-[acyl-carrier-p…	EC:2.3.1.85; EC:2.3.1.41; EC:4.2.1.61; EC:3.1.2.14; EC:2.3.1.38; EC:4.2.1.59; EC:1.1.1.100; EC:2.3.1.39; EC:1.3.1.10	Fatty-acid synthase; Beta-ketoacyl-[acyl-carrier-protein] synthase I; Carbon-oxygen lyases; Oleoyl-[acyl-carrier-protein] hydrolase; [Acyl-carrier-protein] S-acetyltransferase; 3-hydroxyacyl-[acyl-carrier-protein] dehydratase; 3-oxoacyl-[acyl-carrier-protein] reductase; [Acyl-carrier-protein] S-malonyltransferase; Enoyl-[acyl-carrier-protein] reductase (NADPH, Si-specific)	IPR020841 (SMART); IPR020801 (SMART); IPR020807 (SMART); IPR020806 (SMART); SM00822 (SMART); IPR020843 (SMART); G3DSA:3.40.366.10 (GENE3D); IPR001031 (PFAM); G3DSA:3.90.180.10 (GENE3D); IPR013149 (PFAM); G3DSA:3.10.129.10 (GENE3D); IPR014030 (PFAM); IPR032821 (PFAM); G3DSA:3.40.50.720 (GENE3D); IPR036736 (G3DSA:1.10.1200.GENE3D); IPR013968 (PFAM); G3DSA:3.90.180.10 (GENE3D); G3DSA:3.40.50.720 (GE…	F:GO:0016788; P:GO:0008152; F:GO:0004320; P:GO:0009058; F:GO:0004313; F:GO:0004312; F:GO:0004315; F:GO:0004314; F:GO:0004317; F:GO:0004316; F:GO:0004319; F:GO:0016491; F:GO:0003824; F:GO:0016295; F:GO:0016296; F:GO:0016297; P:GO:0055114; F:GO:0031177	F:hydrolase activity, acting on ester bonds; P:metabolic process; F:oleoyl-[acyl-carrier-protein] hydrolase activity; P:biosynthetic process; F:[acyl-carrier-protein] S-acetyltransferase activity; F:fatty acid synthase activity; F:3-oxoacyl-[acyl-carrier-protein] synthase activity; F:[acyl-carrier-protein] S-malonyltransferase activity; F:3-hydroxypalmitoyl-[acyl-carrier-protein] dehydratase acti…
GMOY009540-PA	---NA---	198									no IPS match	no IPS match	no IPS match
GMOY009357-PA	Succinate dehydrogenase [ubiquinone] flavo mitochondrial	338	20	0	91.65	5	F:GO:0008177; F:GO:0050660; P:GO:0006099; P:GO:0022900; C:GO:0005743	F:succinate dehydrogenase (ubiquinone) activity; F:flavin adenine dinucleotide binding; P:tricarboxylic acid cycle; P:electron transport chain; C:mitochondrial inner membrane	EC:1.3.99.1; EC:1.3.5.1	Deleted entry; Succinate dehydrogenase (quinone)	IPR036188 (G3DSA:3.50.50.GENE3D); IPR015939 (PFAM); IPR037099 (G3DSA:1.20.58.GENE3D); IPR027477 (G3DSA:3.90.700.GENE3D); G3DSA:4.10.80.40 (GENE3D); IPR003953 (PFAM); PTHR11632 (PANTHER); PTHR11632:SF51 (PANTHER); IPR027477 (SUPERFAMILY); IPR036188 (SUPERFAMILY); IPR037099 (SUPERFAMILY)	F:GO:0016491; P:GO:0055114	F:oxidoreductase activity; P:oxidation-reduction process
GMOY000497-PA	heat shock beta-1 isoform X2	177	20	1.13072e-109	91.95	7	C:GO:0030018; P:GO:0010506; P:GO:0006497; C:GO:0005829; P:GO:0010998; P:GO:0042026; C:GO:0005654	C:Z disc; P:regulation of autophagy; P:protein lipidation; C:cytosol; P:regulation of translational initiation by eIF2 alpha phosphorylation; P:protein refolding; C:nucleoplasm			IPR001436 (PRINTS); IPR008978 (G3DSA:2.60.40.GENE3D); IPR002068 (PFAM); PTHR11527:SF31 (PANTHER); IPR031107 (PANTHER); IPR002068 (PROSITE_PROFILES); cd06526 (CDD); IPR008978 (SUPERFAMILY)	no GO terms	no GO terms
GMOY012145-PA	4-hydroxyphenylpyruvate dioxygenase	380	20	0	91.65	4	P:GO:0009072; F:GO:0003868; F:GO:0046872; P:GO:0055114	P:aromatic amino acid family metabolic process; F:4-hydroxyphenylpyruvate dioxygenase activity; F:metal ion binding; P:oxidation-reduction process	EC:1.13.11; EC:1.13.11.27	Acting on single donors with incorporation of molecular oxygen (oxygenases). The oxygen incorporated need not be derived from O(2); 4-hydroxyphenylpyruvate dioxygenase	IPR004360 (PFAM); PF13669 (PFAM); IPR005956 (PIRSF); IPR029068 (G3DSA:3.10.180.GENE3D); IPR005956 (TIGRFAM); IPR029068 (G3DSA:3.10.180.GENE3D); PTHR11959:SF1 (PANTHER); IPR005956 (PANTHER); cd07250 (CDD); cd08342 (CDD); IPR029068 (SUPERFAMILY)	F:GO:0016701; P:GO:0009072; F:GO:0003868; P:GO:0055114	F:oxidoreductase activity, acting on single donors with incorporation of molecular oxygen; P:aromatic amino acid family metabolic process; F:4-hydroxyphenylpyruvate dioxygenase activity; P:oxidation-reduction process
GMOY009852-PA	pyruvate mitochondrial isoform X1	549	20	0	95.3	8	F:GO:0003677; F:GO:0005524; P:GO:0006094; F:GO:0004736; F:GO:0046872; F:GO:0009374; F:GO:0004075; P:GO:0006090	F:DNA binding; F:ATP binding; P:gluconeogenesis; F:pyruvate carboxylase activity; F:metal ion binding; F:biotin binding; F:biotin carboxylase activity; P:pyruvate metabolic process	EC:6.4.1.1; EC:6.3.4.14	Pyruvate carboxylase; Biotin carboxylase	G3DSA:2.40.50.100 (GENE3D); IPR000891 (PFAM); IPR000089 (PFAM); G3DSA:3.10.600.10 (GENE3D); G3DSA:1.10.10.60 (GENE3D); IPR003379 (PFAM); IPR013785 (G3DSA:3.20.20.GENE3D); PTHR18866:SF114 (PANTHER); PTHR18866 (PANTHER); IPR000891 (PROSITE_PROFILES); IPR000089 (PROSITE_PROFILES); cd07937 (CDD); cd06850 (CDD); IPR011053 (SUPERFAMILY); SSF51569 (SUPERFAMILY); SSF89000 (SUPERFAMILY)	F:GO:0003824	F:catalytic activity
GMOY007385-PA	filamin-A isoform X8	159	20	2.90324e-60	100	20	C:GO:0070938; C:GO:0035183; P:GO:0008045; P:GO:0008340; P:GO:0008104; P:GO:0008302; P:GO:0030708; C:GO:0045179; P:GO:0007067; P:GO:0008355; C:GO:0035182; P:GO:0048149; C:GO:0005884; F:GO:0051015; P:GO:0007616; C:GO:0005634; C:GO:0048471; C:GO:0005829; P:GO:0030431; P:GO:0035204	C:contractile ring; C:female germline ring canal inner rim; P:motor neuron axon guidance; P:determination of adult lifespan; P:protein localization; P:female germline ring canal formation, actin assembly; P:germarium-derived female germ-line cyst encapsulation; C:apical cortex; P:mitotic nuclear division; P:olfactory learning; C:female germline ring canal outer rim; P:behavioral response to ethan…			IPR001715 (SMART); IPR001715 (PFAM); IPR036872 (G3DSA:1.10.418.GENE3D); PTHR43998 (PANTHER); PTHR43998:SF2 (PANTHER); IPR001715 (PROSITE_PROFILES); IPR001715 (CDD); IPR036872 (SUPERFAMILY)	F:GO:0005515	F:protein binding
GMOY000825-PA	adenylate kinase isoenzyme 1 isoform X1	576	20	1.89794e-109	76.4	4	F:GO:0005524; P:GO:0016310; F:GO:0019205; P:GO:0009117	F:ATP binding; P:phosphorylation; F:nucleobase-containing compound kinase activity; P:nucleotide metabolic process			IPR000850 (PRINTS); IPR024336 (PFAM); G3DSA:3.40.50.300 (GENE3D); PF13207 (PFAM); IPR000850 (PANTHER); PTHR23359:SF70 (PANTHER); IPR000850 (PANTHER); PTHR23359:SF70 (PANTHER); IPR000850 (HAMAP); IPR000850 (CDD); IPR027417 (SUPERFAMILY)	F:GO:0005524; F:GO:0019205; P:GO:0006139	F:ATP binding; F:nucleobase-containing compound kinase activity; P:nucleobase-containing compound metabolic process
GMOY006406-PA	MD-2-related lipid-recognition -like	151	20	7.00077e-69	77.7						IPR003172 (SMART); G3DSA:2.60.40.770 (GENE3D); IPR003172 (PFAM); PTHR11306 (PANTHER); PTHR11306:SF17 (PANTHER); IPR014756 (SUPERFAMILY)	no GO terms	no GO terms
GMOY010996-PA	Thioester-containing isoform F	3443	20	0	68.9	3	C:GO:0005615; F:GO:0004866; P:GO:0010951	C:extracellular space; F:endopeptidase inhibitor activity; P:negative regulation of endopeptidase activity			IPR009048 (SMART); IPR001599 (SMART); IPR011625 (SMART); IPR011625 (PFAM); IPR009048 (PFAM); IPR036595 (G3DSA:2.60.40.GENE3D); IPR002890 (PFAM); IPR013783 (G3DSA:2.60.40.GENE3D); IPR019565 (PFAM); IPR013783 (G3DSA:2.60.40.GENE3D); IPR013783 (G3DSA:2.60.40.GENE3D); G3DSA:1.50.10.20 (GENE3D); IPR001599 (PFAM); IPR011626 (PFAM); PTHR11412:SF136 (PANTHER); PTHR11412:SF136 (PANTHER); PTHR11412 (PANTHE…	C:GO:0005615; F:GO:0004866; C:GO:0005576	C:extracellular space; F:endopeptidase inhibitor activity; C:extracellular region
GMOY010862-PA	cytosolic non-specific dipeptidase	454	20	0	85.75	4	F:GO:0016805; P:GO:0006508; F:GO:0034701; F:GO:0008237	F:dipeptidase activity; P:proteolysis; F:tripeptidase activity; F:metallopeptidase activity	EC:3.4.13	Acting on peptide bonds (peptidases)	IPR002933 (PFAM); IPR011650 (PFAM); IPR017153 (PIRSF); G3DSA:3.30.70.360 (GENE3D); G3DSA:3.40.630.10 (GENE3D); PTHR43270:SF2 (PANTHER); PTHR43270 (PANTHER); PTHR43270 (PANTHER); PTHR43270:SF2 (PANTHER); IPR017153 (CDD); SSF53187 (SUPERFAMILY)	F:GO:0016805; P:GO:0008152; F:GO:0016787	F:dipeptidase activity; P:metabolic process; F:hydrolase activity
GMOY001219-PA	elongation factor 1	431	20	0	82.7	2	F:GO:0003746; P:GO:0006414	F:translation elongation factor activity; P:translational elongation			IPR001662 (SMART); G3DSA:3.40.30.10 (GENE3D); IPR036433 (G3DSA:3.30.70.GENE3D); G3DSA:1.20.1050.10 (GENE3D); IPR001662 (PFAM); IPR004045 (PFAM); IPR004046 (PFAM); mobidb-lite (MOBIDB_LITE); PTHR43986 (PANTHER); IPR001662 (PROSITE_PROFILES); IPR010987 (PROSITE_PROFILES); IPR004045 (PROSITE_PROFILES); cd03181 (CDD); cd03044 (CDD); IPR036282 (SUPERFAMILY); IPR036433 (SUPERFAMILY); IPR036249 (SUPERFA…	F:GO:0005515; F:GO:0003746; P:GO:0006414	F:protein binding; F:translation elongation factor activity; P:translational elongation
GMOY010573-PA	rab GDP dissociation inhibitor alpha	454	20	0	96.7	11	F:GO:0005093; P:GO:0016192; F:GO:0016491; P:GO:0007264; C:GO:0008021; P:GO:0015031; P:GO:0050790; C:GO:0005829; P:GO:0055114; C:GO:0005875; P:GO:0007269	F:Rab GDP-dissociation inhibitor activity; P:vesicle-mediated transport; F:oxidoreductase activity; P:small GTPase mediated signal transduction; C:synaptic vesicle; P:protein transport; P:regulation of catalytic activity; C:cytosol; P:oxidation-reduction process; C:microtubule associated complex; P:neurotransmitter secretion			IPR000806 (PRINTS); IPR018203 (PRINTS); IPR018203 (PFAM); G3DSA:3.30.519.10 (GENE3D); G3DSA:3.30.519.10 (GENE3D); PTHR11787:SF8 (PANTHER); IPR018203 (PANTHER); IPR036188 (SUPERFAMILY); IPR036188 (SUPERFAMILY)	F:GO:0005093; F:GO:0005092; P:GO:0007264; P:GO:0015031	F:Rab GDP-dissociation inhibitor activity; F:GDP-dissociation inhibitor activity; P:small GTPase mediated signal transduction; P:protein transport
GMOY008484-PA	cAMP-dependent kinase type II regulatory subunit isoform X3	317	20	0	91.55	6	P:GO:0045859; F:GO:0004691; F:GO:0030552; F:GO:0008603; P:GO:0006468; C:GO:0005952	P:regulation of protein kinase activity; F:cAMP-dependent protein kinase activity; F:cAMP binding; F:cAMP-dependent protein kinase regulator activity; P:protein phosphorylation; C:cAMP-dependent protein kinase complex	EC:2.7.11; EC:2.7.11.11	Transferring phosphorus-containing groups; cAMP-dependent protein kinase	PR00103 (PRINTS); IPR000595 (SMART); IPR000595 (PFAM); IPR014710 (G3DSA:2.60.120.GENE3D); IPR014710 (G3DSA:2.60.120.GENE3D); IPR012198 (PIRSF); PTHR44021 (PANTHER); IPR000595 (PROSITE_PROFILES); IPR000595 (PROSITE_PROFILES); IPR000595 (CDD); IPR000595 (CDD); IPR018490 (SUPERFAMILY); IPR018490 (SUPERFAMILY)	P:GO:0001932; F:GO:0008603; C:GO:0005952	P:regulation of protein phosphorylation; F:cAMP-dependent protein kinase regulator activity; C:cAMP-dependent protein kinase complex
GMOY007820-PA	puromycin-sensitive aminopeptidase isoform X1	1050	20	0	88.05	4	F:GO:0008270; P:GO:0006508; F:GO:0004177; F:GO:0008237	F:zinc ion binding; P:proteolysis; F:aminopeptidase activity; F:metallopeptidase activity	EC:3.4.11	Acting on peptide bonds (peptidases)	IPR014782 (PRINTS); IPR014782 (PFAM); G3DSA:1.10.390.10 (GENE3D); G3DSA:2.60.40.1730 (GENE3D); IPR024571 (PFAM); IPR001930 (PANTHER); PTHR11533:SF205 (PANTHER); IPR034016 (CDD); SSF55486 (SUPERFAMILY); SSF63737 (SUPERFAMILY)	F:GO:0008270; P:GO:0006508; F:GO:0008237	F:zinc ion binding; P:proteolysis; F:metallopeptidase activity
GMOY005926-PA	superoxide dismutase	153	20	5.37705e-94	87.8	10	C:GO:0005777; F:GO:0042803; P:GO:1903146; F:GO:0046872; P:GO:0008340; P:GO:0019430; P:GO:0001306; P:GO:0055114; P:GO:2000331; F:GO:0004784	C:peroxisome; F:protein homodimerization activity; P:regulation of mitophagy; F:metal ion binding; P:determination of adult lifespan; P:removal of superoxide radicals; P:age-dependent response to oxidative stress; P:oxidation-reduction process; P:regulation of terminal button organization; F:superoxide dismutase activity	EC:1.15.1.1	Superoxide dismutase	IPR001424 (PRINTS); IPR001424 (PFAM); IPR036423 (G3DSA:2.60.40.GENE3D); PTHR10003:SF60 (PANTHER); IPR024134 (PANTHER); IPR001424 (CDD); IPR036423 (SUPERFAMILY)	P:GO:0006801; F:GO:0046872	P:superoxide metabolic process; F:metal ion binding
GMOY010582-PA	ubiquitin carboxyl-terminal hydrolase	227	20	4.58093e-133	81.55	4	F:GO:0004843; P:GO:0016579; C:GO:0005875; P:GO:0006511	F:thiol-dependent ubiquitin-specific protease activity; P:protein deubiquitination; C:microtubule associated complex; P:ubiquitin-dependent protein catabolic process	EC:3.4.19.12	Ubiquitinyl hydrolase 1	IPR001578 (PRINTS); IPR001578 (PFAM); IPR036959 (G3DSA:3.40.532.GENE3D); IPR001578 (PANTHER); PTHR10589:SF24 (PANTHER); cd09616 (CDD); SSF54001 (SUPERFAMILY)	F:GO:0004843; C:GO:0005622; P:GO:0006511	F:thiol-dependent ubiquitin-specific protease activity; C:intracellular; P:ubiquitin-dependent protein catabolic process
GMOY006029-PA	ubiquitin carboxyl-terminal hydrolase	227	20	1.33828e-128	83.15	4	F:GO:0004843; P:GO:0016579; C:GO:0005875; P:GO:0006511	F:thiol-dependent ubiquitin-specific protease activity; P:protein deubiquitination; C:microtubule associated complex; P:ubiquitin-dependent protein catabolic process	EC:3.4.19.12	Ubiquitinyl hydrolase 1	IPR001578 (PRINTS); IPR001578 (PFAM); IPR036959 (G3DSA:3.40.532.GENE3D); PTHR10589:SF17 (PANTHER); IPR001578 (PANTHER); cd09616 (CDD); SSF54001 (SUPERFAMILY)	F:GO:0004843; C:GO:0005622; P:GO:0006511	F:thiol-dependent ubiquitin-specific protease activity; C:intracellular; P:ubiquitin-dependent protein catabolic process
GMOY013244-PA	probable enoyl- mitochondrial	293	20	0	90.8	2	F:GO:0003824; P:GO:0008152	F:catalytic activity; P:metabolic process			IPR001753 (PFAM); IPR014748 (G3DSA:1.10.12.GENE3D); G3DSA:3.90.226.10 (GENE3D); PTHR11941:SF54 (PANTHER); PTHR11941 (PANTHER); cd06558 (CDD); IPR029045 (SUPERFAMILY)	F:GO:0003824; P:GO:0008152	F:catalytic activity; P:metabolic process
GMOY010107-PA	ribonuclease UK114	138	20	1.31726e-88	89.65						IPR035959 (G3DSA:3.30.1330.GENE3D); IPR006056 (TIGRFAM); IPR006175 (PFAM); PTHR11803:SF13 (PANTHER); IPR006175 (PANTHER); cd00448 (CDD); IPR035959 (SUPERFAMILY)	no GO terms	no GO terms
GMOY012066-PA	yellow	415	20	0	81.35						IPR017996 (PRINTS); IPR011042 (G3DSA:2.120.10.GENE3D); IPR017996 (PFAM); IPR017996 (PANTHER); PTHR10009:SF11 (PANTHER); SSF63829 (SUPERFAMILY)	no GO terms	no GO terms
GMOY003850-PA	ADP-ribosylation factor 1	182	20	3.08747e-133	99.5	16	P:GO:0008360; C:GO:0032154; P:GO:0032011; P:GO:1902036; P:GO:0045807; P:GO:0015031; P:GO:0007155; P:GO:0006892; C:GO:0005795; P:GO:0048749; P:GO:0007269; F:GO:0005525; P:GO:0048488; F:GO:0003924; P:GO:0016197; P:GO:0010883	P:regulation of cell shape; C:cleavage furrow; P:ARF protein signal transduction; P:regulation of hematopoietic stem cell differentiation; P:positive regulation of endocytosis; P:protein transport; P:cell adhesion; P:post-Golgi vesicle-mediated transport; C:Golgi stack; P:compound eye development; P:neurotransmitter secretion; F:GTP binding; P:synaptic vesicle endocytosis; F:GTPase activity; P:en…	EC:3.6.1.15	Nucleoside-triphosphate phosphatase	IPR006689 (PRINTS); SM00175 (SMART); SM00177 (SMART); SM00178 (SMART); IPR006689 (PFAM); IPR005225 (TIGRFAM); G3DSA:3.40.50.300 (GENE3D); PTHR11711:SF291 (PANTHER); PTHR11711 (PANTHER); IPR024156 (PROSITE_PROFILES); cd04150 (CDD); IPR027417 (SUPERFAMILY)	F:GO:0005525; P:GO:0007264; C:GO:0005622	F:GTP binding; P:small GTPase mediated signal transduction; C:intracellular
GMOY009018-PA	PREDICTED: uncharacterized protein LOC106081891	1422	20	0	84.35	2	P:GO:0006869; F:GO:0005319	P:lipid transport; F:lipid transporter activity			IPR001747 (SMART); IPR015255 (SMART); IPR001747 (PFAM); G3DSA:2.20.80.10 (GENE3D); IPR015816 (G3DSA:2.30.230.GENE3D); IPR015255 (PFAM); IPR011030 (G3DSA:1.25.10.GENE3D); PTHR23345:SF16 (PANTHER); PTHR23345 (PANTHER); IPR001747 (PROSITE_PROFILES); IPR011030 (SUPERFAMILY); IPR015819 (SUPERFAMILY); IPR015819 (SUPERFAMILY)	P:GO:0006869; F:GO:0005319	P:lipid transport; F:lipid transporter activity
GMOY001831-PA	bleomycin hydrolase	682	20	0	89.45	3	P:GO:0006508; F:GO:0004197; C:GO:0005829	P:proteolysis; F:cysteine-type endopeptidase activity; C:cytosol	EC:3.4.22	Acting on peptide bonds (peptidases)	IPR004134 (PFAM); G3DSA:1.20.120.560 (GENE3D); G3DSA:3.90.70.10 (GENE3D); mobidb-lite (MOBIDB_LITE); IPR004134 (PANTHER); PTHR10363:SF2 (PANTHER); IPR004134 (CDD); SSF54001 (SUPERFAMILY)	P:GO:0006508; F:GO:0004197	P:proteolysis; F:cysteine-type endopeptidase activity
GMOY007193-PA	dihydrolipoyl mitochondrial	505	20	0	91.35	10	C:GO:0005811; P:GO:0006748; C:GO:0005947; F:GO:0050660; P:GO:0019233; P:GO:0006099; P:GO:0045454; C:GO:0005960; P:GO:0006546; F:GO:0004148	C:lipid particle; P:lipoamide metabolic process; C:mitochondrial alpha-ketoglutarate dehydrogenase complex; F:flavin adenine dinucleotide binding; P:sensory perception of pain; P:tricarboxylic acid cycle; P:cell redox homeostasis; C:glycine cleavage complex; P:glycine catabolic process; F:dihydrolipoyl dehydrogenase activity	EC:1.8.1.4	Dihydrolipoyl dehydrogenase	PR00411 (PRINTS); PR00368 (PRINTS); IPR001100 (PIRSF); IPR004099 (PFAM); G3DSA:3.40.50.720 (GENE3D); IPR016156 (G3DSA:3.30.390.GENE3D); G3DSA:3.40.50.720 (GENE3D); G3DSA:1.10.287.990 (GENE3D); IPR006258 (TIGRFAM); IPR023753 (PFAM); PTHR22912 (PANTHER); PTHR22912:SF151 (PANTHER); IPR036188 (SUPERFAMILY); IPR016156 (SUPERFAMILY)	F:GO:0016491; F:GO:0050660; F:GO:0009055; P:GO:0055114; P:GO:0045454; F:GO:0004148	F:oxidoreductase activity; F:flavin adenine dinucleotide binding; F:electron carrier activity; P:oxidation-reduction process; P:cell redox homeostasis; F:dihydrolipoyl dehydrogenase activity
GMOY004027-PA	aspartate cytoplasmic	386	20	0	81.7	5	F:GO:0030170; F:GO:0080130; P:GO:0006520; P:GO:0009058; F:GO:0004069	F:pyridoxal phosphate binding; F:L-phenylalanine:2-oxoglutarate aminotransferase activity; P:cellular amino acid metabolic process; P:biosynthetic process; F:L-aspartate:2-oxoglutarate aminotransferase activity	EC:2.6.1.9; EC:2.6.1.57; EC:2.6.1.5; EC:2.6.1.1	Histidinol-phosphate transaminase; Aromatic-amino-acid transaminase; Tyrosine transaminase; Aspartate transaminase	IPR000796 (PRINTS); IPR015422 (G3DSA:3.90.1150.GENE3D); IPR004839 (PFAM); IPR000796 (PANTHER); cd00609 (CDD); IPR015424 (SUPERFAMILY)	F:GO:0030170; F:GO:0003824; F:GO:0008483; P:GO:0006520; P:GO:0009058	F:pyridoxal phosphate binding; F:catalytic activity; F:transaminase activity; P:cellular amino acid metabolic process; P:biosynthetic process
GMOY004726-PA	male accessory gland serine protease inhibitor-like	85	20	1.28322e-23	75	4	F:GO:0004867; P:GO:0009617; P:GO:0046331; P:GO:0010951	F:serine-type endopeptidase inhibitor activity; P:response to bacterium; P:lateral inhibition; P:negative regulation of endopeptidase activity			IPR002223 (PRINTS); IPR002223 (SMART); IPR036880 (G3DSA:4.10.410.GENE3D); IPR002223 (PFAM); PTHR10083:SF308 (PANTHER); PTHR10083 (PANTHER); IPR002223 (PROSITE_PROFILES); IPR002223 (CDD); IPR036880 (SUPERFAMILY)	F:GO:0004867	F:serine-type endopeptidase inhibitor activity
GMOY008503-PA	ferritin heavy chain	222	20	9.91904e-167	85.35	6	P:GO:0006879; C:GO:0005623; F:GO:0008199; P:GO:0006826; P:GO:0055114; F:GO:0004322	P:cellular iron ion homeostasis; C:cell; F:ferric iron binding; P:iron ion transport; P:oxidation-reduction process; F:ferroxidase activity	EC:1.16.3.1; EC:1.16.3	Ferroxidase; Oxidizing metal ions	IPR012347 (G3DSA:1.20.1260.GENE3D); IPR008331 (PFAM); IPR001519 (PANTHER); PTHR11431:SF51 (PANTHER); IPR009040 (PROSITE_PROFILES); cd01056 (CDD); IPR009078 (SUPERFAMILY)	P:GO:0006879; F:GO:0008199; P:GO:0006826	P:cellular iron ion homeostasis; F:ferric iron binding; P:iron ion transport
GMOY011666-PA	translationally-controlled tumor homolog	183	20	3.39257e-113	94.4	3	C:GO:0045298; C:GO:0005737; F:GO:0005509	C:tubulin complex; C:cytoplasm; F:calcium ion binding			IPR018105 (PRINTS); IPR018105 (PFAM); G3DSA:2.170.150.10 (GENE3D); IPR018105 (PANTHER); PTHR11991:SF0 (PANTHER); IPR034737 (PROSITE_PROFILES); IPR011057 (SUPERFAMILY)	no GO terms	no GO terms
GMOY003656-PA	leukocyte elastase inhibitor	395	20	0	82.2	5	C:GO:0005615; F:GO:0004867; P:GO:0032504; P:GO:0006508; F:GO:0008233	C:extracellular space; F:serine-type endopeptidase inhibitor activity; P:multicellular organism reproduction; P:proteolysis; F:peptidase activity			IPR023796 (SMART); G3DSA:3.30.497.10 (GENE3D); G3DSA:2.30.39.10 (GENE3D); IPR023796 (PFAM); IPR000215 (PANTHER); PTHR11461:SF206 (PANTHER); cd00172 (CDD); IPR036186 (SUPERFAMILY)	C:GO:0005615	C:extracellular space
GMOY004107-PA	nucleosome assembly 1 paralog	368	20	0	88.75	5	C:GO:0005634; P:GO:0043085; P:GO:0000290; F:GO:0008047; P:GO:0006334	C:nucleus; P:positive regulation of catalytic activity; P:deadenylation-dependent decapping of nuclear-transcribed mRNA; F:enzyme activator activity; P:nucleosome assembly			IPR002164 (PFAM); mobidb-lite (MOBIDB_LITE); mobidb-lite (MOBIDB_LITE); IPR002164 (PANTHER); PTHR11875:SF102 (PANTHER); IPR037231 (SUPERFAMILY)	C:GO:0005634; P:GO:0006334	C:nucleus; P:nucleosome assembly
GMOY001033-PA	phosphoglycerate kinase	413	20	0	90.55	3	F:GO:0005524; F:GO:0004618; P:GO:0006096	F:ATP binding; F:phosphoglycerate kinase activity; P:glycolytic process	EC:2.7.2.3	Phosphoglycerate kinase	IPR001576 (PRINTS); IPR001576 (PIRSF); IPR015824 (G3DSA:3.40.50.GENE3D); IPR015824 (G3DSA:3.40.50.GENE3D); IPR001576 (PFAM); IPR001576 (PANTHER); PTHR11406:SF10 (PANTHER); IPR001576 (CDD); IPR036043 (SUPERFAMILY)	F:GO:0004618; P:GO:0006096	F:phosphoglycerate kinase activity; P:glycolytic process
GMOY002053-PA	dihydrolipoyllysine-residue succinyltransferase component of 2-oxoglutarate dehydrogenase mitochondrial	452	20	5.33711e-162	91.4	3	F:GO:0004149; C:GO:0045252; P:GO:0006099	F:dihydrolipoyllysine-residue succinyltransferase activity; C:oxoglutarate dehydrogenase complex; P:tricarboxylic acid cycle	EC:2.3.1.61	Dihydrolipoyllysine-residue succinyltransferase	G3DSA:3.30.559.10 (GENE3D); G3DSA:3.90.1170.30 (GENE3D); G3DSA:2.40.50.100 (GENE3D); IPR000089 (PFAM); IPR006255 (TIGRFAM); IPR001078 (PFAM); mobidb-lite (MOBIDB_LITE); PTHR43416:SF5 (PANTHER); PTHR43416 (PANTHER); IPR000089 (PROSITE_PROFILES); cd06849 (CDD); SSF52777 (SUPERFAMILY); IPR011053 (SUPERFAMILY)	F:GO:0004149; F:GO:0016746; C:GO:0045252; P:GO:0008152; P:GO:0006099	F:dihydrolipoyllysine-residue succinyltransferase activity; F:transferase activity, transferring acyl groups; C:oxoglutarate dehydrogenase complex; P:metabolic process; P:tricarboxylic acid cycle
GMOY007954-PA	phosphoglycerate mutase 1	303	20	1.90398e-157	88.2	2	P:GO:0006096; F:GO:0004619	P:glycolytic process; F:phosphoglycerate mutase activity	EC:5.4.2.1	Intramolecular transferases	IPR013078 (SMART); PIRSF000709 (PIRSF); IPR029033 (G3DSA:3.40.50.GENE3D); IPR005952 (TIGRFAM); IPR013078 (PFAM); PTHR11931:SF15 (PANTHER); IPR005952 (PANTHER); IPR005952 (HAMAP); IPR013078 (CDD); IPR029033 (SUPERFAMILY)	F:GO:0016868; P:GO:0006096; F:GO:0004619	F:intramolecular transferase activity, phosphotransferases; P:glycolytic process; F:phosphoglycerate mutase activity
GMOY000015-PA	adenosylhomocysteinase	450	20	0	88.95	2	F:GO:0004013; P:GO:0006730	F:adenosylhomocysteinase activity; P:one-carbon metabolic process	EC:3.3.1.1	Adenosylhomocysteinase	IPR000043 (SMART); IPR015878 (SMART); IPR000043 (PIRSF); IPR015878 (PFAM); IPR000043 (TIGRFAM); G3DSA:3.40.50.1480 (GENE3D); G3DSA:3.40.50.1480 (GENE3D); IPR000043 (PFAM); IPR000043 (PANTHER); IPR000043 (PANTHER); PTHR23420:SF0 (PANTHER); PTHR23420:SF0 (PANTHER); IPR034373 (HAMAP); IPR000043 (CDD); SSF52283 (SUPERFAMILY); IPR036291 (SUPERFAMILY)	F:GO:0051287; P:GO:0019510; F:GO:0004013	F:NAD binding; P:S-adenosylhomocysteine catabolic process; F:adenosylhomocysteinase activity
GMOY004289-PA	isoleucine--tRNA cytoplasmic	1235	20	0	87.35	6	P:GO:0006428; F:GO:0005524; F:GO:0004822; C:GO:0005737; P:GO:0006450; F:GO:0002161	P:isoleucyl-tRNA aminoacylation; F:ATP binding; F:isoleucine-tRNA ligase activity; C:cytoplasm; P:regulation of translational fidelity; F:aminoacyl-tRNA editing activity	EC:6.1.1.5; EC:3.1.1.1	Isoleucine--tRNA ligase; Carboxylesterase	IPR002301 (PRINTS); IPR002301 (TIGRFAM); G3DSA:1.10.730.10 (GENE3D); IPR013155 (PFAM); IPR002300 (PFAM); IPR009008 (G3DSA:3.90.740.GENE3D); IPR014729 (G3DSA:3.40.50.GENE3D); PTHR42780 (PANTHER); IPR023586 (HAMAP); cd00818 (CDD); IPR033709 (CDD); IPR009080 (SUPERFAMILY); IPR009008 (SUPERFAMILY); SSF52374 (SUPERFAMILY)	P:GO:0006428; F:GO:0000166; F:GO:0005524; P:GO:0006418; F:GO:0004812; F:GO:0004822; C:GO:0005737; F:GO:0002161; F:GO:0000049	P:isoleucyl-tRNA aminoacylation; F:nucleotide binding; F:ATP binding; P:tRNA aminoacylation for protein translation; F:aminoacyl-tRNA ligase activity; F:isoleucine-tRNA ligase activity; C:cytoplasm; F:aminoacyl-tRNA editing activity; F:tRNA binding
GMOY012105-PA	PREDICTED: uncharacterized protein LOC101898731 isoform X2	1655	20	0	71.8						IPR007722 (SMART); IPR011993 (G3DSA:2.30.29.GENE3D); PF13649 (PFAM); G3DSA:3.30.46.10 (GENE3D); IPR007722 (PFAM); G3DSA:3.90.79.10 (GENE3D); G3DSA:3.40.50.150 (GENE3D); mobidb-lite (MOBIDB_LITE); mobidb-lite (MOBIDB_LITE); mobidb-lite (MOBIDB_LITE); mobidb-lite (MOBIDB_LITE); mobidb-lite (MOBIDB_LITE); PTHR21219:SF4 (PANTHER); PTHR21219 (PANTHER); IPR014369 (PROSITE_PROFILES); cd02440 (CDD); IPR0…	F:GO:0003723; F:GO:0017174; F:GO:0030145; F:GO:0016787	F:RNA binding; F:glycine N-methyltransferase activity; F:manganese ion binding; F:hydrolase activity
GMOY011925-PA	Serine threonine- phosphatase alpha-1 isoform	302	20	0	99.25	3	F:GO:0004721; F:GO:0046872; P:GO:0006470	F:phosphoprotein phosphatase activity; F:metal ion binding; P:protein dephosphorylation	EC:3.1.3.16; EC:3.1.3.41	Protein-serine/threonine phosphatase; 4-nitrophenylphosphatase	IPR006186 (PRINTS); IPR006186 (SMART); IPR029052 (G3DSA:3.60.21.GENE3D); IPR004843 (PFAM); IPR031675 (PFAM); PTHR11668:SF204 (PANTHER); PTHR11668 (PANTHER); cd07414 (CDD); IPR029052 (SUPERFAMILY)	F:GO:0016787	F:hydrolase activity
GMOY004139-PA	---NA---	3154									mobidb-lite (MOBIDB_LITE); mobidb-lite (MOBIDB_LITE); mobidb-lite (MOBIDB_LITE); mobidb-lite (MOBIDB_LITE); mobidb-lite (MOBIDB_LITE); mobidb-lite (MOBIDB_LITE); mobidb-lite (MOBIDB_LITE); mobidb-lite (MOBIDB_LITE); mobidb-lite (MOBIDB_LITE); mobidb-lite (MOBIDB_LITE); mobidb-lite (MOBIDB_LITE); mobidb-lite (MOBIDB_LITE); mobidb-lite (MOBIDB_LITE); mobidb-lite (MOBIDB_LITE); mobidb-lite (MOBIDB_L…	no GO terms	no GO terms
GMOY010887-PA	glutathione S-transferase 1	264	20	5.18281e-142	88.75	1	F:GO:0016740	F:transferase activity			G3DSA:1.20.1050.10 (GENE3D); IPR004045 (PFAM); G3DSA:3.40.30.10 (GENE3D); IPR004046 (PFAM); PTHR43969 (PANTHER); PTHR43969:SF3 (PANTHER); IPR010987 (PROSITE_PROFILES); IPR004045 (PROSITE_PROFILES); cd03045 (CDD); cd03177 (CDD); IPR036249 (SUPERFAMILY); IPR036282 (SUPERFAMILY)	F:GO:0005515	F:protein binding
GMOY008318-PA	hypothetical protein FF38_08796	1336	20	0	57.6						IPR018849 (PFAM)	no GO terms	no GO terms
GMOY006698-PA	fructose-1,6-bisphosphatase 1 isoform X1	314	20	0	88.15	3	P:GO:0005975; F:GO:0042132; P:GO:0016311	P:carbohydrate metabolic process; F:fructose 1,6-bisphosphate 1-phosphatase activity; P:dephosphorylation	EC:3.1.3.23; EC:3.1.3.11; EC:3.1.3.41	Sugar-phosphatase; Fructose-bisphosphatase; 4-nitrophenylphosphatase	IPR028343 (PRINTS); IPR028343 (PIRSF); IPR033391 (PFAM); G3DSA:3.30.540.10 (GENE3D); G3DSA:3.40.190.80 (GENE3D); IPR000146 (PIRSF); G3DSA:3.30.540.10 (GENE3D); IPR000146 (PANTHER); PTHR11556:SF13 (PANTHER); PTHR11556:SF13 (PANTHER); IPR000146 (PANTHER); IPR000146 (CDD); SSF56655 (SUPERFAMILY)	P:GO:0005975; F:GO:0042132; F:GO:0016791	P:carbohydrate metabolic process; F:fructose 1,6-bisphosphate 1-phosphatase activity; F:phosphatase activity
GMOY006840-PA	---NA---	73									mobidb-lite (MOBIDB_LITE)	no GO terms	no GO terms
GMOY008511-PA	vigilin isoform X1	1167	20	0	89.75	1	F:GO:0003723	F:RNA binding			IPR004087 (SMART); IPR004088 (PFAM); IPR036612 (G3DSA:3.30.1370.GENE3D); IPR036612 (G3DSA:3.30.1370.GENE3D); IPR036612 (G3DSA:3.30.1370.GENE3D); IPR036612 (G3DSA:3.30.1370.GENE3D); IPR036612 (G3DSA:3.30.1370.GENE3D); IPR036612 (G3DSA:3.30.1370.GENE3D); IPR036612 (G3DSA:3.30.1370.GENE3D); IPR036612 (G3DSA:3.30.1370.GENE3D); mobidb-lite (MOBIDB_LITE); mobidb-lite (MOBIDB_LITE); PTHR10627:SF30 (PANT…	F:GO:0003676; F:GO:0003723	F:nucleic acid binding; F:RNA binding
GMOY004140-PA	transitional endoplasmic reticulum ATPase TER94 isoform X1	866	20	0	93.25	2	F:GO:0005524; F:GO:0016787	F:ATP binding; F:hydrolase activity			IPR003338 (SMART); IPR003593 (SMART); IPR004201 (SMART); IPR003338 (PFAM); IPR003959 (PFAM); G3DSA:2.40.40.20 (GENE3D); G3DSA:1.10.8.60 (GENE3D); IPR029067 (G3DSA:3.10.330.GENE3D); G3DSA:1.10.8.60 (GENE3D); IPR004201 (PFAM); G3DSA:3.40.50.300 (GENE3D); IPR005938 (TIGRFAM); IPR015415 (PFAM); mobidb-lite (MOBIDB_LITE); mobidb-lite (MOBIDB_LITE); PTHR23077:SF69 (PANTHER); PTHR23077 (PANTHER); cd0000…	F:GO:0005524; F:GO:0016787	F:ATP binding; F:hydrolase activity
GMOY011942-PA	speract receptor-like isoform X1	1777	20	0	78.85	8	F:GO:0005524; P:GO:0006182; C:GO:0016021; F:GO:0004383; F:GO:0004672; P:GO:0006468; C:GO:0005622; P:GO:0035556	F:ATP binding; P:cGMP biosynthetic process; C:integral component of membrane; F:guanylate cyclase activity; F:protein kinase activity; P:protein phosphorylation; C:intracellular; P:intracellular signal transduction	EC:4.6.1.2	Guanylate cyclase	IPR001054 (SMART); IPR001054 (PFAM); G3DSA:1.10.510.10 (GENE3D); IPR001245 (PFAM); G3DSA:3.40.50.2300 (GENE3D); G3DSA:3.30.200.20 (GENE3D); IPR029787 (G3DSA:3.30.70.GENE3D); IPR001828 (PFAM); mobidb-lite (MOBIDB_LITE); PTHR11920 (PANTHER); PTHR11920:SF448 (PANTHER); IPR000719 (PROSITE_PROFILES); IPR001054 (PROSITE_PROFILES); cd14042 (CDD); cd07302 (CDD); IPR011009 (SUPERFAMILY); IPR029787 (SUPERF…	F:GO:0005524; F:GO:0016849; F:GO:0004672; P:GO:0006468; P:GO:0035556; P:GO:0009190	F:ATP binding; F:phosphorus-oxygen lyase activity; F:protein kinase activity; P:protein phosphorylation; P:intracellular signal transduction; P:cyclic nucleotide biosynthetic process
GMOY010090-PA	bifunctional purine biosynthesis PURH	574	20	0	89.05	4	P:GO:0042060; P:GO:0006164; F:GO:0003937; F:GO:0004643	P:wound healing; P:purine nucleotide biosynthetic process; F:IMP cyclohydrolase activity; F:phosphoribosylaminoimidazolecarboxamide formyltransferase activity	EC:3.5.4.10; EC:2.1.2.3	IMP cyclohydrolase; Phosphoribosylaminoimidazolecarboxamide formyltransferase	IPR002695 (SMART); IPR011607 (SMART); IPR002695 (TIGRFAM); IPR036914 (G3DSA:3.40.50.GENE3D); IPR002695 (PFAM); IPR002695 (PIRSF); IPR011607 (PFAM); IPR024051 (G3DSA:3.40.140.GENE3D); IPR024051 (G3DSA:3.40.140.GENE3D); IPR002695 (PANTHER); cd01421 (CDD); IPR036914 (SUPERFAMILY); IPR016193 (SUPERFAMILY)	P:GO:0006164; F:GO:0003824; F:GO:0003937; F:GO:0004643	P:purine nucleotide biosynthetic process; F:catalytic activity; F:IMP cyclohydrolase activity; F:phosphoribosylaminoimidazolecarboxamide formyltransferase activity
GMOY009534-PA	regucalcin isoform X2	375	20	0	80.7	1	C:GO:0016020	C:membrane			IPR005511 (PRINTS); IPR011042 (G3DSA:2.120.10.GENE3D); IPR013658 (PFAM); PTHR10907 (PANTHER); PTHR10907:SF47 (PANTHER); PS51257 (PROSITE_PROFILES); SSF63829 (SUPERFAMILY)	no GO terms	no GO terms
GMOY005690-PA	ubiquitin-60S ribosomal L40	128	20	1.97647e-90	99.25	7	F:GO:0003735; P:GO:0002181; C:GO:0022625; F:GO:0031386; C:GO:0005875; P:GO:0006511; P:GO:0016567	F:structural constituent of ribosome; P:cytoplasmic translation; C:cytosolic large ribosomal subunit; F:protein tag; C:microtubule associated complex; P:ubiquitin-dependent protein catabolic process; P:protein ubiquitination			IPR019956 (PRINTS); IPR001975 (SMART); IPR000626 (SMART); IPR001975 (PFAM); IPR000626 (PFAM); G3DSA:3.10.20.90 (GENE3D); PTHR10666:SF255 (PANTHER); PTHR10666 (PANTHER); IPR000626 (PROSITE_PROFILES); cd01803 (CDD); IPR029071 (SUPERFAMILY)	F:GO:0005515; F:GO:0003735; C:GO:0005840; P:GO:0006412	F:protein binding; F:structural constituent of ribosome; C:ribosome; P:translation
GMOY011752-PA	glyoxalase domain-containing 4	360	20	8.49537e-158	78.95						IPR029068 (G3DSA:3.10.180.GENE3D); IPR029068 (G3DSA:3.10.180.GENE3D); PTHR10374:SF20 (PANTHER); PTHR10374 (PANTHER); cd16357 (CDD); IPR029068 (SUPERFAMILY); IPR029068 (SUPERFAMILY)	no GO terms	no GO terms
GMOY012084-PA	glucose-6-phosphate isomerase	560	20	0	83.15	5	C:GO:0005811; F:GO:0004347; P:GO:0006094; C:GO:0005737; P:GO:0006096	C:lipid particle; F:glucose-6-phosphate isomerase activity; P:gluconeogenesis; C:cytoplasm; P:glycolytic process	EC:5.3.1.9	Glucose-6-phosphate isomerase	IPR001672 (PRINTS); G3DSA:3.40.50.10490 (GENE3D); IPR023096 (G3DSA:1.10.1390.GENE3D); G3DSA:3.40.50.10490 (GENE3D); IPR001672 (PFAM); G3DSA:3.40.50.10490 (GENE3D); PTHR11469:SF5 (PANTHER); IPR001672 (PANTHER); IPR001672 (PROSITE_PROFILES); IPR001672 (HAMAP); IPR035476 (CDD); IPR035482 (CDD); SSF53697 (SUPERFAMILY)	F:GO:0004347; P:GO:0006094; P:GO:0006096	F:glucose-6-phosphate isomerase activity; P:gluconeogenesis; P:glycolytic process
GMOY012179-PA	acetyl- mitochondrial	410	20	0	93.05	2	F:GO:0016747; P:GO:0008152	F:transferase activity, transferring acyl groups other than amino-acyl groups; P:metabolic process			IPR016039 (G3DSA:3.40.47.GENE3D); IPR020616 (PFAM); IPR016039 (G3DSA:3.40.47.GENE3D); IPR020617 (PFAM); IPR002155 (TIGRFAM); IPR002155 (PIRSF); PTHR18919 (PANTHER); PTHR18919:SF81 (PANTHER); IPR002155 (CDD); IPR016039 (SUPERFAMILY); IPR016039 (SUPERFAMILY)	F:GO:0016747; F:GO:0003824; P:GO:0008152	F:transferase activity, transferring acyl groups other than amino-acyl groups; F:catalytic activity; P:metabolic process
GMOY005703-PA	myosin heavy muscle isoform X14	2332	20	0	89.95	4	C:GO:0016459; F:GO:0005524; F:GO:0003779; F:GO:0003774	C:myosin complex; F:ATP binding; F:actin binding; F:motor activity	EC:3.6.1.15	Nucleoside-triphosphate phosphatase	IPR001609 (PRINTS); IPR001609 (SMART); IPR000048 (SMART); IPR008989 (G3DSA:2.30.30.GENE3D); G3DSA:1.20.5.340 (GENE3D); IPR002928 (PFAM); G3DSA:1.10.287.620 (GENE3D); IPR001609 (PFAM); IPR004009 (PFAM); G3DSA:4.10.270.10 (GENE3D); G3DSA:1.20.5.340 (GENE3D); mobidb-lite (MOBIDB_LITE); mobidb-lite (MOBIDB_LITE); mobidb-lite (MOBIDB_LITE); PTHR13140 (PANTHER); PTHR13140 (PANTHER); PTHR13140:SF728 (PA…	F:GO:0051015; F:GO:0005524; C:GO:0016459; F:GO:0005515; F:GO:0003774	F:actin filament binding; F:ATP binding; C:myosin complex; F:protein binding; F:motor activity
GMOY009591-PA	disulfide-isomerase	508	20	0	88.35	3	F:GO:0003756; C:GO:0005783; P:GO:0045454	F:protein disulfide isomerase activity; C:endoplasmic reticulum; P:cell redox homeostasis	EC:5.3.4.1	Protein disulfide-isomerase	PR00421 (PRINTS); IPR005788 (TIGRFAM); IPR005792 (TIGRFAM); G3DSA:3.40.30.10 (GENE3D); G3DSA:3.40.30.10 (GENE3D); IPR013766 (PFAM); G3DSA:3.40.30.10 (GENE3D); PF13848 (PFAM); G3DSA:3.40.30.10 (GENE3D); mobidb-lite (MOBIDB_LITE); PTHR18929:SF101 (PANTHER); PTHR18929 (PANTHER); IPR013766 (PROSITE_PROFILES); IPR013766 (PROSITE_PROFILES); cd02995 (CDD); cd02981 (CDD); cd02961 (CDD); cd02982 (CDD); IP…	C:GO:0005783; P:GO:0045454; F:GO:0016853	C:endoplasmic reticulum; P:cell redox homeostasis; F:isomerase activity
GMOY013047-PA	profilin	126	20	1.22016e-89	96.05	24	P:GO:0007391; P:GO:0000915; P:GO:0007283; P:GO:0036098; P:GO:0030041; P:GO:0007300; P:GO:0051491; P:GO:0007411; P:GO:0007488; P:GO:0007420; P:GO:0035193; P:GO:0007436; C:GO:0043005; P:GO:0032507; P:GO:0042060; C:GO:0005856; C:GO:0048471; P:GO:0048680; F:GO:0003779; P:GO:0000281; P:GO:0030717; P:GO:0045451; P:GO:0035019; P:GO:0016322	P:dorsal closure; P:actomyosin contractile ring assembly; P:spermatogenesis; P:male germ-line stem cell population maintenance; P:actin filament polymerization; P:ovarian nurse cell to oocyte transport; P:positive regulation of filopodium assembly; P:axon guidance; P:histoblast morphogenesis; P:brain development; P:larval central nervous system remodeling; P:larval salivary gland morphogenesis; C…			IPR005455 (PRINTS); IPR005455 (PRINTS); IPR005455 (SMART); G3DSA:3.30.450.30 (GENE3D); IPR005455 (PFAM); IPR005455 (PANTHER); PTHR11604:SF0 (PANTHER); IPR005455 (CDD); IPR036140 (SUPERFAMILY)	no GO terms	no GO terms
GMOY009541-PA	---NA---	218									no IPS match	no IPS match	no IPS match
GMOY006372-PA	endoplasmin homolog	803	20	0	89.85	9	C:GO:0005811; F:GO:0005524; C:GO:0005615; P:GO:0007494; P:GO:0061031; C:GO:0012505; F:GO:0051082; P:GO:0006457; P:GO:0006950	C:lipid particle; F:ATP binding; C:extracellular space; P:midgut development; P:endodermal digestive tract morphogenesis; C:endomembrane system; F:unfolded protein binding; P:protein folding; P:response to stress			IPR020575 (PRINTS); IPR003594 (SMART); IPR036890 (G3DSA:3.30.565.GENE3D); IPR001404 (PFAM); IPR001404 (PIRSF); IPR003594 (PFAM); mobidb-lite (MOBIDB_LITE); mobidb-lite (MOBIDB_LITE); PTHR11528:SF73 (PANTHER); IPR001404 (PANTHER); IPR003594 (CDD); IPR020568 (SUPERFAMILY); IPR036890 (SUPERFAMILY); IPR037196 (SUPERFAMILY)	F:GO:0005524; F:GO:0051082; P:GO:0006457; P:GO:0006950	F:ATP binding; F:unfolded protein binding; P:protein folding; P:response to stress
GMOY005064-PA	V-type proton ATPase catalytic subunit A	643	20	0	90.9	10	C:GO:0000221; F:GO:0005524; C:GO:0033181; P:GO:0015991; P:GO:0048388; P:GO:0046034; P:GO:0016197; F:GO:0046961; P:GO:0035149; P:GO:0007446	C:vacuolar proton-transporting V-type ATPase, V1 domain; F:ATP binding; C:plasma membrane proton-transporting V-type ATPase complex; P:ATP hydrolysis coupled proton transport; P:endosomal lumen acidification; P:ATP metabolic process; P:endosomal transport; F:proton-transporting ATPase activity, rotational mechanism; P:lumen formation, open tracheal system; P:imaginal disc growth	EC:3.6.1.3; EC:3.6.1.15	Adenosinetriphosphatase; Nucleoside-triphosphate phosphatase	IPR000194 (PFAM); IPR031686 (PFAM); G3DSA:3.40.50.300 (GENE3D); IPR024034 (G3DSA:1.10.1140.GENE3D); G3DSA:2.40.50.100 (GENE3D); IPR023366 (G3DSA:2.40.30.GENE3D); IPR004100 (PFAM); IPR005725 (TIGRFAM); mobidb-lite (MOBIDB_LITE); PTHR43607:SF4 (PANTHER); IPR022878 (PANTHER); IPR022878 (HAMAP); cd01134 (CDD); IPR027417 (SUPERFAMILY); IPR036121 (SUPERFAMILY); SSF47917 (SUPERFAMILY)	F:GO:0005524; P:GO:0015992; P:GO:0015991; P:GO:0046034; F:GO:0046961; C:GO:0033180	F:ATP binding; P:proton transport; P:ATP hydrolysis coupled proton transport; P:ATP metabolic process; F:proton-transporting ATPase activity, rotational mechanism; C:proton-transporting V-type ATPase, V1 domain
GMOY012309-PA	lethal(2)essential for life	136	20	5.99397e-84	93.25						IPR001436 (PRINTS); IPR001436 (PIRSF); IPR008978 (G3DSA:2.60.40.GENE3D); IPR002068 (PFAM); IPR031107 (PANTHER); PTHR11527:SF255 (PANTHER); IPR002068 (PROSITE_PROFILES); cd06526 (CDD); IPR008978 (SUPERFAMILY)	no GO terms	no GO terms
GMOY002642-PA	lethal(2)essential for life	220	20	5.0939e-90	77.7						IPR001436 (PRINTS); IPR002068 (PFAM); IPR008978 (G3DSA:2.60.40.GENE3D); IPR001436 (PIRSF); mobidb-lite (MOBIDB_LITE); PTHR11527:SF243 (PANTHER); IPR031107 (PANTHER); cd06526 (CDD)	no GO terms	no GO terms
GMOY005837-PA	sarcoplasmic calcium-binding alpha-B and -A chains	189	20	9.69251e-121	91.55	1	F:GO:0005509	F:calcium ion binding			IPR002048 (SMART); G3DSA:1.10.1330.10 (GENE3D); G3DSA:1.10.238.10 (GENE3D); IPR002048 (PFAM); G3DSA:1.10.238.10 (GENE3D); G3DSA:1.10.238.10 (GENE3D); IPR002048 (PFAM); IPR002048 (PROSITE_PROFILES); IPR002048 (PROSITE_PROFILES); IPR002048 (PROSITE_PROFILES); IPR011992 (SUPERFAMILY)	F:GO:0005509	F:calcium ion binding
GMOY013293-PA	angiotensin-converting enzyme	571	20	0	81.55	8	F:GO:0004180; F:GO:0016491; F:GO:0046872; F:GO:0008241; P:GO:0006508; C:GO:0016021; P:GO:0055114; F:GO:0008237	F:carboxypeptidase activity; F:oxidoreductase activity; F:metal ion binding; F:peptidyl-dipeptidase activity; P:proteolysis; C:integral component of membrane; P:oxidation-reduction process; F:metallopeptidase activity	EC:3.4.15	Acting on peptide bonds (peptidases)	IPR001548 (PRINTS); G3DSA:1.10.1370.10 (GENE3D); IPR001548 (PFAM); PTHR10514:SF34 (PANTHER); IPR001548 (PANTHER); SSF55486 (SUPERFAMILY)	F:GO:0008241; P:GO:0006508; C:GO:0016020; F:GO:0008237	F:peptidyl-dipeptidase activity; P:proteolysis; C:membrane; F:metallopeptidase activity
GMOY002913-PA	T-complex 1 subunit beta	532	20	0	93.7	4	F:GO:0005524; C:GO:0005737; F:GO:0051082; P:GO:0006457	F:ATP binding; C:cytoplasm; F:unfolded protein binding; P:protein folding			IPR017998 (PRINTS); IPR012716 (TIGRFAM); IPR002423 (PFAM); IPR027409 (G3DSA:3.50.7.GENE3D); IPR027413 (G3DSA:1.10.560.GENE3D); IPR027413 (G3DSA:1.10.560.GENE3D); IPR012716 (PTHR11353:PANTHER); IPR002423 (PANTHER); IPR012716 (CDD); IPR037290 (SUPERFAMILY); IPR027413 (SUPERFAMILY); IPR027409 (SUPERFAMILY)	F:GO:0005524; F:GO:0051082; P:GO:0006457	F:ATP binding; F:unfolded protein binding; P:protein folding
GMOY002434-PA	---NA---	205									no IPS match	no IPS match	no IPS match
GMOY009244-PA	calcium-transporting ATPase sarcoplasmic endoplasmic reticulum type isoform X2	1002	20	0	97.4	23	P:GO:0060047; P:GO:0007274; P:GO:0008610; P:GO:0051282; P:GO:1901896; F:GO:0005388; P:GO:0006874; C:GO:0005635; C:GO:0005811; F:GO:0005524; P:GO:0006635; F:GO:0005515; P:GO:0010906; P:GO:0048863; F:GO:0046872; P:GO:0007629; P:GO:0030707; C:GO:0016021; P:GO:0070588; P:GO:0036335; P:GO:0030322; P:GO:0010884; C:GO:0033017	P:heart contraction; P:neuromuscular synaptic transmission; P:lipid biosynthetic process; P:regulation of sequestering of calcium ion; P:positive regulation of calcium-transporting ATPase activity; F:calcium-transporting ATPase activity; P:cellular calcium ion homeostasis; C:nuclear envelope; C:lipid particle; F:ATP binding; P:fatty acid beta-oxidation; F:protein binding; P:regulation of glucose …	EC:3.6.1.3; EC:3.6.3.8; EC:3.6.1.15	Adenosinetriphosphatase; Calcium-transporting ATPase; Nucleoside-triphosphate phosphatase	PR00119 (PRINTS); IPR004014 (SMART); PF00122 (PFAM); G3DSA:2.70.150.10 (GENE3D); IPR004014 (PFAM); PF13246 (PFAM); IPR005782 (TIGRFAM); G3DSA:1.20.1110.10 (GENE3D); IPR006068 (PFAM); IPR023299 (G3DSA:3.40.1110.GENE3D); PF08282 (PFAM); IPR001757 (TIGRFAM); PTHR42861 (PANTHER); PTHR42861:SF18 (PANTHER); cd02083 (CDD); IPR023298 (SUPERFAMILY); IPR008250 (SUPERFAMILY); IPR036412 (SUPERFAMILY); IPR023…	F:GO:0000166; P:GO:0006816; C:GO:0016021; F:GO:0005388	F:nucleotide binding; P:calcium ion transport; C:integral component of membrane; F:calcium-transporting ATPase activity
GMOY002007-PA	NADP-dependent malic enzyme isoform X1	661	20	0	88.5	6	P:GO:0006108; F:GO:0046872; F:GO:0051287; C:GO:0016021; F:GO:0004471; P:GO:0055114	P:malate metabolic process; F:metal ion binding; F:NAD binding; C:integral component of membrane; F:malate dehydrogenase (decarboxylating) (NAD+) activity; P:oxidation-reduction process	EC:1.1.1.38; EC:1.1.1.39	Malate dehydrogenase (oxaloacetate-decarboxylating); Malate dehydrogenase (decarboxylating)	IPR001891 (PRINTS); IPR012301 (SMART); IPR012302 (SMART); IPR037062 (G3DSA:3.40.50.GENE3D); G3DSA:3.40.50.720 (GENE3D); IPR001891 (PIRSF); IPR012301 (PFAM); IPR012302 (PFAM); PTHR23406 (PANTHER); cd05312 (CDD); IPR036291 (SUPERFAMILY); SSF53223 (SUPERFAMILY)	F:GO:0051287; F:GO:0004470; F:GO:0004471; P:GO:0055114	F:NAD binding; F:malic enzyme activity; F:malate dehydrogenase (decarboxylating) (NAD+) activity; P:oxidation-reduction process
GMOY009975-PA	annexin B9 isoform X3	326	20	0	90.4	10	F:GO:0003779; F:GO:0030507; C:GO:0005938; F:GO:0005509; P:GO:0030011; C:GO:0012505; P:GO:0010797; P:GO:0048190; P:GO:0061467; F:GO:0005544	F:actin binding; F:spectrin binding; C:cell cortex; F:calcium ion binding; P:maintenance of cell polarity; C:endomembrane system; P:regulation of multivesicular body size involved in endosome transport; P:wing disc dorsal/ventral pattern formation; P:basolateral protein localization; F:calcium-dependent phospholipid binding			IPR001464 (PRINTS); IPR018502 (SMART); IPR018502 (PFAM); IPR037104 (G3DSA:1.10.220.GENE3D); IPR037104 (G3DSA:1.10.220.GENE3D); IPR037104 (G3DSA:1.10.220.GENE3D); PTHR10502 (PANTHER); PTHR10502 (PANTHER); PTHR10502:SF140 (PANTHER); PTHR10502:SF140 (PANTHER); SSF47874 (SUPERFAMILY)	F:GO:0005509; F:GO:0005544	F:calcium ion binding; F:calcium-dependent phospholipid binding
GMOY009575-PA	annexin B10 isoform X2	319	20	0	87	2	F:GO:0005509; F:GO:0005544	F:calcium ion binding; F:calcium-dependent phospholipid binding			IPR001464 (PRINTS); IPR002391 (PRINTS); IPR018502 (SMART); IPR037104 (G3DSA:1.10.220.GENE3D); IPR018502 (PFAM); IPR037104 (G3DSA:1.10.220.GENE3D); IPR037104 (G3DSA:1.10.220.GENE3D); IPR037104 (G3DSA:1.10.220.GENE3D); PTHR10502 (PANTHER); PTHR10502:SF173 (PANTHER); SSF47874 (SUPERFAMILY)	F:GO:0005509; F:GO:0005544	F:calcium ion binding; F:calcium-dependent phospholipid binding
GMOY009585-PA	annexin B10	319	20	0	85.55	2	F:GO:0005509; F:GO:0005544	F:calcium ion binding; F:calcium-dependent phospholipid binding			IPR001464 (PRINTS); IPR018502 (SMART); IPR037104 (G3DSA:1.10.220.GENE3D); IPR037104 (G3DSA:1.10.220.GENE3D); IPR037104 (G3DSA:1.10.220.GENE3D); IPR018502 (PFAM); PTHR10502 (PANTHER); PTHR10502:SF173 (PANTHER); SSF47874 (SUPERFAMILY)	F:GO:0005509; F:GO:0005544	F:calcium ion binding; F:calcium-dependent phospholipid binding
GMOY001369-PA	ubiquitin-like modifier-activating enzyme 1	1181	20	0	86	20	P:GO:0008283; P:GO:0019915; P:GO:0016319; P:GO:0035096; P:GO:0000209; P:GO:0008340; P:GO:0046578; P:GO:0043067; P:GO:0040008; C:GO:0005886; C:GO:0030425; F:GO:0005524; P:GO:0031987; P:GO:0010906; P:GO:0006914; P:GO:0030707; F:GO:0004839; F:GO:0016881; P:GO:0016322; F:GO:0019779	P:cell proliferation; P:lipid storage; P:mushroom body development; P:larval midgut cell programmed cell death; P:protein polyubiquitination; P:determination of adult lifespan; P:regulation of Ras protein signal transduction; P:regulation of programmed cell death; P:regulation of growth; C:plasma membrane; C:dendrite; F:ATP binding; P:locomotion involved in locomotory behavior; P:regulation of gl…			IPR000011 (PRINTS); IPR018965 (SMART); IPR032418 (PFAM); IPR000594 (PFAM); IPR018075 (TIGRFAM); IPR032420 (PFAM); IPR019572 (PFAM); IPR018965 (PFAM); G3DSA:3.40.50.720 (GENE3D); mobidb-lite (MOBIDB_LITE); mobidb-lite (MOBIDB_LITE); mobidb-lite (MOBIDB_LITE); PTHR10953 (PANTHER); PTHR10953:SF144 (PANTHER); cd01490 (CDD); cd01491 (CDD); IPR035985 (SUPERFAMILY); IPR035985 (SUPERFAMILY)	P:GO:0006464; F:GO:0008641	P:cellular protein modification process; F:small protein activating enzyme activity
GMOY001282-PA	calbindin-32 isoform X2	219	20	3.36052e-97	81.5	4	C:GO:0097467; C:GO:0061175; F:GO:0005509; P:GO:1903035	C:type III terminal bouton; C:type II terminal bouton; F:calcium ion binding; P:negative regulation of response to wounding			IPR002048 (SMART); G3DSA:1.10.238.10 (GENE3D); G3DSA:1.10.238.10 (GENE3D); IPR002048 (PFAM); G3DSA:1.10.238.10 (GENE3D); IPR002048 (PFAM); PTHR19972 (PANTHER); PTHR19972:SF10 (PANTHER); PTHR19972:SF10 (PANTHER); IPR002048 (PROSITE_PROFILES); IPR002048 (PROSITE_PROFILES); IPR011992 (SUPERFAMILY)	F:GO:0005509	F:calcium ion binding
GMOY011561-PA	40S ribosomal S7	193	20	1.37449e-139	97.9	7	C:GO:0005634; F:GO:0003723; F:GO:0003735; C:GO:0022627; P:GO:0002181; P:GO:0032543; C:GO:0005763	C:nucleus; F:RNA binding; F:structural constituent of ribosome; C:cytosolic small ribosomal subunit; P:cytoplasmic translation; P:mitochondrial translation; C:mitochondrial small ribosomal subunit			IPR000554 (PFAM); PTHR11278:SF0 (PANTHER); IPR000554 (PANTHER)	F:GO:0003735; C:GO:0005840; C:GO:0005622; P:GO:0006412	F:structural constituent of ribosome; C:ribosome; C:intracellular; P:translation
GMOY005839-PA	probable disulfide-isomerase A6	432	20	0	84.7	6	C:GO:0005811; P:GO:2000427; F:GO:0003756; C:GO:0005783; P:GO:0030431; P:GO:0045454	C:lipid particle; P:positive regulation of apoptotic cell clearance; F:protein disulfide isomerase activity; C:endoplasmic reticulum; P:sleep; P:cell redox homeostasis	EC:5.3.4.1	Protein disulfide-isomerase	PR00421 (PRINTS); G3DSA:3.40.30.10 (GENE3D); G3DSA:3.40.30.10 (GENE3D); IPR005788 (TIGRFAM); IPR013766 (PFAM); G3DSA:3.40.30.10 (GENE3D); PTHR18929 (PANTHER); PTHR18929:SF65 (PANTHER); IPR013766 (PROSITE_PROFILES); IPR013766 (PROSITE_PROFILES); cd02983 (CDD); cd03001 (CDD); cd03001 (CDD); IPR036249 (SUPERFAMILY); IPR036249 (SUPERFAMILY); IPR036249 (SUPERFAMILY)	P:GO:0045454; F:GO:0016853	P:cell redox homeostasis; F:isomerase activity
GMOY001013-PA	5NUC	616	20	0	79.65	5	F:GO:0000166; F:GO:0016788; F:GO:0046872; P:GO:0009166; C:GO:0016021	F:nucleotide binding; F:hydrolase activity, acting on ester bonds; F:metal ion binding; P:nucleotide catabolic process; C:integral component of membrane			IPR006179 (PRINTS); IPR008334 (PFAM); IPR029052 (G3DSA:3.60.21.GENE3D); IPR004843 (PFAM); IPR036907 (G3DSA:3.90.780.GENE3D); IPR006179 (PANTHER); PTHR11575:SF25 (PANTHER); cd07409 (CDD); IPR029052 (SUPERFAMILY); IPR036907 (SUPERFAMILY)	P:GO:0009166; F:GO:0016787	P:nucleotide catabolic process; F:hydrolase activity
GMOY009129-PA	T-complex 1 subunit theta	552	20	0	90.5	8	F:GO:0005524; C:GO:0005737; P:GO:0007052; F:GO:0051082; P:GO:0031122; P:GO:0006457; C:GO:0005875; C:GO:0005886	F:ATP binding; C:cytoplasm; P:mitotic spindle organization; F:unfolded protein binding; P:cytoplasmic microtubule organization; P:protein folding; C:microtubule associated complex; C:plasma membrane			IPR017998 (PRINTS); IPR027409 (G3DSA:3.50.7.GENE3D); IPR002423 (PFAM); IPR027413 (G3DSA:1.10.560.GENE3D); IPR012721 (TIGRFAM); IPR027413 (G3DSA:1.10.560.GENE3D); IPR002423 (PANTHER); PTHR11353:SF78 (PANTHER); IPR012721 (CDD); IPR027409 (SUPERFAMILY); IPR027413 (SUPERFAMILY); IPR037290 (SUPERFAMILY)	F:GO:0005524; F:GO:0051082; P:GO:0006457	F:ATP binding; F:unfolded protein binding; P:protein folding
GMOY005114-PA	adenylyl cyclase-associated 1 isoform X2	603	20	0	83.55	3	F:GO:0003779; P:GO:0000902; P:GO:0007015	F:actin binding; P:cell morphogenesis; P:actin filament organization			IPR006599 (SMART); IPR013912 (PFAM); G3DSA:2.160.20.70 (GENE3D); IPR013992 (PFAM); mobidb-lite (MOBIDB_LITE); IPR001837 (PANTHER); IPR017901 (PROSITE_PROFILES); IPR036222 (SUPERFAMILY); IPR036223 (SUPERFAMILY)	P:GO:0007010; F:GO:0003779	P:cytoskeleton organization; F:actin binding
GMOY007990-PA	Glycogen phosphorylase	783	20	0	94.75	10	F:GO:0008184; F:GO:0030170; F:GO:0042803; P:GO:0050829; P:GO:0008340; P:GO:0060361; P:GO:0045819; C:GO:0043234; P:GO:0005980; P:GO:0045824	F:glycogen phosphorylase activity; F:pyridoxal phosphate binding; F:protein homodimerization activity; P:defense response to Gram-negative bacterium; P:determination of adult lifespan; P:flight; P:positive regulation of glycogen catabolic process; C:protein complex; P:glycogen catabolic process; P:negative regulation of innate immune response	EC:2.4.1.1	Glycogen phosphorylase	IPR011833 (TIGRFAM); IPR000811 (PFAM); IPR000811 (PIRSF); G3DSA:3.40.50.2000 (GENE3D); G3DSA:3.40.50.2000 (GENE3D); IPR000811 (PANTHER); PTHR11468:SF26 (PANTHER); IPR011833 (CDD); SSF53756 (SUPERFAMILY)	F:GO:0004645; F:GO:0008184; P:GO:0005975; F:GO:0030170	F:phosphorylase activity; F:glycogen phosphorylase activity; P:carbohydrate metabolic process; F:pyridoxal phosphate binding
GMOY006255-PA	60S ribosomal L4	405	20	0	95.75	7	F:GO:0003735; P:GO:0051298; P:GO:0002181; P:GO:0019233; P:GO:0032543; C:GO:0022625; C:GO:0005762	F:structural constituent of ribosome; P:centrosome duplication; P:cytoplasmic translation; P:sensory perception of pain; P:mitochondrial translation; C:cytosolic large ribosomal subunit; C:mitochondrial large ribosomal subunit			IPR023574 (G3DSA:3.40.1370.GENE3D); IPR002136 (PFAM); IPR025755 (PFAM); PTHR19431:SF0 (PANTHER); PTHR19431 (PANTHER); IPR023574 (SUPERFAMILY)	F:GO:0003735; C:GO:0005840; P:GO:0006412	F:structural constituent of ribosome; C:ribosome; P:translation
GMOY007748-PA	coatomer subunit beta	952	20	0	93.1	9	P:GO:0045089; P:GO:0050829; P:GO:0000902; F:GO:0005198; P:GO:0006909; C:GO:0000139; P:GO:0006886; C:GO:0030126; P:GO:0010883	P:positive regulation of innate immune response; P:defense response to Gram-negative bacterium; P:cell morphogenesis; F:structural molecule activity; P:phagocytosis; C:Golgi membrane; P:intracellular protein transport; C:COPI vesicle coat; P:regulation of lipid storage			G3DSA:3.30.310.10 (GENE3D); IPR016460 (PIRSF); IPR002553 (PFAM); IPR029446 (PFAM); IPR011710 (PFAM); IPR011989 (G3DSA:1.25.10.GENE3D); mobidb-lite (MOBIDB_LITE); IPR016460 (PANTHER); IPR016024 (SUPERFAMILY)	C:GO:0030117; P:GO:0016192; C:GO:0005737; F:GO:0005198; P:GO:0006886; F:GO:0005488; C:GO:0030126	C:membrane coat; P:vesicle-mediated transport; C:cytoplasm; F:structural molecule activity; P:intracellular protein transport; F:binding; C:COPI vesicle coat
GMOY013247-PA	calreticulin	406	20	0	88.9	15	P:GO:0007476; P:GO:0007422; C:GO:0005783; F:GO:0051082; P:GO:0022008; P:GO:0048854; C:GO:0045169; P:GO:0006457; P:GO:0042048; C:GO:0005811; C:GO:0005615; P:GO:0031987; P:GO:0001964; F:GO:0005509; P:GO:0030431	P:imaginal disc-derived wing morphogenesis; P:peripheral nervous system development; C:endoplasmic reticulum; F:unfolded protein binding; P:neurogenesis; P:brain morphogenesis; C:fusome; P:protein folding; P:olfactory behavior; C:lipid particle; C:extracellular space; P:locomotion involved in locomotory behavior; P:startle response; F:calcium ion binding; P:sleep			IPR001580 (PRINTS); IPR009169 (PIRSF); IPR001580 (PFAM); G3DSA:2.60.120.200 (GENE3D); mobidb-lite (MOBIDB_LITE); mobidb-lite (MOBIDB_LITE); PTHR11073:SF16 (PANTHER); IPR001580 (PANTHER); IPR013320 (SUPERFAMILY); IPR009033 (SUPERFAMILY)	F:GO:0005515; F:GO:0005509; F:GO:0051082; C:GO:0005783; P:GO:0006457	F:protein binding; F:calcium ion binding; F:unfolded protein binding; C:endoplasmic reticulum; P:protein folding
GMOY003217-PA	proliferation-associated 2G4	639	20	0	90.85						IPR004545 (TIGRFAM); IPR000086 (PFAM); G3DSA:3.90.79.10 (GENE3D); IPR000994 (PFAM); G3DSA:3.90.230.10 (GENE3D); mobidb-lite (MOBIDB_LITE); PTHR10804:SF83 (PANTHER); PTHR10804 (PANTHER); IPR000086 (PROSITE_PROFILES); cd01089 (CDD); IPR036390 (SUPERFAMILY); IPR015797 (SUPERFAMILY); IPR036005 (SUPERFAMILY)	F:GO:0016787	F:hydrolase activity
GMOY003822-PA	T-complex 1 subunit epsilon	480	20	0	96.35	7	C:GO:0005832; F:GO:0005524; F:GO:0051082; P:GO:0022008; P:GO:0006457; C:GO:0005875; F:GO:0042623	C:chaperonin-containing T-complex; F:ATP binding; F:unfolded protein binding; P:neurogenesis; P:protein folding; C:microtubule associated complex; F:ATPase activity, coupled	EC:3.6.1.3; EC:3.6.1.15	Adenosinetriphosphatase; Nucleoside-triphosphate phosphatase	IPR017998 (PRINTS); IPR027413 (G3DSA:1.10.560.GENE3D); IPR027413 (G3DSA:1.10.560.GENE3D); IPR012718 (TIGRFAM); IPR027409 (G3DSA:3.50.7.GENE3D); IPR002423 (PFAM); IPR002423 (PANTHER); IPR012718 (PTHR11353:PANTHER); IPR012718 (CDD); IPR037290 (SUPERFAMILY); IPR027413 (SUPERFAMILY); IPR027409 (SUPERFAMILY)	F:GO:0005524; F:GO:0051082; P:GO:0006457	F:ATP binding; F:unfolded protein binding; P:protein folding
GMOY010079-PA	clathrin heavy chain	1690	20	0	97.1	5	P:GO:0016192; C:GO:0030130; C:GO:0030132; F:GO:0005198; P:GO:0006886	P:vesicle-mediated transport; C:clathrin coat of trans-Golgi network vesicle; C:clathrin coat of coated pit; F:structural molecule activity; P:intracellular protein transport			IPR000547 (SMART); IPR022365 (PFAM); G3DSA:2.130.10.110 (GENE3D); PF13838 (PFAM); IPR015348 (PFAM); IPR000547 (PFAM); IPR011990 (G3DSA:1.25.40.GENE3D); IPR012331 (G3DSA:1.25.40.GENE3D); IPR016341 (PIRSF); PTHR10292 (PANTHER); PTHR10292:SF7 (PANTHER); IPR000547 (PROSITE_PROFILES); IPR000547 (PROSITE_PROFILES); IPR000547 (PROSITE_PROFILES); IPR000547 (PROSITE_PROFILES); IPR000547 (PROSITE_PROFILES)…	F:GO:0032051; P:GO:0016192; F:GO:0005515; P:GO:0048268; C:GO:0030130; C:GO:0030132; F:GO:0005198; P:GO:0006886; C:GO:0071439; F:GO:0005488	F:clathrin light chain binding; P:vesicle-mediated transport; F:protein binding; P:clathrin coat assembly; C:clathrin coat of trans-Golgi network vesicle; C:clathrin coat of coated pit; F:structural molecule activity; P:intracellular protein transport; C:clathrin complex; F:binding
GMOY009118-PA	pleckstrin homology domain-containing family M member 1 isoform X1	945	20	0	68.95	1	F:GO:0008270	F:zinc ion binding			IPR025258 (SMART); IPR004012 (SMART); IPR014730 (SMART); IPR029035 (G3DSA:3.40.50.GENE3D); IPR014730 (PFAM); IPR004012 (PFAM); IPR014729 (G3DSA:3.40.50.GENE3D); IPR025258 (PFAM); IPR014731 (PFAM); mobidb-lite (MOBIDB_LITE); mobidb-lite (MOBIDB_LITE); PTHR12326 (PANTHER); PTHR12326:SF12 (PANTHER); PTHR12326 (PANTHER); PTHR12326:SF12 (PANTHER); IPR004012 (PROSITE_PROFILES); IPR033947 (CDD); IPR0290…	no GO terms	no GO terms
GMOY000487-PA	probable GDP-L-fucose synthase	321	20	0	85.9	4	F:GO:0050662; P:GO:0042350; P:GO:0055114; F:GO:0050577	F:coenzyme binding; P:GDP-L-fucose biosynthetic process; P:oxidation-reduction process; F:GDP-L-fucose synthase activity	EC:1.1.1.271	GDP-L-fucose synthase	G3DSA:3.40.50.720 (GENE3D); G3DSA:3.90.25.10 (GENE3D); G3DSA:3.40.50.720 (GENE3D); IPR001509 (PFAM); PTHR43238 (PANTHER); PTHR43238:SF1 (PANTHER); IPR028614 (HAMAP); IPR028614 (CDD); IPR036291 (SUPERFAMILY)	F:GO:0050662; F:GO:0003824; F:GO:0016491; P:GO:0009226	F:coenzyme binding; F:catalytic activity; F:oxidoreductase activity; P:nucleotide-sugar biosynthetic process
GMOY004743-PA	trifunctional enzyme subunit mitochondrial	767	20	0	86.7	10	C:GO:0005811; C:GO:0005777; P:GO:0006635; P:GO:0042060; C:GO:0016507; P:GO:0008340; F:GO:0016509; P:GO:0042594; F:GO:0004300; C:GO:0005875	C:lipid particle; C:peroxisome; P:fatty acid beta-oxidation; P:wound healing; C:mitochondrial fatty acid beta-oxidation multienzyme complex; P:determination of adult lifespan; F:long-chain-3-hydroxyacyl-CoA dehydrogenase activity; P:response to starvation; F:enoyl-CoA hydratase activity; C:microtubule associated complex	EC:1.1.1.35; EC:1.1.1.211; EC:4.2.1.17	3-hydroxyacyl-CoA dehydrogenase; Long-chain-3-hydroxyacyl-CoA dehydrogenase; Enoyl-CoA hydratase	IPR012803 (TIGRFAM); IPR013328 (G3DSA:1.10.1040.GENE3D); IPR006176 (PFAM); IPR001753 (PFAM); IPR006108 (PFAM); IPR013328 (G3DSA:1.10.1040.GENE3D); G3DSA:3.40.50.720 (GENE3D); G3DSA:3.90.226.10 (GENE3D); PTHR43612 (PANTHER); PTHR43612:SF3 (PANTHER); cd06558 (CDD); IPR029045 (SUPERFAMILY); IPR036291 (SUPERFAMILY); IPR008927 (SUPERFAMILY); IPR008927 (SUPERFAMILY)	P:GO:0006635; F:GO:0003857; C:GO:0016507; F:GO:0016491; F:GO:0003824; C:GO:0005739; P:GO:0008152; P:GO:0055114; F:GO:0004300; P:GO:0006631	P:fatty acid beta-oxidation; F:3-hydroxyacyl-CoA dehydrogenase activity; C:mitochondrial fatty acid beta-oxidation multienzyme complex; F:oxidoreductase activity; F:catalytic activity; C:mitochondrion; P:metabolic process; P:oxidation-reduction process; F:enoyl-CoA hydratase activity; P:fatty acid metabolic process
GMOY003179-PA	dipeptidyl peptidase 3 isoform X1	789	20	0	89.15	4	C:GO:0005737; F:GO:0046872; P:GO:0006508; F:GO:0008239	C:cytoplasm; F:metal ion binding; P:proteolysis; F:dipeptidyl-peptidase activity	EC:3.4.11	Acting on peptide bonds (peptidases)	IPR005317 (PIRSF); PF03571 (PFAM); PTHR23422 (PANTHER); PTHR23422:SF11 (PANTHER)	C:GO:0005737; P:GO:0006508; F:GO:0008239	C:cytoplasm; P:proteolysis; F:dipeptidyl-peptidase activity
GMOY011744-PA	ADP-ribosylation factor 2	180	20	1.10179e-121	95.5	9	F:GO:0005525; P:GO:0006471; F:GO:0003956; P:GO:0007264; P:GO:0048488; P:GO:0016197; P:GO:0048749; C:GO:0005622; P:GO:0007269	F:GTP binding; P:protein ADP-ribosylation; F:NAD(P)+-protein-arginine ADP-ribosyltransferase activity; P:small GTPase mediated signal transduction; P:synaptic vesicle endocytosis; P:endosomal transport; P:compound eye development; C:intracellular; P:neurotransmitter secretion	EC:2.4.2.31	NAD(+)--protein-arginine ADP-ribosyltransferase	IPR006689 (PRINTS); SM00177 (SMART); SM00175 (SMART); SM00178 (SMART); G3DSA:3.40.50.300 (GENE3D); IPR005225 (TIGRFAM); IPR006689 (PFAM); PTHR11711:SF182 (PANTHER); PTHR11711 (PANTHER); IPR024156 (PROSITE_PROFILES); cd04150 (CDD); IPR027417 (SUPERFAMILY)	F:GO:0005525; P:GO:0007264; C:GO:0005622	F:GTP binding; P:small GTPase mediated signal transduction; C:intracellular
GMOY005635-PA	tryptophan--tRNA cytoplasmic	430	20	0	89.6	5	F:GO:0005524; C:GO:0005737; P:GO:0006436; F:GO:0004830; P:GO:0048813	F:ATP binding; C:cytoplasm; P:tryptophanyl-tRNA aminoacylation; F:tryptophan-tRNA ligase activity; P:dendrite morphogenesis	EC:6.1.1.2	Tryptophan--tRNA ligase	IPR002306 (PRINTS); IPR002306 (TIGRFAM); IPR014729 (G3DSA:3.40.50.GENE3D); IPR002305 (PFAM); G3DSA:1.10.240.10 (GENE3D); PTHR10055 (PANTHER); PTHR10055:SF1 (PANTHER); IPR002306 (CDD); SSF52374 (SUPERFAMILY)	F:GO:0000166; F:GO:0005524; P:GO:0006418; F:GO:0004812; C:GO:0005737; P:GO:0006436; F:GO:0004830	F:nucleotide binding; F:ATP binding; P:tRNA aminoacylation for protein translation; F:aminoacyl-tRNA ligase activity; C:cytoplasm; P:tryptophanyl-tRNA aminoacylation; F:tryptophan-tRNA ligase activity
GMOY010190-PA	melanotransferrin	1810	20	0	85.55	9	C:GO:0005769; F:GO:0005506; P:GO:0019991; C:GO:0005918; C:GO:0016021; C:GO:0005829; C:GO:0055037; C:GO:0005576; C:GO:0046658	C:early endosome; F:iron ion binding; P:septate junction assembly; C:septate junction; C:integral component of membrane; C:cytosol; C:recycling endosome; C:extracellular region; C:anchored component of plasma membrane			IPR001156 (PRINTS); IPR001156 (SMART); G3DSA:3.40.120.10 (GENE3D); G3DSA:3.40.120.10 (GENE3D); IPR036900 (G3DSA:3.30.310.GENE3D); PF13418 (PFAM); G3DSA:3.40.190.10 (GENE3D); IPR005844 (PFAM); IPR037293 (G3DSA:2.130.10.GENE3D); IPR001156 (PFAM); G3DSA:3.40.190.10 (GENE3D); IPR005843 (PFAM); IPR015915 (G3DSA:2.120.10.GENE3D); G3DSA:3.40.120.10 (GENE3D); G3DSA:3.40.190.10 (GENE3D); PF13415 (PFAM); G…	P:GO:0005975; F:GO:0016868; F:GO:0005515; P:GO:0071704; F:GO:0004610	P:carbohydrate metabolic process; F:intramolecular transferase activity, phosphotransferases; F:protein binding; P:organic substance metabolic process; F:phosphoacetylglucosamine mutase activity
GMOY008065-PA	myristoylated alanine-rich C-kinase substrate	174	9	7.86542e-14	79.44						mobidb-lite (MOBIDB_LITE)	no GO terms	no GO terms
GMOY003266-PA	translocating chain-associated membrane 1	764	20	0	85.05	5	C:GO:0005811; P:GO:0015031; C:GO:0016021; P:GO:0006909; P:GO:0019233	C:lipid particle; P:protein transport; C:integral component of membrane; P:phagocytosis; P:sensory perception of pain			IPR006634 (SMART); IPR006634 (PFAM); IPR013599 (PFAM); mobidb-lite (MOBIDB_LITE); mobidb-lite (MOBIDB_LITE); PTHR12371 (PANTHER); PTHR12371:SF11 (PANTHER); IPR006634 (PROSITE_PROFILES)	C:GO:0016021	C:integral component of membrane
GMOY000979-PA	60S acidic ribosomal P0	312	20	0	96.95	4	F:GO:0003735; P:GO:0002181; P:GO:0042254; C:GO:0022625	F:structural constituent of ribosome; P:cytoplasmic translation; P:ribosome biogenesis; C:cytosolic large ribosomal subunit			IPR001790 (PFAM); IPR030670 (PIRSF); PF00428 (PFAM); mobidb-lite (MOBIDB_LITE); PTHR21141 (PANTHER); PTHR21141:SF3 (PANTHER); cd05795 (CDD); SSF160369 (SUPERFAMILY)	P:GO:0042254; C:GO:0005622	P:ribosome biogenesis; C:intracellular
GMOY010807-PA	Kinesin heavy chain	958	20	0	92.65	5	F:GO:0005524; F:GO:0003777; P:GO:0007018; C:GO:0005874; F:GO:0008017	F:ATP binding; F:microtubule motor activity; P:microtubule-based movement; C:microtubule; F:microtubule binding	EC:3.6.1.15	Nucleoside-triphosphate phosphatase	IPR001752 (PRINTS); IPR001752 (SMART); G3DSA:1.20.5.730 (GENE3D); G3DSA:1.20.5.170 (GENE3D); G3DSA:1.20.5.400 (GENE3D); IPR001752 (PFAM); G3DSA:1.20.120.330 (GENE3D); IPR036961 (G3DSA:3.40.850.GENE3D); PTHR24115:SF317 (PANTHER); IPR027640 (PANTHER); IPR001752 (PROSITE_PROFILES); cd01369 (CDD); IPR027417 (SUPERFAMILY)	F:GO:0005524; F:GO:0003777; P:GO:0007018; F:GO:0008017	F:ATP binding; F:microtubule motor activity; P:microtubule-based movement; F:microtubule binding
GMOY001984-PA	threonine--tRNA cytoplasmic isoform X1	756	20	0	94.45	4	F:GO:0005524; C:GO:0005737; F:GO:0004829; P:GO:0006435	F:ATP binding; C:cytoplasm; F:threonine-tRNA ligase activity; P:threonyl-tRNA aminoacylation	EC:6.1.1.3	Threonine--tRNA ligase	IPR002320 (PRINTS); IPR012947 (SMART); IPR012675 (G3DSA:3.10.20.GENE3D); IPR004095 (PFAM); IPR002320 (TIGRFAM); IPR036621 (G3DSA:3.40.50.GENE3D); IPR004154 (PFAM); IPR012947 (PFAM); G3DSA:3.30.980.10 (GENE3D); G3DSA:3.30.930.10 (GENE3D); IPR002314 (PFAM); IPR002320 (PANTHER); PTHR11451:SF36 (PANTHER); IPR006195 (PROSITE_PROFILES); IPR002320 (HAMAP); cd00860 (CDD); cd01667 (CDD); IPR033728 (CDD); …	F:GO:0016876; F:GO:0000166; F:GO:0005524; P:GO:0006418; F:GO:0004812; C:GO:0005737; F:GO:0004829; P:GO:0006435; P:GO:0043039	F:ligase activity, forming aminoacyl-tRNA and related compounds; F:nucleotide binding; F:ATP binding; P:tRNA aminoacylation for protein translation; F:aminoacyl-tRNA ligase activity; C:cytoplasm; F:threonine-tRNA ligase activity; P:threonyl-tRNA aminoacylation; P:tRNA aminoacylation
GMOY003358-PA	complement component 1 Q subcomponent-binding mitochondrial	264	20	8.8403e-142	80.8	1	C:GO:0005759	C:mitochondrial matrix			IPR036561 (G3DSA:3.10.280.GENE3D); IPR003428 (PFAM); PTHR10826:SF1 (PANTHER); IPR003428 (PANTHER); IPR036561 (SUPERFAMILY)	C:GO:0005759	C:mitochondrial matrix
GMOY007807-PA	heat shock 23	207	20	2.55556e-104	83.45						IPR001436 (PRINTS); IPR008978 (G3DSA:2.60.40.GENE3D); IPR002068 (PFAM); mobidb-lite (MOBIDB_LITE); IPR031107 (PANTHER); PTHR11527:SF114 (PANTHER); IPR002068 (PROSITE_PROFILES); cd06526 (CDD); IPR008978 (SUPERFAMILY)	no GO terms	no GO terms
GMOY004149-PA	catalase	505	20	0	91.55	7	P:GO:0006979; F:GO:0046872; F:GO:0004096; P:GO:0098869; P:GO:0055114; F:GO:0020037; P:GO:0042744	P:response to oxidative stress; F:metal ion binding; F:catalase activity; P:cellular oxidant detoxification; P:oxidation-reduction process; F:heme binding; P:hydrogen peroxide catabolic process	EC:1.11.1.7; EC:1.11.1.6	Peroxidase; Catalase	IPR018028 (PRINTS); IPR011614 (SMART); IPR037060 (G3DSA:2.40.180.GENE3D); IPR024711 (PIRSF); IPR010582 (PFAM); IPR011614 (PFAM); PTHR11465:SF9 (PANTHER); IPR018028 (PANTHER); IPR018028 (PROSITE_PROFILES); cd08156 (CDD); IPR020835 (SUPERFAMILY)	P:GO:0006979; F:GO:0004096; P:GO:0055114; F:GO:0020037	P:response to oxidative stress; F:catalase activity; P:oxidation-reduction process; F:heme binding
GMOY002660-PA	chloride intracellular channel exc-4	248	20	4.58706e-162	98.75	1	F:GO:0016740	F:transferase activity			G3DSA:1.20.1050.10 (GENE3D); G3DSA:3.40.30.10 (GENE3D); PTHR43920:SF5 (PANTHER); PTHR43920 (PANTHER); cd03061 (CDD); cd03198 (CDD); IPR036282 (SUPERFAMILY); IPR036249 (SUPERFAMILY)	no GO terms	no GO terms
GMOY003934-PB	probable aconitate mitochondrial	785	20	0	91.05	6	C:GO:0005811; F:GO:0046872; C:GO:0005739; P:GO:0006099; F:GO:0051539; F:GO:0003994	C:lipid particle; F:metal ion binding; C:mitochondrion; P:tricarboxylic acid cycle; F:4 iron, 4 sulfur cluster binding; F:aconitate hydratase activity	EC:4.2.1.3	Aconitate hydratase	IPR001030 (PRINTS); IPR015928 (G3DSA:3.20.19.GENE3D); IPR006248 (TIGRFAM); IPR000573 (PFAM); IPR015931 (G3DSA:3.30.499.GENE3D); IPR015932 (G3DSA:3.40.1060.GENE3D); IPR001030 (PFAM); IPR015931 (G3DSA:3.30.499.GENE3D); PTHR43160 (PANTHER); PTHR43160:SF3 (PANTHER); cd01578 (CDD); cd01584 (CDD); IPR036008 (SUPERFAMILY); SSF52016 (SUPERFAMILY)	P:GO:0008152; P:GO:0006099; F:GO:0051539; F:GO:0003994	P:metabolic process; P:tricarboxylic acid cycle; F:4 iron, 4 sulfur cluster binding; F:aconitate hydratase activity
GMOY010851-PA	heat shock 70 kDa cognate 5	701	20	0	93.5	9	C:GO:0005811; F:GO:0005524; P:GO:0010918; P:GO:0070584; C:GO:0005739; F:GO:0051082; P:GO:0006457; P:GO:0000422; C:GO:0005875	C:lipid particle; F:ATP binding; P:positive regulation of mitochondrial membrane potential; P:mitochondrion morphogenesis; C:mitochondrion; F:unfolded protein binding; P:protein folding; P:mitophagy; C:microtubule associated complex			IPR013126 (PRINTS); G3DSA:3.30.420.40 (GENE3D); IPR029047 (G3DSA:2.60.34.GENE3D); G3DSA:3.30.420.40 (GENE3D); G3DSA:3.30.420.40 (GENE3D); IPR012725 (TIGRFAM); IPR029048 (G3DSA:1.20.1270.GENE3D); IPR013126 (PFAM); mobidb-lite (MOBIDB_LITE); PTHR19375 (PANTHER); PTHR19375:SF333 (PANTHER); IPR012725 (HAMAP); cd11733 (CDD); SSF53067 (SUPERFAMILY); IPR029047 (SUPERFAMILY); SSF53067 (SUPERFAMILY)	F:GO:0005524; F:GO:0051082; P:GO:0006457	F:ATP binding; F:unfolded protein binding; P:protein folding
GMOY001239-PA	Gmfb8	216	1	1.28393e-07	51						no IPS match	no IPS match	no IPS match
GMOY000886-PA	actin-interacting 1	609	20	0	94	7	F:GO:0003779; P:GO:0030042; P:GO:0006909; P:GO:0045214; P:GO:0035317; P:GO:0007298; P:GO:0034316	F:actin binding; P:actin filament depolymerization; P:phagocytosis; P:sarcomere organization; P:imaginal disc-derived wing hair organization; P:border follicle cell migration; P:negative regulation of Arp2/3 complex-mediated actin nucleation			IPR020472 (PRINTS); IPR001680 (SMART); IPR015943 (G3DSA:2.130.10.GENE3D); IPR001680 (PFAM); IPR015943 (G3DSA:2.130.10.GENE3D); IPR013979 (PFAM); IPR015943 (G3DSA:2.130.10.GENE3D); PTHR19856 (PANTHER); IPR001680 (PROSITE_PROFILES); IPR001680 (PROSITE_PROFILES); IPR001680 (PROSITE_PROFILES); IPR017986 (PROSITE_PROFILES); IPR001680 (PROSITE_PROFILES); IPR001680 (PROSITE_PROFILES); cd00200 (CDD); IPR…	F:GO:0005515	F:protein binding
GMOY001901-PA	microfibril-associated glyco 4-like	349	20	3.93142e-64	56.6						IPR002181 (SMART); IPR002181 (PFAM); IPR014716 (G3DSA:3.90.215.GENE3D); IPR014715 (G3DSA:4.10.530.GENE3D); PTHR19143 (PANTHER); PTHR19143:SF330 (PANTHER); IPR002181 (PROSITE_PROFILES); IPR002181 (CDD); IPR036056 (SUPERFAMILY)	no GO terms	no GO terms
GMOY008925-PA	glutamate synthase [NADH] amyloplastic isoform X1	2127	20	0	89.1	7	P:GO:0006537; F:GO:0010181; F:GO:0005506; F:GO:0016040; F:GO:0050660; P:GO:0055114; F:GO:0051536	P:glutamate biosynthetic process; F:FMN binding; F:iron ion binding; F:glutamate synthase (NADH) activity; F:flavin adenine dinucleotide binding; P:oxidation-reduction process; F:iron-sulfur cluster binding	EC:1.4.1.14	Glutamate synthase (NADH)	PR00419 (PRINTS); IPR023753 (PFAM); IPR012220 (PIRSF); IPR013785 (G3DSA:3.20.20.GENE3D); IPR002932 (PFAM); IPR009051 (G3DSA:1.10.1060.GENE3D); IPR036485 (G3DSA:2.160.20.GENE3D); IPR028261 (PFAM); IPR036188 (G3DSA:3.50.50.GENE3D); IPR029055 (G3DSA:3.60.20.GENE3D); IPR013785 (G3DSA:3.20.20.GENE3D); IPR006005 (TIGRFAM); IPR017932 (PFAM); IPR036188 (G3DSA:3.50.50.GENE3D); G3DSA:3.40.50.720 (GENE3D); …	F:GO:0010181; F:GO:0016638; F:GO:0016639; P:GO:0008152; P:GO:0006537; F:GO:0016491; F:GO:0050660; F:GO:0005506; F:GO:0016040; F:GO:0003824; P:GO:0006807; P:GO:0055114; F:GO:0051536; F:GO:0045181; F:GO:0015930	F:FMN binding; F:oxidoreductase activity, acting on the CH-NH2 group of donors; F:oxidoreductase activity, acting on the CH-NH2 group of donors, NAD or NADP as acceptor; P:metabolic process; P:glutamate biosynthetic process; F:oxidoreductase activity; F:flavin adenine dinucleotide binding; F:iron ion binding; F:glutamate synthase (NADH) activity; F:catalytic activity; P:nitrogen compound metaboli…
GMOY010772-PA	transcription factor BTF3 homolog 4	233	20	7.357e-87	90.1						IPR002715 (SMART); IPR002715 (PFAM); PTHR10351:SF23 (PANTHER); PTHR10351 (PANTHER); IPR002715 (PROSITE_PROFILES)	no GO terms	no GO terms
GMOY011554-PA	myosin regulatory light chain 2	249	20	1.01402e-93	96.7	6	P:GO:0030239; C:GO:0016459; F:GO:0005509; P:GO:0060361; P:GO:0003012; C:GO:0030016	P:myofibril assembly; C:myosin complex; F:calcium ion binding; P:flight; P:muscle system process; C:myofibril			IPR002048 (SMART); G3DSA:1.10.238.10 (GENE3D); G3DSA:1.10.238.10 (GENE3D); IPR002048 (PFAM); G3DSA:1.10.238.10 (GENE3D); G3DSA:1.10.238.10 (GENE3D); mobidb-lite (MOBIDB_LITE); PTHR23049 (PANTHER); PTHR23049:SF4 (PANTHER); IPR002048 (PROSITE_PROFILES); IPR002048 (PROSITE_PROFILES); IPR002048 (PROSITE_PROFILES); IPR002048 (CDD); IPR011992 (SUPERFAMILY)	F:GO:0005509	F:calcium ion binding
GMOY008057-PA	coatomer subunit beta	1292	20	0	94.55	4	C:GO:0030117; P:GO:0016192; F:GO:0005198; P:GO:0006886	C:membrane coat; P:vesicle-mediated transport; F:structural molecule activity; P:intracellular protein transport			IPR020472 (PRINTS); IPR001680 (SMART); IPR015943 (G3DSA:2.130.10.GENE3D); IPR007304 (PFAM); IPR006692 (PFAM); IPR036770 (G3DSA:1.25.40.GENE3D); G3DSA:1.10.10.670 (GENE3D); IPR011042 (G3DSA:2.120.10.GENE3D); IPR015943 (G3DSA:2.130.10.GENE3D); IPR001680 (PFAM); mobidb-lite (MOBIDB_LITE); PTHR19876:SF2 (PANTHER); PTHR19876 (PANTHER); IPR001680 (PROSITE_PROFILES); IPR001680 (PROSITE_PROFILES); IPR017…	C:GO:0030117; F:GO:0005515; P:GO:0016192; F:GO:0005198; P:GO:0006886; P:GO:0009966	C:membrane coat; F:protein binding; P:vesicle-mediated transport; F:structural molecule activity; P:intracellular protein transport; P:regulation of signal transduction
GMOY006418-PA	general odorant-binding 99a	140	20	3.90568e-104	80.75	1	F:GO:0005549	F:odorant binding			IPR006170 (SMART); IPR006170 (PFAM); IPR036728 (G3DSA:1.10.238.GENE3D); PTHR11857:SF2 (PANTHER); PTHR11857 (PANTHER); IPR036728 (SUPERFAMILY)	F:GO:0005549	F:odorant binding
GMOY001073-PA	PREDICTED: uncharacterized protein LOC101900104 isoform X2	622	20	0	61.65	4	F:GO:0003824; P:GO:0008152; C:GO:0016020; C:GO:0016021	F:catalytic activity; P:metabolic process; C:membrane; C:integral component of membrane			G3DSA:1.10.238.10 (GENE3D); IPR004245 (PFAM); IPR017849 (G3DSA:3.40.720.GENE3D); IPR004245 (PANTHER); PTHR10974:SF9 (PANTHER); IPR002048 (PROSITE_PROFILES); IPR004245 (CDD); IPR011992 (SUPERFAMILY); IPR017850 (SUPERFAMILY)	F:GO:0003824; F:GO:0005509; P:GO:0008152	F:catalytic activity; F:calcium ion binding; P:metabolic process
GMOY011771-PA	probable methylmalonate-semialdehyde dehydrogenase [acylating] mitochondrial	379	20	0	92.1	2	F:GO:0004491; P:GO:0055114	F:methylmalonate-semialdehyde dehydrogenase (acylating) activity; P:oxidation-reduction process	EC:1.2.1.27	Methylmalonate-semialdehyde dehydrogenase (CoA acylating)	IPR010061 (TIGRFAM); IPR015590 (PFAM); G3DSA:3.40.309.10 (GENE3D); IPR016162 (G3DSA:3.40.605.GENE3D); PTHR43866:SF3 (PANTHER); IPR010061 (PANTHER); IPR010061 (CDD); IPR016161 (SUPERFAMILY)	F:GO:0016491; F:GO:0004491; P:GO:0008152; P:GO:0055114	F:oxidoreductase activity; F:methylmalonate-semialdehyde dehydrogenase (acylating) activity; P:metabolic process; P:oxidation-reduction process
GMOY009874-PA	T-complex 1 subunit eta	543	20	0	96.4	9	F:GO:0003677; F:GO:0005524; P:GO:0007052; C:GO:0005829; F:GO:0051082; P:GO:0022008; P:GO:0031122; P:GO:0006457; C:GO:0005875	F:DNA binding; F:ATP binding; P:mitotic spindle organization; C:cytosol; F:unfolded protein binding; P:neurogenesis; P:cytoplasmic microtubule organization; P:protein folding; C:microtubule associated complex			IPR017998 (PRINTS); IPR012720 (TIGRFAM); IPR027413 (G3DSA:1.10.560.GENE3D); IPR027409 (G3DSA:3.50.7.GENE3D); IPR027413 (G3DSA:1.10.560.GENE3D); IPR002423 (PFAM); mobidb-lite (MOBIDB_LITE); IPR002423 (PANTHER); IPR012720 (PTHR11353:PANTHER); IPR012720 (CDD); IPR027409 (SUPERFAMILY); IPR037290 (SUPERFAMILY); IPR027413 (SUPERFAMILY)	F:GO:0005524; F:GO:0051082; P:GO:0006457	F:ATP binding; F:unfolded protein binding; P:protein folding
GMOY010754-PA	Na(+) H(+) exchange regulatory cofactor NHE-RF1	275	20	3.69128e-69	74.3	4	C:GO:0045177; P:GO:0007476; P:GO:0042048; P:GO:0030036	C:apical part of cell; P:imaginal disc-derived wing morphogenesis; P:olfactory behavior; P:actin cytoskeleton organization			IPR001478 (SMART); IPR001478 (PFAM); G3DSA:2.30.42.10 (GENE3D); mobidb-lite (MOBIDB_LITE); PTHR14191 (PANTHER); IPR001478 (PROSITE_PROFILES); cd00992 (CDD); IPR036034 (SUPERFAMILY)	F:GO:0005515	F:protein binding
GMOY010979-PA	ras-related Rab-5B	222	20	7.26283e-136	97.75	31	P:GO:0016348; P:GO:0035088; P:GO:0035220; P:GO:0007293; P:GO:0008285; P:GO:0007298; C:GO:0043025; C:GO:0045202; P:GO:0006325; P:GO:0048813; F:GO:0005525; C:GO:0005769; P:GO:0048488; F:GO:0003924; P:GO:0030100; P:GO:0007220; P:GO:0032482; P:GO:0007067; P:GO:0046664; P:GO:0048227; P:GO:0007349; C:GO:0005886; P:GO:0048803; C:GO:0005811; F:GO:0005515; P:GO:0010906; P:GO:0048675; P:GO:0050803; P:GO:00…	P:imaginal disc-derived leg joint morphogenesis; P:establishment or maintenance of apical/basal cell polarity; P:wing disc development; P:germarium-derived egg chamber formation; P:negative regulation of cell proliferation; P:border follicle cell migration; C:neuronal cell body; C:synapse; P:chromatin organization; P:dendrite morphogenesis; F:GTP binding; C:early endosome; P:synaptic vesicle endo…	EC:3.6.1.15	Nucleoside-triphosphate phosphatase	PR00449 (PRINTS); SM00173 (SMART); SM00175 (SMART); SM00176 (SMART); SM00174 (SMART); IPR001806 (PFAM); IPR005225 (TIGRFAM); G3DSA:3.30.70.1390 (GENE3D); G3DSA:3.40.50.300 (GENE3D); mobidb-lite (MOBIDB_LITE); mobidb-lite (MOBIDB_LITE); PTHR24073:SF555 (PANTHER); PTHR24073 (PANTHER); PS51419 (PROSITE_PROFILES); cd01860 (CDD); IPR027417 (SUPERFAMILY)	F:GO:0005525; F:GO:0003924	F:GTP binding; F:GTPase activity
GMOY000946-PA	gamma-glutamyl hydrolase isoform X1	326	20	5.53394e-115	64.2	1	F:GO:0003824	F:catalytic activity			IPR029062 (G3DSA:3.40.50.GENE3D); IPR011697 (PFAM); IPR015527 (PANTHER); IPR015527 (PROSITE_PROFILES); IPR029062 (SUPERFAMILY)	F:GO:0008242; F:GO:0016787	F:omega peptidase activity; F:hydrolase activity
GMOY010249-PA	plastin-3 isoform X2	666	20	0	94.85	2	F:GO:0003779; F:GO:0005509	F:actin binding; F:calcium ion binding			IPR001715 (SMART); IPR002048 (SMART); IPR001715 (PFAM); IPR036872 (G3DSA:1.10.418.GENE3D); G3DSA:1.10.238.10 (GENE3D); IPR036872 (G3DSA:1.10.418.GENE3D); G3DSA:1.10.238.10 (GENE3D); IPR036872 (G3DSA:1.10.418.GENE3D); IPR036872 (G3DSA:1.10.418.GENE3D); IPR030235 (PTHR19961:PANTHER); PTHR19961 (PANTHER); IPR002048 (PROSITE_PROFILES); IPR001715 (PROSITE_PROFILES); IPR001715 (PROSITE_PROFILES); IPR00…	F:GO:0051015; F:GO:0005515; F:GO:0003779; F:GO:0005509	F:actin filament binding; F:protein binding; F:actin binding; F:calcium ion binding
GMOY004070-PA	60S ribosomal L14	167	20	4.79206e-96	93.45	5	F:GO:0003735; P:GO:0051298; P:GO:0002181; C:GO:0022625; P:GO:0043524	F:structural constituent of ribosome; P:centrosome duplication; P:cytoplasmic translation; C:cytosolic large ribosomal subunit; P:negative regulation of neuron apoptotic process			IPR014722 (G3DSA:2.30.30.GENE3D); IPR002784 (PFAM); PTHR11127 (PANTHER); cd06088 (CDD); IPR008991 (SUPERFAMILY)	F:GO:0003735; C:GO:0005840; C:GO:0005622; P:GO:0006412	F:structural constituent of ribosome; C:ribosome; C:intracellular; P:translation
GMOY008958-PA	endothelin-converting enzyme-like 1	676	20	4.69807e-171	53.6	4	P:GO:0006508; F:GO:0004222; F:GO:0008237; F:GO:0016787	P:proteolysis; F:metalloendopeptidase activity; F:metallopeptidase activity; F:hydrolase activity			IPR018497 (PRINTS); IPR008753 (PFAM); IPR024079 (G3DSA:3.40.390.GENE3D); IPR018497 (PFAM); IPR000718 (PANTHER); PTHR11733:SF184 (PANTHER); SSF55486 (SUPERFAMILY)	P:GO:0006508; F:GO:0004222; F:GO:0008237	P:proteolysis; F:metalloendopeptidase activity; F:metallopeptidase activity
GMOY009095-PA	homolog isoform X1	1734	20	0	85.2	5	C:GO:0005856; F:GO:0003779; C:GO:0005737; F:GO:0005198; C:GO:0019898	C:cytoskeleton; F:actin binding; C:cytoplasm; F:structural molecule activity; C:extrinsic component of membrane			IPR019749 (PRINTS); IPR000798 (PRINTS); IPR018980 (SMART); IPR019749 (SMART); IPR014847 (SMART); G3DSA:3.10.20.90 (GENE3D); IPR011993 (G3DSA:2.30.29.GENE3D); IPR018979 (PFAM); IPR014847 (PFAM); IPR008379 (PFAM); IPR014352 (G3DSA:1.20.80.GENE3D); IPR018980 (PFAM); IPR019748 (PFAM); mobidb-lite (MOBIDB_LITE); mobidb-lite (MOBIDB_LITE); mobidb-lite (MOBIDB_LITE); mobidb-lite (MOBIDB_LITE); mobidb-li…	C:GO:0005856; F:GO:0003779; F:GO:0005198; F:GO:0008092	C:cytoskeleton; F:actin binding; F:structural molecule activity; F:cytoskeletal protein binding
GMOY011451-PA	probable fatty acid-binding	132	20	8.08562e-65	91.1	4	C:GO:0016021; F:GO:0008289; P:GO:0006810; F:GO:0005215	C:integral component of membrane; F:lipid binding; P:transport; F:transporter activity			IPR000463 (PRINTS); IPR000566 (PFAM); IPR012674 (G3DSA:2.40.128.GENE3D); PTHR11955:SF92 (PANTHER); IPR031259 (PANTHER); IPR012674 (SUPERFAMILY)	F:GO:0008289; P:GO:0006810; F:GO:0005215	F:lipid binding; P:transport; F:transporter activity
GMOY011640-PA	isoform C	347	20	0	94.85	3	P:GO:0006904; P:GO:0015031; C:GO:0000145	P:vesicle docking involved in exocytosis; P:protein transport; C:exocyst			IPR004142 (PFAM); IPR029058 (G3DSA:3.40.50.GENE3D); IPR004142 (PANTHER); PTHR11034:SF40 (PANTHER); IPR029058 (SUPERFAMILY)	no GO terms	no GO terms
GMOY011232-PA	bifunctional 3 -phosphoadenosine 5 -phosphosulfate synthase isoform X3	641	20	0	90.8	7	F:GO:0005524; P:GO:0007476; F:GO:0004020; F:GO:0004781; P:GO:0016310; P:GO:0000103; C:GO:0005654	F:ATP binding; P:imaginal disc-derived wing morphogenesis; F:adenylylsulfate kinase activity; F:sulfate adenylyltransferase (ATP) activity; P:phosphorylation; P:sulfate assimilation; C:nucleoplasm	EC:2.7.7.4; EC:2.7.1.25	Sulfate adenylyltransferase; Adenylyl-sulfate kinase	G3DSA:3.10.400.10 (GENE3D); IPR002650 (TIGRFAM); IPR025980 (PFAM); PF01583 (PFAM); IPR014729 (G3DSA:3.40.50.GENE3D); IPR024951 (PFAM); G3DSA:3.40.50.300 (GENE3D); IPR002891 (TIGRFAM); PTHR11055:SF16 (PANTHER); PTHR11055 (PANTHER); IPR002891 (HAMAP); IPR002650 (CDD); IPR002891 (CDD); IPR015947 (SUPERFAMILY); IPR027417 (SUPERFAMILY); SSF52374 (SUPERFAMILY)	F:GO:0005524; F:GO:0004020; F:GO:0004781; P:GO:0000103	F:ATP binding; F:adenylylsulfate kinase activity; F:sulfate adenylyltransferase (ATP) activity; P:sulfate assimilation
GMOY009102-PA	12 kDa FK506-binding	108	20	7.79412e-73	98.75	5	F:GO:0003755; P:GO:0000413; P:GO:0006457; P:GO:0006974; C:GO:0005886	F:peptidyl-prolyl cis-trans isomerase activity; P:protein peptidyl-prolyl isomerization; P:protein folding; P:cellular response to DNA damage stimulus; C:plasma membrane	EC:5.2.1.8	Peptidylprolyl isomerase	IPR001179 (PFAM); G3DSA:3.10.50.40 (GENE3D); PTHR10516:SF301 (PANTHER); IPR023566 (PANTHER); IPR001179 (PROSITE_PROFILES); SSF54534 (SUPERFAMILY)	no GO terms	no GO terms
GMOY010882-PA	ejaculatory bulb-specific 3	128	20	6.38321e-76	85.5	4	P:GO:0045297; P:GO:0007552; C:GO:0005576; P:GO:0009615	P:post-mating behavior; P:metamorphosis; C:extracellular region; P:response to virus			IPR005055 (PFAM); IPR036682 (G3DSA:1.10.2080.GENE3D); PTHR11257:SF2 (PANTHER); IPR005055 (PANTHER); IPR036682 (SUPERFAMILY)	no GO terms	no GO terms
GMOY008696-PA	aspartate--tRNA cytoplasmic	663	20	0	89.55	9	F:GO:0003676; F:GO:0005524; C:GO:0005737; F:GO:0004815; C:GO:0017101; P:GO:0022008; C:GO:0005875; P:GO:0006422; P:GO:0040007	F:nucleic acid binding; F:ATP binding; C:cytoplasm; F:aspartate-tRNA ligase activity; C:aminoacyl-tRNA synthetase multienzyme complex; P:neurogenesis; C:microtubule associated complex; P:aspartyl-tRNA aminoacylation; P:growth	EC:6.1.1.12	Aspartate--tRNA ligase	IPR002312 (PRINTS); G3DSA:2.40.50.140 (GENE3D); G3DSA:3.30.930.10 (GENE3D); IPR004523 (TIGRFAM); IPR004365 (PFAM); IPR004364 (PFAM); mobidb-lite (MOBIDB_LITE); PTHR43450 (PANTHER); PTHR43450:SF1 (PANTHER); IPR006195 (PROSITE_PROFILES); IPR004523 (HAMAP); cd00776 (CDD); cd04320 (CDD); IPR012340 (SUPERFAMILY); SSF55681 (SUPERFAMILY)	F:GO:0000166; F:GO:0003676; F:GO:0005524; P:GO:0006418; F:GO:0004812; C:GO:0005737; F:GO:0004815; P:GO:0006422	F:nucleotide binding; F:nucleic acid binding; F:ATP binding; P:tRNA aminoacylation for protein translation; F:aminoacyl-tRNA ligase activity; C:cytoplasm; F:aspartate-tRNA ligase activity; P:aspartyl-tRNA aminoacylation
GMOY003196-PA	chitinase Idgf2	1302	20	0	84.9	6	F:GO:0004568; P:GO:0005975; P:GO:0006032; P:GO:0007275; C:GO:0016021; C:GO:0005576	F:chitinase activity; P:carbohydrate metabolic process; P:chitin catabolic process; P:multicellular organism development; C:integral component of membrane; C:extracellular region	EC:3.2.1.14	Chitinase	IPR011583 (SMART); G3DSA:3.20.20.80 (GENE3D); IPR001223 (PFAM); IPR015520 (PTHR11177:PANTHER); PTHR11177 (PANTHER); IPR015520 (PTHR11177:PANTHER); PTHR11177 (PANTHER); IPR015520 (CDD); IPR015520 (CDD); IPR015520 (CDD); IPR017853 (SUPERFAMILY); IPR017853 (SUPERFAMILY); IPR029070 (SUPERFAMILY); IPR029070 (SUPERFAMILY); IPR017853 (SUPERFAMILY); IPR029070 (SUPERFAMILY)	P:GO:0005975; F:GO:0008061	P:carbohydrate metabolic process; F:chitin binding
GMOY011807-PA	heterogeneous nuclear ribonucleo 87F	375	20	1.81465e-126	95.3	4	F:GO:0000166; F:GO:0003676; C:GO:0030529; C:GO:0019013	F:nucleotide binding; F:nucleic acid binding; C:intracellular ribonucleoprotein complex; C:viral nucleocapsid			IPR000504 (SMART); G3DSA:3.30.70.330 (GENE3D); IPR000504 (PFAM); mobidb-lite (MOBIDB_LITE); PTHR43921 (PANTHER); PTHR43921:SF2 (PANTHER); IPR000504 (PROSITE_PROFILES); IPR000504 (PROSITE_PROFILES); cd12578 (CDD); cd12328 (CDD); IPR035979 (SUPERFAMILY); IPR035979 (SUPERFAMILY)	F:GO:0003676	F:nucleic acid binding
GMOY002262-PA	serpin B3	444	20	0	76.6	3	C:GO:0005615; P:GO:0006508; F:GO:0008233	C:extracellular space; P:proteolysis; F:peptidase activity			IPR023796 (SMART); IPR023796 (PFAM); G3DSA:2.30.39.10 (GENE3D); G3DSA:3.30.497.10 (GENE3D); IPR000215 (PANTHER); PTHR11461:SF46 (PANTHER); cd00172 (CDD); IPR036186 (SUPERFAMILY)	C:GO:0005615	C:extracellular space
GMOY006352-PA	acidic leucine-rich nuclear phospho 32 family member B	152	12	2.21416e-16	68.58						mobidb-lite (MOBIDB_LITE)	no GO terms	no GO terms
GMOY010829-PA	sorbitol dehydrogenase	358	20	0	85.45	3	F:GO:0008270; F:GO:0016491; P:GO:0055114	F:zinc ion binding; F:oxidoreductase activity; P:oxidation-reduction process			IPR020843 (SMART); IPR013149 (PFAM); G3DSA:3.90.180.10 (GENE3D); G3DSA:3.40.50.720 (GENE3D); IPR013154 (PFAM); PTHR43161 (PANTHER); PTHR43161:SF9 (PANTHER); cd05285 (CDD); IPR011032 (SUPERFAMILY); IPR036291 (SUPERFAMILY)	F:GO:0016491; P:GO:0055114	F:oxidoreductase activity; P:oxidation-reduction process
GMOY006110-PA	leucine--tRNA cytoplasmic	1189	20	0	86.95	12	F:GO:0005524; P:GO:0006429; F:GO:0004823; P:GO:0042060; C:GO:0005759; P:GO:0006450; P:GO:0006508; F:GO:0002161; F:GO:0004252; C:GO:0017101; P:GO:0022008; C:GO:0005875	F:ATP binding; P:leucyl-tRNA aminoacylation; F:leucine-tRNA ligase activity; P:wound healing; C:mitochondrial matrix; P:regulation of translational fidelity; P:proteolysis; F:aminoacyl-tRNA editing activity; F:serine-type endopeptidase activity; C:aminoacyl-tRNA synthetase multienzyme complex; P:neurogenesis; C:microtubule associated complex	EC:3.4.21; EC:6.1.1.4; EC:3.1.1.1	Acting on peptide bonds (peptidases); Leucine--tRNA ligase; Carboxylesterase	IPR002300 (PFAM); IPR004493 (TIGRFAM); G3DSA:1.10.730.10 (GENE3D); IPR014729 (G3DSA:3.40.50.GENE3D); IPR013155 (PFAM); mobidb-lite (MOBIDB_LITE); PTHR11946 (PANTHER); IPR004493 (PTHR11946:PANTHER); cd00812 (CDD); cd07959 (CDD); SSF52374 (SUPERFAMILY); IPR009080 (SUPERFAMILY); IPR009008 (SUPERFAMILY)	F:GO:0000166; F:GO:0005524; P:GO:0006418; P:GO:0006429; F:GO:0004812; F:GO:0004823; C:GO:0005737; F:GO:0002161	F:nucleotide binding; F:ATP binding; P:tRNA aminoacylation for protein translation; P:leucyl-tRNA aminoacylation; F:aminoacyl-tRNA ligase activity; F:leucine-tRNA ligase activity; C:cytoplasm; F:aminoacyl-tRNA editing activity
GMOY004617-PA	---NA---	570									mobidb-lite (MOBIDB_LITE); mobidb-lite (MOBIDB_LITE); mobidb-lite (MOBIDB_LITE)	no GO terms	no GO terms
GMOY002897-PA	cytochrome b-c1 complex subunit mitochondrial	443	20	0	77.25	3	F:GO:0046872; P:GO:0006508; F:GO:0004222	F:metal ion binding; P:proteolysis; F:metalloendopeptidase activity	EC:3.4.24	Acting on peptide bonds (peptidases)	IPR007863 (PFAM); IPR011765 (PFAM); G3DSA:3.30.830.10 (GENE3D); G3DSA:3.30.830.10 (GENE3D); mobidb-lite (MOBIDB_LITE); PTHR11851 (PANTHER); PTHR11851:SF49 (PANTHER); IPR011249 (SUPERFAMILY); IPR011249 (SUPERFAMILY)	F:GO:0003824; F:GO:0046872	F:catalytic activity; F:metal ion binding
GMOY008618-PA	Dolichyl-diphosphooligosaccharide-- glycosyltransferase 48 kDa subunit	475	20	0	85.95	4	C:GO:0005789; F:GO:0016757; C:GO:0016021; P:GO:0018279	C:endoplasmic reticulum membrane; F:transferase activity, transferring glycosyl groups; C:integral component of membrane; P:protein N-linked glycosylation via asparagine			IPR005013 (PFAM); IPR029062 (G3DSA:3.40.50.GENE3D); IPR005013 (PANTHER)	C:GO:0005789; P:GO:0018279	C:endoplasmic reticulum membrane; P:protein N-linked glycosylation via asparagine
GMOY008502-PA	ferritin subunit	205	20	4.23614e-157	86.15	16	P:GO:0008283; F:GO:0008199; F:GO:0008198; C:GO:0008043; P:GO:0009791; C:GO:0005794; P:GO:0009620; C:GO:0045169; C:GO:0005576; F:GO:0004322; C:GO:0005875; P:GO:1990461; P:GO:0006879; P:GO:0097459; P:GO:0030431; P:GO:0055114	P:cell proliferation; F:ferric iron binding; F:ferrous iron binding; C:intracellular ferritin complex; P:post-embryonic development; C:Golgi apparatus; P:response to fungus; C:fusome; C:extracellular region; F:ferroxidase activity; C:microtubule associated complex; P:detoxification of iron ion; P:cellular iron ion homeostasis; P:iron ion import into cell; P:sleep; P:oxidation-reduction process	EC:1.16.3.1; EC:1.16.3	Ferroxidase; Oxidizing metal ions	IPR012347 (G3DSA:1.20.1260.GENE3D); IPR008331 (PFAM); IPR001519 (PANTHER); PTHR11431:SF43 (PANTHER); IPR009040 (PROSITE_PROFILES); cd01056 (CDD); IPR009078 (SUPERFAMILY)	P:GO:0006879; F:GO:0008199; P:GO:0006826	P:cellular iron ion homeostasis; F:ferric iron binding; P:iron ion transport
GMOY007655-PA	Calmodulin	158	20	1.28995e-100	93	30	P:GO:0046716; P:GO:0007099; P:GO:0006468; C:GO:0005875; C:GO:0005654; P:GO:0007605; F:GO:0005509; P:GO:0051383; P:GO:0007608; C:GO:0031475; C:GO:0005829; C:GO:0031476; P:GO:0030048; P:GO:2001020; P:GO:0035071; C:GO:0005886; P:GO:0051533; C:GO:0097431; P:GO:0016060; P:GO:0016061; P:GO:0072499; C:GO:0005814; P:GO:0016062; P:GO:0042052; P:GO:0046331; P:GO:2001259; C:GO:0030496; C:GO:0016028; F:GO:00…	P:muscle cell cellular homeostasis; P:centriole replication; P:protein phosphorylation; C:microtubule associated complex; C:nucleoplasm; P:sensory perception of sound; F:calcium ion binding; P:kinetochore organization; P:sensory perception of smell; C:myosin V complex; C:cytosol; C:myosin VI complex; P:actin filament-based movement; P:regulation of response to DNA damage stimulus; P:salivary glan…			IPR002048 (SMART); IPR002048 (PFAM); IPR023198 (G3DSA:1.10.150.GENE3D); G3DSA:1.10.238.10 (GENE3D); G3DSA:1.10.238.10 (GENE3D); PTHR23050 (PANTHER); PTHR23050:SF236 (PANTHER); IPR002048 (PROSITE_PROFILES); IPR002048 (PROSITE_PROFILES); IPR002048 (PROSITE_PROFILES); IPR002048 (PROSITE_PROFILES); IPR002048 (CDD); IPR002048 (CDD); IPR011992 (SUPERFAMILY)	F:GO:0005509	F:calcium ion binding
GMOY009484-PA	pyrroline-5-carboxylate reductase 3	260	20	2.23937e-174	75.95	3	F:GO:0004735; P:GO:0055114; P:GO:0055129	F:pyrroline-5-carboxylate reductase activity; P:oxidation-reduction process; P:L-proline biosynthetic process	EC:1.5.1.2	Pyrroline-5-carboxylate reductase	IPR000304 (PIRSF); G3DSA:3.40.50.720 (GENE3D); IPR028939 (PFAM); G3DSA:1.10.3730.10 (GENE3D); IPR029036 (PFAM); G3DSA:1.10.3730.10 (GENE3D); PTHR11645 (PANTHER); PTHR11645 (PANTHER); PTHR11645:SF46 (PANTHER); PTHR11645:SF46 (PANTHER); IPR036291 (SUPERFAMILY); IPR008927 (SUPERFAMILY)	F:GO:0004735; P:GO:0006561; P:GO:0055114	F:pyrroline-5-carboxylate reductase activity; P:proline biosynthetic process; P:oxidation-reduction process
GMOY000140-PA	sulfhydryl oxidase 1	640	20	0	72.1	5	C:GO:0005623; C:GO:0016021; P:GO:0045454; P:GO:0055114; F:GO:0016971	C:cell; C:integral component of membrane; P:cell redox homeostasis; P:oxidation-reduction process; F:flavin-linked sulfhydryl oxidase activity	EC:1.8.3.2	Thiol oxidase	IPR017905 (PFAM); IPR036774 (G3DSA:1.20.120.GENE3D); G3DSA:3.40.30.10 (GENE3D); IPR013766 (PFAM); PTHR22897 (PANTHER); IPR017905 (PROSITE_PROFILES); IPR013766 (PROSITE_PROFILES); IPR036249 (SUPERFAMILY); IPR036774 (SUPERFAMILY)	P:GO:0055114; P:GO:0045454; F:GO:0016972	P:oxidation-reduction process; P:cell redox homeostasis; F:thiol oxidase activity
GMOY004611-PA	general vesicular transport factor p115	849	20	0	87.3	8	P:GO:0007030; F:GO:0008565; C:GO:0000139; C:GO:0005783; P:GO:0051726; P:GO:0006886; C:GO:0005795; P:GO:0048280	P:Golgi organization; F:protein transporter activity; C:Golgi membrane; C:endoplasmic reticulum; P:regulation of cell cycle; P:intracellular protein transport; C:Golgi stack; P:vesicle fusion with Golgi apparatus			IPR000225 (SMART); IPR006953 (PFAM); IPR011989 (G3DSA:1.25.10.GENE3D); IPR006955 (PFAM); mobidb-lite (MOBIDB_LITE); mobidb-lite (MOBIDB_LITE); PTHR10013 (PANTHER); IPR000225 (PROSITE_PROFILES); IPR016024 (SUPERFAMILY)	F:GO:0005515; C:GO:0005737; C:GO:0016020; F:GO:0008565; C:GO:0000139; P:GO:0006886; F:GO:0005488; P:GO:0048280	F:protein binding; C:cytoplasm; C:membrane; F:protein transporter activity; C:Golgi membrane; P:intracellular protein transport; F:binding; P:vesicle fusion with Golgi apparatus
GMOY003173-PA	zinc finger on ecdysone puffs isoform X2	718	20	0	78.35	1	F:GO:0046872	F:metal ion binding			IPR013087 (SMART); G3DSA:2.40.155.10 (GENE3D); IPR022755 (PFAM); G3DSA:2.160.10.10 (GENE3D); mobidb-lite (MOBIDB_LITE); mobidb-lite (MOBIDB_LITE); mobidb-lite (MOBIDB_LITE); mobidb-lite (MOBIDB_LITE); IPR026811 (PANTHER); IPR013087 (PROSITE_PROFILES); IPR036236 (SUPERFAMILY); IPR036236 (SUPERFAMILY)	F:GO:0003676	F:nucleic acid binding
GMOY002285-PA	heterogeneous nuclear ribonucleo 27C	422	20	0	96.15	17	P:GO:0045727; P:GO:0007411; P:GO:0007298; C:GO:0043234; C:GO:0005730; C:GO:0005654; F:GO:0003697; F:GO:0003730; F:GO:0000166; P:GO:0007319; F:GO:0005515; F:GO:0048027; C:GO:0043186; P:GO:0045451; P:GO:0046331; P:GO:0048024; C:GO:0019013	P:positive regulation of translation; P:axon guidance; P:border follicle cell migration; C:protein complex; C:nucleolus; C:nucleoplasm; F:single-stranded DNA binding; F:mRNA 3'-UTR binding; F:nucleotide binding; P:negative regulation of oskar mRNA translation; F:protein binding; F:mRNA 5'-UTR binding; C:P granule; P:pole plasm oskar mRNA localization; P:lateral inhibition; P:regulation of mRNA sp…			IPR000504 (SMART); IPR000504 (PFAM); G3DSA:3.30.70.330 (GENE3D); G3DSA:3.30.70.330 (GENE3D); mobidb-lite (MOBIDB_LITE); mobidb-lite (MOBIDB_LITE); mobidb-lite (MOBIDB_LITE); mobidb-lite (MOBIDB_LITE); PTHR44212 (PANTHER); PTHR44212:SF3 (PANTHER); IPR000504 (PROSITE_PROFILES); IPR000504 (PROSITE_PROFILES); IPR034131 (CDD); IPR034134 (CDD); IPR035979 (SUPERFAMILY); IPR035979 (SUPERFAMILY)	F:GO:0003676; F:GO:0003723	F:nucleic acid binding; F:RNA binding
GMOY006894-PA	selenium-binding 1	504	20	0	82.25	1	F:GO:0008430	F:selenium binding			IPR008826 (PFAM); IPR015943 (G3DSA:2.130.10.GENE3D); PTHR23300:SF0 (PANTHER); PTHR23300:SF0 (PANTHER); IPR008826 (PANTHER); IPR008826 (PANTHER); SSF75011 (SUPERFAMILY)	F:GO:0005515; F:GO:0008430	F:protein binding; F:selenium binding
GMOY004175-PA	cAMP-dependent kinase type II regulatory subunit isoform X1	115	20	1.81613e-17	76	3	F:GO:0000166; P:GO:0001932; F:GO:0016740	F:nucleotide binding; P:regulation of protein phosphorylation; F:transferase activity			IPR003117 (SMART); IPR003117 (PFAM); IPR036536 (G3DSA:1.20.890.GENE3D); mobidb-lite (MOBIDB_LITE); IPR036536 (SUPERFAMILY)	no GO terms	no GO terms
GMOY002421-PA	60 kDa heat shock mitochondrial	571	20	0	95.8	3	F:GO:0005524; C:GO:0005737; P:GO:0042026	F:ATP binding; C:cytoplasm; P:protein refolding			IPR001844 (PRINTS); IPR002423 (PFAM); IPR027413 (G3DSA:1.10.560.GENE3D); IPR027413 (G3DSA:1.10.560.GENE3D); IPR001844 (TIGRFAM); IPR027409 (G3DSA:3.50.7.GENE3D); PTHR11353:SF64 (PANTHER); IPR002423 (PANTHER); IPR001844 (CDD); IPR027409 (SUPERFAMILY); IPR027413 (SUPERFAMILY); IPR037290 (SUPERFAMILY)	F:GO:0005524; C:GO:0005737; P:GO:0042026	F:ATP binding; C:cytoplasm; P:protein refolding
GMOY009985-PA	histone H2B	227	20	4.7408e-60	98	7	C:GO:0005811; F:GO:0003677; C:GO:0035267; F:GO:0046982; C:GO:0016021; P:GO:0006333; C:GO:0000788	C:lipid particle; F:DNA binding; C:NuA4 histone acetyltransferase complex; F:protein heterodimerization activity; C:integral component of membrane; P:chromatin assembly or disassembly; C:nuclear nucleosome			IPR001951 (PRINTS); IPR001951 (SMART); IPR000558 (SMART); IPR004823 (SMART); IPR007125 (PFAM); G3DSA:1.10.20.10 (GENE3D); G3DSA:1.10.20.10 (GENE3D); IPR035425 (PFAM); mobidb-lite (MOBIDB_LITE); PTHR10484:SF160 (PANTHER); PTHR10484 (PANTHER); IPR001951 (CDD); IPR009072 (SUPERFAMILY); IPR009072 (SUPERFAMILY)	C:GO:0005634; F:GO:0003677; F:GO:0046982; P:GO:0006352; C:GO:0000786	C:nucleus; F:DNA binding; F:protein heterodimerization activity; P:DNA-templated transcription, initiation; C:nucleosome
GMOY002747-PA	histone H2B	67	20	7.59847e-47	100	6	C:GO:0005811; F:GO:0003677; C:GO:0035267; F:GO:0046982; C:GO:0000786; P:GO:0042742	C:lipid particle; F:DNA binding; C:NuA4 histone acetyltransferase complex; F:protein heterodimerization activity; C:nucleosome; P:defense response to bacterium			IPR000558 (PRINTS); IPR000558 (SMART); G3DSA:1.10.20.10 (GENE3D); IPR007125 (PFAM); IPR000558 (PANTHER); PTHR23428:SF173 (PANTHER); IPR009072 (SUPERFAMILY)	F:GO:0003677; F:GO:0046982; C:GO:0000786	F:DNA binding; F:protein heterodimerization activity; C:nucleosome
GMOY000629-PA	histone H2B	121	20	4.14215e-64	98.15	7	C:GO:0005811; F:GO:0003677; C:GO:0035267; F:GO:0046982; C:GO:0016021; P:GO:0006333; C:GO:0000788	C:lipid particle; F:DNA binding; C:NuA4 histone acetyltransferase complex; F:protein heterodimerization activity; C:integral component of membrane; P:chromatin assembly or disassembly; C:nuclear nucleosome			IPR000558 (PRINTS); IPR000558 (SMART); IPR007125 (PFAM); G3DSA:1.10.20.10 (GENE3D); mobidb-lite (MOBIDB_LITE); IPR000558 (PANTHER); PTHR23428:SF173 (PANTHER); IPR009072 (SUPERFAMILY)	F:GO:0003677; F:GO:0046982; C:GO:0000786	F:DNA binding; F:protein heterodimerization activity; C:nucleosome
GMOY000268-PA	Histone H4	121	20	6.29857e-52	100	36	F:GO:0016887; P:GO:0007275; C:GO:0005871; P:GO:0006303; P:GO:0007018; P:GO:0051290; P:GO:1904837; C:GO:0005654; C:GO:0005874; F:GO:0005524; C:GO:0070062; F:GO:0046982; P:GO:0000183; P:GO:0001503; C:GO:0031012; P:GO:0016233; F:GO:0031490; F:GO:0019904; P:GO:0045815; P:GO:0044267; F:GO:0000987; C:GO:0000788; P:GO:0006352; P:GO:0045653; C:GO:0000784; P:GO:0034080; F:GO:0008017; P:GO:0006335; C:GO:00…	F:ATPase activity; P:multicellular organism development; C:kinesin complex; P:double-strand break repair via nonhomologous end joining; P:microtubule-based movement; P:protein heterotetramerization; P:beta-catenin-TCF complex assembly; C:nucleoplasm; C:microtubule; F:ATP binding; C:extracellular exosome; F:protein heterodimerization activity; P:chromatin silencing at rDNA; P:ossification; C:extra…	EC:3.6.1.3; EC:3.6.1.15	Adenosinetriphosphatase; Nucleoside-triphosphate phosphatase	IPR001951 (PRINTS); IPR001951 (SMART); IPR004823 (SMART); IPR035425 (PFAM); G3DSA:1.10.20.10 (GENE3D); PTHR10484 (PANTHER); PTHR10484:SF160 (PANTHER); IPR001951 (CDD); IPR009072 (SUPERFAMILY)	C:GO:0005634; F:GO:0003677; F:GO:0046982; P:GO:0006352; C:GO:0000786	C:nucleus; F:DNA binding; F:protein heterodimerization activity; P:DNA-templated transcription, initiation; C:nucleosome
GMOY010661-PA	Polyadenylate-binding	2462	20	0	92.35	3	F:GO:0000166; F:GO:0003723; C:GO:0005737	F:nucleotide binding; F:RNA binding; C:cytoplasm			IPR001965 (SMART); IPR000504 (SMART); IPR003954 (SMART); IPR002004 (SMART); IPR013083 (G3DSA:3.30.40.GENE3D); IPR002004 (PFAM); IPR025894 (PFAM); IPR006515 (TIGRFAM); G3DSA:3.30.70.330 (GENE3D); IPR000504 (PFAM); G3DSA:2.30.30.140 (GENE3D); G3DSA:1.10.1900.10 (GENE3D); G3DSA:3.30.70.330 (GENE3D); G3DSA:3.30.70.330 (GENE3D); IPR013083 (G3DSA:3.30.40.GENE3D); mobidb-lite (MOBIDB_LITE); mobidb-lite …	F:GO:0003676; F:GO:0003723	F:nucleic acid binding; F:RNA binding
GMOY009366-PA	hu-li tai shao isoform X1	2053	20	0	87.6	20	P:GO:0007282; C:GO:0016328; C:GO:0035183; P:GO:0007294; P:GO:0061572; P:GO:0008302; P:GO:0045214; C:GO:0045169; C:GO:0005884; P:GO:0000212; C:GO:0005811; P:GO:0030723; P:GO:0031987; P:GO:0070050; P:GO:0007527; P:GO:0030724; P:GO:0051297; P:GO:0072499; P:GO:0048135; C:GO:0045170	P:cystoblast division; C:lateral plasma membrane; C:female germline ring canal inner rim; P:germarium-derived oocyte fate determination; P:actin filament bundle organization; P:female germline ring canal formation, actin assembly; P:sarcomere organization; C:fusome; C:actin filament; P:meiotic spindle organization; C:lipid particle; P:ovarian fusome organization; P:locomotion involved in locomoto…			IPR001303 (SMART); G3DSA:1.20.120.330 (GENE3D); IPR036409 (G3DSA:3.40.225.GENE3D); IPR001303 (PFAM); mobidb-lite (MOBIDB_LITE); mobidb-lite (MOBIDB_LITE); mobidb-lite (MOBIDB_LITE); mobidb-lite (MOBIDB_LITE); mobidb-lite (MOBIDB_LITE); mobidb-lite (MOBIDB_LITE); mobidb-lite (MOBIDB_LITE); mobidb-lite (MOBIDB_LITE); mobidb-lite (MOBIDB_LITE); mobidb-lite (MOBIDB_LITE); PTHR10672 (PANTHER); PTHR106…	no GO terms	no GO terms
GMOY005787-PA	FK506-binding 2 isoform X2	210	20	2.86542e-148	93.05	3	F:GO:0005509; P:GO:0006457; F:GO:0016853	F:calcium ion binding; P:protein folding; F:isomerase activity			IPR002048 (SMART); G3DSA:1.10.238.10 (GENE3D); G3DSA:3.10.50.40 (GENE3D); IPR001179 (PFAM); G3DSA:1.10.238.10 (GENE3D); IPR002048 (PFAM); PTHR10516:SF384 (PANTHER); IPR023566 (PANTHER); IPR001179 (PROSITE_PROFILES); IPR002048 (PROSITE_PROFILES); IPR002048 (PROSITE_PROFILES); IPR002048 (CDD); IPR011992 (SUPERFAMILY); SSF54534 (SUPERFAMILY)	F:GO:0005509	F:calcium ion binding
GMOY002766-PA	26S protease regulatory subunit 6B	409	20	0	98.15	8	F:GO:0016887; F:GO:0005524; P:GO:0043161; C:GO:0008540; C:GO:0005737; F:GO:0008233; P:GO:0006974; C:GO:0001673	F:ATPase activity; F:ATP binding; P:proteasome-mediated ubiquitin-dependent protein catabolic process; C:proteasome regulatory particle, base subcomplex; C:cytoplasm; F:peptidase activity; P:cellular response to DNA damage stimulus; C:male germ cell nucleus	EC:3.6.1.3; EC:3.6.1.15	Adenosinetriphosphatase; Nucleoside-triphosphate phosphatase	IPR001270 (PRINTS); IPR003593 (SMART); IPR005937 (TIGRFAM); G3DSA:1.10.8.60 (GENE3D); G3DSA:3.40.50.300 (GENE3D); IPR003959 (PFAM); IPR035256 (PTHR23073:PANTHER); PTHR23073 (PANTHER); cd00009 (CDD); IPR027417 (SUPERFAMILY)	F:GO:0005524; C:GO:0005737; P:GO:0030163; F:GO:0036402; F:GO:0016787	F:ATP binding; C:cytoplasm; P:protein catabolic process; F:proteasome-activating ATPase activity; F:hydrolase activity
GMOY002902-PA	succinyl- :3-ketoacid coenzyme A transferase mitochondrial	519	20	0	87.9	3	F:GO:0008260; C:GO:0005759; P:GO:0046952	F:3-oxoacid CoA-transferase activity; C:mitochondrial matrix; P:ketone body catabolic process	EC:2.8.3.5	3-oxoacid CoA-transferase	IPR004165 (SMART); IPR004165 (PFAM); G3DSA:3.40.1080.10 (GENE3D); IPR014388 (PIRSF); G3DSA:3.40.1080.10 (GENE3D); IPR012792 (TIGRFAM); IPR012791 (TIGRFAM); IPR004165 (PANTHER); PTHR13707:SF23 (PANTHER); IPR037171 (SUPERFAMILY); IPR037171 (SUPERFAMILY)	P:GO:0008152; P:GO:0046952; F:GO:0008410	P:metabolic process; P:ketone body catabolic process; F:CoA-transferase activity
GMOY004813-PA	dihydrolipoyllysine-residue acetyltransferase component of pyruvate dehydrogenase mitochondrial isoform X1	510	20	0	83.3	3	C:GO:0045254; P:GO:0006090; F:GO:0004742	C:pyruvate dehydrogenase complex; P:pyruvate metabolic process; F:dihydrolipoyllysine-residue acetyltransferase activity	EC:2.3.1.12	Dihydrolipoyllysine-residue acetyltransferase	G3DSA:3.30.559.10 (GENE3D); IPR006257 (TIGRFAM); IPR000089 (PFAM); G3DSA:2.40.50.100 (GENE3D); IPR001078 (PFAM); mobidb-lite (MOBIDB_LITE); PTHR23151:SF9 (PANTHER); PTHR23151 (PANTHER); IPR000089 (PROSITE_PROFILES); cd06849 (CDD); SSF52777 (SUPERFAMILY); IPR011053 (SUPERFAMILY)	F:GO:0016746; C:GO:0045254; P:GO:0008152; P:GO:0006090; F:GO:0004742	F:transferase activity, transferring acyl groups; C:pyruvate dehydrogenase complex; P:metabolic process; P:pyruvate metabolic process; F:dihydrolipoyllysine-residue acetyltransferase activity
GMOY010075-PA	60S acidic ribosomal P2	113	20	4.42143e-33	90.75	3	F:GO:0003735; C:GO:0005840; P:GO:0006414	F:structural constituent of ribosome; C:ribosome; P:translational elongation			PF00428 (PFAM); mobidb-lite (MOBIDB_LITE); PTHR21141 (PANTHER); PTHR21141:SF5 (PANTHER); IPR027534 (HAMAP); cd05833 (CDD)	F:GO:0003735; C:GO:0005840; P:GO:0006414; C:GO:0005622	F:structural constituent of ribosome; C:ribosome; P:translational elongation; C:intracellular
GMOY006589-PA	poly(U)-specific endoribonuclease homolog	608	20	0	80.15	1	F:GO:0016788	F:hydrolase activity, acting on ester bonds			IPR018998 (PFAM); mobidb-lite (MOBIDB_LITE); PTHR12439:SF11 (PANTHER); PTHR12439 (PANTHER); IPR037227 (SUPERFAMILY)	F:GO:0004521	F:endoribonuclease activity
GMOY006412-PA	hypothetical protein FF38_08027	206	20	1.29002e-73	56.3						no IPS match	no IPS match	no IPS match
GMOY007591-PA	26S protease regulatory subunit 8	404	20	0	98.7	11	F:GO:0016887; C:GO:0005634; F:GO:0005524; P:GO:0043161; C:GO:0008540; C:GO:0005737; F:GO:0000062; P:GO:0022008; F:GO:0008233; P:GO:0006974; C:GO:0005875	F:ATPase activity; C:nucleus; F:ATP binding; P:proteasome-mediated ubiquitin-dependent protein catabolic process; C:proteasome regulatory particle, base subcomplex; C:cytoplasm; F:fatty-acyl-CoA binding; P:neurogenesis; F:peptidase activity; P:cellular response to DNA damage stimulus; C:microtubule associated complex	EC:3.6.1.3; EC:3.6.1.15	Adenosinetriphosphatase; Nucleoside-triphosphate phosphatase	IPR003593 (SMART); IPR005937 (TIGRFAM); G3DSA:1.10.8.60 (GENE3D); IPR003959 (PFAM); G3DSA:3.40.50.300 (GENE3D); IPR029067 (G3DSA:3.10.330.GENE3D); IPR035261 (PTHR23073:PANTHER); PTHR23073 (PANTHER); cd00009 (CDD); IPR027417 (SUPERFAMILY)	F:GO:0005524; C:GO:0005737; P:GO:0030163; F:GO:0036402; F:GO:0016787	F:ATP binding; C:cytoplasm; P:protein catabolic process; F:proteasome-activating ATPase activity; F:hydrolase activity
GMOY006516-PA	V-type proton ATPase subunit C	714	20	0	92.5	5	C:GO:0000221; C:GO:0033181; P:GO:0015991; P:GO:0019233; F:GO:0046961	C:vacuolar proton-transporting V-type ATPase, V1 domain; C:plasma membrane proton-transporting V-type ATPase complex; P:ATP hydrolysis coupled proton transport; P:sensory perception of pain; F:proton-transporting ATPase activity, rotational mechanism	EC:3.6.1.3; EC:3.6.1.15	Adenosinetriphosphatase; Nucleoside-triphosphate phosphatase	G3DSA:3.30.70.1180 (GENE3D); IPR004907 (PFAM); G3DSA:1.20.1460.10 (GENE3D); mobidb-lite (MOBIDB_LITE); mobidb-lite (MOBIDB_LITE); mobidb-lite (MOBIDB_LITE); IPR004907 (PANTHER); IPR004907 (CDD); IPR036132 (SUPERFAMILY); IPR036132 (SUPERFAMILY)	P:GO:0015991; F:GO:0015078; C:GO:0033180	P:ATP hydrolysis coupled proton transport; F:hydrogen ion transmembrane transporter activity; C:proton-transporting V-type ATPase, V1 domain
GMOY007382-PA	reticulon-1-A isoform X5	219	20	2.08739e-144	91.8	2	C:GO:0005789; C:GO:0016021	C:endoplasmic reticulum membrane; C:integral component of membrane			IPR003388 (PFAM); PTHR10994:SF25 (PANTHER); PTHR10994 (PANTHER); IPR003388 (PROSITE_PROFILES)	no GO terms	no GO terms
GMOY001920-PA	---NA---	422									IPR003307 (SMART); G3DSA:1.25.40.180 (GENE3D); G3DSA:1.25.40.180 (GENE3D); IPR003307 (PFAM); mobidb-lite (MOBIDB_LITE); PTHR14208 (PANTHER); IPR003307 (PROSITE_PROFILES); cd11560 (CDD); IPR016024 (SUPERFAMILY)	F:GO:0005515; F:GO:0005488	F:protein binding; F:binding
GMOY002944-PA	---NA---	156									mobidb-lite (MOBIDB_LITE)	no GO terms	no GO terms
GMOY005979-PA	---NA---	439									IPR000644 (SMART); IPR005857 (TIGRFAM); G3DSA:3.40.50.1100 (GENE3D); IPR000644 (PFAM); G3DSA:3.40.50.1100 (GENE3D); IPR001926 (PFAM); G3DSA:3.10.580.10 (GENE3D); PTHR10314 (PANTHER); PTHR10314:SF134 (PANTHER); IPR000644 (PROSITE_PROFILES); IPR000644 (PROSITE_PROFILES); cd01561 (CDD); IPR036052 (SUPERFAMILY); SSF54631 (SUPERFAMILY)	C:GO:0005737; P:GO:0019343; F:GO:0004122	C:cytoplasm; P:cysteine biosynthetic process via cystathionine; F:cystathionine beta-synthase activity
GMOY001361-PA	40S ribosomal S8	208	20	5.02103e-138	95.3	5	P:GO:0035167; F:GO:0003735; C:GO:0022627; P:GO:0002181; P:GO:0022008	P:larval lymph gland hemopoiesis; F:structural constituent of ribosome; C:cytosolic small ribosomal subunit; P:cytoplasmic translation; P:neurogenesis			IPR001047 (TIGRFAM); IPR022309 (PFAM); mobidb-lite (MOBIDB_LITE); mobidb-lite (MOBIDB_LITE); IPR001047 (PANTHER); cd11380 (CDD)	F:GO:0003735; C:GO:0005840; C:GO:0005622; P:GO:0006412	F:structural constituent of ribosome; C:ribosome; C:intracellular; P:translation
GMOY009457-PA	V-type proton ATPase subunit D 1	246	20	5.61067e-173	97.05	2	F:GO:0042626; P:GO:0055085	F:ATPase activity, coupled to transmembrane movement of substances; P:transmembrane transport	EC:3.6.1.3; EC:3.6.1.15	Adenosinetriphosphatase; Nucleoside-triphosphate phosphatase	IPR002699 (PFAM); IPR002699 (TIGRFAM); IPR002699 (PANTHER)	F:GO:0042626	F:ATPase activity, coupled to transmembrane movement of substances
GMOY010873-PA	60S ribosomal L19	179	20	3.0285e-100	85.2	4	F:GO:0003735; P:GO:0051298; P:GO:0002181; C:GO:0022625	F:structural constituent of ribosome; P:centrosome duplication; P:cytoplasmic translation; C:cytosolic large ribosomal subunit			IPR000196 (SMART); IPR015973 (G3DSA:1.20.5.GENE3D); IPR015972 (G3DSA:1.10.1650.GENE3D); IPR015974 (G3DSA:1.10.1200.GENE3D); IPR000196 (PFAM); mobidb-lite (MOBIDB_LITE); PTHR10722 (PANTHER); PTHR10722 (PANTHER); PTHR10722:SF0 (PANTHER); PTHR10722:SF0 (PANTHER); IPR033935 (CDD); IPR035970 (SUPERFAMILY)	F:GO:0003735; C:GO:0022625; C:GO:0005840; C:GO:0005622; P:GO:0006412	F:structural constituent of ribosome; C:cytosolic large ribosomal subunit; C:ribosome; C:intracellular; P:translation
GMOY001340-PA	glycine-rich cell wall structural	315	20	2.0534e-08	90.1						mobidb-lite (MOBIDB_LITE); mobidb-lite (MOBIDB_LITE); mobidb-lite (MOBIDB_LITE); mobidb-lite (MOBIDB_LITE); mobidb-lite (MOBIDB_LITE)	no GO terms	no GO terms
GMOY002066-PA	transport Sec31A isoform X1	1225	20	0	70.15						IPR001680 (SMART); G3DSA:1.20.940.10 (GENE3D); IPR015943 (G3DSA:2.130.10.GENE3D); IPR024298 (PFAM); IPR011990 (G3DSA:1.25.40.GENE3D); mobidb-lite (MOBIDB_LITE); mobidb-lite (MOBIDB_LITE); mobidb-lite (MOBIDB_LITE); mobidb-lite (MOBIDB_LITE); mobidb-lite (MOBIDB_LITE); PTHR13923 (PANTHER); IPR001680 (PROSITE_PROFILES); IPR017986 (PROSITE_PROFILES); IPR036322 (SUPERFAMILY)	F:GO:0005515	F:protein binding
GMOY004419-PA	staphylococcal nuclease domain-containing 1	929	20	0	88.75	11	C:GO:0005811; C:GO:0005634; F:GO:0003712; P:GO:0035194; P:GO:0007283; P:GO:0010529; F:GO:0004518; C:GO:0005829; C:GO:0016442; P:GO:1903506; C:GO:0005875	C:lipid particle; C:nucleus; F:transcription cofactor activity; P:posttranscriptional gene silencing by RNA; P:spermatogenesis; P:negative regulation of transposition; F:nuclease activity; C:cytosol; C:RISC complex; P:regulation of nucleic acid-templated transcription; C:microtubule associated complex			IPR016071 (SMART); IPR002999 (SMART); IPR016685 (PIRSF); IPR035437 (G3DSA:2.40.50.GENE3D); IPR002999 (PFAM); G3DSA:2.30.30.140 (GENE3D); IPR035437 (G3DSA:2.40.50.GENE3D); IPR035437 (G3DSA:2.40.50.GENE3D); IPR016071 (PFAM); mobidb-lite (MOBIDB_LITE); PTHR12302 (PANTHER); PTHR12302:SF2 (PANTHER); IPR016071 (PROSITE_PROFILES); IPR016071 (PROSITE_PROFILES); IPR016071 (PROSITE_PROFILES); IPR016071 (PR…	P:GO:0031047; C:GO:0016442	P:gene silencing by RNA; C:RISC complex
GMOY009287-PA	eukaryotic translation initiation factor 3 subunit E	436	20	0	97.2	6	F:GO:0003743; P:GO:0001731; C:GO:0016282; C:GO:0033290; P:GO:0006446; C:GO:0005852	F:translation initiation factor activity; P:formation of translation preinitiation complex; C:eukaryotic 43S preinitiation complex; C:eukaryotic 48S preinitiation complex; P:regulation of translational initiation; C:eukaryotic translation initiation factor 3 complex			IPR000717 (SMART); SM00753 (SMART); IPR019010 (SMART); IPR019010 (PFAM); IPR000717 (PFAM); IPR016650 (PIRSF); IPR036388 (G3DSA:1.10.10.GENE3D); PTHR10317:SF3 (PANTHER); IPR016650 (PANTHER); IPR016650 (HAMAP); IPR036390 (SUPERFAMILY)	F:GO:0003743; F:GO:0005515; C:GO:0005737; C:GO:0005852	F:translation initiation factor activity; F:protein binding; C:cytoplasm; C:eukaryotic translation initiation factor 3 complex
GMOY010846-PA	40S ribosomal S23	143	20	8.51949e-101	98.95	4	F:GO:0003735; C:GO:0022627; P:GO:0051298; P:GO:0002181	F:structural constituent of ribosome; C:cytosolic small ribosomal subunit; P:centrosome duplication; P:cytoplasmic translation			IPR006032 (PFAM); IPR005680 (TIGRFAM); IPR006032 (PIRSF); G3DSA:2.40.50.140 (GENE3D); mobidb-lite (MOBIDB_LITE); IPR006032 (PANTHER); PTHR11652:SF14 (PANTHER); IPR005680 (CDD); IPR012340 (SUPERFAMILY)	F:GO:0003735; C:GO:0015935; C:GO:0005840; C:GO:0005622; P:GO:0006412	F:structural constituent of ribosome; C:small ribosomal subunit; C:ribosome; C:intracellular; P:translation
GMOY011014-PA	D3	323	20	1.08954e-101	75.05	3	P:GO:0008150; C:GO:0005575; F:GO:0003674	P:biological_process; C:cellular_component; F:molecular_function			IPR036610 (G3DSA:3.90.280.GENE3D); IPR008914 (PFAM); mobidb-lite (MOBIDB_LITE); PTHR11362:SF7 (PANTHER); IPR035810 (PANTHER); IPR035810 (CDD); IPR036610 (SUPERFAMILY)	no GO terms	no GO terms
GMOY003929-PA	golgin-84 isoform X8	1301	20	1.52164e-144	62.6						IPR000533 (PRINTS); IPR000533 (PFAM); G3DSA:1.20.5.340 (GENE3D); mobidb-lite (MOBIDB_LITE); mobidb-lite (MOBIDB_LITE); mobidb-lite (MOBIDB_LITE); mobidb-lite (MOBIDB_LITE); mobidb-lite (MOBIDB_LITE); mobidb-lite (MOBIDB_LITE); PTHR19269:SF45 (PANTHER); PTHR19269 (PANTHER); PTHR19269:SF45 (PANTHER); SSF57997 (SUPERFAMILY); SSF57997 (SUPERFAMILY)	no GO terms	no GO terms
GMOY001423-PA	60S ribosomal L9	190	20	4.81085e-135	97.1	5	F:GO:0003735; P:GO:0051298; P:GO:0002181; C:GO:0022625; F:GO:0019843	F:structural constituent of ribosome; P:centrosome duplication; P:cytoplasmic translation; C:cytosolic large ribosomal subunit; F:rRNA binding			IPR000702 (PIRSF); IPR036789 (G3DSA:3.90.930.GENE3D); IPR036789 (G3DSA:3.90.930.GENE3D); IPR020040 (PFAM); IPR000702 (PANTHER); PTHR11655:SF16 (PANTHER); IPR036789 (SUPERFAMILY); IPR036789 (SUPERFAMILY)	F:GO:0003735; C:GO:0005840; F:GO:0019843; P:GO:0006412	F:structural constituent of ribosome; C:ribosome; F:rRNA binding; P:translation
GMOY006883-PA	signal recognition particle subunit SRP68	601	20	0	89.25	5	F:GO:0030942; P:GO:0006614; F:GO:0008312; F:GO:0005047; C:GO:0005786	F:endoplasmic reticulum signal peptide binding; P:SRP-dependent cotranslational protein targeting to membrane; F:7S RNA binding; F:signal recognition particle binding; C:signal recognition particle, endoplasmic reticulum targeting			IPR026258 (PIRSF); IPR026258 (PFAM); G3DSA:1.25.40.280 (GENE3D); mobidb-lite (MOBIDB_LITE); IPR026258 (PANTHER); IPR034652 (CDD)	F:GO:0030942; P:GO:0006614; F:GO:0003723; F:GO:0008312; F:GO:0005047; C:GO:0005786	F:endoplasmic reticulum signal peptide binding; P:SRP-dependent cotranslational protein targeting to membrane; F:RNA binding; F:7S RNA binding; F:signal recognition particle binding; C:signal recognition particle, endoplasmic reticulum targeting
GMOY012174-PA	hypothetical protein FF38_08007	415	20	0	80.75						IPR032063 (PFAM)	no GO terms	no GO terms
GMOY003405-PA	obg-like ATPase 1	397	20	0	94.4	6	F:GO:0005525; F:GO:0016887; F:GO:0005524; C:GO:0005737; F:GO:0043022; F:GO:0043023	F:GTP binding; F:ATPase activity; F:ATP binding; C:cytoplasm; F:ribosome binding; F:ribosomal large subunit binding	EC:3.6.1.3; EC:3.6.1.15	Adenosinetriphosphatase; Nucleoside-triphosphate phosphatase	IPR006073 (PRINTS); G3DSA:3.40.50.300 (GENE3D); IPR012675 (G3DSA:3.10.20.GENE3D); IPR006073 (PFAM); IPR004396 (PIRSF); IPR023192 (G3DSA:1.10.150.GENE3D); IPR004396 (TIGRFAM); IPR013029 (PFAM); PTHR23305:SF11 (PANTHER); PTHR23305 (PANTHER); IPR031167 (PROSITE_PROFILES); IPR004396 (HAMAP); cd04867 (CDD); cd01900 (CDD); IPR012676 (SUPERFAMILY); IPR027417 (SUPERFAMILY)	F:GO:0005525	F:GTP binding
GMOY005213-PA	dolichyl-diphosphooligosaccharide-- glycosyltransferase subunit 2	646	20	0	77.4	4	C:GO:0008250; P:GO:0035010; C:GO:0016021; P:GO:0006487	C:oligosaccharyltransferase complex; P:encapsulation of foreign target; C:integral component of membrane; P:protein N-linked glycosylation			IPR008814 (PFAM); IPR008814 (PANTHER)	C:GO:0008250; C:GO:0016021; P:GO:0006487	C:oligosaccharyltransferase complex; C:integral component of membrane; P:protein N-linked glycosylation
GMOY011979-PA	V-type proton ATPase subunit E	226	20	4.17178e-114	90.6	7	C:GO:0000221; C:GO:0033181; P:GO:0015991; P:GO:0045176; F:GO:0046961; P:GO:0007430; P:GO:0060439	C:vacuolar proton-transporting V-type ATPase, V1 domain; C:plasma membrane proton-transporting V-type ATPase complex; P:ATP hydrolysis coupled proton transport; P:apical protein localization; F:proton-transporting ATPase activity, rotational mechanism; P:terminal branching, open tracheal system; P:trachea morphogenesis	EC:3.6.1.3; EC:3.6.1.15	Adenosinetriphosphatase; Nucleoside-triphosphate phosphatase	IPR002842 (PFAM); PTHR12317 (PANTHER); PTHR12317:SF29 (PANTHER); IPR002842 (HAMAP); SSF160527 (SUPERFAMILY)	P:GO:0015991; F:GO:0046961; C:GO:0033178	P:ATP hydrolysis coupled proton transport; F:proton-transporting ATPase activity, rotational mechanism; C:proton-transporting two-sector ATPase complex, catalytic domain
GMOY008078-PA	serine threonine- phosphatase 2B catalytic subunit 3	576	20	0	95.5	4	F:GO:0004722; P:GO:0051533; P:GO:0006470; P:GO:0030431	F:protein serine/threonine phosphatase activity; P:positive regulation of NFAT protein import into nucleus; P:protein dephosphorylation; P:sleep	EC:3.1.3.16; EC:3.1.3.41	Protein-serine/threonine phosphatase; 4-nitrophenylphosphatase	IPR006186 (PRINTS); IPR006186 (SMART); IPR029052 (G3DSA:3.60.21.GENE3D); IPR004843 (PFAM); mobidb-lite (MOBIDB_LITE); mobidb-lite (MOBIDB_LITE); PTHR11668:SF261 (PANTHER); PTHR11668 (PANTHER); cd07416 (CDD); IPR029052 (SUPERFAMILY)	F:GO:0016787	F:hydrolase activity
GMOY013284-PA	Proteasome subunit alpha type-1	284	20	1.20168e-156	84.7	5	C:GO:0005634; C:GO:0005737; C:GO:0019773; F:GO:0004298; P:GO:0006511	C:nucleus; C:cytoplasm; C:proteasome core complex, alpha-subunit complex; F:threonine-type endopeptidase activity; P:ubiquitin-dependent protein catabolic process	EC:3.4.25	Acting on peptide bonds (peptidases)	IPR000426 (SMART); IPR029055 (G3DSA:3.60.20.GENE3D); IPR001353 (PFAM); IPR000426 (PFAM); mobidb-lite (MOBIDB_LITE); PTHR11599 (PANTHER); IPR035144 (PTHR11599:PANTHER); IPR023332 (PROSITE_PROFILES); IPR035144 (CDD); IPR029055 (SUPERFAMILY)	C:GO:0005839; F:GO:0004175; C:GO:0019773; F:GO:0004298; P:GO:0051603; P:GO:0006511	C:proteasome core complex; F:endopeptidase activity; C:proteasome core complex, alpha-subunit complex; F:threonine-type endopeptidase activity; P:proteolysis involved in cellular protein catabolic process; P:ubiquitin-dependent protein catabolic process
GMOY006441-PA	proteasome inhibitor PI31 subunit	251	20	6.18711e-90	69.3	6	P:GO:0008584; P:GO:0007140; C:GO:0070864; P:GO:0006974; P:GO:0032436; P:GO:0043248	P:male gonad development; P:male meiosis; C:sperm individualization complex; P:cellular response to DNA damage stimulus; P:positive regulation of proteasomal ubiquitin-dependent protein catabolic process; P:proteasome assembly			IPR021625 (PFAM); mobidb-lite (MOBIDB_LITE); mobidb-lite (MOBIDB_LITE); PTHR13266 (PANTHER)	no GO terms	no GO terms
GMOY010157-PA	eukaryotic translation initiation factor 3 subunit G-A	268	20	7.17998e-164	92.05	10	F:GO:0000166; F:GO:0003743; P:GO:0001731; C:GO:0016282; F:GO:0003729; P:GO:0007067; P:GO:0051726; C:GO:0033290; P:GO:0006446; C:GO:0005852	F:nucleotide binding; F:translation initiation factor activity; P:formation of translation preinitiation complex; C:eukaryotic 43S preinitiation complex; F:mRNA binding; P:mitotic nuclear division; P:regulation of cell cycle; C:eukaryotic 48S preinitiation complex; P:regulation of translational initiation; C:eukaryotic translation initiation factor 3 complex			IPR000504 (SMART); IPR024675 (PFAM); G3DSA:3.30.70.330 (GENE3D); IPR000504 (PFAM); PIRSF037949 (PIRSF); PTHR10352 (PANTHER); IPR017334 (PTHR10352:PANTHER); IPR000504 (PROSITE_PROFILES); IPR017334 (HAMAP); IPR024675 (CDD); IPR034240 (CDD); IPR035979 (SUPERFAMILY)	F:GO:0003676; F:GO:0003743; C:GO:0005737; C:GO:0005852	F:nucleic acid binding; F:translation initiation factor activity; C:cytoplasm; C:eukaryotic translation initiation factor 3 complex
GMOY007123-PA	L-asparaginase	671	20	0	87.8	2	P:GO:0006520; F:GO:0004067	P:cellular amino acid metabolic process; F:asparaginase activity	EC:3.5.1.1	Asparaginase	IPR006034 (PRINTS); IPR006034 (SMART); IPR002110 (SMART); IPR006033 (TIGRFAM); IPR037152 (G3DSA:3.40.50.GENE3D); IPR036770 (G3DSA:1.25.40.GENE3D); IPR020683 (PFAM); IPR006034 (PIRSF); IPR027473 (G3DSA:3.40.50.GENE3D); PIRSF500176 (PIRSF); IPR027474 (PFAM); mobidb-lite (MOBIDB_LITE); PTHR11707:SF28 (PANTHER); PTHR11707 (PANTHER); IPR006034 (PROSITE_PROFILES); IPR020683 (PROSITE_PROFILES); IPR00211…	F:GO:0005515; P:GO:0006520; F:GO:0004067	F:protein binding; P:cellular amino acid metabolic process; F:asparaginase activity
GMOY000262-PA	Eukaryotic translation initiation factor 3 subunit B	686	20	0	92.6	11	F:GO:0000166; F:GO:0003743; P:GO:0001731; C:GO:0016282; P:GO:0030707; C:GO:0005829; F:GO:0003729; C:GO:0033290; F:GO:0031369; P:GO:0006446; C:GO:0005852	F:nucleotide binding; F:translation initiation factor activity; P:formation of translation preinitiation complex; C:eukaryotic 43S preinitiation complex; P:ovarian follicle cell development; C:cytosol; F:mRNA binding; C:eukaryotic 48S preinitiation complex; F:translation initiation factor binding; P:regulation of translational initiation; C:eukaryotic translation initiation factor 3 complex			IPR000504 (SMART); IPR015943 (G3DSA:2.130.10.GENE3D); IPR000504 (PFAM); IPR015943 (G3DSA:2.130.10.GENE3D); G3DSA:3.30.70.330 (GENE3D); IPR011400 (PIRSF); IPR013979 (PFAM); mobidb-lite (MOBIDB_LITE); IPR011400 (PANTHER); IPR011400 (HAMAP); IPR000504 (PROSITE_PROFILES); IPR034363 (CDD); SSF82171 (SUPERFAMILY); IPR035979 (SUPERFAMILY)	F:GO:0003676; F:GO:0003743; F:GO:0005515; F:GO:0003723; P:GO:0006413; F:GO:0031369; C:GO:0005852	F:nucleic acid binding; F:translation initiation factor activity; F:protein binding; F:RNA binding; P:translational initiation; F:translation initiation factor binding; C:eukaryotic translation initiation factor 3 complex
GMOY008633-PA	death-associated 1	96	20	1.3531e-51	85.3	3	P:GO:0045892; P:GO:0006915; F:GO:0070513	P:negative regulation of transcription, DNA-templated; P:apoptotic process; F:death domain binding			IPR024130 (PFAM); mobidb-lite (MOBIDB_LITE); PTHR13177:SF3 (PANTHER); IPR024130 (PANTHER)	no GO terms	no GO terms
GMOY010262-PA	paxillin isoform X6	679	20	0	67.75	1	F:GO:0046872	F:metal ion binding			IPR001781 (SMART); G3DSA:2.10.110.10 (GENE3D); IPR001781 (PFAM); G3DSA:2.10.110.10 (GENE3D); G3DSA:2.10.110.10 (GENE3D); mobidb-lite (MOBIDB_LITE); mobidb-lite (MOBIDB_LITE); PTHR24216 (PANTHER); IPR001904 (PTHR24216:PANTHER); PTHR24216 (PANTHER); IPR001904 (PTHR24216:PANTHER); IPR001781 (PROSITE_PROFILES); IPR001781 (PROSITE_PROFILES); IPR001781 (PROSITE_PROFILES); IPR001781 (PROSITE_PROFILES); …	P:GO:0007160; C:GO:0005856	P:cell-matrix adhesion; C:cytoskeleton
GMOY002173-PA	glycine--tRNA ligase	679	20	0	90.35	4	F:GO:0004820; F:GO:0005524; P:GO:0006426; C:GO:0005737	F:glycine-tRNA ligase activity; F:ATP binding; P:glycyl-tRNA aminoacylation; C:cytoplasm	EC:6.1.1.14	Glycine--tRNA ligase	IPR002315 (PRINTS); IPR000738 (SMART); G3DSA:3.30.930.10 (GENE3D); IPR036621 (G3DSA:3.40.50.GENE3D); IPR004154 (PFAM); IPR000738 (PFAM); IPR002315 (TIGRFAM); IPR009068 (G3DSA:1.10.287.GENE3D); IPR002314 (PFAM); PTHR10745:SF0 (PANTHER); IPR027031 (PANTHER); IPR006195 (PROSITE_PROFILES); IPR000738 (PROSITE_PROFILES); cd00858 (CDD); cd00935 (CDD); IPR033731 (CDD); SSF55681 (SUPERFAMILY); IPR036621 (…	F:GO:0000166; F:GO:0005524; F:GO:0004820; P:GO:0006418; P:GO:0006426; F:GO:0004812; C:GO:0005737	F:nucleotide binding; F:ATP binding; F:glycine-tRNA ligase activity; P:tRNA aminoacylation for protein translation; P:glycyl-tRNA aminoacylation; F:aminoacyl-tRNA ligase activity; C:cytoplasm
GMOY002168-PA	40S ribosomal S12	139	20	3.52662e-98	93.55	10	P:GO:0007605; P:GO:0007638; P:GO:0001666; F:GO:0003735; C:GO:0022627; F:GO:0046872; P:GO:0002181; P:GO:0008049; P:GO:0032543; C:GO:0005763	P:sensory perception of sound; P:mechanosensory behavior; P:response to hypoxia; F:structural constituent of ribosome; C:cytosolic small ribosomal subunit; F:metal ion binding; P:cytoplasmic translation; P:male courtship behavior; P:mitochondrial translation; C:mitochondrial small ribosomal subunit			IPR000530 (PRINTS); IPR004038 (PFAM); IPR029064 (G3DSA:3.30.1330.GENE3D); PTHR11843:SF0 (PANTHER); IPR000530 (PANTHER); IPR029064 (SUPERFAMILY)	F:GO:0003735; C:GO:0005840; C:GO:0005622; P:GO:0006412	F:structural constituent of ribosome; C:ribosome; C:intracellular; P:translation
GMOY001813-PA	minor histocompatibility antigen H13	915	20	0	91.4	6	P:GO:0001522; F:GO:0003723; F:GO:0004190; P:GO:0006508; C:GO:0016021; F:GO:0009982	P:pseudouridine synthesis; F:RNA binding; F:aspartic-type endopeptidase activity; P:proteolysis; C:integral component of membrane; F:pseudouridine synthase activity	EC:5.4.99.12; EC:3.4.23	tRNA pseudouridine(38-40) synthase; Acting on peptide bonds (peptidases)	IPR006639 (SMART); IPR007369 (PFAM); mobidb-lite (MOBIDB_LITE); IPR007369 (PANTHER); PTHR12174:SF23 (PANTHER); IPR020103 (SUPERFAMILY)	P:GO:0001522; F:GO:0004190; F:GO:0003723; P:GO:0009451; C:GO:0016021; F:GO:0009982	P:pseudouridine synthesis; F:aspartic-type endopeptidase activity; F:RNA binding; P:RNA modification; C:integral component of membrane; F:pseudouridine synthase activity
GMOY004524-PA	eukaryotic translation initiation factor 3 subunit C	929	20	0	89	7	F:GO:0003743; P:GO:0001731; C:GO:0016282; C:GO:0033290; F:GO:0031369; P:GO:0006446; C:GO:0005852	F:translation initiation factor activity; P:formation of translation preinitiation complex; C:eukaryotic 43S preinitiation complex; C:eukaryotic 48S preinitiation complex; F:translation initiation factor binding; P:regulation of translational initiation; C:eukaryotic translation initiation factor 3 complex			SM00753 (SMART); IPR000717 (SMART); IPR008905 (PFAM); IPR000717 (PFAM); IPR036388 (G3DSA:1.10.10.GENE3D); mobidb-lite (MOBIDB_LITE); mobidb-lite (MOBIDB_LITE); mobidb-lite (MOBIDB_LITE); PTHR13937 (PANTHER); IPR027516 (HAMAP); IPR036390 (SUPERFAMILY)	F:GO:0003743; F:GO:0005515; F:GO:0003723; P:GO:0006413; F:GO:0031369; C:GO:0005852	F:translation initiation factor activity; F:protein binding; F:RNA binding; P:translational initiation; F:translation initiation factor binding; C:eukaryotic translation initiation factor 3 complex
GMOY002088-PA	serine threonine- kinase OSR1	551	20	0	86.9	3	F:GO:0005524; F:GO:0004674; P:GO:0006468	F:ATP binding; F:protein serine/threonine kinase activity; P:protein phosphorylation	EC:2.7.11	Transferring phosphorus-containing groups	IPR000719 (SMART); G3DSA:1.10.510.10 (GENE3D); IPR024678 (PFAM); G3DSA:3.10.20.90 (GENE3D); G3DSA:3.30.200.20 (GENE3D); IPR000719 (PFAM); mobidb-lite (MOBIDB_LITE); mobidb-lite (MOBIDB_LITE); IPR028749 (PTHR24361:PANTHER); PTHR24361 (PANTHER); IPR000719 (PROSITE_PROFILES); cd06610 (CDD); IPR011009 (SUPERFAMILY)	F:GO:0005524; F:GO:0004702; F:GO:0004672; P:GO:0006468; F:GO:0004674; P:GO:0035556	F:ATP binding; F:signal transducer, downstream of receptor, with serine/threonine kinase activity; F:protein kinase activity; P:protein phosphorylation; F:protein serine/threonine kinase activity; P:intracellular signal transduction
GMOY004812-PA	clavesin-1	296	20	2.35199e-180	86.8	3	P:GO:0006810; C:GO:0005622; F:GO:0005215	P:transport; C:intracellular; F:transporter activity			IPR001071 (PRINTS); IPR011074 (SMART); IPR001251 (SMART); IPR001251 (PFAM); G3DSA:1.10.8.20 (GENE3D); IPR036865 (G3DSA:3.40.525.GENE3D); PTHR10174 (PANTHER); PTHR10174:SF23 (PANTHER); IPR001251 (PROSITE_PROFILES); IPR001251 (CDD); IPR036273 (SUPERFAMILY); IPR036865 (SUPERFAMILY)	P:GO:0006810; C:GO:0005622; F:GO:0005215	P:transport; C:intracellular; F:transporter activity
GMOY004942-PA	triple functional domain	3421	20	0	91.2	5	P:GO:0035023; F:GO:0005089; C:GO:0005622; P:GO:0035556; P:GO:0043547	P:regulation of Rho protein signal transduction; F:Rho guanyl-nucleotide exchange factor activity; C:intracellular; P:intracellular signal transduction; P:positive regulation of GTPase activity			IPR001607 (SMART); IPR001849 (SMART); IPR018159 (SMART); IPR001251 (SMART); IPR000219 (SMART); IPR015940 (SMART); G3DSA:3.90.70.10 (GENE3D); IPR001607 (PFAM); G3DSA:1.20.58.60 (GENE3D); IPR035899 (G3DSA:1.20.900.GENE3D); IPR001394 (PFAM); IPR011993 (G3DSA:2.30.29.GENE3D); IPR015940 (PFAM); IPR013083 (G3DSA:3.30.40.GENE3D); G3DSA:1.20.58.60 (GENE3D); IPR035899 (G3DSA:1.20.900.GENE3D); IPR036865 (G…	P:GO:0016579; P:GO:0035023; F:GO:0008270; F:GO:0005515; F:GO:0005089; F:GO:0036459	P:protein deubiquitination; P:regulation of Rho protein signal transduction; F:zinc ion binding; F:protein binding; F:Rho guanyl-nucleotide exchange factor activity; F:thiol-dependent ubiquitinyl hydrolase activity
GMOY003329-PA	60S ribosomal L6	262	20	1.37744e-125	87.95	4	F:GO:0003735; P:GO:0051298; P:GO:0002181; C:GO:0022625	F:structural constituent of ribosome; P:centrosome duplication; P:cytoplasmic translation; C:cytosolic large ribosomal subunit			IPR005568 (PFAM); IPR014722 (G3DSA:2.30.30.GENE3D); IPR000915 (PFAM); mobidb-lite (MOBIDB_LITE); IPR000915 (PANTHER); PTHR10715:SF0 (PANTHER); cd13156 (CDD); IPR008991 (SUPERFAMILY)	F:GO:0003735; C:GO:0005840; C:GO:0005622; P:GO:0006412	F:structural constituent of ribosome; C:ribosome; C:intracellular; P:translation
GMOY006460-PA	serine--tRNA cytoplasmic	495	20	0	91.35	4	F:GO:0005524; C:GO:0005739; F:GO:0004828; P:GO:0070158	F:ATP binding; C:mitochondrion; F:serine-tRNA ligase activity; P:mitochondrial seryl-tRNA aminoacylation	EC:6.1.1.11	Serine--tRNA ligase	IPR002317 (PRINTS); IPR002317 (PIRSF); IPR002314 (PFAM); G3DSA:1.10.287.40 (GENE3D); IPR002317 (TIGRFAM); G3DSA:3.30.930.10 (GENE3D); IPR015866 (PFAM); PTHR11778:SF7 (PANTHER); IPR002317 (PANTHER); IPR006195 (PROSITE_PROFILES); IPR033729 (CDD); SSF55681 (SUPERFAMILY); IPR010978 (SUPERFAMILY)	F:GO:0000166; F:GO:0005524; P:GO:0006418; F:GO:0004812; C:GO:0005737; F:GO:0004828; P:GO:0006434	F:nucleotide binding; F:ATP binding; P:tRNA aminoacylation for protein translation; F:aminoacyl-tRNA ligase activity; C:cytoplasm; F:serine-tRNA ligase activity; P:seryl-tRNA aminoacylation
GMOY007542-PA	proline dehydrogenase mitochondrial isoform X3	520	20	0	92.5	3	F:GO:0004657; P:GO:0055114; P:GO:0006562	F:proline dehydrogenase activity; P:oxidation-reduction process; P:proline catabolic process	EC:1.5.99.8	Acting on the CH-NH group of donors	IPR029041 (G3DSA:3.20.20.GENE3D); IPR002872 (PFAM); IPR015659 (PANTHER); PTHR13914:SF0 (PANTHER); IPR029041 (SUPERFAMILY)	F:GO:0004657; P:GO:0006562	F:proline dehydrogenase activity; P:proline catabolic process
GMOY006207-PA	bifunctional glutamate proline--tRNA ligase	1555	20	0	69.15	7	F:GO:0005524; F:GO:0003723; C:GO:0005737; F:GO:0004827; F:GO:0004818; P:GO:0006424; P:GO:0006433	F:ATP binding; F:RNA binding; C:cytoplasm; F:proline-tRNA ligase activity; F:glutamate-tRNA ligase activity; P:glutamyl-tRNA aminoacylation; P:prolyl-tRNA aminoacylation	EC:6.1.1.15; EC:6.1.1.17	Proline--tRNA ligase; Glutamate--tRNA ligase	IPR000924 (PRINTS); IPR016061 (SMART); IPR000738 (SMART); IPR020056 (G3DSA:2.40.240.GENE3D); IPR016061 (PFAM); IPR036621 (G3DSA:3.40.50.GENE3D); G3DSA:3.30.930.10 (GENE3D); IPR014729 (G3DSA:3.40.50.GENE3D); IPR020059 (PFAM); IPR004526 (TIGRFAM); IPR009068 (G3DSA:1.10.287.GENE3D); IPR020056 (G3DSA:2.40.240.GENE3D); IPR002314 (PFAM); IPR017449 (G3DSA:3.30.110.GENE3D); IPR020061 (G3DSA:1.10.1160.GEN…	F:GO:0016876; F:GO:0000166; F:GO:0005524; P:GO:0006418; F:GO:0004812; C:GO:0005737; F:GO:0004827; F:GO:0004818; P:GO:0043039; P:GO:0006424; P:GO:0006433; P:GO:0006412	F:ligase activity, forming aminoacyl-tRNA and related compounds; F:nucleotide binding; F:ATP binding; P:tRNA aminoacylation for protein translation; F:aminoacyl-tRNA ligase activity; C:cytoplasm; F:proline-tRNA ligase activity; F:glutamate-tRNA ligase activity; P:tRNA aminoacylation; P:glutamyl-tRNA aminoacylation; P:prolyl-tRNA aminoacylation; P:translation
GMOY007037-PA	coatomer subunit gamma	863	20	0	91.85	18	P:GO:0008362; F:GO:0005198; P:GO:0048812; C:GO:0000139; C:GO:0005783; P:GO:0007112; P:GO:0006886; P:GO:0007436; P:GO:0009306; C:GO:0005801; P:GO:0000281; P:GO:0006909; P:GO:0030198; P:GO:0035147; P:GO:0035158; P:GO:0035149; C:GO:0030126; P:GO:0010883	P:chitin-based embryonic cuticle biosynthetic process; F:structural molecule activity; P:neuron projection morphogenesis; C:Golgi membrane; C:endoplasmic reticulum; P:male meiosis cytokinesis; P:intracellular protein transport; P:larval salivary gland morphogenesis; P:protein secretion; C:cis-Golgi network; P:mitotic cytokinesis; P:phagocytosis; P:extracellular matrix organization; P:branch fusio…			IPR032154 (PFAM); IPR011989 (G3DSA:1.25.10.GENE3D); IPR013040 (PFAM); IPR002553 (PFAM); IPR017106 (PIRSF); IPR037067 (G3DSA:2.60.40.GENE3D); G3DSA:3.30.310.10 (GENE3D); IPR017106 (PANTHER); IPR013041 (SUPERFAMILY); IPR016024 (SUPERFAMILY); IPR009028 (SUPERFAMILY)	C:GO:0030117; P:GO:0016192; F:GO:0005198; P:GO:0006886; F:GO:0005488; C:GO:0030126	C:membrane coat; P:vesicle-mediated transport; F:structural molecule activity; P:intracellular protein transport; F:binding; C:COPI vesicle coat
GMOY001933-PA	eukaryotic translation initiation factor 4 gamma 3	1595	20	0	68	12	F:GO:0003743; P:GO:0007095; F:GO:0000340; C:GO:0016281; P:GO:0048137; P:GO:0048136; P:GO:0000082; P:GO:0048515; C:GO:0005829; P:GO:0007067; P:GO:0006413; F:GO:0008190	F:translation initiation factor activity; P:mitotic G2 DNA damage checkpoint; F:RNA 7-methylguanosine cap binding; C:eukaryotic translation initiation factor 4F complex; P:spermatocyte division; P:male germ-line cyst formation; P:G1/S transition of mitotic cell cycle; P:spermatid differentiation; C:cytosol; P:mitotic nuclear division; P:translational initiation; F:eukaryotic initiation factor 4E …			IPR003307 (SMART); IPR003890 (SMART); IPR003891 (SMART); G3DSA:1.25.40.180 (GENE3D); IPR003891 (PFAM); G3DSA:1.25.40.180 (GENE3D); G3DSA:1.25.40.180 (GENE3D); IPR003890 (PFAM); mobidb-lite (MOBIDB_LITE); mobidb-lite (MOBIDB_LITE); mobidb-lite (MOBIDB_LITE); mobidb-lite (MOBIDB_LITE); PTHR23253 (PANTHER); IPR003307 (PROSITE_PROFILES); IPR003891 (PROSITE_PROFILES); cd11559 (CDD); IPR016024 (SUPERFA…	F:GO:0005515; F:GO:0003723; F:GO:0005488	F:protein binding; F:RNA binding; F:binding
GMOY010460-PA	hypothetical protein FF38_00521	200	1	1.28999e-06	71						mobidb-lite (MOBIDB_LITE)	no GO terms	no GO terms
GMOY002420-PA	thymosin beta	127	20	9.0183e-77	89.6	5	C:GO:0005829; P:GO:0007015; P:GO:0007420; P:GO:0035193; F:GO:0003785	C:cytosol; P:actin filament organization; P:brain development; P:larval central nervous system remodeling; F:actin monomer binding			IPR001152 (SMART); IPR001152 (PFAM); G3DSA:1.20.5.520 (GENE3D); mobidb-lite (MOBIDB_LITE); mobidb-lite (MOBIDB_LITE); PTHR20940 (PANTHER); IPR001152 (PRODOM)	P:GO:0007015; F:GO:0003785	P:actin filament organization; F:actin monomer binding
GMOY006519-PA	---NA---	200									PR01228 (PRINTS); mobidb-lite (MOBIDB_LITE)	no GO terms	no GO terms
GMOY000635-PA	eukaryotic peptide chain release factor GTP-binding subunit ERF3A isoform X1	599	20	0	85.9	8	F:GO:0005525; P:GO:0006415; F:GO:0003746; F:GO:0003747; F:GO:0003924; C:GO:0005829; P:GO:0006414; P:GO:0000288	F:GTP binding; P:translational termination; F:translation elongation factor activity; F:translation release factor activity; F:GTPase activity; C:cytosol; P:translational elongation; P:nuclear-transcribed mRNA catabolic process, deadenylation-dependent decay	EC:3.6.1.15	Nucleoside-triphosphate phosphatase	IPR003285 (PRINTS); IPR000795 (PRINTS); IPR004160 (PFAM); G3DSA:2.40.30.10 (GENE3D); IPR009818 (PFAM); G3DSA:2.40.30.10 (GENE3D); IPR000795 (PFAM); G3DSA:3.40.50.300 (GENE3D); IPR004161 (PFAM); mobidb-lite (MOBIDB_LITE); mobidb-lite (MOBIDB_LITE); PTHR23115:SF221 (PANTHER); PTHR23115 (PANTHER); IPR000795 (PROSITE_PROFILES); cd03704 (CDD); cd01883 (CDD); cd04089 (CDD); IPR027417 (SUPERFAMILY); IPR…	F:GO:0005525; P:GO:0006415; F:GO:0003747; F:GO:0003924; P:GO:0000288	F:GTP binding; P:translational termination; F:translation release factor activity; F:GTPase activity; P:nuclear-transcribed mRNA catabolic process, deadenylation-dependent decay
GMOY008236-PA	la-related 1	1814	20	0	80.85	6	P:GO:0000001; C:GO:0005739; P:GO:0007053; P:GO:0035186; C:GO:0005829; P:GO:0035071	P:mitochondrion inheritance; C:mitochondrion; P:spindle assembly involved in male meiosis; P:syncytial blastoderm mitotic cell cycle; C:cytosol; P:salivary gland cell autophagic cell death			IPR006607 (SMART); IPR006630 (SMART); IPR036388 (G3DSA:1.10.10.GENE3D); G3DSA:1.10.110.10 (GENE3D); IPR006630 (PFAM); mobidb-lite (MOBIDB_LITE); mobidb-lite (MOBIDB_LITE); mobidb-lite (MOBIDB_LITE); mobidb-lite (MOBIDB_LITE); mobidb-lite (MOBIDB_LITE); mobidb-lite (MOBIDB_LITE); mobidb-lite (MOBIDB_LITE); mobidb-lite (MOBIDB_LITE); mobidb-lite (MOBIDB_LITE); mobidb-lite (MOBIDB_LITE); mobidb-lite…	no GO terms	no GO terms
GMOY004194-PA	Regulator of chromosome condensation	512	20	0	73.45						IPR000408 (PRINTS); IPR009091 (G3DSA:2.130.10.GENE3D); IPR000408 (PFAM); mobidb-lite (MOBIDB_LITE); mobidb-lite (MOBIDB_LITE); PTHR22870:SF179 (PANTHER); PTHR22870 (PANTHER); IPR000408 (PROSITE_PROFILES); IPR000408 (PROSITE_PROFILES); IPR000408 (PROSITE_PROFILES); IPR000408 (PROSITE_PROFILES); IPR000408 (PROSITE_PROFILES); IPR000408 (PROSITE_PROFILES); IPR009091 (SUPERFAMILY)	no GO terms	no GO terms
[truncated: 294 more rows]
